# Supplementary material for: A multi-FLP approach for CO2 capture: investigating nitrogen, boron, phosphorus and aluminium doped nanographenes and the influence of a sodium cation
Source: Royal Society of Chemistry journal article supplement (doi:10.1039/d4cp00496e), 2024-01-01

## Multi-FLP Approach for CO<sub>2</sub> Capture: Investigating Nitrogen, Boron, Phosphorus and Aluminium Doped Nanographenes and the Influence of a Sodium Cation.

Maxime Ferrer,<sup>a,b</sup> Ibon Alkorta,\*<sup>a</sup> José Elguero,<sup>a</sup> Josep M. Oliva-Enrich<sup>c</sup>

<sup>a</sup> Instituto de Química Médica (CSIC), Juan de la Cierva, 3, E-28006 Madrid, Spain

<sup>b</sup> PhD Program in Theoretical Chemistry and Computational Modeling, Doctoral School, Universidad Autónoma de Madrid, 28049 Madrid, Spain

<sup>c</sup> Instituto de Química-Física Blas Cabrera (CSIC), Serrano, 119, E-28006 Madrid, Spain

\*Author to whom correspondence should be addressed: e-mail: [ibon@iqm.csic.es](mailto:ibon@iqm.csic.es)

### Index

|            |                                                                                                                                                                                                                                                                                                                   |
|------------|-------------------------------------------------------------------------------------------------------------------------------------------------------------------------------------------------------------------------------------------------------------------------------------------------------------------|
| Pg. S3-S8  | <b>Table S1:</b> Molecular graphs, energies (in Hartree) and Cartesian coordinates (in Å) of the monomers in vacuum. Level of theory: M06-2X/6-311++G**/M06-2X/6-31+G*                                                                                                                                            |
| Pg S9-S23  | <b>Table S2:</b> Molecular graphs, energies (in Hartree) and Cartesian coordinates (in Å) of the complexes in vacuum. Level of theory: M06-2X/6-311++G**/M06-2X/6-31+G*                                                                                                                                           |
| Pg S24-S38 | <b>Table S3:</b> Molecular graphs, energies (in Hartree) and Cartesian coordinates (in Å) of the transition states in vacuum. Level of theory: M06-2X/6-311++G**/M06-2X/6-31+G*                                                                                                                                   |
| Pg S39-S54 | <b>Table S4:</b> Molecular graphs, energies (in Hartree) and Cartesian coordinates (in Å) of the adducts in vacuum. Level of theory: M06-2X/6-311++G**/M06-2X/6-31+G*                                                                                                                                             |
| Pg S54-S64 | <b>Table S5:</b> Geometries, energies (in Hartree) and Cartesian coordinates (in Å) of the monomers with a Na <sup>+</sup> cation in vacuum. Level of theory: M06-2X/6-311++G**/M06-2X/6-31+G*                                                                                                                    |
| Pg S65-S81 | <b>Table S6:</b> Geometries, energies (in Hartree) and Cartesian coordinates (in Å) of the complexes with a Na <sup>+</sup> cation in vacuum. Level of theory: M06-2X/6-311++G**/M06-2X/6-31+G*                                                                                                                   |
| Pg S82-102 | <b>Table S7:</b> Geometries, energies (in Hartree) and Cartesian coordinates (in Å) of the transition states with a Na <sup>+</sup> cation in vacuum. Level of theory: M06-2X/6-311++G**/M06-2X/6-31+G*                                                                                                           |
| Pg 103-128 | <b>Table S8:</b> Geometries, energies (in Hartree) and Cartesian coordinates (in Å) of the adducts with a Na <sup>+</sup> cation in vacuum. Level of theory: M06-2X/6-311++G**/M06-2X/6-31+G*                                                                                                                     |
| Pg S129    | <b>Table S9.</b> Energy partition terms (kJ mol <sup>-1</sup> )                                                                                                                                                                                                                                                   |
| Pg.S130    | <b>Figure S1.</b> Overlap of the optimized geometry of B3N3-NG (blue) and CSD refcode FEWKIE (green)                                                                                                                                                                                                              |
| Pg. S131   | <b>Figure S2.</b> Free energy profiles of the capture of one CO <sub>2</sub> molecule by the B <sub>3</sub> N <sub>3</sub> -NG, B <sub>3</sub> P <sub>3</sub> -NG, Al <sub>3</sub> N <sub>3</sub> -NG and Al <sub>3</sub> P <sub>3</sub> -NG systems at M06-2X/6-311++G(3df,3dp)//M06-2X/6-31+G* level of theory. |
| Pg S132    | <b>Figure S3.</b> Exponential correlation of the six BCP's obtained for the Al-O and C-P contacts vs. the interatomic distances.                                                                                                                                                                                  |
| Pg S133    | <b>Figure S3:</b> Superposition of the NG-Na-up (blue), NG-Na-low (green) and NG (yellow) geometry, along with the decomposition of the binding energy ( $E_b = E_{def} + E_{interaction}$ ) in kJ/mol.                                                                                                           |

**Figure S4:** Comparative energy profiles of the reaction of  $B_3N_3$ -NG and  $B_3P_3$ -NG in the absence/presence of  $Na^+$  with three molecules of  $CO_2$ .

**Table S1:** Molecular graphs, energies (in Hartree) and Cartesian coordinates (in Å) of the monomers in vacuum. Level of theory: M06-2X/6-311++G\*\*/M06-2X/6-31+G\*

|                                                                                   |                                                                                                                                                                                                                                                                                                                                                                                                                                                                                                                                                                                                                                                                                                                                                                                                                                                                                                                                                                                                                                                                                                                                                                                                                                                                                                                                                                                                                                                                                                                                                                                                                                                                                                                                                                                                                                                                                                                                                                                                                                                                                                                                                                                                                                                                                                                                                                                                                                                                                                                         |
|-----------------------------------------------------------------------------------|-------------------------------------------------------------------------------------------------------------------------------------------------------------------------------------------------------------------------------------------------------------------------------------------------------------------------------------------------------------------------------------------------------------------------------------------------------------------------------------------------------------------------------------------------------------------------------------------------------------------------------------------------------------------------------------------------------------------------------------------------------------------------------------------------------------------------------------------------------------------------------------------------------------------------------------------------------------------------------------------------------------------------------------------------------------------------------------------------------------------------------------------------------------------------------------------------------------------------------------------------------------------------------------------------------------------------------------------------------------------------------------------------------------------------------------------------------------------------------------------------------------------------------------------------------------------------------------------------------------------------------------------------------------------------------------------------------------------------------------------------------------------------------------------------------------------------------------------------------------------------------------------------------------------------------------------------------------------------------------------------------------------------------------------------------------------------------------------------------------------------------------------------------------------------------------------------------------------------------------------------------------------------------------------------------------------------------------------------------------------------------------------------------------------------------------------------------------------------------------------------------------------------|
| 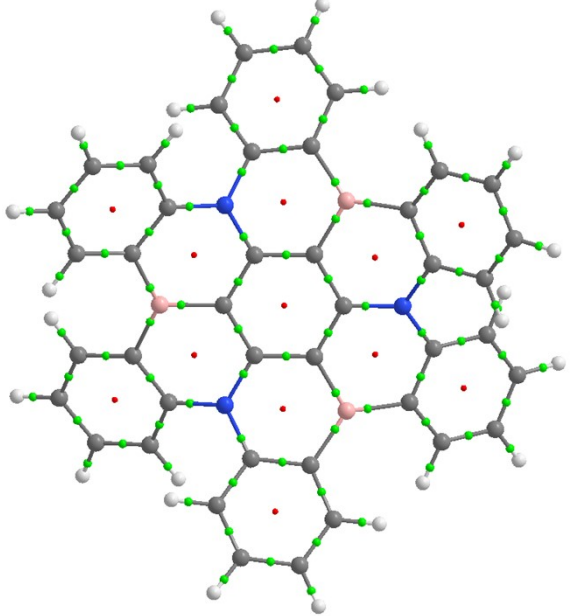 | <p><b>B<sub>3</sub>N<sub>3</sub>-NG</b><br/> <b>E=-1853,76255053H; FreqIm=0</b></p> <p>C,5.9457648015,0.0467337142,-1.5304176803<br/> C,3.534243308,1.0428831076,-0.4884418401<br/> C,3.7976504576,-0.3434250609,-0.4295793481<br/> C,4.4532463675,1.9051945347,-1.1124482162<br/> C,5.6448548046,1.4104493834,-1.6171905812<br/> N,0.2107413044,-2.7847857012,0.000199425<br/> N,2.3061291503,1.5749394123,0.0007123554<br/> C,1.2866353436,-0.6184756239,0.00088998<br/> C,2.6403858234,-2.7511295995,0.4311909472<br/> C,0.1055646379,-1.3944797896,0.0006125412<br/> C,3.395600822,3.455393147,1.1121327211<br/> H,4.2924036502,2.8561974677,1.2238950548<br/> C,2.2575978882,2.9126820765,0.4892773578<br/> C,1.1547597866,0.7885803327,0.000926251<br/> C,3.7654248187,-3.4144309809,0.9598186739<br/> H,4.7216361889,-2.8977272104,0.9527093055<br/> C,1.0620619153,3.6623633841,0.4308052359<br/> C,1.3933451595,-3.4116664177,0.4891339704<br/> C,1.2940634637,-4.6682934061,1.1124818957<br/> H,0.3266580432,-5.1451277398,1.2242993141<br/> C,3.6774978558,-4.6727684397,1.5312301106<br/> B,2.6432676173,-1.2705357381,0.0008282591<br/> C,3.3685619426,4.745595966,1.6162336089<br/> H,4.2546522831,5.140700408,2.1048514613<br/> C,2.2076391363,5.5219099686,1.529935187<br/> C,1.0739690472,4.9686632644,0.958607487<br/> H,0.148535215,5.5386948745,0.9508400662<br/> C,2.4247014289,-5.2899377543,1.6171112157<br/> H,2.3236393268,-6.2547322489,2.1059577069<br/> B,-0.2214590906,2.9243307487,0.0004682814<br/> C,-0.1078531834,1.4234174051,0.0010894573<br/> C,-5.884949781,-0.8492571974,1.532266446<br/> C,-3.6511287466,0.4987469631,0.4900707238<br/> C,-3.7026710921,-0.9114504265,0.4312957766<br/> C,-4.8394524792,-1.5543230147,0.9599805516<br/> H,-4.8702105536,-2.6407549574,0.9522972197<br/> C,-4.6895086353,1.2127781121,1.1140163015<br/> H,-4.6185899309,2.2889590474,1.2262015379<br/> C,-5.7930031572,0.5442598734,1.6187952758<br/> H,-6.5777031126,1.1139951631,2.1083297039<br/> N,-2.5170701371,1.2096744615,0.0011481735<br/> C,-1.1789275986,-0.8051705226,0.0007636015<br/> C,-2.1962578987,-3.1168543561,-0.431438451<br/> C,-3.8771532781,2.9038979512,-1.1114236244<br/> H,-4.6735447705,2.176432734,-1.2224973385<br/> C,-2.6705114107,2.5392094812,-0.4881162263<br/> C,-1.2604030132,0.6056736372,0.0010516931<br/> C,-3.2085538171,-3.941388364,-0.9611268357<br/> H,-4.2316759476,-3.5746357093,-0.9537690783<br/> C,-1.6014072999,3.4602947481,-0.4304906064</p> |
|-----------------------------------------------------------------------------------|-------------------------------------------------------------------------------------------------------------------------------------------------------------------------------------------------------------------------------------------------------------------------------------------------------------------------------------------------------------------------------------------------------------------------------------------------------------------------------------------------------------------------------------------------------------------------------------------------------------------------------------------------------------------------------------------------------------------------------------------------------------------------------------------------------------------------------------------------------------------------------------------------------------------------------------------------------------------------------------------------------------------------------------------------------------------------------------------------------------------------------------------------------------------------------------------------------------------------------------------------------------------------------------------------------------------------------------------------------------------------------------------------------------------------------------------------------------------------------------------------------------------------------------------------------------------------------------------------------------------------------------------------------------------------------------------------------------------------------------------------------------------------------------------------------------------------------------------------------------------------------------------------------------------------------------------------------------------------------------------------------------------------------------------------------------------------------------------------------------------------------------------------------------------------------------------------------------------------------------------------------------------------------------------------------------------------------------------------------------------------------------------------------------------------------------------------------------------------------------------------------------------------|

|                                                                                    |                                                                                                                                                                                                                                                                                                                                                                                                                                                                                                                                                                                                                                                                                                                                                                                                                                                                                                                                                                                                                                                                                                                                                                                                                                                                                                                                                                                                                                                                                                                                                                                                                                                               |
|------------------------------------------------------------------------------------|---------------------------------------------------------------------------------------------------------------------------------------------------------------------------------------------------------------------------------------------------------------------------------------------------------------------------------------------------------------------------------------------------------------------------------------------------------------------------------------------------------------------------------------------------------------------------------------------------------------------------------------------------------------------------------------------------------------------------------------------------------------------------------------------------------------------------------------------------------------------------------------------------------------------------------------------------------------------------------------------------------------------------------------------------------------------------------------------------------------------------------------------------------------------------------------------------------------------------------------------------------------------------------------------------------------------------------------------------------------------------------------------------------------------------------------------------------------------------------------------------------------------------------------------------------------------------------------------------------------------------------------------------------------|
|                                                                                    | <p>C,-0.8639756469,-3.5821018244,-0.489729495<br/> C,-0.5766143572,-4.8088720961,-1.1142298172<br/> H,0.4515509956,-5.1346427834,-1.2260655104<br/> C,-2.9321297337,-5.1714720346,-1.5339296397<br/> B,-2.4219512631,-1.6539722162,0.0002330689<br/> C,-4.0444870717,4.1828315261,-1.6170135438<br/> H,-4.9798509389,4.4395726029,-2.1060772542<br/> C,-3.0134233967,5.1249305887,-1.5320621862<br/> C,-1.8095247148,4.7491588961,-0.9601718018<br/> H,-0.9801423259,5.4515975786,-0.9534309117<br/> C,-1.6006872795,-5.5930082604,-1.6199908357<br/> H,-1.3554733048,-6.5309970608,-2.1099331615<br/> C,5.0184333842,-0.8077634984,-0.9580371406<br/> H,5.2126780264,-1.8771449623,-0.9500211487<br/> H,4.221220166,2.9584696881,-1.2246004219<br/> H,6.3348858489,2.0918011386,-2.1066906423<br/> H,2.1881543417,6.5284264931,1.9364081364<br/> H,6.8759138612,-0.3377110973,-1.9374858206<br/> H,4.5586721618,-5.1590840516,1.9382844646<br/> H,-3.7300065421,-5.7843252984,-1.9419376377<br/> H,-6.7465024454,-1.3694404208,1.9394607993<br/> H,-3.1453384187,6.1222729839,-1.9401815487</p>                                                                                                                                                                                                                                                                                                                                                                                                                                                                                                                                                              |
| 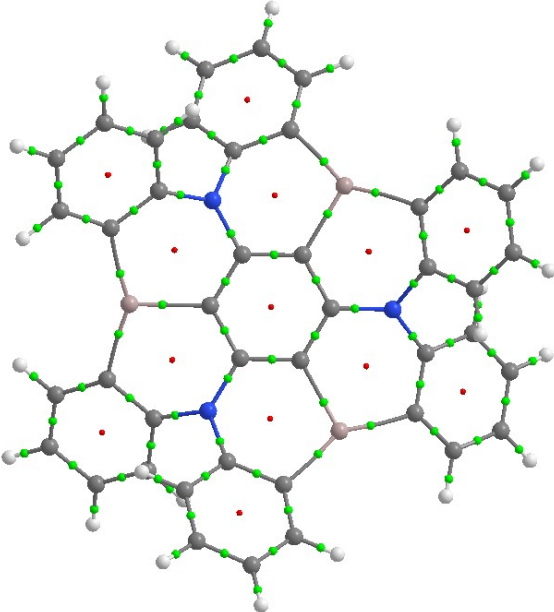 | <p><b>Al<sub>3</sub>N<sub>3</sub>-NG</b><br/> <b>E=-2506,33130006H; FreqIm=0</b><br/> C,-3.3221024606,-5.0760933257,1.9964184605<br/> C,-2.6420324123,-2.6691545265,0.6871992944<br/> C,-1.7512134554,-3.7718572593,0.6386817175<br/> C,-3.836373706,-2.7871479562,1.423419068<br/> C,-4.1725376859,-3.9702558236,2.0635992112<br/> N,2.4516642452,-1.4159883987,0.001689395<br/> N,-2.4521140465,-1.4152093193,0.001689395<br/> C,-0.000176586,-1.4182797989,0.0020903802<br/> C,1.749924064,-3.7717986257,-0.6376159534<br/> C,1.2072825031,-0.69722963,0.0020189464<br/> C,-4.3307966237,-1.9279099854,-1.4220748257<br/> H,-3.929382541,-2.9355438003,-1.478668765<br/> C,-3.6320816132,-0.9525128293,-0.685358695<br/> C,-1.2074598226,-0.696922503,0.0020189464<br/> C,2.1227309634,-4.9539258268,-1.3053247185<br/> H,1.4472079114,-5.8070677285,-1.2796791042<br/> C,-4.141435459,0.370420618,-0.6376159534<br/> C,2.640941114,-2.6692185321,-0.685358695<br/> C,3.8350173352,-2.7866249031,-1.4220748257<br/> H,4.5069467752,-1.9351732026,-1.478668765<br/> C,3.3196260868,-5.074448591,-1.9983516247<br/> C,-5.5224958838,-1.6273852247,-2.0639662645<br/> H,-6.033747119,-2.4031370642,-2.6272147442<br/> C,-6.0544144326,-0.3376562274,-1.9983516247<br/> C,-5.3515910954,0.638623973,-1.3053247185<br/> H,-5.7526721293,1.6502150477,-1.2796791042<br/> C,4.170604888,-3.9689291163,-2.0639662645<br/> H,5.0980513057,-4.023809754,-2.6272147442<br/> C,-1.2281780417,0.7092928267,0.0020903802<br/> C,2.7347883464,5.4121048167,-1.9983516247<br/> C,0.9911404998,3.6217313596,-0.685358695<br/> C,2.3915113956,3.4013780059,-0.6376159534</p> |

|  |                                                                                                                                                                                                                                                                                                                                                                                                                                                                                                                                                                                                                                                                                                                                                                                                                                                                                                                                                                                                                                                                                                                                                                                                                                                                                                                                                                                                                                                                                                                                                                                                                                                                                                                                                                                                                                                                                                                                          |
|--|------------------------------------------------------------------------------------------------------------------------------------------------------------------------------------------------------------------------------------------------------------------------------------------------------------------------------------------------------------------------------------------------------------------------------------------------------------------------------------------------------------------------------------------------------------------------------------------------------------------------------------------------------------------------------------------------------------------------------------------------------------------------------------------------------------------------------------------------------------------------------------------------------------------------------------------------------------------------------------------------------------------------------------------------------------------------------------------------------------------------------------------------------------------------------------------------------------------------------------------------------------------------------------------------------------------------------------------------------------------------------------------------------------------------------------------------------------------------------------------------------------------------------------------------------------------------------------------------------------------------------------------------------------------------------------------------------------------------------------------------------------------------------------------------------------------------------------------------------------------------------------------------------------------------------------------|
|  | <p> C,3.2288601326,4.3153018521,-1.3053247185<br/> H,4.3054642184,4.156852679,-1.2796791042<br/> C,0.495779289,4.7145348867,-1.4220748257<br/> H,-0.5775642337,4.8707170011,-1.478668765<br/> C,1.3518909963,5.5963143393,-2.0639662645<br/> H,0.9356958139,6.4269468165,-2.6272147442<br/> N,0.0004498019,2.8311977162,0.001689395<br/> C,1.2283546283,0.7089869704,0.0020903802<br/> C,4.1421309335,0.3693332888,0.6386817175<br/> C,-0.4955540804,4.7159710652,1.423419068<br/> H,0.5778030193,4.8717516182,1.4810843907<br/> C,-0.9905394196,3.6226444492,0.6871992944<br/> C,0.00017732,1.3941521311,0.0020189464<br/> C,5.353593861,0.6372669781,1.3040801512<br/> H,5.7550386634,1.6486893627,1.277412644<br/> C,-2.3909174775,3.4025239688,0.6386817175<br/> C,3.6325718325,-0.9534899245,0.6871992944<br/> C,4.331927787,-1.9288231108,1.423419068<br/> H,3.9301591534,-2.9362679029,1.4810843907<br/> C,6.0570770021,-0.338978463,1.9964184605<br/> C,-1.352073559,5.5986515453,2.0635992112<br/> H,-0.9362217208,6.429655376,2.6265432944<br/> C,-2.734974541,5.4150717869,1.9964184605<br/> C,-3.2286863228,4.3177147951,1.3040801512<br/> H,-4.305326203,4.1596649999,1.277412644<br/> C,5.5246112455,-1.6283957235,2.0635992112<br/> H,6.0363557544,-2.404035895,2.6265432944<br/> C,-2.1249075377,-4.954981775,1.3040801512<br/> H,-1.4497124599,-5.8083543644,1.277412644<br/> H,-4.5079621721,-1.935483717,1.4810843907<br/> H,-5.1001340331,-4.0256194828,2.6265432944<br/> H,-6.9898877453,-0.0993549542,-2.4956541202<br/> H,-3.5841053309,-6.00605004,2.4921306454<br/> H,3.5809877867,-6.003742881,-2.4956541202<br/> H,6.9934445762,-0.1009012475,2.4921306454<br/> H,3.4088999591,6.1030978334,-2.4956541202<br/> H,-3.4093392448,6.1069512856,2.4921306454<br/> Al,-2.8540660238,1.6482672995,0.0011791215<br/> Al,2.8544743663,1.6475600302,0.0011791215<br/> Al,-0.0004083419,-3.2958273315,0.0011791215 </p> |
|--|------------------------------------------------------------------------------------------------------------------------------------------------------------------------------------------------------------------------------------------------------------------------------------------------------------------------------------------------------------------------------------------------------------------------------------------------------------------------------------------------------------------------------------------------------------------------------------------------------------------------------------------------------------------------------------------------------------------------------------------------------------------------------------------------------------------------------------------------------------------------------------------------------------------------------------------------------------------------------------------------------------------------------------------------------------------------------------------------------------------------------------------------------------------------------------------------------------------------------------------------------------------------------------------------------------------------------------------------------------------------------------------------------------------------------------------------------------------------------------------------------------------------------------------------------------------------------------------------------------------------------------------------------------------------------------------------------------------------------------------------------------------------------------------------------------------------------------------------------------------------------------------------------------------------------------------|

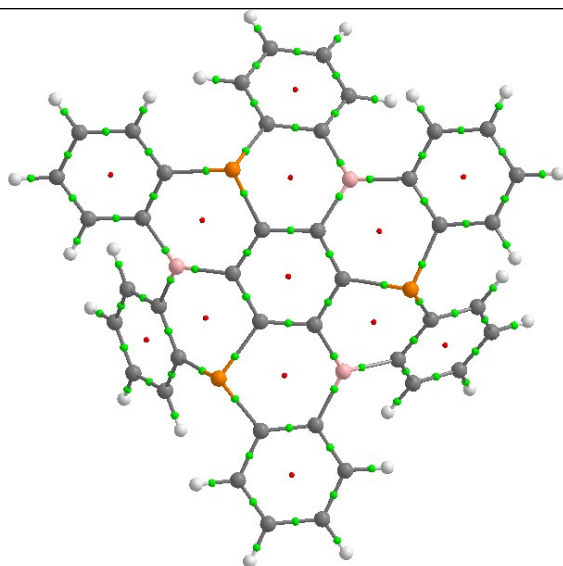

**B<sub>3</sub>P<sub>3</sub>-NG**

**E=-2713,46829567H; FreqIm=0**

C,0,5.159719,-0.09185,2.368629  
 C,0,3.625435,-1.16426,0.295214  
 C,0,3.624604,0.238393,0.491325  
 C,0,4.408558,-1.999278,1.092196  
 C,0,5.172644,-1.463256,2.128416  
 P,0,0.238814,3.175436,-1.113362  
 P,0,2.629998,-1.794664,-1.115894  
 C,0,1.308421,0.578714,-0.788643  
 C,0,2.975396,2.706733,-0.501795  
 C,0,0.167174,1.385239,-0.823058  
 C,0,3.193342,-4.480993,-0.958766  
 H,0,4.202557,-4.160065,-1.210722  
 C,0,2.186028,-3.524807,-0.765386  
 C,0,1.11604,-0.837302,-0.823455  
 C,0,4.304312,3.176167,-0.4658  
 H,0,5.10922,2.461207,-0.317422  
 C,0,0.856243,-3.929893,-0.4999  
 C,0,1.959185,3.655856,-0.764389  
 C,0,2.283095,5.006681,-0.956444  
 H,0,1.499927,5.720411,-1.205855  
 C,0,4.619989,4.518747,-0.637537  
 B,0,2.668364,1.184424,-0.327978  
 C,0,2.912384,-5.83963,-0.866963  
 H,0,3.70621,-6.567782,-1.00782  
 C,0,1.602479,-6.260302,-0.635261  
 C,0,0.598054,-5.315391,-0.462133  
 H,0,-0.4233,-5.654853,-0.311448  
 C,0,3.600227,5.442923,-0.866279  
 H,0,3.833376,6.494732,-1.005976  
 B,0,-0.307898,-2.902518,-0.324997  
 C,0,-0.153089,-1.422398,-0.78784  
 C,0,-6.223191,1.741347,-0.640751  
 C,0,-4.145497,-0.131448,-0.766316  
 C,0,-3.831979,1.222944,-0.501826  
 C,0,-4.903011,2.139013,-0.466174  
 H,0,-4.686642,3.193541,-0.317213  
 C,0,-5.476895,-0.526061,-0.961302  
 H,0,-5.702893,-1.560876,-1.212436  
 C,0,-6.513389,0.39637,-0.871814  
 H,0,-7.54067,0.072694,-1.013714  
 P,0,-2.868998,-1.381065,-1.114998  
 C,0,-1.155319,0.843702,-0.788184  
 C,0,-2.019218,3.018766,0.493456  
 C,0,-3.93536,-2.816178,1.0949  
 H,0,-4.86214,-2.270881,0.939407  
 C,0,-2.820606,-2.556697,0.297588  
 C,0,-1.283172,-0.547938,-0.823379  
 C,0,-2.839307,3.434066,1.557373  
 H,0,-3.751555,2.882376,1.7687  
 C,0,-1.605212,-3.256779,0.494944  
 C,0,-0.804346,3.720327,0.298746  
 C,0,-0.472073,4.814455,1.097485  
 H,0,0.464128,5.343926,0.943909  
 C,0,-2.500273,4.511602,2.372339

|                                                                                    |                                                                                                                                                                                                                                                                                                                                                                                                                                                                                                                                                                                                                                                                                                                                                                                                                                                                                                                                                                                                                                                                                                                                                                                                                                                                                                                                                                                                                                                                                                                                                                                                                                                                                                                                                                                                                                                                                |
|------------------------------------------------------------------------------------|--------------------------------------------------------------------------------------------------------------------------------------------------------------------------------------------------------------------------------------------------------------------------------------------------------------------------------------------------------------------------------------------------------------------------------------------------------------------------------------------------------------------------------------------------------------------------------------------------------------------------------------------------------------------------------------------------------------------------------------------------------------------------------------------------------------------------------------------------------------------------------------------------------------------------------------------------------------------------------------------------------------------------------------------------------------------------------------------------------------------------------------------------------------------------------------------------------------------------------------------------------------------------------------------------------------------------------------------------------------------------------------------------------------------------------------------------------------------------------------------------------------------------------------------------------------------------------------------------------------------------------------------------------------------------------------------------------------------------------------------------------------------------------------------------------------------------------------------------------------------------------|
|                                                                                    | <p>B,0,-2.36027,1.718104,-0.326923<br/> C,0,-3.853304,-3.744372,2.132451<br/> H,0,-4.719767,-3.922639,2.763432<br/> C,0,-2.659048,-4.41816,2.374014<br/> C,0,-1.555234,-4.172712,1.560549<br/> H,0,-0.621116,-4.685611,1.774036<br/> C,0,-1.318156,5.207455,2.133887<br/> H,0,-1.039198,6.045946,2.766158<br/> C,0,4.394605,0.740632,1.555206<br/> H,0,4.372476,1.806285,1.767552<br/> H,0,4.399494,-3.074655,0.937478<br/> H,0,5.7609,-2.124038,2.759272<br/> H,0,5.65586,4.843724,-0.606511<br/> H,0,5.736919,0.326685,3.187835<br/> H,0,1.365922,-7.31983,-0.602893<br/> H,0,-2.585214,-5.126186,3.194202<br/> H,0,-7.022654,2.4759,-0.61015<br/> H,0,-3.151555,4.801773,3.191516</p>                                                                                                                                                                                                                                                                                                                                                                                                                                                                                                                                                                                                                                                                                                                                                                                                                                                                                                                                                                                                                                                                                                                                                                                       |
| 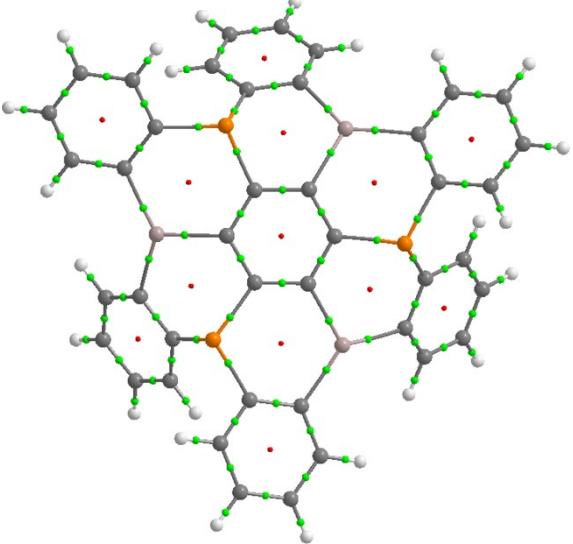 | <p><b>Al<sub>3</sub>P<sub>3</sub>-NG</b><br/> <b>E=-3366,12637918H; FreqIm=0</b><br/> C,-5.3923299403,0.7443761959,2.5548577153<br/> C,-3.6679386823,1.4080912739,0.4347690449<br/> C,-4.0382214713,0.0529245814,0.6408704193<br/> C,-4.155570687,2.398150549,1.2929422891<br/> C,-5.0125769339,2.065509188,2.3447137704<br/> P,-0.2368072596,-3.2351205902,-1.1008184559<br/> P,-2.6832929847,1.8226413958,-1.1008184559<br/> C,-1.3118537461,-0.5582032119,-0.8745527212<br/> C,-3.1205943672,-3.2106236721,-0.4998250268<br/> C,-0.1861996546,-1.3853908106,-0.8694719377<br/> C,-3.539117572,4.3953774786,-1.2398576076<br/> H,-4.4377608993,3.8872415965,-1.5861244976<br/> C,-2.3995771398,3.6426021285,-0.9096702806<br/> C,-1.106683808,0.8539490345,-0.8694719377<br/> C,-4.3212834941,-3.9379672119,-0.4046782693<br/> H,-5.2335415532,-3.4262847874,-0.1008361115<br/> C,-1.2201844775,4.3078258311,-0.4998250268<br/> C,-1.9547974105,-3.8993958274,-0.9096702806<br/> C,-2.0369497709,-5.2626544654,-1.2398576076<br/> H,-1.1475695247,-5.7868344747,-1.5861244976<br/> C,-4.3860907888,-5.2977379683,-0.6943702908<br/> C,-3.5440072229,5.7815292164,-1.1198355391<br/> H,-4.4413366447,6.3411747438,-1.3687597805<br/> C,-2.3949302679,6.4473350287,-0.6943702908<br/> C,-1.2497378968,5.711324887,-0.4046782693<br/> H,-0.3504788889,6.2455223286,-0.1008361115<br/> C,-3.2349475638,-5.9599648962,-1.1198355391<br/> H,-3.2709500968,-7.0168977347,-1.3687597805<br/> C,0.172508712,1.4152002743,-0.8745527212<br/> C,6.7810210564,-1.1495970639,-0.6943702908<br/> C,4.35437455,0.2567936953,-0.9096702806<br/> C,4.3407788445,-1.0972021625,-0.4998250268<br/> C,5.5710213907,-1.7733576786,-0.4046782693<br/> H,5.5840204419,-2.8192375449,-0.1008361115<br/> C,5.5760673427,0.8672769832,-1.2398576076<br/> H,5.5853304238,1.8995928746,-1.5861244976</p> |

|  |                                                                                                                                                                                                                                                                                                                                                                                                                                                                                                                                                                                                                                                                                                                                                                                                                                                                                                                                                                                                                                                                                                                                                                                                                                                                                                                                                                                                                                                                                                                                                                                                                                                                                                                                                                |
|--|----------------------------------------------------------------------------------------------------------------------------------------------------------------------------------------------------------------------------------------------------------------------------------------------------------------------------------------------------------------------------------------------------------------------------------------------------------------------------------------------------------------------------------------------------------------------------------------------------------------------------------------------------------------------------------------------------------------------------------------------------------------------------------------------------------------------------------------------------------------------------------------------------------------------------------------------------------------------------------------------------------------------------------------------------------------------------------------------------------------------------------------------------------------------------------------------------------------------------------------------------------------------------------------------------------------------------------------------------------------------------------------------------------------------------------------------------------------------------------------------------------------------------------------------------------------------------------------------------------------------------------------------------------------------------------------------------------------------------------------------------------------|
|  | <p> C,6.7789547865,0.1784356762,-1.1198355391<br/> H,7.7122867412,0.6757229873,-1.3687597805<br/> P,2.920100244,1.4124791907,-1.1008184559<br/> C,1.1393450339,-0.856997066,-0.8745527212<br/> C,1.9732767025,-3.5236646727,0.6408704193<br/> C,4.1546446419,2.3997545058,1.2929422891<br/> H,4.911855696,1.6331405164,1.1581335884<br/> C,3.0534121562,2.4724824396,0.4347690449<br/> C,1.2928834623,0.5314417726,-0.8694719377<br/> C,2.6609952218,-4.1112877438,1.7122262309<br/> H,3.6988590775,-3.8385809645,1.9000717113<br/> C,2.0649447686,3.4707400877,0.6408704193<br/> C,0.6145265259,-3.8805737171,0.4347690449<br/> C,0.0009260448,-4.7979050584,1.2929422891<br/> H,-1.041586672,-5.0703620725,1.1581335884<br/> C,2.0515162734,-5.0420828136,2.5548577153<br/> C,4.2950718964,3.3082643674,2.3447137704<br/> H,5.1562274754,3.2319875628,3.0032547855<br/> C,3.3408136667,4.2977066141,2.5548577153<br/> C,2.2299820163,4.3601333316,1.7122262309<br/> H,1.4748790898,5.1225964066,1.9000717113<br/> C,0.7175050373,-5.3737735589,2.3447137704<br/> H,0.2208695973,-6.0814177646,3.0032547855<br/> C,-4.8909772383,-0.2488455914,1.7122262309<br/> H,-5.1737381676,-1.2840154457,1.9000717113<br/> H,-3.8702690243,3.4372215526,1.1581335884<br/> H,-5.3770970729,2.8494301983,3.0032547855<br/> H,-5.3265369381,-5.8342862085,-0.6060532049<br/> H,-6.0633093963,0.4877191085,3.3697013277<br/> H,-2.3893715995,7.530059405,-0.6060532049<br/> H,3.4540318369,5.0071204121,3.3697013277<br/> H,7.7159085374,-1.6957732001,-0.6060532049<br/> H,2.6092775591,-5.4948395241,3.3697013277<br/> Al,2.6186860911,-1.9563655524,-0.3118850735<br/> Al,-3.0036053121,-1.2896659051,-0.3118850735<br/> Al,0.3849192207,3.2460314539,-0.3118850735 </p> |
|--|----------------------------------------------------------------------------------------------------------------------------------------------------------------------------------------------------------------------------------------------------------------------------------------------------------------------------------------------------------------------------------------------------------------------------------------------------------------------------------------------------------------------------------------------------------------------------------------------------------------------------------------------------------------------------------------------------------------------------------------------------------------------------------------------------------------------------------------------------------------------------------------------------------------------------------------------------------------------------------------------------------------------------------------------------------------------------------------------------------------------------------------------------------------------------------------------------------------------------------------------------------------------------------------------------------------------------------------------------------------------------------------------------------------------------------------------------------------------------------------------------------------------------------------------------------------------------------------------------------------------------------------------------------------------------------------------------------------------------------------------------------------|



**Table S2:** Molecular graphs, energies (in Hartree) and Cartesian coordinates (in Å) of the complexes in vacuum. Level of theory: M06-2X/6-311++G\*//M06-2X/6-31+G\*

|                                                                                   |                                                                                                                                                                                                                                                                                                                                                                                                                                                                                                                                                                                                                                                                                                                                                                                                                                                                                                                                                                                                                                                                                                                                                                                                                                                                                                                                                                                                                                                                                                                                                                                                                                                                                                                                                                                                                                                                                                                                                                                                                                                                                                                                                                                                                                                                                                                                                                                                                                                                                                                                                                                                             |
|-----------------------------------------------------------------------------------|-------------------------------------------------------------------------------------------------------------------------------------------------------------------------------------------------------------------------------------------------------------------------------------------------------------------------------------------------------------------------------------------------------------------------------------------------------------------------------------------------------------------------------------------------------------------------------------------------------------------------------------------------------------------------------------------------------------------------------------------------------------------------------------------------------------------------------------------------------------------------------------------------------------------------------------------------------------------------------------------------------------------------------------------------------------------------------------------------------------------------------------------------------------------------------------------------------------------------------------------------------------------------------------------------------------------------------------------------------------------------------------------------------------------------------------------------------------------------------------------------------------------------------------------------------------------------------------------------------------------------------------------------------------------------------------------------------------------------------------------------------------------------------------------------------------------------------------------------------------------------------------------------------------------------------------------------------------------------------------------------------------------------------------------------------------------------------------------------------------------------------------------------------------------------------------------------------------------------------------------------------------------------------------------------------------------------------------------------------------------------------------------------------------------------------------------------------------------------------------------------------------------------------------------------------------------------------------------------------------|
| 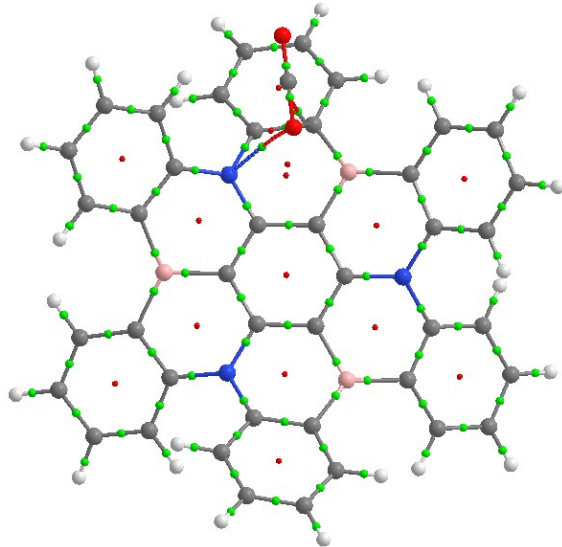 | <p><b>B<sub>3</sub>N<sub>3</sub>-NG:CO<sub>2</sub></b><br/> <b>E=-2042,35849833H; FreqIm=0</b></p> <p>C,3.7691300511,-4.9092887732,1.4419191275<br/> C,1.5036316179,-3.4973547201,0.5668282909<br/> C,2.783746287,-2.9189187479,0.419028982<br/> C,1.3674823637,-4.7487340318,1.1934985884<br/> C,2.4883579915,-5.4451145068,1.6156653091<br/> C,1.5457824196,-0.7011411922,0.0789208706<br/> C,4.0291922955,-0.5946771178,-0.5429991682<br/> C,1.5052609471,0.711169465,0.0710650721<br/> C,-0.663324242,-4.7504754159,-0.8984024315<br/> H,0.3302380161,-5.1456214449,-1.0785555237<br/> C,-0.8236223322,-3.5125507692,-0.2509206084<br/> C,0.3200166403,-1.3972698452,0.1740545065<br/> C,5.1748107062,-1.1422056885,-1.1538783071<br/> H,5.2989116069,-2.2219563592,-1.1469464055<br/> C,-2.114562194,-2.9594670862,-0.1014105177<br/> C,3.8525210717,0.8056364647,-0.5996637786<br/> C,4.7768335827,1.6003898446,-1.3010576377<br/> H,4.6058199851,2.6654988714,-1.4104090139<br/> C,6.1109062214,-0.3551869852,-1.8032961527<br/> B,2.8526829625,-1.4416331071,-0.018293938<br/> C,-1.7699485245,-5.4561591616,-1.3424167222<br/> H,-1.6223268651,-6.4039569554,-1.8521827237<br/> C,-3.0607711977,-4.9442989883,-1.1701277582<br/> C,-3.2137879192,-3.7050909034,-0.5711598528<br/> H,-4.2075160926,-3.2704956071,-0.4917465941<br/> C,5.8932132346,1.0245407785,-1.8853425617<br/> H,6.5874640593,1.6553819327,-2.4331097917<br/> B,-2.2100657936,-1.4907305522,0.3542646128<br/> C,-0.9179865556,-0.7251754165,0.272136446<br/> C,-2.4802779813,5.2831121766,-1.2419127139<br/> C,-2.2304631275,2.7001642505,-0.1574108801<br/> C,-1.1005791326,3.5464948819,-0.2120133043<br/> C,-1.2624492614,4.8346864463,-0.7583175558<br/> H,-0.3886676213,5.4764936131,-0.8361158907<br/> C,-3.4586474907,3.1407882468,-0.6838600591<br/> H,-4.322062322,2.4839746724,-0.6931215551<br/> C,-3.5779441567,4.4168960099,-1.2113373504<br/> H,-4.5333600961,4.72983685,-1.6227224848<br/> C,0.2892362455,1.4266349514,0.1566572298<br/> C,1.6275274314,3.5920803765,0.445845142<br/> C,-4.2111488725,1.5158026784,1.6045776733<br/> H,-4.062334095,2.5847038752,1.7103373444<br/> C,-3.2614203597,0.736386088,0.9206911828<br/> C,-0.9096504316,0.686729849,0.2593783671<br/> C,1.7612496332,4.9033907886,0.9434574207<br/> H,0.8762303605,5.5327741686,0.9886973305<br/> C,-3.4091006837,-0.6681902985,0.8698691984<br/> C,2.7734179286,2.7664802349,0.4357143698<br/> C,3.9852204104,3.2429198012,0.966440775<br/> H,4.8469620814,2.5875751186,1.0277028369<br/> C,2.9661930921,5.3900734406,1.4220719783</p> |
|-----------------------------------------------------------------------------------|-------------------------------------------------------------------------------------------------------------------------------------------------------------------------------------------------------------------------------------------------------------------------------------------------------------------------------------------------------------------------------------------------------------------------------------------------------------------------------------------------------------------------------------------------------------------------------------------------------------------------------------------------------------------------------------------------------------------------------------------------------------------------------------------------------------------------------------------------------------------------------------------------------------------------------------------------------------------------------------------------------------------------------------------------------------------------------------------------------------------------------------------------------------------------------------------------------------------------------------------------------------------------------------------------------------------------------------------------------------------------------------------------------------------------------------------------------------------------------------------------------------------------------------------------------------------------------------------------------------------------------------------------------------------------------------------------------------------------------------------------------------------------------------------------------------------------------------------------------------------------------------------------------------------------------------------------------------------------------------------------------------------------------------------------------------------------------------------------------------------------------------------------------------------------------------------------------------------------------------------------------------------------------------------------------------------------------------------------------------------------------------------------------------------------------------------------------------------------------------------------------------------------------------------------------------------------------------------------------------|

|                                                                                    |                                                                                                                                                                                                                                                                                                                                                                                                                                                                                                                                                                                                                                                                                                                                                                                                                                                                                                                                                                                                                                                                                                                                                                                                                                                                                                                                                                                                                                                                                                                                                                                      |
|------------------------------------------------------------------------------------|--------------------------------------------------------------------------------------------------------------------------------------------------------------------------------------------------------------------------------------------------------------------------------------------------------------------------------------------------------------------------------------------------------------------------------------------------------------------------------------------------------------------------------------------------------------------------------------------------------------------------------------------------------------------------------------------------------------------------------------------------------------------------------------------------------------------------------------------------------------------------------------------------------------------------------------------------------------------------------------------------------------------------------------------------------------------------------------------------------------------------------------------------------------------------------------------------------------------------------------------------------------------------------------------------------------------------------------------------------------------------------------------------------------------------------------------------------------------------------------------------------------------------------------------------------------------------------------|
|                                                                                    | <p>B,0.2715455021,2.9308694215,0.1278781788<br/> C,-5.327080571,0.9210436238,2.1699106176<br/> H,-6.0445619115,1.5405111336,2.7003334184<br/> C,-5.5175437873,-0.4628299575,2.0892665331<br/> C,-4.5548733389,-1.2354341458,1.4624352167<br/> H,-4.6589398062,-2.3173410749,1.4567734824<br/> C,4.0775863664,4.5402382661,1.4438555587<br/> H,5.0197819734,4.8840658007,1.8610387793<br/> C,3.8978323167,-3.656421703,0.8660630554<br/> H,4.8827722332,-3.2030831319,0.7905323163<br/> H,0.3813105346,-5.162467058,1.373077981<br/> H,2.3599599168,-6.4042834762,2.1091439264<br/> O,-2.9490975277,-0.0583305108,-2.3065280448<br/> C,-4.0805455474,0.0652678122,-2.06797478<br/> O,-5.2156676833,0.193731382,-1.8440230591<br/> H,6.9814303597,-0.8031213116,-2.272558212<br/> H,-2.5763863658,6.2779105387,-1.6657805455<br/> H,-6.3901667707,-0.924219855,2.5410628217<br/> H,-3.9234479961,-5.4960565623,-1.5306752928<br/> H,4.6436102063,-5.4535608915,1.7850068075<br/> H,3.0408550813,6.4023034027,1.8074048571<br/> N,-2.1225232647,1.372008371,0.3479031602<br/> N,2.701139576,1.4211902744,-0.0286987173<br/> N,0.3323286095,-2.7920215493,0.1664015677</p>                                                                                                                                                                                                                                                                                                                                                                                                               |
| 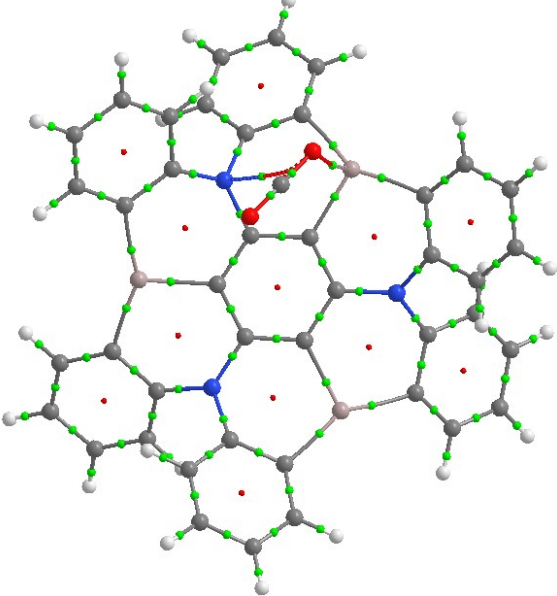 | <p><b>Al<sub>3</sub>N<sub>3</sub>-NG:CO<sub>2</sub></b><br/> <b>E=-2694,93518542H; FreqIm=0</b><br/> C,3.0209041663,-5.3902500543,2.0512020539<br/> C,1.2266406381,-3.6146064918,0.7857393219<br/> C,2.6221110419,-3.3626265906,0.7309711378<br/> C,0.7620976846,-4.7321889169,1.5055958786<br/> C,1.6427855442,-5.6064530247,2.1235803923<br/> C,1.4077202165,-0.683092133,0.1248574836<br/> C,4.2979420014,-0.2968856257,-0.5689266611<br/> C,1.3610214569,0.7226191608,0.123906841<br/> C,-0.2713741249,-4.6960417601,-1.3238956685<br/> H,0.8034493122,-4.8404404688,-1.3842063499<br/> C,-0.776306176,-3.6215201013,-0.5666576647<br/> C,0.1932418759,-1.3959517995,0.1446292794<br/> C,5.5021905708,-0.5549201113,-1.2516947069<br/> H,5.9246197249,-1.5572820179,-1.2097214575<br/> C,-2.1784272376,-3.412185533,-0.5159419064<br/> C,3.7602922257,1.0145434081,-0.6364936749<br/> C,4.4237803324,1.9846576684,-1.4125490437<br/> H,3.9996354952,2.9814730131,-1.4892639071<br/> C,6.1720150954,0.418307026,-1.9804453774<br/> C,-1.1179814622,-5.5768421452,-1.9802101688<br/> H,-0.6933324932,-6.3946006859,-2.5559078611<br/> C,-2.5016081054,-5.40553651,-1.9116390662<br/> C,-3.0042072434,-4.3230637931,-1.2009256463<br/> H,-4.0824502568,-4.1740958877,-1.1760565387<br/> C,5.6096837236,1.6935851875,-2.0692075941<br/> H,6.0924051004,2.4656387777,-2.6619441062<br/> C,-1.0447600427,-0.7373982093,0.1727276043<br/> C,-3.4634944425,4.9496301451,-1.6727420942<br/> C,-2.6135067168,2.5787846704,-0.3929937492<br/> C,-1.7278788141,3.684029841,-0.4860206042</p> |

|  |                                                                                                                                                                                                                                                                                                                                                                                                                                                                                                                                                                                                                                                                                                                                                                                                                                                                                                                                                                                                                                                                                                                                                                                                                                                                                                                                                                                                                                                                                                                                                                                                                                                                                                                                                                                                                                                                                                                                                                                                                                                                                                                                                                                                |
|--|------------------------------------------------------------------------------------------------------------------------------------------------------------------------------------------------------------------------------------------------------------------------------------------------------------------------------------------------------------------------------------------------------------------------------------------------------------------------------------------------------------------------------------------------------------------------------------------------------------------------------------------------------------------------------------------------------------------------------------------------------------------------------------------------------------------------------------------------------------------------------------------------------------------------------------------------------------------------------------------------------------------------------------------------------------------------------------------------------------------------------------------------------------------------------------------------------------------------------------------------------------------------------------------------------------------------------------------------------------------------------------------------------------------------------------------------------------------------------------------------------------------------------------------------------------------------------------------------------------------------------------------------------------------------------------------------------------------------------------------------------------------------------------------------------------------------------------------------------------------------------------------------------------------------------------------------------------------------------------------------------------------------------------------------------------------------------------------------------------------------------------------------------------------------------------------------|
|  | <p> C,-2.188806182,4.8467743471,-1.1335876033<br/> H,-1.5199541624,5.7017993322,-1.214548133<br/> C,-3.9008852766,2.6841631218,-0.9598833147<br/> H,-4.5805334597,1.8383439791,-0.8893562324<br/> C,-4.3183784278,3.8481726651,-1.5861928733<br/> H,-5.3153825732,3.8927709087,-2.0158378264<br/> C,0.1377430703,1.41807161,0.1753449894<br/> C,1.8395149208,3.8415597638,0.597765125<br/> C,-3.9751462724,1.7964707297,1.9664825239<br/> H,-3.5875000055,2.811525098,1.9763240535<br/> C,-3.393450141,0.8473323525,1.111164696<br/> C,-1.0451670603,0.6648119508,0.2099911019<br/> C,2.2022345769,5.0648206538,1.1930008503<br/> H,1.5098525896,5.9027496693,1.1353372682<br/> C,-3.8793256762,-0.4822048746,1.1011595577<br/> C,2.7542177921,2.7602573195,0.6869293207<br/> C,3.95653933,2.9385414603,1.3965855587<br/> H,4.6449994457,2.1032076197,1.4859542807<br/> C,3.4088351721,5.2446198029,1.8560552511<br/> C,-5.0422616171,1.4559095433,2.7873053426<br/> H,-5.4732237932,2.2076157848,3.4426801728<br/> C,-5.5469936384,0.1553752754,2.7783719317<br/> C,-4.9531512446,-0.7926395508,1.9518563349<br/> H,-5.3381194009,-1.8105005281,1.9661511351<br/> C,4.2806975555,4.1595900069,1.9682345333<br/> H,5.2156949738,4.2614822384,2.5120533844<br/> C,3.484775035,-4.2703473431,1.3748985809<br/> H,4.5575002146,-4.0881212913,1.3432233039<br/> H,-0.3071651817,-4.9120698523,1.5683536515<br/> H,1.2497281642,-6.4565594736,2.6742943043<br/> H,-3.7873493928,5.8640293143,-2.1605506852<br/> H,-6.3826562221,-0.1156036436,3.4170162608<br/> H,3.6608787069,6.2043305252,2.2972307133<br/> H,3.7141397866,-6.0751542793,2.53027942<br/> H,7.1037412576,0.1878436625,-2.4883534346<br/> H,-3.1704920726,-6.094009831,-2.4196078878<br/> O,-1.746976897,0.7515771175,-2.9558469021<br/> C,-2.4863484013,0.0348111358,-2.4368258248<br/> O,-3.2574938161,-0.7045332919,-1.9468325683<br/> N,2.5850336341,1.4700534979,0.0632086975<br/> N,0.2152116315,-2.8317870875,0.1251460465<br/> N,-2.3271584284,1.3289001848,0.252666797<br/> Al,0.0755215398,3.2890008048,0.0630557666<br/> Al,-2.6931813801,-1.6675129219,0.1353527642<br/> Al,3.048007236,-1.5962805447,0.0999714219 </p> |
|--|------------------------------------------------------------------------------------------------------------------------------------------------------------------------------------------------------------------------------------------------------------------------------------------------------------------------------------------------------------------------------------------------------------------------------------------------------------------------------------------------------------------------------------------------------------------------------------------------------------------------------------------------------------------------------------------------------------------------------------------------------------------------------------------------------------------------------------------------------------------------------------------------------------------------------------------------------------------------------------------------------------------------------------------------------------------------------------------------------------------------------------------------------------------------------------------------------------------------------------------------------------------------------------------------------------------------------------------------------------------------------------------------------------------------------------------------------------------------------------------------------------------------------------------------------------------------------------------------------------------------------------------------------------------------------------------------------------------------------------------------------------------------------------------------------------------------------------------------------------------------------------------------------------------------------------------------------------------------------------------------------------------------------------------------------------------------------------------------------------------------------------------------------------------------------------------------|

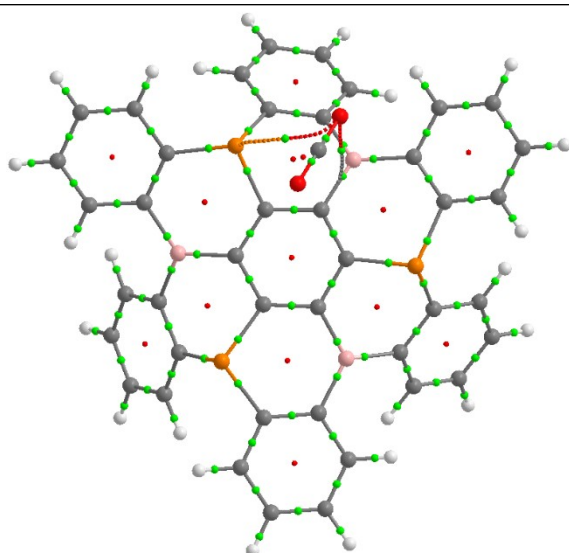

**B<sub>3</sub>P<sub>3</sub>-NG:CO<sub>2</sub>**

**E=-2902,06448288H; FreqIm=0**

C,0,-3.704652,3.910573,-2.355269  
 C,0,-3.411223,2.051614,-0.290759  
 C,0,-2.344971,2.942505,-0.56547  
 C,0,-4.606735,2.122362,-1.005927  
 C,0,-4.75158,3.049299,-2.037749  
 P,0,2.171006,2.207327,0.733476  
 P,0,-3.165703,0.888628,1.111666  
 C,0,-0.524081,1.375747,0.594372  
 C,0,0.033333,4.016429,0.265242  
 C,0,0.823441,1.008071,0.537278  
 C,0,-5.601757,-0.385597,1.134474  
 H,0,-5.97737,0.598368,1.409469  
 C,0,-4.240492,-0.555346,0.843341  
 C,0,-1.488862,0.327376,0.701673  
 C,0,-0.453646,5.339316,0.261433  
 H,0,-1.525127,5.503529,0.1845  
 C,0,-3.727244,-1.840245,0.546445  
 C,0,1.426874,3.839496,0.435274  
 C,0,2.272484,4.949714,0.571364  
 H,0,3.336001,4.801479,0.74981  
 C,0,0.388961,6.438427,0.377794  
 B,0,-0.953485,2.809424,0.159337  
 C,0,-6.475165,-1.467295,1.110834  
 H,0,-7.529087,-1.317559,1.327648  
 C,0,-5.983937,-2.746535,0.848749  
 C,0,-4.631918,-2.920977,0.578292  
 H,0,-4.255424,-3.925556,0.404699  
 C,0,1.763359,6.242435,0.515406  
 H,0,2.432543,7.092805,0.61113  
 B,0,-2.210911,-2.086419,0.262249  
 C,0,-1.135786,-1.024327,0.645035  
 C,0,5.141087,-3.70054,0.084374  
 C,0,2.387918,-3.288499,0.377695  
 C,0,3.215776,-2.186054,0.063783  
 C,0,4.599239,-2.428445,-0.051867  
 H,0,5.265012,-1.58781,-0.228553  
 C,0,2.940506,-4.568465,0.535642  
 H,0,2.302404,-5.401217,0.826085  
 C,0,4.302968,-4.781519,0.361074  
 H,0,4.714293,-5.780547,0.474891  
 P,0,0.641121,-3.094976,0.850629  
 C,0,1.245346,-0.356744,0.480368  
 C,0,3.39201,0.359359,-0.937051  
 C,0,0.054039,-4.832627,-1.319362  
 H,0,1.073026,-5.200232,-1.236321  
 C,0,-0.396639,-3.806216,-0.489281  
 C,0,0.256506,-1.340598,0.584582  
 C,0,4.16663,-0.011614,-2.049878  
 H,0,4.30812,-1.066862,-2.267643  
 C,0,-1.720589,-3.3143,-0.592743  
 C,0,3.173762,1.743628,-0.733161  
 C,0,3.756968,2.694431,-1.570695  
 H,0,3.579432,3.753963,-1.40846  
 C,0,4.731609,0.933209,-2.903425

|                                                                                    |                                                                                                                                                                                                                                                                                                                                                                                                                                                                                                                                                                                                                                                                                                                                                                                                                                                                                                                                                                                                                                                                                                                                                                                                                                                                                                                                                                                                                                                                                                                                                                                                                                                                                                                                 |
|------------------------------------------------------------------------------------|---------------------------------------------------------------------------------------------------------------------------------------------------------------------------------------------------------------------------------------------------------------------------------------------------------------------------------------------------------------------------------------------------------------------------------------------------------------------------------------------------------------------------------------------------------------------------------------------------------------------------------------------------------------------------------------------------------------------------------------------------------------------------------------------------------------------------------------------------------------------------------------------------------------------------------------------------------------------------------------------------------------------------------------------------------------------------------------------------------------------------------------------------------------------------------------------------------------------------------------------------------------------------------------------------------------------------------------------------------------------------------------------------------------------------------------------------------------------------------------------------------------------------------------------------------------------------------------------------------------------------------------------------------------------------------------------------------------------------------|
|                                                                                    | <p>B,0,2.658892,-0.731236,-0.067884<br/> C,0,-0.786624,-5.361136,-2.298403<br/> H,0,-0.418976,-6.143698,-2.956504<br/> C,0,-2.080551,-4.869059,-2.44812<br/> C,0,-2.533944,-3.860141,-1.601543<br/> H,0,-3.536772,-3.466075,-1.743934<br/> C,0,4.533257,2.288786,-2.655674<br/> H,0,4.964053,3.035393,-3.317187<br/> C,0,-2.521357,3.852443,-1.622721<br/> H,0,-1.701947,4.512217,-1.895624<br/> H,0,-5.41805,1.432309,-0.791282<br/> H,0,-5.677668,3.080905,-2.605202<br/> O,0,2.018085,0.278314,3.836578<br/> C,0,2.935856,0.0561,3.160306<br/> O,0,3.863844,-0.181351,2.496211<br/> H,0,-0.022438,7.443588,0.374399<br/> H,0,-3.806286,4.619442,-3.171711<br/> H,0,-6.651117,-3.603335,0.868432<br/> H,0,-2.730903,-5.263774,-3.223146<br/> H,0,6.213009,-3.849349,-0.007808<br/> H,0,5.31796,0.612519,-3.759464</p>                                                                                                                                                                                                                                                                                                                                                                                                                                                                                                                                                                                                                                                                                                                                                                                                                                                                                                         |
| 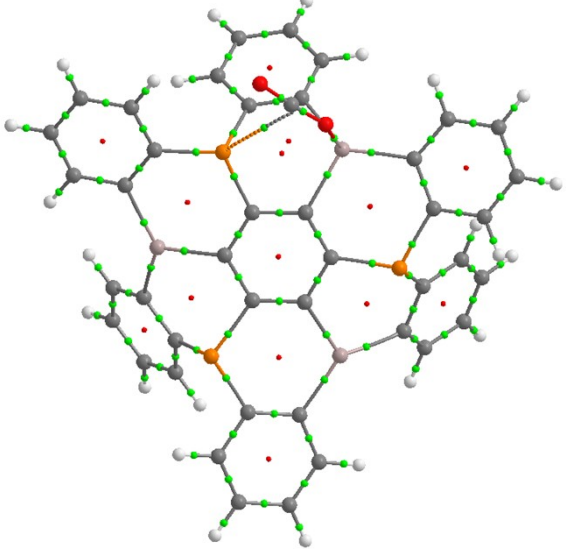 | <p><b>Al<sub>3</sub>P<sub>3</sub>-NG:CO<sub>2</sub></b><br/> <b>E=-3554,73212323H; FreqIm=0</b><br/> C,-3.649910148,4.2823721151,2.3998146868<br/> C,-1.8312448994,3.5381747771,0.386687511<br/> C,-3.0811043362,2.8720370166,0.4867399224<br/> C,-1.511102653,4.5486168283,1.2983698018<br/> C,-2.4166831236,4.9168601543,2.2961562757<br/> P,-2.6846809084,-2.1255087535,-1.2730456284<br/> P,-0.7455290414,3.1436671589,-1.0858367848<br/> C,-1.5160389166,0.5033177526,-0.9386798178<br/> C,-4.7042222832,-0.0266235632,-0.8391810686<br/> C,-1.3393702961,-0.882697735,-0.922546333<br/> C,0.4807482624,5.5639467287,-1.0671310856<br/> H,-0.5015839219,5.8603740677,-1.4321059138<br/> C,0.7373917022,4.2106948526,-0.7835829913<br/> C,-0.3589824385,1.3334489916,-0.8490949161<br/> C,-6.0628583552,0.3384362201,-0.860820483<br/> H,-6.3492318028,1.3493869809,-0.5737662652<br/> C,2.0250939087,3.8182820649,-0.3545164632<br/> C,-4.3620613426,-1.3427687001,-1.2292712833<br/> C,-5.370889474,-2.2228711731,-1.6554044074<br/> H,-5.1053335589,-3.225913086,-1.985584412<br/> C,-7.061134674,-0.552064535,-1.2454745548<br/> C,1.4565527521,6.5360494239,-0.8760130449<br/> H,1.2306724904,7.5774633045,-1.0878954946<br/> C,2.7243107305,6.1668541334,-0.4263752478<br/> C,2.9959627124,4.822999345,-0.187098314<br/> H,3.9992716761,4.5465254916,0.1371172342<br/> C,-6.7083244319,-1.8391435692,-1.6500611168<br/> H,-7.4723368508,-2.5416027445,-1.9713815534<br/> C,0.9307599037,0.8030659592,-0.7675392758<br/> C,3.6299427522,-5.7332102047,-0.2419992329<br/> C,2.9804483784,-3.016596335,-0.5411557798<br/> C,1.9572238649,-3.9447212554,-0.2366823518<br/> C,2.3156926812,-5.2979110186,-0.0965517968</p> |

|  |                                                                                                                                                                                                                                                                                                                                                                                                                                                                                                                                                                                                                                                                                                                                                                                                                                                                                                                                                                                                                                                                                                                                                                                                                                                                                                                                                                                                                                                                                                                                                                                                                                                                                                                                                                                                                                                                                                                                                                                                                                                                      |
|--|----------------------------------------------------------------------------------------------------------------------------------------------------------------------------------------------------------------------------------------------------------------------------------------------------------------------------------------------------------------------------------------------------------------------------------------------------------------------------------------------------------------------------------------------------------------------------------------------------------------------------------------------------------------------------------------------------------------------------------------------------------------------------------------------------------------------------------------------------------------------------------------------------------------------------------------------------------------------------------------------------------------------------------------------------------------------------------------------------------------------------------------------------------------------------------------------------------------------------------------------------------------------------------------------------------------------------------------------------------------------------------------------------------------------------------------------------------------------------------------------------------------------------------------------------------------------------------------------------------------------------------------------------------------------------------------------------------------------------------------------------------------------------------------------------------------------------------------------------------------------------------------------------------------------------------------------------------------------------------------------------------------------------------------------------------------------|
|  | <p> H,1.5453686204,-6.0343025878,0.1283477226<br/> C,4.2986386248,-3.4663980105,-0.7216948808<br/> H,5.0803690492,-2.7543823015,-0.9826240936<br/> C,4.62489851,-4.8094395807,-0.5604799727<br/> H,5.6528854797,-5.1347336106,-0.6933086179<br/> P,2.8237496406,-1.187840666,-0.7406619862<br/> C,-0.0466526357,-1.4722508307,-0.8127226029<br/> C,-1.5246063662,-3.9184821023,0.58470176<br/> C,4.0629596534,-1.3562085097,1.8393013881<br/> H,4.0427600325,-2.4364604877,1.7244092555<br/> C,3.4958257869,-0.5246618615,0.868905233<br/> C,1.0543536814,-0.6162433123,-0.7265592326<br/> C,-1.5706346074,-4.8203747788,1.6574379942<br/> H,-0.6762200515,-5.3797969808,1.929300321<br/> C,3.5136211929,0.8851848853,1.0294358241<br/> C,-2.6993062837,-3.1857687874,0.2684270829<br/> C,-3.8599542129,-3.3784303295,1.0236872849<br/> H,-4.7622800413,-2.8152415782,0.8049039062<br/> C,-2.7367174629,-5.0246079052,2.3965942765<br/> C,4.6558021237,-0.8046345485,2.9768765671<br/> H,5.0890462847,-1.4616982994,3.7262740068<br/> C,4.6842030637,0.5748131671,3.1548237687<br/> C,4.1047520824,1.4019723708,2.190650871<br/> H,4.1142715893,2.4791252951,2.3538514916<br/> C,-3.8758287114,-4.2926207326,2.0796336984<br/> H,-4.7869482671,-4.4236187306,2.6574018351<br/> C,-3.9631591018,3.2570074899,1.5063243134<br/> H,-4.9198877205,2.7466755363,1.6118133991<br/> H,-0.5521795202,5.0556073849,1.2476289329<br/> H,-2.1464640211,5.7020474255,2.9973479903<br/> H,3.8766066418,-6.7843864994,-0.1222475994<br/> H,5.1466135282,1.0037462647,4.0395454994<br/> H,-2.7515635403,-5.7391226717,3.2147115387<br/> H,-4.3555709276,4.5738829151,3.1726147355<br/> H,-8.1026810819,-0.243219202,-1.2459376275<br/> H,3.4949358239,6.9187555754,-0.2802282849<br/> O,5.3586764019,0.2523046539,-2.7300272977<br/> C,4.5508985167,0.9602117878,-2.3145821309<br/> O,3.7765718068,1.7629080092,-1.9387879471<br/> Al,2.4242516575,1.9231980571,-0.229861814<br/> Al,-3.2561935189,1.2140983883,-0.5116258707<br/> Al,0.1313329215,-3.2973279946,-0.2223765529 </p> |
|--|----------------------------------------------------------------------------------------------------------------------------------------------------------------------------------------------------------------------------------------------------------------------------------------------------------------------------------------------------------------------------------------------------------------------------------------------------------------------------------------------------------------------------------------------------------------------------------------------------------------------------------------------------------------------------------------------------------------------------------------------------------------------------------------------------------------------------------------------------------------------------------------------------------------------------------------------------------------------------------------------------------------------------------------------------------------------------------------------------------------------------------------------------------------------------------------------------------------------------------------------------------------------------------------------------------------------------------------------------------------------------------------------------------------------------------------------------------------------------------------------------------------------------------------------------------------------------------------------------------------------------------------------------------------------------------------------------------------------------------------------------------------------------------------------------------------------------------------------------------------------------------------------------------------------------------------------------------------------------------------------------------------------------------------------------------------------|

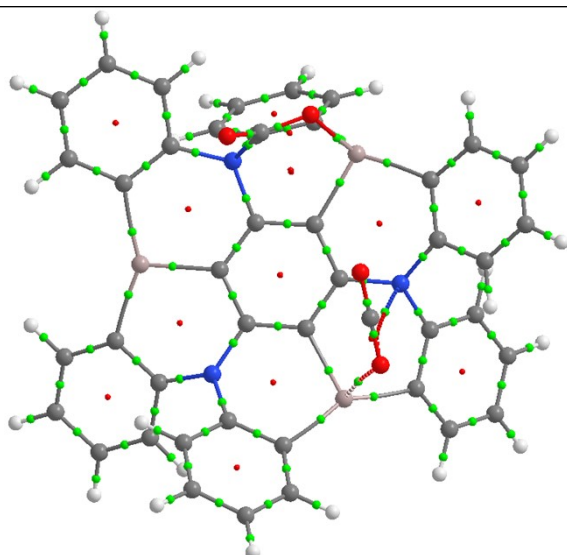

**1CO<sub>2</sub>-Al<sub>3</sub>N<sub>3</sub>:CO<sub>2</sub>**

**E=-2883,5211933H; FreqIm=0**

C,-2.2259447677,5.8877197808,1.8854194627  
 C,-0.6023548911,3.8521307549,0.7797984624  
 C,-2.0118034374,3.806673914,0.6059192384  
 C,-0.0472432463,4.901837158,1.5392238044  
 C,-0.841652037,5.9012912958,2.0771683112  
 C,-1.1735176596,0.9873803714,0.0219335699  
 C,-4.1502606826,0.9946713798,-0.5126511608  
 C,-1.2874690829,-0.396186669,-0.0205978954  
 C,1.2635075774,4.680172933,-1.1503036788  
 H,0.2375942102,4.9936815544,-1.3206513673  
 C,1.50954121,3.5418025775,-0.3597042093  
 C,0.1313335861,1.50133669,0.2005613199  
 C,-5.4495085283,1.4396991799,-0.8362068155  
 H,-5.6691630123,2.5037016635,-0.7749716659  
 C,2.8462577551,3.1074537948,-0.1688918481  
 C,-3.90666285,-0.38398551,-0.6047705296  
 C,-4.9206004517,-1.2618236221,-1.0081876594  
 H,-4.7197521891,-2.329400441,-1.0640152056  
 C,-6.4596309363,0.5758292211,-1.23123661  
 C,2.3034115507,5.4131139826,-1.7026656791  
 H,2.0772009164,6.2865232252,-2.3079590704  
 C,3.6267200648,5.0221997073,-1.4933470031  
 C,3.8731188195,3.8734415115,-0.7520646321  
 H,4.9052051451,3.5527282612,-0.620786619  
 C,-6.1843661261,-0.7900985002,-1.3208844086  
 H,-6.9534919037,-1.4892677306,-1.6341999318  
 C,1.235127038,0.650936939,0.3411452133  
 C,2.7875125431,-5.4007945791,-1.3532172214  
 C,2.2493217391,-2.9130720735,-0.1416523005  
 C,1.1916720907,-3.8441910229,-0.3109632172  
 C,1.5074601756,-5.0720510751,-0.9227977203  
 H,0.7128482724,-5.8013649758,-1.071337248  
 C,3.538731654,-3.237105224,-0.6061615924  
 H,4.3430725868,-2.5161014193,-0.478204346  
 C,3.8077593025,-4.4628298457,-1.1976009249  
 H,4.8147318299,-4.6798155316,-1.5433230125  
 C,-0.2397824024,-1.2882747192,0.1102762924  
 C,-2.1698297111,-3.1698410858,1.1865501258  
 C,3.5470372996,-2.369146252,2.3179942462  
 H,3.0090248981,-3.3111124206,2.2611519778  
 C,3.1964008172,-1.3252181287,1.4454834571  
 C,1.0267234634,-0.7395512825,0.3189293973  
 C,-2.5069344788,-3.9288926593,2.3140615469  
 H,-1.9429393508,-4.8347531535,2.5252233517  
 C,3.8804999867,-0.0865179721,1.5256036102  
 C,-2.9318747246,-2.0097356307,0.9551598749  
 C,-3.9297186492,-1.5961018866,1.84009606  
 H,-4.4897566704,-0.6824470521,1.6777724531  
 C,-3.5234554286,-3.5545927422,3.1907360609  
 C,4.5723983147,-2.2136091602,3.2403801165  
 H,4.8204875364,-3.0363112662,3.9052261916  
 C,5.2689390482,-1.007107304,3.3220053298  
 C,4.9057064464,0.0366284907,2.4788028342  
 H,5.4387940468,0.9820039115,2.560743187

|                                                                                    |                                                                                                                                                                                                                                                                                                                                                                                                                                                                                                                                                                                                                                                                                                                                                                                                                                                                                                                                                                                                                                                                                                                                                                                                                                                                                   |
|------------------------------------------------------------------------------------|-----------------------------------------------------------------------------------------------------------------------------------------------------------------------------------------------------------------------------------------------------------------------------------------------------------------------------------------------------------------------------------------------------------------------------------------------------------------------------------------------------------------------------------------------------------------------------------------------------------------------------------------------------------------------------------------------------------------------------------------------------------------------------------------------------------------------------------------------------------------------------------------------------------------------------------------------------------------------------------------------------------------------------------------------------------------------------------------------------------------------------------------------------------------------------------------------------------------------------------------------------------------------------------|
|                                                                                    | <p>C,-4.220541264,-2.3736604055,2.9591576444<br/> H,-4.9967409591,-2.0458107074,3.6440686104<br/> C,-2.7865117479,4.8387079892,1.1721835352<br/> H,-3.8676828049,4.8127934695,1.0473055456<br/> H,1.0265549117,4.9253602899,1.6987540741<br/> H,-0.3779113848,6.6911478452,2.6614986218<br/> O,-2.5622255453,-1.273149526,-2.6862657857<br/> C,-2.2521468341,-1.9263712681,-1.7475261241<br/> O,-1.7002944806,-3.0328646459,-1.5540175747<br/> O,3.5921967023,0.2876618356,-1.5434553062<br/> C,2.7904624769,-0.3370797926,-2.135783773<br/> O,2.0238026084,-0.9385672729,-2.7506013015<br/> H,-7.4480972528,0.955341573,-1.4719625338<br/> H,4.4464202261,5.5930975607,-1.9194590697<br/> H,-2.8504184506,6.6717384456,2.3028066209<br/> H,6.0733493925,-0.8820238749,4.0408884998<br/> H,-3.7554607669,-4.167230232,4.057353671<br/> H,2.9859986464,-6.3635551016,-1.8149204234<br/> Al,3.0154181669,1.2939549778,0.4845001863<br/> Al,-2.6542792502,2.1257774335,-0.0548249829<br/> Al,-0.6136278853,-3.1724827739,-0.013667473<br/> N,2.1515664709,-1.6136258997,0.486949728<br/> N,0.3368567003,2.9228350078,0.2166974797<br/> N,-2.6385233834,-1.1083322895,-0.249796792</p>                                                                                                |
| 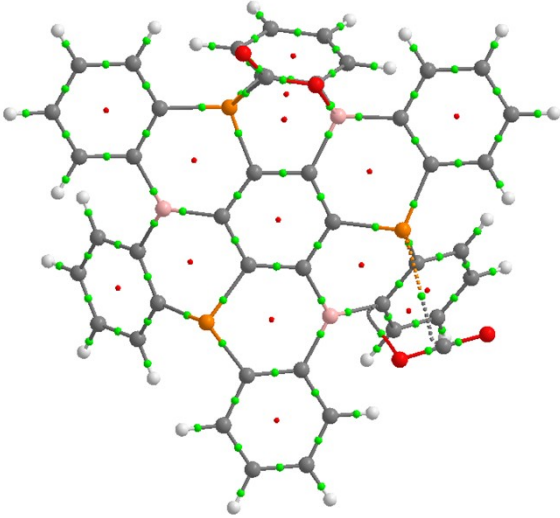 | <p><b>1CO<sub>2</sub>-B<sub>3</sub>P<sub>3</sub>:CO<sub>2</sub></b><br/> <b>E=-3090,65678173H; FreqIm=0</b><br/> C,0,-3.133258,4.883517,2.004378<br/> C,0,-1.163562,3.933814,0.248268<br/> C,0,-2.392716,3.228989,0.359505<br/> C,0,-0.952884,5.101637,0.983112<br/> C,0,-1.928659,5.568801,1.862361<br/> P,0,-2.916998,-1.278648,-0.406191<br/> P,0,0.044736,3.344702,-1.00835<br/> C,0,-1.329912,1.007858,-0.648695<br/> C,0,-4.039822,1.225035,-0.573891<br/> C,0,-1.383755,-0.38626,-0.604111<br/> C,0,2.044139,5.209015,-0.695277<br/> H,0,1.273362,5.91266,-1.003892<br/> C,0,1.724187,3.853962,-0.522246<br/> C,0,-0.026759,1.566539,-0.67949<br/> C,0,-5.135385,2.060858,-0.842964<br/> H,0,-4.985411,3.137091,-0.856224<br/> C,0,2.73494,2.915328,-0.201398<br/> C,0,-4.298801,-0.168556,-0.612132<br/> C,0,-5.564432,-0.695071,-0.878286<br/> H,0,-5.712378,-1.771017,-0.922351<br/> C,0,-6.403309,1.549139,-1.119133<br/> B,0,-2.601503,1.844895,-0.335723<br/> C,0,3.34638,5.662007,-0.519031<br/> H,0,3.574887,6.716566,-0.644687<br/> C,0,4.360652,4.75007,-0.226492<br/> C,0,4.051472,3.403274,-0.082152<br/> H,0,4.854861,2.696274,0.106649<br/> C,0,-6.624525,0.173864,-1.126646<br/> H,0,-7.610894,-0.223661,-1.343994<br/> B,0,2.450944,1.383291,-0.055373</p> |



|                                   |
|-----------------------------------|
| C,0,1.12048,0.758274,-0.587547    |
| C,0,1.484805,-6.114166,-0.331481  |
| C,0,1.998109,-3.369516,-0.485789  |
| C,0,0.661094,-3.806642,-0.39627   |
| C,0,0.442895,-5.192985,-0.324481  |
| H,0,-0.583605,-5.551862,-0.266895 |
| C,0,3.050016,-4.300696,-0.537004  |
| H,0,4.072349,-3.954633,-0.685004  |
| C,0,2.801458,-5.664018,-0.436071  |
| H,0,3.626021,-6.370647,-0.465665  |
| P,0,2.480599,-1.635345,-0.813634  |
| C,0,-0.292277,-1.262115,-0.608581 |
| C,0,-1.480669,-2.929176,1.041347  |
| C,0,4.097983,-1.782606,1.520218   |
| H,0,4.103407,-2.859728,1.380308   |
| C,0,3.363004,-0.965559,0.659274   |
| C,0,0.963929,-0.655603,-0.630563  |
| C,0,-1.139074,-3.657302,2.184552  |
| H,0,-0.215828,-4.231952,2.191006  |
| C,0,3.347399,0.443022,0.836438    |
| C,0,-2.684714,-2.200721,1.117961  |
| C,0,-3.529727,-2.188481,2.224096  |
| H,0,-4.448079,-1.605845,2.222782  |
| C,0,-1.963028,-3.661549,3.3136    |
| B,0,-0.60854,-2.835789,-0.358217  |
| C,0,4.791199,-1.229301,2.595464   |
| H,0,5.339486,-1.879139,3.272057   |
| C,0,4.760191,0.14571,2.814268     |
| C,0,4.047065,0.962658,1.940845    |
| H,0,4.008673,2.031131,2.136044    |
| C,0,-3.155387,-2.937338,3.338529  |
| H,0,-3.78685,-2.950194,4.22164    |
| C,0,-3.353815,3.730924,1.257034   |
| H,0,-4.284882,3.186764,1.394237   |
| H,0,-0.009898,5.635068,0.906044   |
| H,0,-1.736777,6.462872,2.449221   |
| O,0,-3.618451,-2.914285,-2.468856 |
| C,0,-2.74211,-2.683577,-1.674154  |
| O,0,-1.616204,-3.287146,-1.489618 |
| O,0,4.421058,0.817573,-2.150684   |
| C,0,5.085128,-0.125987,-1.989083  |
| O,0,5.773793,-1.049023,-1.833358  |
| H,0,-7.222065,2.229656,-1.334111  |
| H,0,5.388496,5.087275,-0.129789   |
| H,0,-3.88938,5.239675,2.697473    |
| H,0,5.282965,0.578732,3.662043    |
| H,0,-1.671052,-4.238528,4.186898  |
| H,0,1.273804,-7.178533,-0.274173  |

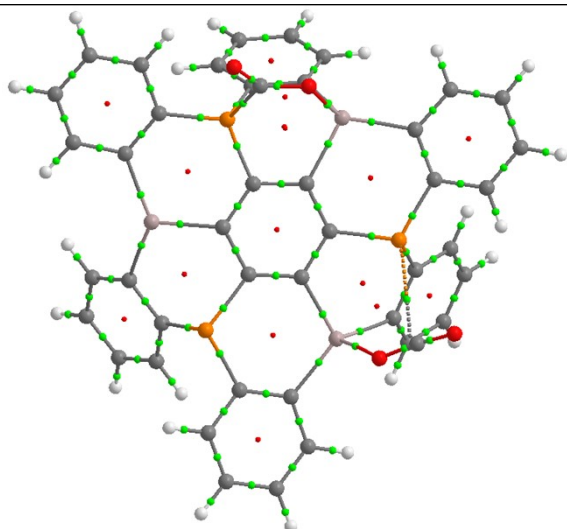

**1CO<sub>2</sub>-Al<sub>3</sub>P<sub>3</sub>:CO<sub>2</sub>**

**E=-3743,3636713H; FreqIm=0**

C,-2.4963847087,5.4019541294,2.2498338854  
 C,-0.870848613,4.0980778813,0.3519045568  
 C,-2.25035691,3.7673887161,0.4507860996  
 C,-0.3346668511,5.0583577435,1.2148982267  
 C,-1.1422881348,5.7039321258,2.154076774  
 P,-2.9418588394,-1.2757687406,-0.5380222615  
 P,0.118815786,3.370241327,-1.0631136075  
 C,-1.2433509653,0.9949782264,-0.7243676642  
 C,-4.4616622432,1.1255719649,-0.5711927062  
 C,-1.3427630627,-0.3948167093,-0.6266990135  
 C,1.8786673302,5.4344038843,-1.0951038142  
 H,0.9886433311,5.9488174328,-1.4549948091  
 C,1.8128573402,4.0641038046,-0.7849188639  
 C,0.0689214777,1.5376749538,-0.7291622323  
 C,-5.714063391,1.7557063348,-0.6526889809  
 H,-5.7775972876,2.8369722324,-0.5431833368  
 C,2.9805367666,3.3830307968,-0.3706688197  
 C,-4.4451391664,-0.2819482669,-0.7267969601  
 C,-5.6195594991,-1.0096186487,-0.9579525069  
 H,-5.5828860047,-2.0873358268,-1.0896279866  
 C,-6.8886278296,1.0393784462,-0.8792485311  
 C,3.0593863271,6.151809137,-0.9386641579  
 H,3.0816938691,7.2129601212,-1.170704821  
 C,4.2118371141,5.5010786985,-0.4988109585  
 C,4.1628818682,4.1349580523,-0.2377105617  
 H,5.0793235124,3.634793342,0.0753927452  
 C,-6.8400980815,-0.3439239898,-1.0354216851  
 H,-7.7486956666,-0.908062407,-1.2220877965  
 C,1.2012072026,0.7137480193,-0.6747323587  
 C,2.3260281732,-6.3011016445,-0.3926319295  
 C,2.2933888869,-3.4968223636,-0.5228775383  
 C,1.0682056933,-4.1906839269,-0.3754698601  
 C,1.1284475555,-5.5957220837,-0.3148469809  
 H,0.2035321498,-6.1615829462,-0.2082789904  
 C,3.4979014034,-4.213918188,-0.6391722091  
 H,4.4338168768,-3.677014261,-0.7910982983  
 C,3.520330402,-5.6015999263,-0.5588641187  
 H,4.4644632313,-6.1330515063,-0.6397712122  
 P,2.5783154231,-1.677291924,-0.6847429361  
 C,-0.252983902,-1.2866769787,-0.5703176753  
 C,-1.9450884769,-3.1663793822,1.1906444558  
 C,3.818897344,-2.1072622609,1.8654415068  
 H,3.5379687812,-3.1524825105,1.7694077245  
 C,3.4393546463,-1.1786994537,0.8925556274  
 C,1.0095841328,-0.6931181623,-0.6002924288  
 C,-1.9666431548,-3.8812959536,2.3950111564  
 H,-1.1911939371,-4.6198783869,2.590022552  
 C,3.7924718707,0.1901446182,1.02635754  
 C,-2.981684613,-2.2201573206,1.020221065  
 C,-3.9811903612,-1.9950930502,1.9705114263  
 H,-4.7618842963,-1.2571160354,1.8009691627  
 C,-2.9555675107,-3.6767508014,3.3602888781  
 C,4.5548384588,-1.6965915372,2.9787482066  
 H,4.8401499546,-2.4273606257,3.7308673448

|                                                                                    |                                                                                                                                                                                                                                                                                                                                                                                                                                                                                                                                                                                                                                                                                                                                                                                                                                                                                                                                                                                                                                                                                                                                                                                                                             |
|------------------------------------------------------------------------------------|-----------------------------------------------------------------------------------------------------------------------------------------------------------------------------------------------------------------------------------------------------------------------------------------------------------------------------------------------------------------------------------------------------------------------------------------------------------------------------------------------------------------------------------------------------------------------------------------------------------------------------------------------------------------------------------------------------------------------------------------------------------------------------------------------------------------------------------------------------------------------------------------------------------------------------------------------------------------------------------------------------------------------------------------------------------------------------------------------------------------------------------------------------------------------------------------------------------------------------|
|                                                                                    | <p>C,4.9125822101,-0.3605711445,3.1301106495<br/> C,4.518874717,0.5678050828,2.1642454231<br/> H,4.7867550281,1.614198191,2.3076335653<br/> C,-3.961863645,-2.7354326321,3.1512077767<br/> H,-4.7290409317,-2.574569968,3.9027897045<br/> C,-3.0329680511,4.4247081787,1.4111781568<br/> H,-4.0875159052,4.1711534255,1.5133647129<br/> H,0.7205878557,5.3096733517,1.1718179583<br/> H,-0.7006160139,6.4433908105,2.81671611<br/> O,-3.7168417465,-2.6904534642,-2.7197153978<br/> C,-2.8534190914,-2.6578246662,-1.8785374762<br/> O,-1.8492334839,-3.4407994705,-1.7031985794<br/> O,4.1179857509,0.953393654,-1.9665035644<br/> C,4.6404985222,-0.0207321854,-2.376519279<br/> O,5.2289990035,-0.8947040873,-2.8391686735<br/> H,-7.840072269,1.5601585785,-0.9395283018<br/> H,5.1409432551,6.0514469142,-0.3791145127<br/> H,-3.1246118978,5.9102631489,2.9756062274<br/> H,5.4864262633,-0.0415323022,3.9958571305<br/> H,-2.941273208,-4.2536075292,4.2812944209<br/> H,2.3288412288,-7.386360957,-0.3389482647<br/> Al,2.9504215534,1.4436518512,-0.2269193874<br/> Al,-2.7809433446,2.1094531887,-0.3939852252<br/> Al,-0.6213082021,-3.208344139,-0.3154884963</p>                                               |
| 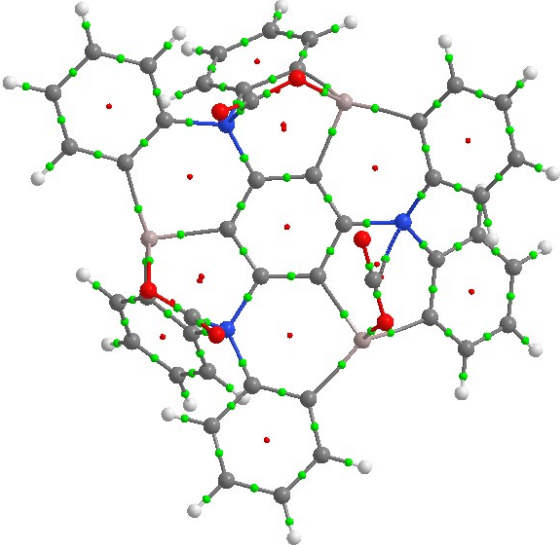 | <p><b>2CO<sub>2</sub>-Al<sub>3</sub>N<sub>3</sub>:CO<sub>2</sub></b><br/> <b>E-3072,11172002H; FreqIm=0</b><br/> C,-5.37949,1.695833,2.753099<br/> C,-3.138505,1.840735,1.058773<br/> C,-3.967249,0.691428,1.02189<br/> C,-3.43426,2.882313,1.95325<br/> C,-4.543223,2.812657,2.785214<br/> C,-1.342807,-0.326322,0.028154<br/> C,-3.197379,-2.657902,-0.349437<br/> C,-0.324087,-1.244256,-0.099628<br/> C,-3.05353,3.871445,-0.913117<br/> H,-3.949928,3.255344,-0.898318<br/> C,-1.862846,3.358137,-0.363745<br/> C,-0.962744,1.035166,0.101532<br/> C,-4.359572,-3.433206,-0.549968<br/> H,-5.330923,-2.951531,-0.454773<br/> C,-0.683826,4.149155,-0.38843<br/> C,-1.970192,-3.324226,-0.478865<br/> C,-1.919024,-4.68406,-0.810756<br/> H,-0.956117,-5.181393,-0.906449<br/> C,-4.321185,-4.783045,-0.866582<br/> C,-3.113195,5.150013,-1.447093<br/> H,-4.049598,5.513881,-1.860952<br/> C,-1.972926,5.953098,-1.459325<br/> C,-0.788089,5.437406,-0.94796<br/> H,0.102254,6.062769,-0.987132<br/> C,-3.081818,-5.410289,-1.004528<br/> H,-3.019104,-6.462786,-1.26308<br/> C,0.369225,1.420375,0.01153<br/> C,6.335703,-1.265428,-1.136264<br/> C,3.91838,0.020937,-0.569666<br/> C,3.932956,-1.38365,-0.608347</p> |

|  |                                                                                                                                                                                                                                                                                                                                                                                                                                                                                                                                                                                                                                                                                                                                                                                                                                                                                                                                                                                                                                                                                                                                                                                                                                                                                                                                                                                                                                                                                                                                                                                                                                                                                                                                             |
|--|---------------------------------------------------------------------------------------------------------------------------------------------------------------------------------------------------------------------------------------------------------------------------------------------------------------------------------------------------------------------------------------------------------------------------------------------------------------------------------------------------------------------------------------------------------------------------------------------------------------------------------------------------------------------------------------------------------------------------------------------------------------------------------------------------------------------------------------------------------------------------------------------------------------------------------------------------------------------------------------------------------------------------------------------------------------------------------------------------------------------------------------------------------------------------------------------------------------------------------------------------------------------------------------------------------------------------------------------------------------------------------------------------------------------------------------------------------------------------------------------------------------------------------------------------------------------------------------------------------------------------------------------------------------------------------------------------------------------------------------------|
|  | C,5.176582,-1.98779,-0.89504<br>H,5.230343,-3.074138,-0.933519<br>C,5.081541,0.759791,-0.823637<br>H,5.048235,1.846535,-0.790233<br>C,6.280953,0.128407,-1.104122<br>H,7.167347,0.724048,-1.299401<br>C,1.034403,-0.932202,-0.164946<br>C,1.466998,-3.561073,1.003987<br>C,3.956403,1.133875,1.940146<br>H,4.393006,0.159135,1.756013<br>C,3.087271,1.726808,1.023036<br>C,1.317769,0.411282,-0.117794<br>C,1.981851,-4.233314,2.119403<br>H,3.060652,-4.316001,2.232495<br>C,2.466246,2.964267,1.279994<br>C,0.066616,-3.485201,0.90387<br>C,-0.77404,-3.987902,1.898211<br>H,-1.851267,-3.885994,1.835254<br>C,1.161728,-4.780591,3.103975<br>C,4.273144,1.806654,3.11842<br>H,4.950593,1.34089,3.827797<br>C,3.725465,3.058443,3.378452<br>C,2.825351,3.610968,2.46926<br>H,2.371192,4.571394,2.702998<br>C,-0.21799,-4.63702,2.998419<br>H,-0.874825,-5.02684,3.770124<br>C,-5.073203,0.651564,1.888025<br>H,-5.71764,-0.225833,1.882178<br>H,-2.787046,3.754093,1.984937<br>H,-4.748128,3.631103,3.46969<br>O,-0.654283,-2.82319,-2.693594<br>C,0.13201,-2.970672,-1.816539<br>O,1.365267,-3.21067,-1.756266<br>O,2.142744,3.015228,-1.479424<br>C,2.59437,1.863564,-1.694846<br>O,2.90809,1.246919,-2.657432<br>O,-3.446999,0.10943,-1.985483<br>C,-2.575823,0.717291,-2.503518<br>O,-1.754327,1.308289,-3.045026<br>H,-2.006277,6.955897,-1.874939<br>H,-6.248549,1.638757,3.401843<br>H,-5.240631,-5.342273,-1.011785<br>H,1.595101,-5.294589,3.957228<br>H,7.26922,-1.775951,-1.353854<br>H,3.979339,3.588925,4.291907<br>Al,-3.192121,-0.744653,-0.013333<br>Al,2.279076,-2.384252,-0.339181<br>Al,1.001894,3.241918,-0.004382<br>N,-1.993425,2.030168,0.195463<br>N,2.754383,0.932409,-0.245377<br>N,-0.58867,-2.75164,-0.271158 |
|--|---------------------------------------------------------------------------------------------------------------------------------------------------------------------------------------------------------------------------------------------------------------------------------------------------------------------------------------------------------------------------------------------------------------------------------------------------------------------------------------------------------------------------------------------------------------------------------------------------------------------------------------------------------------------------------------------------------------------------------------------------------------------------------------------------------------------------------------------------------------------------------------------------------------------------------------------------------------------------------------------------------------------------------------------------------------------------------------------------------------------------------------------------------------------------------------------------------------------------------------------------------------------------------------------------------------------------------------------------------------------------------------------------------------------------------------------------------------------------------------------------------------------------------------------------------------------------------------------------------------------------------------------------------------------------------------------------------------------------------------------|

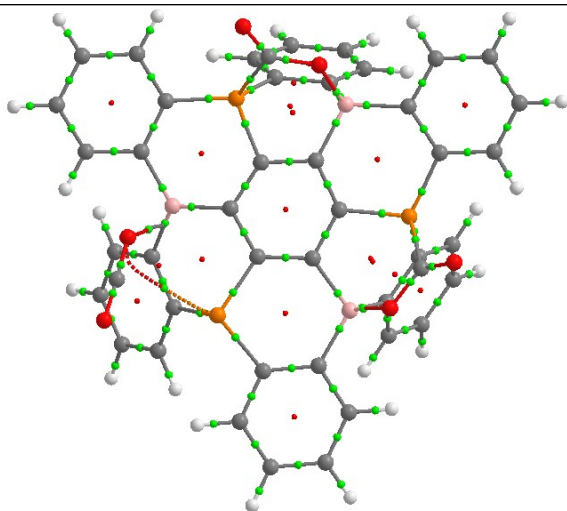

**2CO<sub>2</sub>-B<sub>3</sub>P<sub>3</sub>:CO<sub>2</sub>**

**E=-3279,25615546H; FreqIm=0**

C,0,-5.109456,-0.573139,2.731955  
 C,0,-3.659121,0.728835,0.707814  
 C,0,-3.523433,-0.680817,0.869147  
 C,0,-4.526707,1.445306,1.535701  
 C,0,-5.238804,0.801602,2.546189  
 P,0,0.262514,-3.087492,-0.201024  
 P,0,-2.804449,1.527822,-0.719159  
 C,0,-1.210258,-0.707317,-0.427402  
 C,0,-2.485866,-3.081731,-0.057774  
 C,0,0.028597,-1.349948,-0.476086  
 C,0,-3.60418,4.133683,-0.384669  
 H,0,-4.597086,3.702112,-0.500527  
 C,0,-2.473479,3.298244,-0.378689  
 C,0,-1.203463,0.702932,-0.551458  
 C,0,-3.715172,-3.753129,-0.14257  
 H,0,-4.632005,-3.171,-0.101424  
 C,0,-1.175226,3.854629,-0.347458  
 C,0,-1.328279,-3.897715,-0.163553  
 C,0,-1.392821,-5.284604,-0.318831  
 H,0,-0.480854,-5.867889,-0.418806  
 C,0,-3.794622,-5.135709,-0.306033  
 B,0,-2.458702,-1.498162,0.067203  
 C,0,-3.475192,5.513838,-0.288087  
 H,0,-4.360551,6.143245,-0.282627  
 C,0,-2.201442,6.079975,-0.237098  
 C,0,-1.082547,5.255135,-0.279889  
 H,0,-0.090777,5.704416,-0.266856  
 C,0,-2.636781,-5.906566,-0.383414  
 H,0,-2.69886,-6.982366,-0.513349  
 B,0,0.188462,3.012587,-0.373105  
 C,0,-0.002206,1.417019,-0.588896  
 C,0,6.381214,-0.856727,-1.204325  
 C,0,4.100308,0.638932,-0.758535  
 C,0,3.97422,-0.772467,-0.758988  
 C,0,5.158466,-1.488092,-0.989874  
 H,0,5.108088,-2.574639,-1.010081  
 C,0,5.323224,1.289198,-0.981154  
 H,0,5.368199,2.375694,-1.006955  
 C,0,6.469582,0.536092,-1.199337  
 H,0,7.419318,1.030344,-1.377763  
 P,0,2.649078,1.662696,-0.53528  
 C,0,1.264527,-0.714441,-0.599566  
 C,0,2.535638,-2.373614,0.957048  
 C,0,3.285067,2.653793,2.057291  
 H,0,4.252566,2.15886,2.010456  
 C,0,2.392,2.580184,0.992666  
 C,0,1.179351,0.665259,-0.631966  
 C,0,3.481359,-2.323342,1.982612  
 H,0,4.378621,-1.722269,1.849639  
 C,0,1.119823,3.190574,0.979792  
 C,0,1.395218,-3.169684,1.201841  
 C,0,1.191143,-3.895065,2.371243  
 H,0,0.294299,-4.494588,2.509327  
 C,0,3.298218,-3.036148,3.171819

|                                                                                     |                                                                                                                                                                                                                                                                                                                                                                                                                                                                                                                                                                                                                                                                                                                                                                                                                                                                                                                                                                                                                                                                                                                                                                                                                                                                                                                                                                                                                                                           |
|-------------------------------------------------------------------------------------|-----------------------------------------------------------------------------------------------------------------------------------------------------------------------------------------------------------------------------------------------------------------------------------------------------------------------------------------------------------------------------------------------------------------------------------------------------------------------------------------------------------------------------------------------------------------------------------------------------------------------------------------------------------------------------------------------------------------------------------------------------------------------------------------------------------------------------------------------------------------------------------------------------------------------------------------------------------------------------------------------------------------------------------------------------------------------------------------------------------------------------------------------------------------------------------------------------------------------------------------------------------------------------------------------------------------------------------------------------------------------------------------------------------------------------------------------------------|
|                                                                                     | <p>B,0,2.611304,-1.598847,-0.492001<br/> C,0,2.898273,3.369316,3.189981<br/> H,0,3.569431,3.445542,4.040091<br/> C,0,1.643882,3.977771,3.225295<br/> C,0,0.76882,3.888385,2.138576<br/> H,0,-0.203591,4.372576,2.192335<br/> C,0,2.163312,-3.821251,3.369313<br/> H,0,2.031256,-4.370377,4.296461<br/> C,0,-4.261503,-1.295223,1.898499<br/> H,0,-4.144321,-2.362827,2.067942<br/> H,0,-4.622228,2.521242,1.423535<br/> H,0,-5.885318,1.382267,3.198543<br/> O,0,1.271197,-4.47036,-2.32993<br/> C,0,1.477761,-3.541733,-1.592787<br/> O,0,2.493483,-2.734108,-1.563887<br/> O,0,1.09285,3.527739,-1.553405<br/> C,0,2.26932,3.038799,-1.7929<br/> O,0,3.064939,3.358263,-2.63868<br/> O,0,-3.857358,-1.205744,-2.278438<br/> C,0,-4.61627,-0.387236,-2.619173<br/> O,0,-5.398938,0.391146,-2.976537<br/> H,0,-2.083774,7.158855,-0.184854<br/> H,0,-5.65673,-1.075031,3.524213<br/> H,0,-4.767494,-5.613093,-0.378669<br/> H,0,4.051271,-2.979024,3.952983<br/> H,0,7.271327,-1.453257,-1.384356<br/> H,0,1.342376,4.529612,4.111593</p>                                                                                                                                                                                                                                                                                                                                                                                                                 |
| 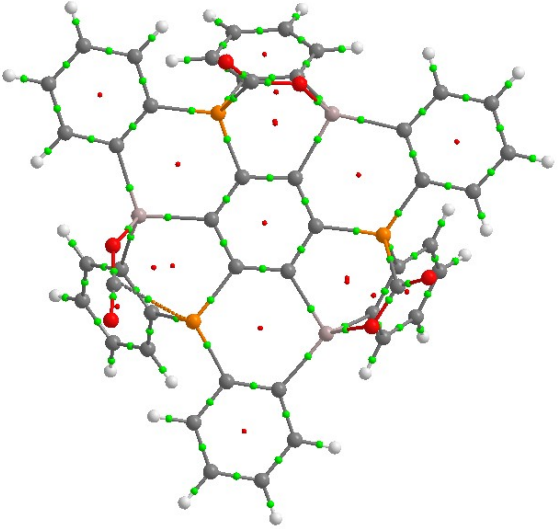 | <p><b>2CO<sub>2</sub>-Al<sub>3</sub>P<sub>3</sub>:CO<sub>2</sub></b><br/> <b>E=-3932,00000887H; FreqIm=0</b><br/> C,-4.465251135,2.784717537,3.0781412981<br/> C,-2.6929344455,2.7924640055,0.9048231144<br/> C,-3.6161776175,1.7203903548,1.0465227905<br/> C,-2.6667019795,3.827291207,1.8430854517<br/> C,-3.5512211182,3.8218951946,2.9236269459<br/> P,-1.4930466261,-2.7551342321,-0.2864287749<br/> P,-1.6386000221,2.8145238089,-0.6353639951<br/> C,-1.4072920341,0.0771924124,-0.4317397932<br/> C,-4.1064781542,-1.6357071098,-0.1481896291<br/> C,-0.6958634512,-1.1235481965,-0.3927045986<br/> C,-1.3744510787,5.5031687698,-0.6428189477<br/> H,-2.4537719293,5.4225146909,-0.7681559315<br/> C,-0.5972786637,4.3377378525,-0.5149373524<br/> C,-0.6397398573,1.2682459949,-0.4539454432<br/> C,-5.4951948805,-1.8465231609,-0.1191678687<br/> H,-6.1614303278,-0.9934182576,0.002716671<br/> C,0.812624651,4.4338840584,-0.4047727707<br/> C,-3.3024620374,-2.7902661122,-0.3090387878<br/> C,-3.8608885973,-4.0690483037,-0.4504447691<br/> H,-3.221822459,-4.9364957961,-0.5945480703<br/> C,-6.0614926561,-3.113838303,-0.2480167282<br/> C,-0.7929029153,6.7653200418,-0.6078091847<br/> H,-1.4159415861,7.6508536537,-0.6969475926<br/> C,0.5896358954,6.8818077991,-0.4758508015<br/> C,1.3648188336,5.7288796866,-0.3879323205<br/> H,2.4456412252,5.8415270302,-0.3092407128<br/> C,-5.2423776577,-4.2278425364,-0.4195805192</p> |

|  |                                                                                                                                                                                                                                                                                                                                                                                                                                                                                                                                                                                                                                                                                                                                                                                                                                                                                                                                                                                                                                                                                                                                                                                                                                                                                                                                                                                                                                                                                                                                                                                                                                                                                                                                                                                                                                                                                                                                                                                                                                                                                                                                                                                                                                                                                                                                                                                                                                                                                                                                                                                                                                               |
|--|-----------------------------------------------------------------------------------------------------------------------------------------------------------------------------------------------------------------------------------------------------------------------------------------------------------------------------------------------------------------------------------------------------------------------------------------------------------------------------------------------------------------------------------------------------------------------------------------------------------------------------------------------------------------------------------------------------------------------------------------------------------------------------------------------------------------------------------------------------------------------------------------------------------------------------------------------------------------------------------------------------------------------------------------------------------------------------------------------------------------------------------------------------------------------------------------------------------------------------------------------------------------------------------------------------------------------------------------------------------------------------------------------------------------------------------------------------------------------------------------------------------------------------------------------------------------------------------------------------------------------------------------------------------------------------------------------------------------------------------------------------------------------------------------------------------------------------------------------------------------------------------------------------------------------------------------------------------------------------------------------------------------------------------------------------------------------------------------------------------------------------------------------------------------------------------------------------------------------------------------------------------------------------------------------------------------------------------------------------------------------------------------------------------------------------------------------------------------------------------------------------------------------------------------------------------------------------------------------------------------------------------------------|
|  | <p> H,-5.6740959917,-5.2172809456,-0.5341791343<br/> C,0.7564025806,1.2570523509,-0.4554532492<br/> C,5.7039983672,-3.7410408221,-1.0004434806<br/> C,4.0747685877,-1.5098205041,-0.696290678<br/> C,3.4702061139,-2.7907319712,-0.6285536504<br/> C,4.3345114116,-3.8875397779,-0.7858955986<br/> H,3.924740193,-4.8955527437,-0.7482280614<br/> C,5.4512207758,-1.3504683827,-0.9198292399<br/> H,5.8866131985,-0.356896039,-0.9918950633<br/> C,6.2649676098,-2.468039033,-1.0695771857<br/> H,7.3282245038,-2.3409966751,-1.2482306976<br/> P,3.1920874467,0.0603844887,-0.490531061<br/> C,0.7086248277,-1.2305604649,-0.4301196974<br/> C,0.5786120957,-3.8209398372,1.2012638315<br/> C,4.5765909869,0.3887275,1.9334631308<br/> H,4.9560700608,-0.6203503081,1.7905595832<br/> C,3.7189538652,0.9727014971,0.9986288012<br/> C,1.3734895416,-0.0107418088,-0.4661478668<br/> C,1.0812390558,-4.4760394553,2.3322037512<br/> H,2.1518332567,-4.6552668768,2.4132674252<br/> C,3.1913085227,2.2785973577,1.1377162475<br/> C,-0.8227346281,-3.6201616598,1.1758180684<br/> C,-1.6724253112,-4.0419148983,2.2012619023<br/> H,-2.7441000261,-3.865611792,2.1488842232<br/> C,0.2500169762,-4.9106345226,3.3676553506<br/> C,4.9387333804,1.1216734385,3.0626905118<br/> H,5.6048169024,0.684081801,3.8004246132<br/> C,4.4406053757,2.4109436441,3.2386406911<br/> C,3.579721235,2.9713828646,2.2914154558<br/> H,3.2023680932,3.978362076,2.4609259011<br/> C,-1.1245174193,-4.6931973761,3.3052756952<br/> H,-1.7710214017,-5.025695149,4.1118921412<br/> C,-4.4792705478,1.7411856725,2.15071883<br/> H,-5.1839686549,0.9233017174,2.2981491285<br/> H,-1.9517498874,4.6395667241,1.7460266866<br/> H,-3.5151606335,4.630815487,3.6483480405<br/> O,-1.5205050021,-4.2876693967,-2.5258061895<br/> C,-0.7597454196,-3.7798819089,-1.7415926765<br/> O,0.5299650462,-3.8311329539,-1.7084352446<br/> O,3.0612696957,2.4352784053,-1.76006494<br/> C,3.6399496599,1.2916734581,-1.9037828832<br/> O,4.4040583604,0.9278628186,-2.7614933092<br/> O,-4.0257411076,0.91044954,-1.9401904337<br/> C,-3.9308086849,1.8998206417,-2.5802048039<br/> O,-3.9512974332,2.8055075812,-3.2865212734<br/> H,1.0585026868,7.861795271,-0.4570207134<br/> H,-5.1550877769,2.78190103,3.9174512869<br/> H,-7.1411160474,-3.2323552105,-0.2212955305<br/> H,0.6767717313,-5.4194506322,4.2279005741<br/> H,6.3323019442,-4.6193395675,-1.1205870718<br/> H,4.7231601779,2.9821415533,4.1190786434<br/> Al,-3.3268451429,0.1717815877,-0.1148467127<br/> Al,1.5264936334,-3.0241349478,-0.3693699955<br/> Al,1.93950584,2.8300860649,-0.3301617524 </p> |
|--|-----------------------------------------------------------------------------------------------------------------------------------------------------------------------------------------------------------------------------------------------------------------------------------------------------------------------------------------------------------------------------------------------------------------------------------------------------------------------------------------------------------------------------------------------------------------------------------------------------------------------------------------------------------------------------------------------------------------------------------------------------------------------------------------------------------------------------------------------------------------------------------------------------------------------------------------------------------------------------------------------------------------------------------------------------------------------------------------------------------------------------------------------------------------------------------------------------------------------------------------------------------------------------------------------------------------------------------------------------------------------------------------------------------------------------------------------------------------------------------------------------------------------------------------------------------------------------------------------------------------------------------------------------------------------------------------------------------------------------------------------------------------------------------------------------------------------------------------------------------------------------------------------------------------------------------------------------------------------------------------------------------------------------------------------------------------------------------------------------------------------------------------------------------------------------------------------------------------------------------------------------------------------------------------------------------------------------------------------------------------------------------------------------------------------------------------------------------------------------------------------------------------------------------------------------------------------------------------------------------------------------------------------|

**Table S3:** Molecular graphs, energies (in Hartree) and Cartesian coordinates (in Å) of the transition states in vacuum. Level of theory: M06-2X/6-311++G\*//M06-2X/6-31+G\*

|  |                                                                                                                                                                                                                                                                                                                                                                                                                                                                                                                                                                                                                                                                                                                                                                                                                                                                                                                                                                                                                                                                                                                                                                                                                                                                                                                                                                                                                                                                                                                                                                                                                                                                                                                                                                                                                                                                                                                                                                                                                                                                                                                                                                                                                                                                                                                                                                                                                                                                                                                                                                                                                   |
|--|-------------------------------------------------------------------------------------------------------------------------------------------------------------------------------------------------------------------------------------------------------------------------------------------------------------------------------------------------------------------------------------------------------------------------------------------------------------------------------------------------------------------------------------------------------------------------------------------------------------------------------------------------------------------------------------------------------------------------------------------------------------------------------------------------------------------------------------------------------------------------------------------------------------------------------------------------------------------------------------------------------------------------------------------------------------------------------------------------------------------------------------------------------------------------------------------------------------------------------------------------------------------------------------------------------------------------------------------------------------------------------------------------------------------------------------------------------------------------------------------------------------------------------------------------------------------------------------------------------------------------------------------------------------------------------------------------------------------------------------------------------------------------------------------------------------------------------------------------------------------------------------------------------------------------------------------------------------------------------------------------------------------------------------------------------------------------------------------------------------------------------------------------------------------------------------------------------------------------------------------------------------------------------------------------------------------------------------------------------------------------------------------------------------------------------------------------------------------------------------------------------------------------------------------------------------------------------------------------------------------|
|  | <p><b>B<sub>3</sub>N<sub>3</sub>-NG/CO<sub>2</sub></b><br/> <b>E= -2042,29937279H; FreqIm=1</b></p> <p>C,5.9623354192,-0.2303782555,1.691468931<br/> C,3.5597406496,-1.1133554794,0.5130405841<br/> C,3.8941039819,0.2646442068,0.4807693589<br/> C,4.4083211051,-2.016828099,1.1821903632<br/> C,5.5908422559,-1.5789159135,1.753279387<br/> C,1.4374887063,0.6802811914,-0.1028518887<br/> C,2.9070808905,2.7539902412,-0.398100935<br/> C,0.2960381477,1.513862906,-0.1270471282<br/> C,3.3489394061,-3.5767597667,-1.0329416542<br/> H,4.282923753,-3.0321074297,-1.1189006771<br/> C,2.2143268391,-2.9443274719,-0.503601545<br/> C,1.2554425508,-0.7188976668,-0.1372932748<br/> C,4.0837303131,3.3715563868,-0.8647753201<br/> H,5.0141594896,2.8114868504,-0.8205070048<br/> C,0.9737729996,-3.6173479636,-0.5067406815<br/> C,1.6950097156,3.4742471563,-0.5057320922<br/> C,1.6822374188,4.7386598711,-1.1180953733<br/> H,0.7426692314,5.2590523274,-1.2692594678<br/> C,4.0799846415,4.6393906106,-1.4234224166<br/> B,2.8251271635,1.262898486,-0.0003640523<br/> C,3.2877868127,-4.8958389027,-1.4639093751<br/> H,4.1814099835,-5.3633867567,-1.8673333563<br/> C,2.0884568514,-5.6044107401,-1.3969691757<br/> C,0.9500208566,-4.9489512491,-0.9436272083<br/> H,-0.0071521517,-5.4673934867,-0.9522860479<br/> C,2.8627846041,5.314114161,-1.5611990251<br/> H,2.8288813465,6.2873487535,-2.0424507356<br/> B,-0.3521297317,-2.7996750139,-0.2539935852<br/> C,-0.0294946518,-1.2692779607,-0.2391207819<br/> C,-5.9649177516,1.1029434447,-0.9635819399<br/> C,-3.6066656178,-0.2857568213,-0.4494896249<br/> C,-3.5803121843,1.1199329313,-0.4073921638<br/> C,-4.7877859201,1.7856845837,-0.6928102978<br/> H,-4.7878774057,2.870757428,-0.7285152565<br/> C,-4.7880139137,-0.9836304061,-0.7113711176<br/> H,-4.7832955308,-2.0691230982,-0.7348844194<br/> C,-5.9656093299,-0.292800888,-0.9562222782<br/> H,-6.8765468229,-0.8450880033,-1.1653132119<br/> C,-1.0109231679,0.9837113674,-0.175692235<br/> C,-1.9451170455,3.293560229,0.355241277<br/> C,-3.4760552691,-2.0437490551,1.817726376<br/> H,-4.247883914,-1.282598032,1.798727019<br/> C,-2.479768477,-2.0966249301,0.8502676659<br/> C,-1.0990231266,-0.4116084095,-0.2383237745<br/> C,-2.9218741659,4.1472038297,0.9125404572<br/> H,-3.9550191529,3.8138869566,0.9249501401<br/> C,-1.4460033711,-3.0416994528,0.8819367165<br/> C,-0.5917308622,3.7182444901,0.4071388461<br/> C,-0.2674646158,4.9349372419,1.0386171512<br/> H,0.7701171551,5.2275849703,1.1498294254<br/> C,-2.6046821432,5.3618840192,1.4921191185</p> |
|--|-------------------------------------------------------------------------------------------------------------------------------------------------------------------------------------------------------------------------------------------------------------------------------------------------------------------------------------------------------------------------------------------------------------------------------------------------------------------------------------------------------------------------------------------------------------------------------------------------------------------------------------------------------------------------------------------------------------------------------------------------------------------------------------------------------------------------------------------------------------------------------------------------------------------------------------------------------------------------------------------------------------------------------------------------------------------------------------------------------------------------------------------------------------------------------------------------------------------------------------------------------------------------------------------------------------------------------------------------------------------------------------------------------------------------------------------------------------------------------------------------------------------------------------------------------------------------------------------------------------------------------------------------------------------------------------------------------------------------------------------------------------------------------------------------------------------------------------------------------------------------------------------------------------------------------------------------------------------------------------------------------------------------------------------------------------------------------------------------------------------------------------------------------------------------------------------------------------------------------------------------------------------------------------------------------------------------------------------------------------------------------------------------------------------------------------------------------------------------------------------------------------------------------------------------------------------------------------------------------------------|



|                                                                                    |                                                                                                                                                                                                                                                                                                                                                                                                                                                                                                                                                                                                                                                                                                                                                                                                                                                                                                                                                                                                                                                                                                                                                                                                                                                                                                                                                                                                                                                                                                                                                                                  |
|------------------------------------------------------------------------------------|----------------------------------------------------------------------------------------------------------------------------------------------------------------------------------------------------------------------------------------------------------------------------------------------------------------------------------------------------------------------------------------------------------------------------------------------------------------------------------------------------------------------------------------------------------------------------------------------------------------------------------------------------------------------------------------------------------------------------------------------------------------------------------------------------------------------------------------------------------------------------------------------------------------------------------------------------------------------------------------------------------------------------------------------------------------------------------------------------------------------------------------------------------------------------------------------------------------------------------------------------------------------------------------------------------------------------------------------------------------------------------------------------------------------------------------------------------------------------------------------------------------------------------------------------------------------------------|
|                                                                                    | <p>B,-2.2354524263,1.852781708,-0.1082461223<br/> C,-3.4536891565,-2.993336859,2.84175093<br/> H,-4.2215674188,-2.9613796563,3.6087089406<br/> C,-2.4542963856,-3.9619994167,2.8883932544<br/> C,-1.4534076067,-3.9764994411,1.915520029<br/> H,-0.6560418537,-4.7148833753,1.9621451887<br/> C,-1.2600163176,5.744398433,1.5617488068<br/> H,-0.9800481571,6.6694439638,2.0576764234<br/> C,5.107474896,0.6668768438,1.0764758531<br/> H,5.3512551969,1.7262272409,1.0847548768<br/> H,4.1239273276,-3.0583560521,1.2774343097<br/> H,6.2201082436,-2.2942478933,2.2754100873<br/> O,-1.2948075672,-2.933731777,-1.6122092246<br/> C,-2.2045492152,-2.1210039851,-1.8228772757<br/> O,-2.9563904246,-1.7830077163,-2.663459825<br/> H,5.0008560066,5.0886558867,-1.7822439305<br/> H,-6.8763353196,1.6494905056,-1.1863331737<br/> H,-2.4475985948,-4.6952324259,3.6897057208<br/> H,2.038444721,-6.6371868274,-1.7286364716<br/> H,6.8867924788,0.1077192841,2.1492398419<br/> H,-3.3792769711,5.9911801129,1.9191212819<br/> N,-2.4065414914,-1.1034903615,-0.2703153757<br/> N,0.4607226302,2.8987292914,-0.0790533153<br/> N,2.3437014405,-1.580218871,-0.0462735249</p>                                                                                                                                                                                                                                                                                                                                                                                                    |
| 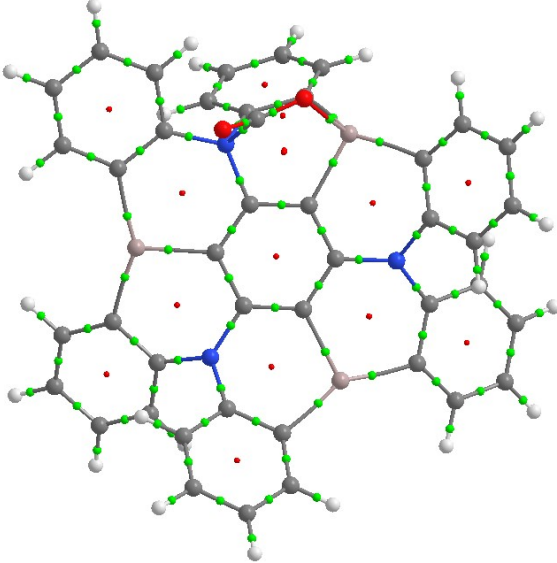 | <p><b>Al<sub>3</sub>N<sub>3</sub>-NG/CO<sub>2</sub></b><br/> <b>E = -2694,9166646H; FreqIm=1</b><br/> C,6.0215346065,-0.5936176153,2.2248055679<br/> C,3.6450921237,-1.0608160718,0.7649912532<br/> C,4.2109051221,0.2418008054,0.7966337549<br/> C,4.2673047485,-2.0893433851,1.5013595556<br/> C,5.4334655413,-1.8612514449,2.2137177697<br/> C,1.3713602018,0.7534189244,-0.0248609967<br/> C,2.7012705862,3.3945279577,-0.5076764138<br/> C,0.1809341094,1.4971760423,-0.0825221551<br/> C,3.8305405488,-2.8984732439,-1.3601005571<br/> H,4.546153066,-2.0816236811,-1.3893486009<br/> C,2.6186114088,-2.7210911758,-0.670141612<br/> C,1.2998264576,-0.653084715,-0.0804733324<br/> C,3.6263969466,4.2718232512,-1.1049586422<br/> H,4.6898873451,4.0657998697,-0.9989280724<br/> C,1.6613066115,-3.7668264168,-0.6583231032<br/> C,1.3204916788,3.6785999953,-0.6619055306<br/> C,0.9305810936,4.7902983073,-1.4313362016<br/> H,-0.1276689554,4.9918554916,-1.5703614848<br/> C,3.2351287782,5.3902964125,-1.8287781918<br/> C,4.1349635552,-4.0991877841,-1.9857348326<br/> H,5.081348414,-4.2042789001,-2.5089156032<br/> C,3.2246942578,-5.1549486924,-1.9504829943<br/> C,2.0051807291,-4.9653928079,-1.3101653626<br/> H,1.284479068,-5.7813159623,-1.3214952907<br/> C,1.8712141083,5.6345860081,-2.0019099878<br/> H,1.5366521523,6.4821047639,-2.5935758354<br/> C,0.0699151318,-1.3110612941,-0.2063658659<br/> C,-6.3456453849,-0.074634386,-1.1844891299<br/> C,-3.6861288625,-0.7672983925,-0.6206095221<br/> C,-4.0643265712,0.5855871309,-0.5668058385</p> |

|                                                                                                                                                                                                                                                                                                                                                                                                                                                                                                                                                                                                                                                                                                                                                                                                                                                                                                                                                                                                                                                                                                                                                                                                                                                                                                                                                                                                                                                                                                                                                                                                                                                                                                                                                                                                                                                                                                                                                                                                                                                                                                                                                                                                                           |
|---------------------------------------------------------------------------------------------------------------------------------------------------------------------------------------------------------------------------------------------------------------------------------------------------------------------------------------------------------------------------------------------------------------------------------------------------------------------------------------------------------------------------------------------------------------------------------------------------------------------------------------------------------------------------------------------------------------------------------------------------------------------------------------------------------------------------------------------------------------------------------------------------------------------------------------------------------------------------------------------------------------------------------------------------------------------------------------------------------------------------------------------------------------------------------------------------------------------------------------------------------------------------------------------------------------------------------------------------------------------------------------------------------------------------------------------------------------------------------------------------------------------------------------------------------------------------------------------------------------------------------------------------------------------------------------------------------------------------------------------------------------------------------------------------------------------------------------------------------------------------------------------------------------------------------------------------------------------------------------------------------------------------------------------------------------------------------------------------------------------------------------------------------------------------------------------------------------------------|
| <p>C,-5.4095126147,0.8946857926,-0.8581532882<br/> H,-5.7274518312,1.9349120203,-0.8247762864<br/> C,-4.6310909622,-1.7491195528,-0.9522318673<br/> H,-4.3317841416,-2.7950408411,-0.9748850888<br/> C,-5.9442501854,-1.4114387972,-1.2325543992<br/> H,-6.6539001649,-2.1917840319,-1.4901655225<br/> C,-1.0779660397,0.8651329273,-0.1729421772<br/> C,-2.1556169364,3.5903620734,0.4582738104<br/> C,-3.4637323555,-1.9015855687,1.8635005462<br/> H,-4.1209990888,-1.050950056,1.7201835695<br/> C,-2.4821328763,-2.2250888324,0.9229795434<br/> C,-1.0707229789,-0.526135237,-0.2253262235<br/> C,-2.9942271399,4.540896551,1.0730296577<br/> H,-4.0730360524,4.4177706689,0.9945199185<br/> C,-1.6032416963,-3.3077474618,1.121454697<br/> C,-0.7506470504,3.7623742758,0.5717259377<br/> C,-0.2589798353,4.847211743,1.3250396481<br/> H,0.8141999715,4.9670734672,1.4393921685<br/> C,-2.4996796348,5.6282871856,1.7782508255<br/> C,-3.6096964185,-2.6841399423,3.0068494987<br/> H,-4.3728627754,-2.4230816859,3.7340588467<br/> C,-2.7852504065,-3.785960313,3.2109891615<br/> C,-1.7925588057,-4.0759070293,2.2769568368<br/> H,-1.1329423141,-4.9210325654,2.4618374841<br/> C,-1.1156663607,5.7642051794,1.912897517<br/> H,-0.6996170524,6.5852424243,2.4900728681<br/> C,5.3957411945,0.4339786248,1.5345831416<br/> H,5.8382067684,1.4281133269,1.5666140452<br/> H,3.8228791721,-3.0799970926,1.5027044891<br/> H,5.8816809484,-2.677662094,2.7732542549<br/> H,-7.3732387261,0.2003160263,-1.4024635059<br/> H,-2.9033728978,-4.4025356117,4.0975806188<br/> H,-3.1735513174,6.3476863701,2.2335065386<br/> H,6.9385983609,-0.4133585255,2.7775675289<br/> H,3.9752620019,6.0513077502,-2.2697026285<br/> H,3.4544945013,-6.0999847881,-2.4340423035<br/> O,-2.3843441385,-1.6106315163,-2.824067489<br/> C,-1.961624441,-2.2580283703,-1.9402173037<br/> O,-1.3497352384,-3.2981241327,-1.6850563381<br/> N,0.245861834,2.9323683189,-0.0519558595<br/> N,2.485515385,-1.4451331111,0.0095378303<br/> N,-2.3532015105,-1.3445910224,-0.3029969227<br/> Al,-2.6642344482,1.8531438714,-0.17459368<br/> Al,-0.1428120145,-3.2222284118,-0.1825208162<br/> Al,3.0408346954,1.6083120024,0.1255559736</p> |
|---------------------------------------------------------------------------------------------------------------------------------------------------------------------------------------------------------------------------------------------------------------------------------------------------------------------------------------------------------------------------------------------------------------------------------------------------------------------------------------------------------------------------------------------------------------------------------------------------------------------------------------------------------------------------------------------------------------------------------------------------------------------------------------------------------------------------------------------------------------------------------------------------------------------------------------------------------------------------------------------------------------------------------------------------------------------------------------------------------------------------------------------------------------------------------------------------------------------------------------------------------------------------------------------------------------------------------------------------------------------------------------------------------------------------------------------------------------------------------------------------------------------------------------------------------------------------------------------------------------------------------------------------------------------------------------------------------------------------------------------------------------------------------------------------------------------------------------------------------------------------------------------------------------------------------------------------------------------------------------------------------------------------------------------------------------------------------------------------------------------------------------------------------------------------------------------------------------------------|

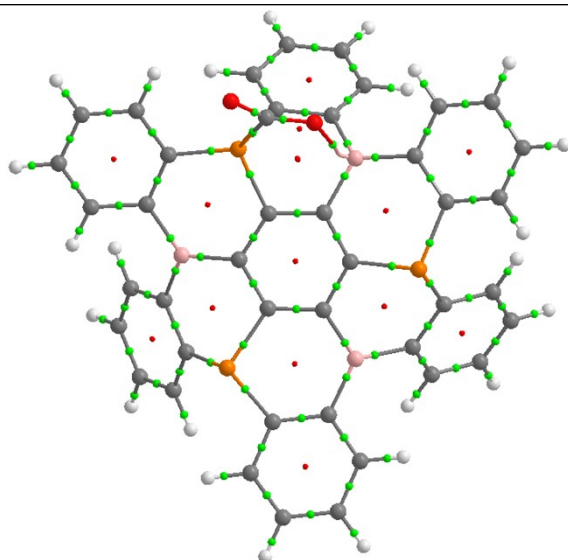

**B<sub>3</sub>P<sub>3</sub>-NG/CO<sub>2</sub>**

**E= -2902,0411847H; FreqIm=1**

C,0,2.758723,-4.735631,-2.231635  
 C,0,2.908658,-2.762857,-0.252097  
 C,0,1.665554,-3.402221,-0.494571  
 C,0,4.049659,-3.134395,-0.963633  
 C,0,3.973152,-4.113474,-1.953671  
 P,0,-2.523093,-1.564492,0.469053  
 P,0,2.960854,-1.542548,1.122132  
 C,0,0.27371,-1.415435,0.610924  
 C,0,-0.921952,-3.843417,0.308666  
 C,0,-0.938188,-0.725243,0.529052  
 C,0,5.621618,-0.852336,1.069744  
 H,0,5.774344,-1.900222,1.321195  
 C,0,4.325644,-0.37515,0.825076  
 C,0,1.447698,-0.620471,0.742433  
 C,0,-0.780805,-5.238484,0.411595  
 H,0,0.217249,-5.668425,0.400714  
 C,0,4.106287,1.000793,0.569756  
 C,0,-2.241661,-3.334703,0.378545  
 C,0,-3.349664,-4.175174,0.525519  
 H,0,-4.34753,-3.751661,0.616698  
 C,0,-1.879859,-6.082932,0.551673  
 B,0,0.344169,-2.91678,0.19741  
 C,0,6.715354,0.005393,1.034637  
 H,0,7.71388,-0.382765,1.214666  
 C,0,6.517974,1.368199,0.811575  
 C,0,5.2326,1.848591,0.591776  
 H,0,5.087043,2.916416,0.452758  
 C,0,-3.168543,-5.553984,0.594154  
 H,0,-4.027717,-6.207931,0.708254  
 B,0,2.677919,1.59406,0.346025  
 C,0,1.40132,0.780408,0.727987  
 C,0,-4.157057,4.800947,0.485568  
 C,0,-1.556683,3.772079,0.66862  
 C,0,-2.625692,2.897038,0.373937  
 C,0,-3.919443,3.443866,0.302686  
 H,0,-4.757263,2.775143,0.11774  
 C,0,-1.803079,5.138776,0.872295  
 H,0,-0.985441,5.80049,1.153025  
 C,0,-3.088324,5.656112,0.757233  
 H,0,-3.260061,6.717953,0.909605  
 P,0,0.128952,3.192587,1.068882  
 C,0,-1.057425,0.682533,0.557013  
 C,0,-3.237582,0.590292,-0.982851  
 C,0,1.032117,4.829673,-1.073895  
 H,0,0.123109,5.410803,-0.945112  
 C,0,1.263361,3.700515,-0.288405  
 C,0,0.122688,1.410587,0.712357  
 C,0,-3.838314,1.242305,-2.06751  
 H,0,-3.790004,2.326467,-2.128297  
 C,0,2.443437,2.931022,-0.451791  
 C,0,-3.298362,-0.821042,-0.982658  
 C,0,-3.952984,-1.546526,-1.974715  
 H,0,-3.982434,-2.633037,-1.93779  
 C,0,-4.483944,0.530561,-3.080057

|                                                                                    |                                                                                                                                                                                                                                                                                                                                                                                                                                                                                                                                                                                                                                                                                                                                                                                                                                                                                                                                                                                                                                                                                                                                                                                                                                                                                                                                                                                                                                                                                                                                                                                                                                                                                                                         |
|------------------------------------------------------------------------------------|-------------------------------------------------------------------------------------------------------------------------------------------------------------------------------------------------------------------------------------------------------------------------------------------------------------------------------------------------------------------------------------------------------------------------------------------------------------------------------------------------------------------------------------------------------------------------------------------------------------------------------------------------------------------------------------------------------------------------------------------------------------------------------------------------------------------------------------------------------------------------------------------------------------------------------------------------------------------------------------------------------------------------------------------------------------------------------------------------------------------------------------------------------------------------------------------------------------------------------------------------------------------------------------------------------------------------------------------------------------------------------------------------------------------------------------------------------------------------------------------------------------------------------------------------------------------------------------------------------------------------------------------------------------------------------------------------------------------------|
|                                                                                    | <p>B,0,-2.413348,1.364933,0.140725<br/> C,0,1.941958,5.192373,-2.06676<br/> H,0,1.739575,6.059417,-2.689662<br/> C,0,3.089072,4.431364,-2.275301<br/> C,0,3.329384,3.318519,-1.472812<br/> H,0,4.214591,2.717081,-1.662323<br/> C,0,-4.547526,-0.860276,-3.033309<br/> H,0,-5.048876,-1.412911,-3.822455<br/> C,0,1.625468,-4.379813,-1.505322<br/> H,0,0.676965,-4.85197,-1.747818<br/> H,0,4.997976,-2.637488,-0.779935<br/> H,0,4.863333,-4.3748,-2.519228<br/> O,0,-4.20683,-1.523722,2.747692<br/> C,0,-3.703536,-0.695687,2.045937<br/> O,0,-3.609286,0.501507,1.834918<br/> H,0,-1.729928,-7.155256,0.6367<br/> H,0,2.693167,-5.486969,-3.012865<br/> H,0,7.361169,2.05255,0.824607<br/> H,0,3.789293,4.698518,-3.061234<br/> H,0,-5.169344,5.190847,0.43132<br/> H,0,-4.93745,1.065025,-3.909834</p>                                                                                                                                                                                                                                                                                                                                                                                                                                                                                                                                                                                                                                                                                                                                                                                                                                                                                                            |
| 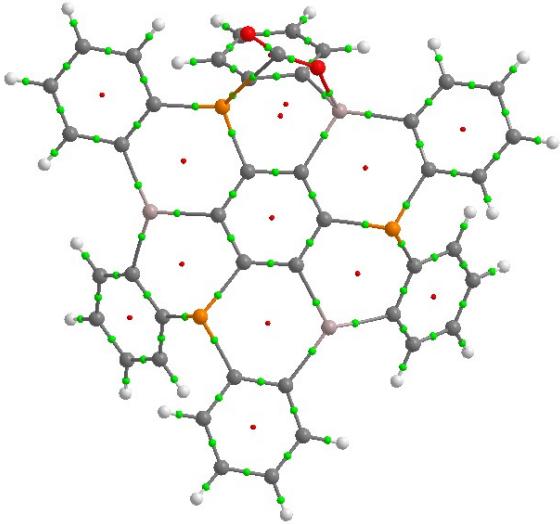 | <p><b>Al<sub>3</sub>P<sub>3</sub>-NG/CO<sub>2</sub></b><br/> <b>E= -3554,72945685H; FreqIm=1</b><br/> C,3.4988775333,-4.5221274188,-2.4438504888<br/> C,3.1776005575,-2.6624588953,-0.3563066748<br/> C,2.1514410563,-3.6089626181,-0.6201305187<br/> C,4.3322737469,-2.6581710102,-1.1445554998<br/> C,4.4894853186,-3.5826356867,-2.1797449781<br/> P,-2.5793855529,-1.649169367,0.6573712821<br/> P,3.0128145234,-1.5836413976,1.1642364605<br/> C,0.2906449614,-1.4290911329,0.754535217<br/> C,-1.2654473083,-4.2210178908,0.2630700758<br/> C,-0.944131116,-0.7807583267,0.677027097<br/> C,5.6835742851,-1.1861635322,1.446157646<br/> H,5.6186066107,-2.2202110493,1.7811965369<br/> C,4.5160648713,-0.5078018404,1.0574075746<br/> C,1.4551572198,-0.6140500599,0.8390060252<br/> C,-1.3861503028,-5.6187112287,0.1655275066<br/> H,-0.4994737131,-6.2192215411,-0.0325276104<br/> C,4.5968643492,0.8489045407,0.6633882613<br/> C,-2.4398765432,-3.478011378,0.5305714296<br/> C,-3.6652353308,-4.1375229866,0.7134017416<br/> H,-4.5614456832,-3.5624173679,0.9405090757<br/> C,-2.6084411832,-6.2684117287,0.3193494659<br/> Al,0.4274809512,-3.2709220029,0.2085667914<br/> C,6.9266482055,-0.5631694129,1.3982033298<br/> H,7.8169705583,-1.1126843051,1.6910446545<br/> C,7.023021604,0.7662905063,0.9883365105<br/> C,5.8655590243,1.4572357861,0.6418561219<br/> H,5.9513257263,2.5034653795,0.3512580323<br/> C,-3.7522588815,-5.5217666681,0.5978863404<br/> H,-4.7102227084,-6.0154327188,0.7338284086<br/> Al,2.9378446497,1.808227564,0.3919444285<br/> C,1.373562944,0.7817899998,0.8568178956<br/> C,-3.8750472323,5.5554166454,0.5773889843<br/> C,-1.5442066744,4.0010137102,0.8152232788</p> |

|  |                                                                                                                                                                                                                                                                                                                                                                                                                                                                                                                                                                                                                                                                                                                                                                                                                                                                                                                                                                                                                                                                                                                                                                                                                                                                                                                                                                                                                                                                                                                                                                                                                                                                                                                                                                                                                                                                                                                                                                                                                                                                  |
|--|------------------------------------------------------------------------------------------------------------------------------------------------------------------------------------------------------------------------------------------------------------------------------------------------------------------------------------------------------------------------------------------------------------------------------------------------------------------------------------------------------------------------------------------------------------------------------------------------------------------------------------------------------------------------------------------------------------------------------------------------------------------------------------------------------------------------------------------------------------------------------------------------------------------------------------------------------------------------------------------------------------------------------------------------------------------------------------------------------------------------------------------------------------------------------------------------------------------------------------------------------------------------------------------------------------------------------------------------------------------------------------------------------------------------------------------------------------------------------------------------------------------------------------------------------------------------------------------------------------------------------------------------------------------------------------------------------------------------------------------------------------------------------------------------------------------------------------------------------------------------------------------------------------------------------------------------------------------------------------------------------------------------------------------------------------------|
|  | <p> C,-2.7573275057,3.3760731858,0.445003025<br/> C,-3.9037062148,4.1850645841,0.3357240967<br/> H,-4.8530021357,3.7284878628,0.055948992<br/> C,-1.530143035,5.3780523141,1.1010889439<br/> H,-0.6036271042,5.8514632407,1.4231291027<br/> C,-2.6772254032,6.1528699883,0.9687822654<br/> H,-2.6377263375,7.2175359146,1.1818634408<br/> P,0.1253462912,3.233664292,1.0542785493<br/> C,-1.0880415582,0.6332138168,0.7214455467<br/> C,-3.6168875929,0.2684608773,-1.0846729957<br/> C,0.5558234139,4.782950143,-1.3238550338<br/> H,-0.478153676,5.1042468085,-1.2406374063<br/> C,1.0801913459,3.8384833714,-0.436622537<br/> C,0.0841653477,1.3878898464,0.7970156604<br/> C,-4.2629003219,0.6810441352,-2.2575672792<br/> H,-4.4690991332,1.7394006986,-2.4116770502<br/> C,2.4280425531,3.4138019047,-0.5778447609<br/> C,-3.3486663937,-1.1163124149,-0.9438609802<br/> C,-3.7300183838,-2.0318117423,-1.9285182954<br/> H,-3.5172972006,-3.0916490359,-1.8142404602<br/> C,-4.6544996761,-0.2276920243,-3.2430980286<br/> Al,-2.8053609589,1.4412113579,0.2748972321<br/> C,1.350869908,5.3216725942,-2.3382037483<br/> H,0.9224223548,6.0514966476,-3.0201144944<br/> C,2.6760163256,4.9251121892,-2.482614861<br/> C,3.1961781499,3.9652245819,-1.6131406829<br/> H,4.2270535543,3.6407173039,-1.7506936358<br/> C,-4.3837411056,-1.5828016259,-3.0772299332<br/> H,-4.6742505629,-2.2967760242,-3.843102001<br/> C,2.33538049,-4.5163531887,-1.6733432195<br/> H,1.5533216963,-5.2386662557,-1.9045835004<br/> H,5.1194178002,-1.9313013804,-0.968151692<br/> H,5.3929019666,-3.5579543146,-2.7833148819<br/> O,-4.6615371145,-1.0535115382,3.0446632724<br/> C,-4.1941851168,-0.2392884468,2.3666337997<br/> O,-3.9423911292,0.8246740592,1.8873059988<br/> H,-2.6686586123,-7.3496866673,0.23405227<br/> H,3.6244629782,-5.2441724573,-3.2456338099<br/> H,7.9893271767,1.2616372175,0.9558969035<br/> H,3.294981607,5.3492325831,-3.2681961963<br/> H,-4.7784753014,6.1508350658,0.4779264709<br/> H,-5.1636818517,0.1211629642,-4.1374014877 </p> |
|--|------------------------------------------------------------------------------------------------------------------------------------------------------------------------------------------------------------------------------------------------------------------------------------------------------------------------------------------------------------------------------------------------------------------------------------------------------------------------------------------------------------------------------------------------------------------------------------------------------------------------------------------------------------------------------------------------------------------------------------------------------------------------------------------------------------------------------------------------------------------------------------------------------------------------------------------------------------------------------------------------------------------------------------------------------------------------------------------------------------------------------------------------------------------------------------------------------------------------------------------------------------------------------------------------------------------------------------------------------------------------------------------------------------------------------------------------------------------------------------------------------------------------------------------------------------------------------------------------------------------------------------------------------------------------------------------------------------------------------------------------------------------------------------------------------------------------------------------------------------------------------------------------------------------------------------------------------------------------------------------------------------------------------------------------------------------|

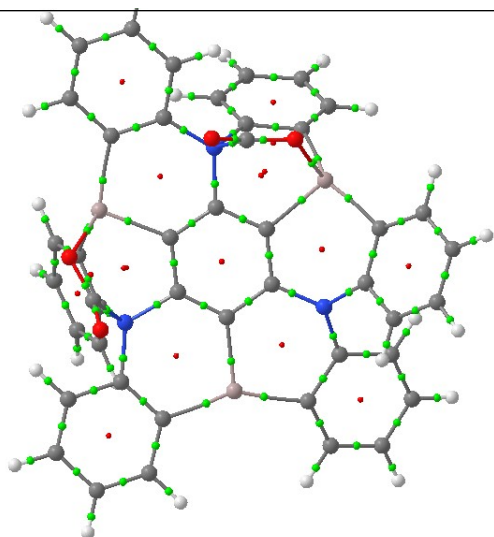

**1CO<sub>2</sub>-Al<sub>3</sub>N<sub>3</sub>-NG/CO<sub>2</sub>**

**E= -2883,5046344H; FreqIm=1**

C, -5.96190700, 1.63297900, 1.95149200  
 C, -3.45831300, 1.78625800, 0.63415700  
 C, -4.22359700, 0.58886600, 0.57147300  
 C, -3.95654200, 2.86402900, 1.39680400  
 C, -5.18191000, 2.79024200, 2.03720800  
 N, -0.60363100,-2.73675400,-0.36375100  
 N, -2.21447700, 2.01549300,-0.03883500  
 C, -1.48358800,-0.34236200,-0.20175400  
 C, -3.19169100,-2.81261100,-0.49739100  
 C, -0.41957300,-1.23087900,-0.27856900  
 C, -3.20929200, 3.77102500,-1.35253100  
 H, -4.05194500, 3.09606100,-1.47356200  
 C, -2.08550000, 3.33884900,-0.62787800  
 C, -1.17654200, 1.03962600,-0.14754800  
 C, -4.30357600,-3.64736400,-0.73698100  
 H, -5.30333000,-3.22723600,-0.64697800  
 C, -0.96100000, 4.19381600,-0.50144800  
 C, -1.91449500,-3.38756000,-0.62495400  
 C, -1.78267800,-4.73858000,-0.97673900  
 H, -0.79035200,-5.17748000,-1.05706700  
 C, -4.17525700,-4.98414100,-1.08197900  
 Al, -3.26312500,-0.92446600,-0.09927000  
 C, -3.26904900, 5.04538300,-1.89896400  
 H, -4.15337100, 5.34910200,-2.45217700  
 C, -2.19340800, 5.91914800,-1.74733800  
 C, -1.05980600, 5.47461900,-1.07593800  
 H, -0.20827600, 6.14874100,-1.00168700  
 C, -2.89575500,-5.52999500,-1.20415700  
 H, -2.76419800,-6.57229300,-1.47821200  
 Al, 0.71536600, 3.31825900,-0.03231700  
 C, 0.14716000, 1.47871400,-0.19391000  
 C, 6.27781700,-0.91925600,-1.03748200  
 C, 3.77988800, 0.24659300,-0.56917600  
 C, 3.86609600,-1.15496800,-0.60489700  
 C, 5.14673400,-1.69855900,-0.84425300  
 H, 5.25480800,-2.78093200,-0.88027800  
 C, 4.91645800, 1.04215200,-0.76397300  
 H, 4.83107900, 2.12574300,-0.71988400  
 C, 6.15527600, 0.47012200,-0.99744900  
 H, 7.02026900, 1.10839200,-1.14906000  
 N, 2.56223000, 1.09317000,-0.27513800  
 C,,0.92063500,-0.84633500,-0.30989000  
 C, 1.45307600,-3.42684800, 0.95058100  
 C, 3.63881600, 1.22591600, 1.98394800  
 H, 4.14565900, 0.29205800, 1.77122000  
 C, 2.78535000, 1.82272700, 1.05438200  
 C, 1.13880800, 0.51248200,-0.26591900  
 C, 1.98336700,-4.07431700, 2.07361100  
 H, 3.06306900,-4.10393500, 2.20460500  
 C, 2.08332800, 3.00777700, 1.34478500  
 C, 0.05100600,-3.41314500, 0.82276200  
 C, -0.77545200,-3.97542700, 1.79917100  
 H, -1.85565100,-3.93854800, 1.71092800  
 C, 1.17572800,-4.66788400, 3.04145400

|                                                                                    |                                                                                                                                                                                                                                                                                                                                                                                                                                                                                                                                                                                                                                                                                                                                                                                                                                                                                                                                                                                                                                                                                                                                                                                                                                                                                 |
|------------------------------------------------------------------------------------|---------------------------------------------------------------------------------------------------------------------------------------------------------------------------------------------------------------------------------------------------------------------------------------------------------------------------------------------------------------------------------------------------------------------------------------------------------------------------------------------------------------------------------------------------------------------------------------------------------------------------------------------------------------------------------------------------------------------------------------------------------------------------------------------------------------------------------------------------------------------------------------------------------------------------------------------------------------------------------------------------------------------------------------------------------------------------------------------------------------------------------------------------------------------------------------------------------------------------------------------------------------------------------|
|                                                                                    | <p>Al, 2.25143700,-2.21822600,-0.36380900<br/> C, 3.84807200, 1.84191100, 3.21635700<br/> H, 4.51286500, 1.37280200, 3.93545600<br/> C, 3.21200400, 3.04139800, 3.51715400<br/> C, 2.33522100, 3.59935500, 2.58854100<br/> H, 1.81544400, 4.51895700, 2.84832400<br/> C, -0.20747300,-4.60042100, 2.90702100<br/> H, -0.85700700,-5.03241200, 3.66249700<br/> C, -5.46500600, 0.55288200, 1.23946400<br/> H, -6.05720200,-0.35974200, 1.19653000<br/> H, -3.36444100, 3.77033500, 1.47649800<br/> H, -5.52743600, 3.64057100, 2.61859000<br/> O, -0.52980700,-2.95560200,-2.89790800<br/> C, 0.28353200,-2.99877200,-2.05444600<br/> O, 1.49707000,-3.13430900,-1.86266200<br/> O, 1.98445000, 3.23311700,-1.42029400<br/> C, 2.45238600, 2.09687200,-1.67814300<br/> O, 2.81108000, 1.53140100,-2.65643900<br/> H, -2.22949600, 6.91962300,-2.16857600<br/> H, -6.92556200, 1.57574300, 2.44831800<br/> H, -5.05449800,-5.59642400,-1.25811900<br/> H, 1.61967300,-5.16221200, 3.90083100<br/> H, 7.24301600,-1.38262600,-1.21941100<br/> H, 3.38177200, 3.52720800, 4.47392300</p>                                                                                                                                                                                            |
| 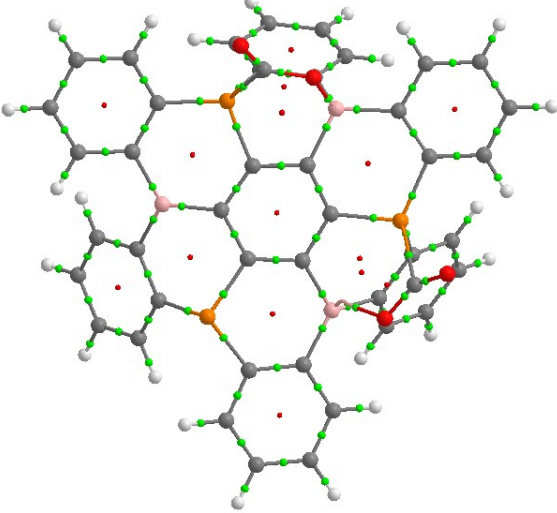 | <p><b>1CO<sub>2</sub>-B<sub>3</sub>P<sub>3</sub>-NG/CO<sub>2</sub></b><br/> <b>E= -3090,63699532H; FreqIm=1</b><br/> C,0,-2.77962,5.068896,1.993126<br/> C,0,-0.893069,4.000541,0.210768<br/> C,0,-2.152658,3.354467,0.361067<br/> C,0,-0.614671,5.169044,0.92151<br/> C,0,-1.547913,5.694647,1.813802<br/> P,0,-2.895591,-1.150593,-0.351733<br/> P,0,0.260881,3.343541,-1.065994<br/> C,0,-1.21661,1.071305,-0.624867<br/> C,0,-3.912328,1.40392,-0.503337<br/> C,0,-1.336519,-0.317943,-0.564656<br/> C,0,2.360257,5.109185,-0.829812<br/> H,0,1.611046,5.84794,-1.108369<br/> C,0,1.985749,3.770034,-0.639352<br/> C,0,0.104158,1.580192,-0.6874<br/> C,0,-4.978298,2.282352,-0.754314<br/> H,0,-4.783366,3.351039,-0.780037<br/> C,0,2.970589,2.791793,-0.363345<br/> C,0,-4.231248,0.020691,-0.526892<br/> C,0,-5.52402,-0.45214,-0.760862<br/> H,0,-5.719387,-1.521002,-0.793837<br/> C,0,-6.272882,1.823414,-0.998518<br/> B,0,-2.445491,1.971017,-0.303161<br/> C,0,3.688733,5.502375,-0.712535<br/> H,0,3.958537,6.545146,-0.853796<br/> C,0,4.673042,4.547673,-0.456988<br/> C,0,4.309638,3.216134,-0.293276<br/> H,0,5.082132,2.469205,-0.12545<br/> C,0,-6.552288,0.459127,-0.991179<br/> H,0,-7.55908,0.102135,-1.183591<br/> B,0,2.628093,1.277946,-0.156433</p> |

|                                   |
|-----------------------------------|
| C,0,1.21211,0.730119,-0.567893    |
| C,0,1.371347,-6.133248,-0.484076  |
| C,0,1.95969,-3.417569,-0.435597   |
| C,0,0.602473,-3.808415,-0.419134  |
| C,0,0.349536,-5.188673,-0.446566  |
| H,0,-0.686018,-5.523799,-0.445073 |
| C,0,2.996276,-4.362255,-0.5016    |
| H,0,4.030944,-4.031294,-0.573154  |
| C,0,2.703869,-5.720624,-0.508731  |
| H,0,3.507267,-6.449477,-0.556179  |
| P,0,2.458855,-1.686855,-0.566553  |
| C,0,-0.281808,-1.236002,-0.562037 |
| C,0,-1.508671,-2.890033,1.05828   |
| C,0,3.927993,-1.821045,1.850105   |
| H,0,3.853809,-2.904448,1.794389   |
| C,0,3.325189,-1.022012,0.88138    |
| C,0,0.984818,-0.663551,-0.561336  |
| C,0,-1.195912,-3.661635,2.180067  |
| H,0,-0.300675,-4.279328,2.166905  |
| C,0,3.397547,0.391082,0.916787    |
| C,0,-2.680264,-2.110509,1.15515   |
| C,0,-3.518527,-2.090339,2.265864  |
| H,0,-4.411494,-1.469768,2.283828  |
| C,0,-2.014724,-3.657248,3.31329   |
| B,0,-0.645914,-2.801011,-0.34431  |
| C,0,4.601602,-1.217378,2.911804   |
| H,0,5.060724,-1.832857,3.680027   |
| C,0,4.669787,0.171322,2.989956    |
| C,0,4.075109,0.95978,2.003973     |
| H,0,4.126233,2.04214,2.09029      |
| C,0,-3.172576,-2.881061,3.360985  |
| H,0,-3.800676,-2.886788,4.246487  |
| C,0,-3.069451,3.916182,1.270229   |
| H,0,-4.021438,3.418384,1.437164   |
| H,0,0.349856,5.656976,0.814614    |
| H,0,-1.301961,6.587956,2.381363   |
| O,0,-3.668407,-2.743456,-2.426246 |
| C,0,-2.780253,-2.547758,-1.637003 |
| O,0,-1.670577,-3.192136,-1.47204  |
| O,0,3.698383,0.317681,-1.93503    |
| C,0,3.703923,-0.872917,-2.1836    |
| O,0,4.116411,-1.726425,-2.907757  |
| H,0,-7.066397,2.536904,-1.200524  |
| H,0,5.717718,4.839646,-0.402867   |
| H,0,-3.503061,5.470977,2.69588    |
| H,0,5.184335,0.64352,3.821904     |
| H,0,-1.746257,-4.268763,4.170381  |
| H,0,1.130373,-7.192468,-0.507496  |



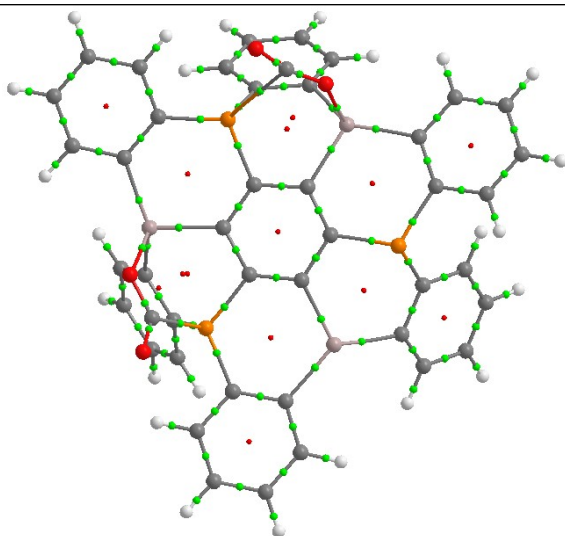

**1CO<sub>2</sub>-Al<sub>3</sub>P<sub>3</sub>-NG/CO<sub>2</sub>**

**E= -3743,361634H; FreqIm=1**

C,-1.65782300,-5.64350100, 2.37576300  
 C,-2.00384700,-3.69657200, 0.37122300  
 C,-0.72410100,-4.28282000, 0.57264800  
 C,-3.07363200,-4.08420000, 1.18248900  
 C,-2.90003500,-5.05102900, 2.17563400  
 P, 3.11537100,-0.84505300,-0.68216800  
 P,-2.22897600,-2.55921200,-1.09786000  
 C, 0.32115800,-1.56132000,-0.68698100  
 C, 2.69834200,-3.71620400,-0.37763300  
 C, 1.29277100,-0.55925200,-0.58189200  
 C,-4.87730600,-3.05081700,-1.29332700  
 H,-4.47941000,-4.03339100,-1.54465700  
 C,-3.99409500,-2.00207100,-0.97646800  
 C,-1.04690200,-1.17807300,-0.71432400  
 C, 3.26303400,-5.00422400,-0.34806400  
 H, 2.61998400,-5.86441700,-0.16749300  
 C,-4.50705700,-0.70885900,-0.71042100  
 C, 3.56878900,-2.62637800,-0.62371000  
 C, 4.93466900,-2.85299500,-0.85489400  
 H, 5.59480900,-2.01321600,-1.06672500  
 C, 4.62371000,-5.22329400,-0.54843900  
 Al,0.78469700,-3.38445000,-0.25566200  
 C,-6.25473700,-2.86322100,-1.28837700  
 H,-6.91444100,-3.69391900,-1.52355000  
 C,-6.77747500,-1.60364800,-0.99963800  
 C,-5.90605400,-0.55222700,-0.73080700  
 H,-6.33148300, 0.43185400,-0.53612000  
 C, 5.46197000,-4.13993700,-0.80667100  
 H, 6.52300500,-4.29535100,-0.97947700  
 Al, -3.29697300, 0.79804500,-0.42101700  
 C,-1.44010700, 0.15696500,-0.60255800  
 C, 1.83866000, 6.38860500,-0.23498600  
 C, 0.18881500, 4.15207200,-0.31764300  
 C, 1.58382700, 3.95055500,-0.18719700  
 C, 2.38002400, 5.10723100,-0.14654000  
 H, 3.46013300, 5.00809800,-0.04730800  
 C,-0.36608800, 5.43654000,-0.41443600  
 H,-1.43850100, 5.56573200,-0.53420400  
 C, 0.46203200, 6.55350400,-0.37253200  
 H, 0.03119700, 7.54672100,-0.45313100  
 P,-1.02794400, 2.80888500,-0.31111500  
 C, 0.96461600, 0.81748300,-0.51678700  
 C, 3.60429800, 1.27905500, 1.07833200  
 C,-1.75599800, 3.71665800, 2.24643400  
 H,-0.89914100, 4.38442800, 2.19602500  
 C,-2.06089700, 2.85419500, 1.19030100  
 C,-0.39884500, 1.10433900,-0.50040300  
 C, 4.16930900, 1.85420900, 2.22411000  
 H, 4.04017000, 2.91983600, 2.40909300  
 C,-3.15886400, 1.96320200, 1.20633300  
 C, 3.77826900,-0.11744300, 0.89346900  
 C, 4.50008300,-0.87911400, 1.81615500  
 H, 4.62594500,-1.94917300, 1.67379000  
 C, 4.89938300, 1.09957400, 3.14468300

|                                                                                    |                                                                                                                                                                                                                                                                                                                                                                                                                                                                                                                                                                                                                                                                                                                                                                                                                                                                                                                                                                                                                                                                                                                                                                                                                                                                                                                                                                                                                                                                                                                                                                                                                   |
|------------------------------------------------------------------------------------|-------------------------------------------------------------------------------------------------------------------------------------------------------------------------------------------------------------------------------------------------------------------------------------------------------------------------------------------------------------------------------------------------------------------------------------------------------------------------------------------------------------------------------------------------------------------------------------------------------------------------------------------------------------------------------------------------------------------------------------------------------------------------------------------------------------------------------------------------------------------------------------------------------------------------------------------------------------------------------------------------------------------------------------------------------------------------------------------------------------------------------------------------------------------------------------------------------------------------------------------------------------------------------------------------------------------------------------------------------------------------------------------------------------------------------------------------------------------------------------------------------------------------------------------------------------------------------------------------------------------|
|                                                                                    | <p>Al,2.34901900, 2.14236200,-0.16172400<br/> C,-2.57081200, 3.70611000, 3.37721600<br/> H,-2.34995500, 4.36872300, 4.20882500<br/> C,-3.66297300, 2.84217800, 3.43415100<br/> C,-3.94380300, 1.98626800, 2.36638100<br/> H,-4.79995600, 1.31839300, 2.44345100<br/> C, 5.05885800,-0.26743700, 2.93975800<br/> H, 5.61346500,-0.86692300, 3.65638900<br/> C,-0.58002100,-5.24248100, 1.58529300<br/> H, 0.39570300,-5.69162800, 1.76800500<br/> H,-4.05208000,-3.63084700, 1.05477100<br/> H,-3.74538900,-5.33356800, 2.79747700<br/> O, 4.65820700, 0.53885600,-3.19310800<br/> C, 4.00312300, 1.12101100,-2.44024400<br/> O, 3.43782200, 2.01134700,-1.87780800<br/> O,-3.24716500, 2.16355200,-1.69229800<br/> C,-2.31578800, 3.05000600,-1.72415800<br/> O,-2.16584000, 3.97880500,-2.47865800<br/> H,-7.85181900,-1.44085100,-1.00249600<br/> H,-1.52558600,-6.40006900, 3.14396300<br/> H, 5.02693800,-6.23141400,-0.51571200<br/> H, 5.33535300, 1.57525000, 4.01881400<br/> H, 2.48955900, 7.25791200,-0.20202000<br/> H,-4.29801200, 2.83474900, 4.31620200</p>                                                                                                                                                                                                                                                                                                                                                                                                                                                                                                                                         |
| 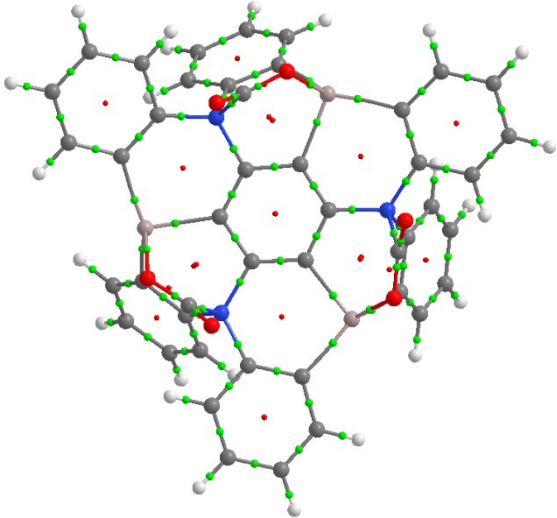 | <p><b>2CO<sub>2</sub>-Al<sub>3</sub>N<sub>3</sub>-NG/CO<sub>2</sub></b><br/> <b>E=-3072,0965532H; FreqIm=1</b><br/> C,-4.7551353127,-0.6401651272,3.2510246937<br/> C,-3.4477161891,0.2854783959,0.9678549085<br/> C,-3.6278069903,-1.1036394596,1.1291432555<br/> C,-3.8706023497,1.1894308497,1.9461177603<br/> C,-4.5233536307,0.721941647,3.0840823746<br/> N,0.6895515539,-2.7822872805,-0.3004259118<br/> N,-2.7460756978,0.8274830545,-0.2485816628<br/> C,-1.0487611902,-0.9302037214,-0.2373276189<br/> C,-1.7149603262,-3.815331338,-0.4478493635<br/> C,0.2677130859,-1.3089303384,-0.2560277112<br/> C,-4.5839862162,2.2592080883,-0.798554801<br/> H,-5.1578548794,1.3346125782,-0.7984440905<br/> C,-3.2068064734,2.2146135142,-0.5309115138<br/> C,-1.2931082988,0.4536499531,-0.232004112<br/> C,-2.4186003454,-5.0273034847,-0.6194137934<br/> H,-3.5060605135,-5.00763374,-0.5807493243<br/> C,-2.4477734165,3.4036925641,-0.518834701<br/> C,-0.3133305784,-3.8963305704,-0.5068893713<br/> C,0.3286420678,-5.1209734211,-0.7314613843<br/> H,1.4150212627,-5.1634236954,-0.7656420763<br/> C,-1.7921528321,-6.2453621179,-0.8380167263<br/> Al,-2.5764853125,-2.0828831157,-0.1952992256<br/> C,-5.2337220265,3.4562648153,-1.0450383081<br/> H,-6.2999971615,3.4560446132,-1.2501490579<br/> C,-4.5097491738,4.649066378,-1.0333901855<br/> C,-3.1470909222,4.6021586208,-0.7778221181<br/> H,-2.5920288052,5.5384100807,-0.7794954202<br/> C,-0.3987271161,-6.2870601543,-0.8967762609<br/> H,0.1219955054,-7.2231973258,-1.0728147435<br/> Al,-0.5156378741,3.3067164223,-0.2457798778</p> |

|  |                                                                                                                                                                                                                                                                                                                                                                                                                                                                                                                                                                                                                                                                                                                                                                                                                                                                                                                                                                                                                                                                                                                                                                                                                                                                                                                                                                                                                                                                                                                                                                                                                                                                                                                                                                                                                                                                                                                                                                                                                                                                                                                                                                                                                                                                                                                                                                                                                                                                                             |
|--|---------------------------------------------------------------------------------------------------------------------------------------------------------------------------------------------------------------------------------------------------------------------------------------------------------------------------------------------------------------------------------------------------------------------------------------------------------------------------------------------------------------------------------------------------------------------------------------------------------------------------------------------------------------------------------------------------------------------------------------------------------------------------------------------------------------------------------------------------------------------------------------------------------------------------------------------------------------------------------------------------------------------------------------------------------------------------------------------------------------------------------------------------------------------------------------------------------------------------------------------------------------------------------------------------------------------------------------------------------------------------------------------------------------------------------------------------------------------------------------------------------------------------------------------------------------------------------------------------------------------------------------------------------------------------------------------------------------------------------------------------------------------------------------------------------------------------------------------------------------------------------------------------------------------------------------------------------------------------------------------------------------------------------------------------------------------------------------------------------------------------------------------------------------------------------------------------------------------------------------------------------------------------------------------------------------------------------------------------------------------------------------------------------------------------------------------------------------------------------------------|
|  | <p> C,-0.2947411633,1.3972136994,-0.2512973943<br/> C,6.3118026056,1.5808574809,-0.9405235662<br/> C,3.5438333139,1.6905666568,-0.5636891375<br/> C,4.1725959457,0.43413873,-0.5207709643<br/> C,5.5711187135,0.4299466277,-0.7153638091<br/> H,6.0964589917,-0.5228425552,-0.6910173744<br/> C,4.2824116876,2.8582098023,-0.7955706883<br/> H,3.777455911,3.8213531811,-0.8181840379<br/> C,5.6530084051,2.8099574466,-0.9832164124<br/> H,6.2019911524,3.728795228,-1.1645997885<br/> N,2.0812089891,2.0074707084,-0.3334564473<br/> C,1.3490111564,-0.420174785,-0.2714579299<br/> C,2.7783291364,-2.5177917343,1.1396929333<br/> C,2.9445193891,2.7197245362,1.9091115654<br/> H,3.7831886019,2.0471618321,1.7729465472<br/> C,1.9564855298,2.8612438984,0.9333300651<br/> C,1.015609226,0.9079692128,-0.2739293274<br/> C,3.445738362,-2.8270327802,2.3313116194<br/> H,4.4365190545,-2.411661808,2.5026970162<br/> C,0.8342152526,3.6877793419,1.1274560394<br/> C,1.5017904994,-3.0824818541,0.964191795<br/> C,0.8954512043,-3.8559486441,1.9553730668<br/> H,-0.1058038001,-4.2518359867,1.8326623111<br/> C,2.8774142493,-3.631427714,3.3168727859<br/> Al,3.1113339152,-1.1854060862,-0.2611891668<br/> C,2.8538217754,3.4591164975,3.0867674118<br/> H,3.6257248063,3.346162699,3.8420235433<br/> C,1.7870690574,4.3283298851,3.2892594497<br/> C,0.7905895421,4.4209077231,2.3198150263<br/> H,-0.0597400959,5.0736224633,2.5053192341<br/> C,1.5914210425,-4.1280004411,3.1314252956<br/> H,1.1159511427,-4.7309662137,3.8990941184<br/> C,-4.2953182003,-1.5315815085,2.2841226054<br/> H,-4.4508441785,-2.5971443608,2.4403140212<br/> H,-3.6989122882,2.254181931,1.8315527235<br/> H,-4.8467662156,1.4324769695,3.8390587469<br/> O,0.9152064277,-3.1293695654,-2.7028387603<br/> C,1.5797686571,-2.7870104358,-1.7843589892<br/> O,2.7679423123,-2.3945081127,-1.6423713735<br/> O,0.678954768,3.609235672,-1.6509469293<br/> C,1.6174772705,2.7850568461,-1.8088694844<br/> O,2.2375609536,2.3902418922,-2.7373669776<br/> O,-3.4375871828,-1.2803358925,-1.7082159587<br/> C,-3.227673814,-0.0945397047,-1.9620810426<br/> O,-3.1748662664,0.7120091301,-2.8048754537<br/> H,-5.0034942479,5.5967684836,-1.2270955011<br/> H,-5.2716805564,-1.0047224215,4.1343417035<br/> H,-2.3767605326,-7.1516229778,-0.9654567993<br/> H,3.4233999252,-3.8513025291,4.2298777407<br/> H,7.3866033173,1.5258632132,-1.086057272<br/> H,1.7211774082,4.9116746382,4.2032955881 </p> |
|--|---------------------------------------------------------------------------------------------------------------------------------------------------------------------------------------------------------------------------------------------------------------------------------------------------------------------------------------------------------------------------------------------------------------------------------------------------------------------------------------------------------------------------------------------------------------------------------------------------------------------------------------------------------------------------------------------------------------------------------------------------------------------------------------------------------------------------------------------------------------------------------------------------------------------------------------------------------------------------------------------------------------------------------------------------------------------------------------------------------------------------------------------------------------------------------------------------------------------------------------------------------------------------------------------------------------------------------------------------------------------------------------------------------------------------------------------------------------------------------------------------------------------------------------------------------------------------------------------------------------------------------------------------------------------------------------------------------------------------------------------------------------------------------------------------------------------------------------------------------------------------------------------------------------------------------------------------------------------------------------------------------------------------------------------------------------------------------------------------------------------------------------------------------------------------------------------------------------------------------------------------------------------------------------------------------------------------------------------------------------------------------------------------------------------------------------------------------------------------------------------|

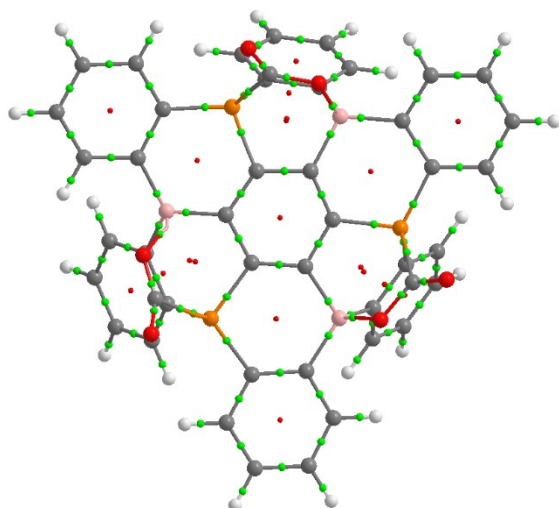

**2CO<sub>2</sub>-B<sub>3</sub>P<sub>3</sub>-NG/CO<sub>2</sub>**

**E=-3279,238901H; FreqIm=1**

C,0,-4.71818,-1.734758,2.844082  
 C,0,-3.690547,-0.106937,0.832181  
 C,0,-3.279823,-1.465138,0.890315  
 C,0,-4.60508,0.413226,1.745492  
 C,0,-5.112124,-0.402157,2.758156  
 P,0,0.858178,-3.007128,-0.299797  
 P,0,-3.05169,0.842663,-0.589553  
 C,0,-1.042829,-0.967779,-0.435586  
 C,0,-1.858479,-3.55104,-0.290578  
 C,0,0.29474,-1.336161,-0.470635  
 C,0,-4.456262,3.187743,-0.479968  
 H,0,-5.31988,2.527396,-0.540606  
 C,0,-3.161201,2.646678,-0.433739  
 C,0,-1.317037,0.410314,-0.514147  
 C,0,-2.921896,-4.453295,-0.429434  
 H,0,-3.937346,-4.064939,-0.407059  
 C,0,-2.014448,3.477361,-0.434318  
 C,0,-0.552858,-4.107952,-0.358576  
 C,0,-0.33136,-5.47647,-0.542334  
 H,0,0.68255,-5.862698,-0.613947  
 C,0,-2.712887,-5.818391,-0.620912  
 B,0,-2.168256,-2.004307,-0.09733  
 C,0,-4.644334,4.564363,-0.480869  
 H,0,-5.64856,4.976356,-0.510547  
 C,0,-3.531147,5.404838,-0.474135  
 C,0,-2.249757,4.861292,-0.45841  
 H,0,-1.389435,5.528077,-0.470577  
 C,0,-1.41938,-6.334856,-0.669556  
 H,0,-1.255995,-7.396928,-0.822537  
 B,0,-0.486401,2.969035,-0.386082  
 C,0,-0.31117,1.369428,-0.542039  
 C,0,6.417523,0.492247,-0.967274  
 C,0,3.857564,1.472768,-0.607194  
 C,0,4.028784,0.064198,-0.623792  
 C,0,5.345387,-0.382764,-0.810353  
 H,0,5.523976,-1.455517,-0.842961  
 C,0,4.926876,2.365868,-0.771264  
 H,0,4.746167,3.438517,-0.785918  
 C,0,6.213299,1.872414,-0.945938  
 H,0,7.045075,2.556833,-1.079232  
 P,0,2.216861,2.17474,-0.448661  
 C,0,1.370005,-0.446467,-0.534904  
 C,0,2.9235,-1.914217,0.960578  
 C,0,2.539114,3.368268,2.117615  
 H,0,3.590638,3.090159,2.11289  
 C,0,1.715104,3.064579,1.038444  
 C,0,1.003985,0.884584,-0.55717  
 C,0,3.824588,-1.742104,2.012832  
 H,0,4.579457,-0.961528,1.94363  
 C,0,0.341902,3.390842,0.976554  
 C,0,1.968602,-2.944265,1.123502  
 C,0,1.905706,-3.773316,2.238718  
 H,0,1.150533,-4.552294,2.314605  
 C,0,3.779331,-2.557559,3.148186

|                                                                                     |                                                                                                                                                                                                                                                                                                                                                                                                                                                                                                                                                                                                                                                                                                                                                                                                                                                                                                                                                                                                                                                                                                                                                                                                                                                                                                                                                                                                                                         |
|-------------------------------------------------------------------------------------|-----------------------------------------------------------------------------------------------------------------------------------------------------------------------------------------------------------------------------------------------------------------------------------------------------------------------------------------------------------------------------------------------------------------------------------------------------------------------------------------------------------------------------------------------------------------------------------------------------------------------------------------------------------------------------------------------------------------------------------------------------------------------------------------------------------------------------------------------------------------------------------------------------------------------------------------------------------------------------------------------------------------------------------------------------------------------------------------------------------------------------------------------------------------------------------------------------------------------------------------------------------------------------------------------------------------------------------------------------------------------------------------------------------------------------------------|
|                                                                                     | <p>B,0,2.863677,-1.044055,-0.434829<br/> C,0,1.976911,4.026663,3.211275<br/> H,0,2.592363,4.27504,4.070556<br/> C,0,0.622418,4.356282,3.195782<br/> C,0,-0.18179,4.041749,2.095977<br/> H,0,-1.235596,4.311311,2.108793<br/> C,0,2.829212,-3.57061,3.264741<br/> H,0,2.802432,-4.198194,4.150171<br/> C,0,-3.813378,-2.254116,1.917745<br/> H,0,-3.50445,-3.293508,2.003957<br/> H,0,-4.90451,1.456831,1.688481<br/> H,0,-5.809239,0.009661,3.482217<br/> O,0,2.172125,-4.008125,-2.478877<br/> C,0,2.166492,-3.107509,-1.681648<br/> O,0,2.991572,-2.109245,-1.575278<br/> O,0,0.314731,3.627637,-1.562041<br/> C,0,1.579351,3.40304,-1.757156<br/> O,0,2.306679,3.870724,-2.59403<br/> O,0,-3.339586,-1.593724,-1.922336<br/> C,0,-3.815614,-0.541376,-2.285484<br/> O,0,-4.470151,0.058669,-3.066918<br/> H,0,-3.663574,6.48304,-0.494647<br/> H,0,-5.111086,-2.368861,3.633419<br/> H,0,-3.56459,-6.482066,-0.738071<br/> H,0,4.495374,-2.400755,3.950188<br/> H,0,7.418707,0.096953,-1.115125<br/> H,0,0.185808,4.865097,4.050926</p>                                                                                                                                                                                                                                                                                                                                                                                              |
| 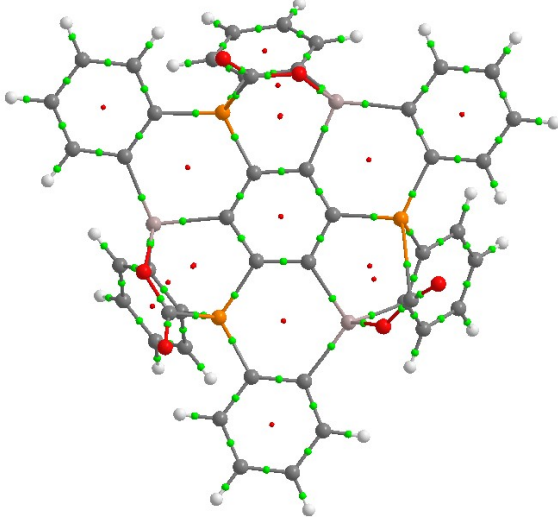 | <p><b>2CO<sub>2</sub>-Al<sub>3</sub>P<sub>3</sub>-NG/CO<sub>2</sub></b><br/> <b>E=-3931,99895508H; FreqIm=1</b><br/> C,3.9579403098,3.0947268097,3.2849185195<br/> C,3.4935365491,1.5531440544,1.0449959852<br/> C,2.7644819667,2.7598485376,1.1738854569<br/> C,4.4237404961,1.1154891222,1.990233945<br/> C,4.6550159936,1.8998787509,3.1192664805<br/> P,-2.0684190214,2.5009857635,-0.6038971861<br/> P,3.1346071285,0.5619254978,-0.4445173051<br/> C,0.5414459175,1.3545863933,-0.4307238771<br/> C,0.0771026847,4.4961845036,-0.4045250763<br/> C,-0.8367980394,1.1391616686,-0.4406925698<br/> C,5.5942395063,-0.4725056677,-0.8376387352<br/> H,5.867907943,0.5778693168,-0.900158756<br/> C,4.2570557975,-0.8487012167,-0.6365886515<br/> C,1.3520376081,0.2011562573,-0.438239114<br/> C,0.4104768087,5.8636772195,-0.4020722256<br/> H,1.4581441702,6.1520799098,-0.3242000111<br/> C,3.8613467733,-2.2096962723,-0.5827169616<br/> C,-1.2996553812,4.1747596291,-0.5133479<br/> C,-2.2575549612,5.1949685528,-0.6509138316<br/> H,-3.3095436511,4.938186244,-0.7714060356<br/> C,-0.5422096763,6.8742302008,-0.5031364333<br/> Al,1.4540856399,3.097858484,-0.3068136821<br/> C,6.5770424989,-1.4462401153,-0.9769930133<br/> H,7.6093794514,-1.1515954619,-1.1383039424<br/> C,6.2235924925,-2.792209597,-0.9197989247<br/> C,4.891262078,-3.1546365245,-0.7283487058<br/> H,4.6459884804,-4.2150490826,-0.7003000986</p> |

|                                                                                                                                                                                                                                                                                                                                                                                                                                                                                                                                                                                                                                                                                                                                                                                                                                                                                                                                                                                                                                                                                                                                                                                                                                                                                                                                                                                                                                                                                                                                                                                                                                                                                                                                                                                                                                                                                                                                                                                                                                                                                                                                                                                                                                                                                                                                                                                                                                                                                                                                                                                                                                                                               |
|-------------------------------------------------------------------------------------------------------------------------------------------------------------------------------------------------------------------------------------------------------------------------------------------------------------------------------------------------------------------------------------------------------------------------------------------------------------------------------------------------------------------------------------------------------------------------------------------------------------------------------------------------------------------------------------------------------------------------------------------------------------------------------------------------------------------------------------------------------------------------------------------------------------------------------------------------------------------------------------------------------------------------------------------------------------------------------------------------------------------------------------------------------------------------------------------------------------------------------------------------------------------------------------------------------------------------------------------------------------------------------------------------------------------------------------------------------------------------------------------------------------------------------------------------------------------------------------------------------------------------------------------------------------------------------------------------------------------------------------------------------------------------------------------------------------------------------------------------------------------------------------------------------------------------------------------------------------------------------------------------------------------------------------------------------------------------------------------------------------------------------------------------------------------------------------------------------------------------------------------------------------------------------------------------------------------------------------------------------------------------------------------------------------------------------------------------------------------------------------------------------------------------------------------------------------------------------------------------------------------------------------------------------------------------------|
| <p> C,-1.887610267,6.535034286,-0.6316933393<br/> H,-2.6454184709,7.3071751491,-0.7294786799<br/> Al,1.9742594635,-2.7528570988,-0.3630437806<br/> C,0.8877635748,-1.1085494044,-0.4193998723<br/> C,-5.5114657903,-4.0245726428,-0.4498881039<br/> C,-2.8365176737,-3.2721437565,-0.4119601096<br/> C,-3.8170908752,-2.2583430492,-0.2760932451<br/> C,-5.1553987146,-2.6854680712,-0.2966148436<br/> H,-5.9511115295,-1.9486747959,-0.1954435778<br/> C,-3.1831121973,-4.6212535638,-0.5767404051<br/> H,-2.4117657393,-5.3770538417,-0.7016028426<br/> C,-4.5226888096,-4.9951227979,-0.595264937<br/> H,-4.7894353217,-6.0389630701,-0.72839259<br/> P,-1.0540187048,-2.9625269221,-0.3405112072<br/> C,-1.4087835056,-0.1559186425,-0.4354722903<br/> C,-3.8496053693,1.0902735357,1.0439428535<br/> C,-1.0751603406,-4.3097869173,2.1218459844<br/> H,-2.1600014307,-4.3047088488,2.0481433176<br/> C,-0.2838944184,-3.7393241243,1.1221505444<br/> C,-0.5160379225,-1.2273761596,-0.4033474043<br/> C,-4.7030710964,0.9590799894,2.1475665417<br/> H,-5.266848173,0.0369430363,2.2843098522<br/> C,1.1311575286,-3.7150339237,1.1754144984<br/> C,-3.1160224457,2.3012697127,0.9203866931<br/> C,-3.2574034546,3.3197049044,1.8658899659<br/> H,-2.6855709748,4.2392410299,1.7745444201<br/> C,-4.856836017,1.9807387627,3.0869364774<br/> Al,-3.3333683901,-0.35092207,-0.1847762297<br/> C,-0.4521732262,-4.8863699619,3.2276569921<br/> H,-1.0530007962,-5.3326534753,4.0144137107<br/> C,0.9378863302,-4.8835048306,3.3172060368<br/> C,1.7092715661,-4.3029080063,2.3072400685<br/> H,2.7929386598,-4.3112602807,2.409594266<br/> C,-4.1274845583,3.1571249838,2.9455768666<br/> H,-4.2257863959,3.9528462406,3.678955505<br/> C,3.0279865639,3.5088594955,2.3276956669<br/> H,2.4947465133,4.4440572705,2.4894736425<br/> H,4.9591945569,0.1786087476,1.8555241361<br/> H,5.3748569334,1.5752182986,3.8647849344<br/> O,-4.0725553313,2.3465304913,-3.2261957073<br/> C,-3.9364176055,1.4657569076,-2.4948092103<br/> O,-4.0211730078,0.4107604211,-1.9433009141<br/> O,1.1410742772,-3.6819435948,-1.733286018<br/> C,-0.1399066559,-3.8353330223,-1.7929287798<br/> O,-0.7948266503,-4.4457691924,-2.5988574878<br/> O,2.6347126605,2.8819840768,-1.7256428391<br/> C,3.3934212761,1.8465582501,-1.8575484732<br/> O,4.2168416256,1.6105529197,-2.7046986311<br/> H,-6.5595169828,-4.3105049577,-0.4626034937<br/> H,-5.5352535159,1.8550897389,3.9262195074<br/> H,-0.2381340312,7.9172985309,-0.4958349833<br/> H,4.1384581667,3.7063320577,4.1650235362<br/> H,6.9847346172,-3.5594842507,-1.0317612272<br/> H,1.4235185127,-5.3339895414,4.1787498549 </p> |
|-------------------------------------------------------------------------------------------------------------------------------------------------------------------------------------------------------------------------------------------------------------------------------------------------------------------------------------------------------------------------------------------------------------------------------------------------------------------------------------------------------------------------------------------------------------------------------------------------------------------------------------------------------------------------------------------------------------------------------------------------------------------------------------------------------------------------------------------------------------------------------------------------------------------------------------------------------------------------------------------------------------------------------------------------------------------------------------------------------------------------------------------------------------------------------------------------------------------------------------------------------------------------------------------------------------------------------------------------------------------------------------------------------------------------------------------------------------------------------------------------------------------------------------------------------------------------------------------------------------------------------------------------------------------------------------------------------------------------------------------------------------------------------------------------------------------------------------------------------------------------------------------------------------------------------------------------------------------------------------------------------------------------------------------------------------------------------------------------------------------------------------------------------------------------------------------------------------------------------------------------------------------------------------------------------------------------------------------------------------------------------------------------------------------------------------------------------------------------------------------------------------------------------------------------------------------------------------------------------------------------------------------------------------------------------|

**Table S4:** Molecular graphs, energies (in Hartree) and Cartesian coordinates (in Å) of the adducts in vacuum. Level of theory: M06-2X/6-311++G\*//M06-2X/6-31+G\*

|                                                                                   |                                                                                                                                                                                                                                                                                                                                                                                                                                                                                                                                                                                                                                                                                                                                                                                                                                                                                                                                                                                                                                                                                                                                                                                                                                                                                                                                                                                                                                                                                                                                                                                                                                                                                                                                                                                                                                                                                                                                                                                                                                                                                                                                                                                                                                                                                                                                                                                                                                                                                                                                                                                                              |
|-----------------------------------------------------------------------------------|--------------------------------------------------------------------------------------------------------------------------------------------------------------------------------------------------------------------------------------------------------------------------------------------------------------------------------------------------------------------------------------------------------------------------------------------------------------------------------------------------------------------------------------------------------------------------------------------------------------------------------------------------------------------------------------------------------------------------------------------------------------------------------------------------------------------------------------------------------------------------------------------------------------------------------------------------------------------------------------------------------------------------------------------------------------------------------------------------------------------------------------------------------------------------------------------------------------------------------------------------------------------------------------------------------------------------------------------------------------------------------------------------------------------------------------------------------------------------------------------------------------------------------------------------------------------------------------------------------------------------------------------------------------------------------------------------------------------------------------------------------------------------------------------------------------------------------------------------------------------------------------------------------------------------------------------------------------------------------------------------------------------------------------------------------------------------------------------------------------------------------------------------------------------------------------------------------------------------------------------------------------------------------------------------------------------------------------------------------------------------------------------------------------------------------------------------------------------------------------------------------------------------------------------------------------------------------------------------------------|
| 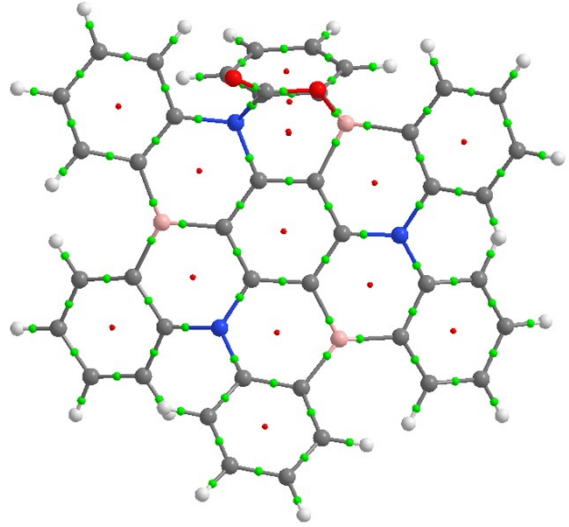 | <p><b>1CO<sub>2</sub>-B<sub>3</sub>N<sub>3</sub>-NG</b><br/> <b>E= -2042,3012114H; FreqIm=0</b></p> <p>C,-2.6745154959,-5.303445567,1.6179382291<br/> C,-2.4464254636,-2.7385933456,0.4715635423<br/> C,-1.3452977196,-3.6323865066,0.4219524133<br/> C,-3.6235009255,-3.1263659827,1.1418291643<br/> C,-3.7325398368,-4.3894241111,1.6970407287<br/> C,0.082075933,-1.588748845,-0.1530044136<br/> C,1.3249943852,-3.8026588898,-0.4684194611<br/> C,1.3252429389,-0.9143874985,-0.171712948<br/> C,-4.5913550295,-1.4607854171,-1.0406980901<br/> H,-4.5018509748,-2.5365696378,-1.1465223471<br/> C,-3.5294859582,-0.7177289874,-0.5053243588<br/> C,-1.1041621569,-0.8253488486,-0.1721855263<br/> C,1.3780152959,-5.1249652667,-0.9502349008<br/> H,0.4736733642,-5.7265531356,-0.9108028629<br/> C,-3.6011163221,0.6917051854,-0.4831877267<br/> C,2.4949763543,-3.0151522491,-0.5703674127<br/> C,3.6414824736,-3.537693819,-1.1912403555<br/> H,4.5137344321,-2.9095977672,-1.336754322<br/> C,2.5241581779,-5.6581012894,-1.5178410729<br/> B,0.0131864812,-3.0931567767,-0.060755088<br/> C,-5.7590552205,-0.8309245775,-1.4528645123<br/> H,-6.5686522136,-1.4292387327,-1.8608365487<br/> C,-5.8805206288,0.5550646922,-1.3617236094<br/> C,-4.7951954817,1.2928231815,-0.903551526<br/> H,-4.8503702497,2.3798837002,-0.8956900743<br/> C,3.6549652134,-4.8459973916,-1.6491895629<br/> H,4.5478441417,-5.2269276269,-2.1365829863<br/> B,-2.2881413521,1.5380954158,-0.229081769<br/> C,-1.0497462842,0.572529685,-0.2613034726<br/> C,3.6375169357,4.9492216369,-0.835087069<br/> C,1.3712286445,3.3991574681,-0.4062588385<br/> C,2.6255294452,2.767516931,-0.3715440829<br/> C,3.7469079317,3.583385249,-0.6161610847<br/> H,4.7272513348,3.1197060582,-0.6612452685<br/> C,1.2466464461,4.7741108253,-0.6077537228<br/> H,0.2647884366,5.2367937213,-0.6173215193<br/> C,2.3784249096,5.5502155054,-0.8112697846<br/> H,2.2728720982,6.618083146,-0.9748618662<br/> C,1.4075767717,0.4937310047,-0.205376726<br/> C,3.8888757149,0.3423584028,0.34270322<br/> C,-0.1967929486,3.8948438724,1.9383395381<br/> H,0.8186204405,4.2721814219,1.8989463551<br/> C,-0.718658694,3.0838961416,0.9401836749<br/> C,0.1817184345,1.1634016129,-0.2624441026<br/> C,5.0759920463,0.8498760664,0.9153138998<br/> H,5.2161513997,1.9257080398,0.9498595999<br/> C,-2.0087613089,2.5444929884,0.9871418816<br/> C,3.694403115,-1.0642365845,0.3687675692<br/> C,4.6550191498,-1.8884237278,0.9878223064<br/> H,4.4764205159,-2.9533981714,1.0793571218<br/> C,6.036627199,0.0339888523,1.4831732653</p> |
|-----------------------------------------------------------------------------------|--------------------------------------------------------------------------------------------------------------------------------------------------------------------------------------------------------------------------------------------------------------------------------------------------------------------------------------------------------------------------------------------------------------------------------------------------------------------------------------------------------------------------------------------------------------------------------------------------------------------------------------------------------------------------------------------------------------------------------------------------------------------------------------------------------------------------------------------------------------------------------------------------------------------------------------------------------------------------------------------------------------------------------------------------------------------------------------------------------------------------------------------------------------------------------------------------------------------------------------------------------------------------------------------------------------------------------------------------------------------------------------------------------------------------------------------------------------------------------------------------------------------------------------------------------------------------------------------------------------------------------------------------------------------------------------------------------------------------------------------------------------------------------------------------------------------------------------------------------------------------------------------------------------------------------------------------------------------------------------------------------------------------------------------------------------------------------------------------------------------------------------------------------------------------------------------------------------------------------------------------------------------------------------------------------------------------------------------------------------------------------------------------------------------------------------------------------------------------------------------------------------------------------------------------------------------------------------------------------------|

|                                                                                    |                                                                                                                                                                                                                                                                                                                                                                                                                                                                                                                                                                                                                                                                                                                                                                                                                                                                                                                                                                                                                                                                                                                                                                                                                                                                                                                                                                                                                                                                                                                                                                               |
|------------------------------------------------------------------------------------|-------------------------------------------------------------------------------------------------------------------------------------------------------------------------------------------------------------------------------------------------------------------------------------------------------------------------------------------------------------------------------------------------------------------------------------------------------------------------------------------------------------------------------------------------------------------------------------------------------------------------------------------------------------------------------------------------------------------------------------------------------------------------------------------------------------------------------------------------------------------------------------------------------------------------------------------------------------------------------------------------------------------------------------------------------------------------------------------------------------------------------------------------------------------------------------------------------------------------------------------------------------------------------------------------------------------------------------------------------------------------------------------------------------------------------------------------------------------------------------------------------------------------------------------------------------------------------|
|                                                                                    | <p>B,2.7143244526,1.2288554227,-0.1134034552<br/> C,-1.0202845725,4.2063383916,3.0236897671<br/> H,-0.6311661092,4.8351924885,3.818521377<br/> C,-2.3191960889,3.7099606644,3.0922627996<br/> C,-2.8045032696,2.8780715811,2.0806967553<br/> H,-3.8106005307,2.469725257,2.1437071026<br/> C,5.8086802286,-1.3466019823,1.5251320029<br/> H,6.5237439272,-2.0039481611,2.0115581126<br/> C,-1.5005802212,-4.9088254332,1.0020574211<br/> H,-0.6485386561,-5.5838681286,0.9970421068<br/> H,-4.4415018886,-2.423902856,1.2510181953<br/> H,-4.6460149493,-4.657459568,2.2205292865<br/> H,4.5245966521,5.5451709554,-1.0273589072<br/> H,-2.949271477,3.9601738023,3.9409621606<br/> H,6.9342076722,0.4578763026,1.9224904498<br/> H,-2.764112787,-6.2893533759,2.0633780275<br/> H,2.534651864,-6.6784332984,-1.8885616447<br/> H,-6.7928032558,1.0510309609,-1.6795261408<br/> O,-0.2992788722,3.5327430805,-2.5327624409<br/> C,-0.8628317027,2.961898988,-1.6608895872<br/> O,-2.0151815117,2.4921909807,-1.4922536976<br/> N,2.5052261043,-1.6574142214,-0.1286941666<br/> N,-2.3490101202,-1.4332404153,-0.070218423<br/> N,0.1040522156,2.6576855135,-0.2573635976</p>                                                                                                                                                                                                                                                                                                                                                                                                  |
| 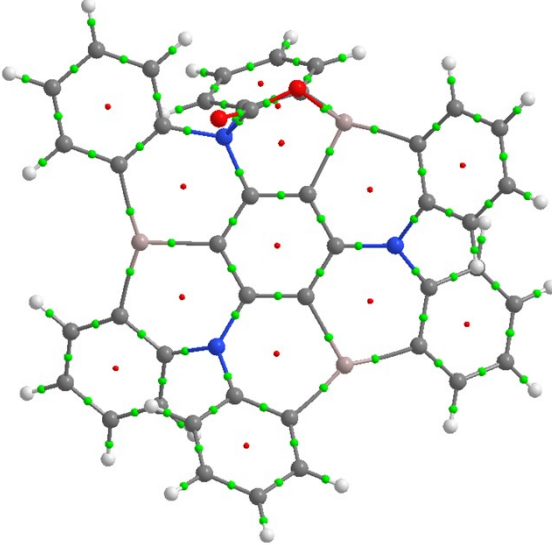 | <p><b>1CO<sub>2</sub>-Al<sub>3</sub>N<sub>3</sub>-NG</b><br/> <b>E= -2694,918696H; FreqIm=0</b><br/> C,6.068486629,0.0529828875,2.1907208938<br/> C,3.7490254584,-0.6709604117,0.7433917118<br/> C,4.1763283178,0.6837731966,0.7632229402<br/> C,4.4778274228,-1.6233754586,1.4847333426<br/> C,5.6157557893,-1.2692478422,2.1909196114<br/> C,1.2991952244,0.8940435615,-0.0586391524<br/> C,2.3501152037,3.6534963821,-0.56656044<br/> C,0.0380056386,1.5112148651,-0.119278162<br/> C,4.1123585448,-2.5028468027,-1.3655615697<br/> H,4.7403804277,-1.6173315088,-1.4069252884<br/> C,2.8920419123,-2.4438541819,-0.670828314<br/> C,1.3749524777,-0.5122697168,-0.1012855954<br/> C,3.1785019762,4.6148529508,-1.1761719817<br/> H,4.2577606526,4.5213344286,-1.070927502<br/> C,2.0461650588,-3.5811563027,-0.6430736259<br/> C,0.9473630877,3.7916846496,-0.7205303984<br/> C,0.4428537312,4.8474781018,-1.5014437252<br/> H,-0.6308407127,4.9364505765,-1.6397405192<br/> C,2.6721454077,5.6783528334,-1.9116027839<br/> C,4.5355870974,-3.6726487986,-1.9809776127<br/> H,5.4853398325,-3.6857918749,-2.5084100432<br/> C,3.7381579114,-4.8152019517,-1.9300849968<br/> C,2.5083079314,-4.7446075848,-1.2851375696<br/> H,1.8744661171,-5.6296753329,-1.2859413285<br/> C,1.290146856,5.7780722588,-2.0841580331<br/> H,0.8688631057,6.5794222527,-2.6846581743<br/> C,0.2189212011,-1.2957627694,-0.2164778986<br/> C,-6.3363297545,-0.7292987068,-1.0081767798<br/> C,-3.6038689203,-1.1477359491,-0.5743130096<br/> C,-4.1040522659,0.1611074609,-0.5117008312</p> |



|                                                                                                                                                                                                                                                                                                                                                                                                                                                                                                                                                                                                                                                                                                                                                                                                                                                                                                                                                                                                                                                                                                                                                                                                                                                                                                                                                                                                                                                                                                                                                                                                                                                                                                                                                                                                                                                                                                                                                                                                                                                                                                                                                                                                                      |
|----------------------------------------------------------------------------------------------------------------------------------------------------------------------------------------------------------------------------------------------------------------------------------------------------------------------------------------------------------------------------------------------------------------------------------------------------------------------------------------------------------------------------------------------------------------------------------------------------------------------------------------------------------------------------------------------------------------------------------------------------------------------------------------------------------------------------------------------------------------------------------------------------------------------------------------------------------------------------------------------------------------------------------------------------------------------------------------------------------------------------------------------------------------------------------------------------------------------------------------------------------------------------------------------------------------------------------------------------------------------------------------------------------------------------------------------------------------------------------------------------------------------------------------------------------------------------------------------------------------------------------------------------------------------------------------------------------------------------------------------------------------------------------------------------------------------------------------------------------------------------------------------------------------------------------------------------------------------------------------------------------------------------------------------------------------------------------------------------------------------------------------------------------------------------------------------------------------------|
| <p> C,-5.4862470966,0.3320304522,-0.7368401831<br/> H,-5.903757426,1.3360565153,-0.6956087341<br/> C,-4.4563094758,-2.2246610327,-0.847876822<br/> H,-4.0569261223,-3.2360837983,-0.8769974998<br/> C,-5.8085571846,-2.0207047035,-1.0657867974<br/> H,-6.4494290411,-2.8702833047,-1.2804013517<br/> C,-1.14924824,0.7522105015,-0.2036269404<br/> C,-2.4957178926,3.3561025988,0.427595966<br/> C,-3.190174586,-2.1661495694,1.9241164779<br/> H,-3.9399894949,-1.4004427517,1.7624657729<br/> C,-2.2040989787,-2.4389906638,0.9737203688<br/> C,-0.9884424067,-0.628065418,-0.2427528272<br/> C,-3.424239771,4.2208510693,1.0401467103<br/> H,-4.48483222,3.9845419353,0.9737133016<br/> C,-1.2051685276,-3.4036691481,1.1980310693<br/> C,-1.1154019814,3.6752193512,0.5248153072<br/> C,-0.733928808,4.815070966,1.2610420888<br/> H,0.3216150997,5.0480811163,1.3639301412<br/> C,-3.040353621,5.3623333599,1.7281486533<br/> C,-3.2196128154,-2.896251776,3.1108571181<br/> H,-3.9877520677,-2.6783303486,3.8467958758<br/> C,-2.2762782832,-3.891010538,3.3446789116<br/> C,-1.2821253804,-4.1237789125,2.3961933931<br/> H,-0.5293090372,-4.8810753354,2.6036484827<br/> C,-1.6769202543,5.6440738401,1.8470716337<br/> H,-1.3441779471,6.5110107377,2.410992668<br/> C,5.3370943914,1.0041773204,1.4952032884<br/> H,5.6736269718,2.039225761,1.517962234<br/> H,4.1394707019,-2.6549824194,1.4949154403<br/> H,6.1484853605,-2.0301322432,2.7546077371<br/> H,-7.3956070158,-0.5594699244,-1.1758240413<br/> H,-2.3038314865,-4.4670634538,4.2653181338<br/> H,-3.7818210054,6.012612242,2.1822348236<br/> H,6.9634183956,0.3320549038,2.7386660055<br/> H,3.3392136851,6.4072488403,-2.3620043166<br/> H,4.0608006476,-5.7367430727,-2.4059246319<br/> O,-2.2794343274,-1.9050616909,-2.7244661174<br/> C,-1.7918627432,-2.4352153104,-1.7837386307<br/> O,-1.050606254,-3.4230926689,-1.5797617532<br/> N,-0.0434999833,2.9456116488,-0.0977376731<br/> N,2.6327796388,-1.1795684027,-0.0029220625<br/> N,-2.1942672855,-1.5944006199,-0.3048563096<br/> Al,-2.8281976687,1.5715455995,-0.1862871084<br/> Al,0.1935734561,-3.2243965585,-0.1690067471<br/> Al,2.872833721,1.917604694,0.0824987805 </p> |
|----------------------------------------------------------------------------------------------------------------------------------------------------------------------------------------------------------------------------------------------------------------------------------------------------------------------------------------------------------------------------------------------------------------------------------------------------------------------------------------------------------------------------------------------------------------------------------------------------------------------------------------------------------------------------------------------------------------------------------------------------------------------------------------------------------------------------------------------------------------------------------------------------------------------------------------------------------------------------------------------------------------------------------------------------------------------------------------------------------------------------------------------------------------------------------------------------------------------------------------------------------------------------------------------------------------------------------------------------------------------------------------------------------------------------------------------------------------------------------------------------------------------------------------------------------------------------------------------------------------------------------------------------------------------------------------------------------------------------------------------------------------------------------------------------------------------------------------------------------------------------------------------------------------------------------------------------------------------------------------------------------------------------------------------------------------------------------------------------------------------------------------------------------------------------------------------------------------------|

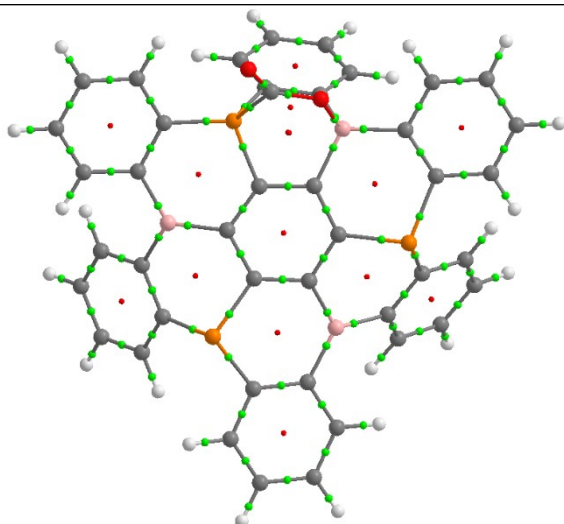

**1CO<sub>2</sub>-B<sub>3</sub>P<sub>3</sub>-NG**

**E= -2902,05998522H; FreqIm=0**

C,0,4.9527411933,-0.3637281649,2.4737094444  
 C,0,3.5116582378,-1.2655498848,0.2483270298  
 C,0,3.5383697913,0.1245453467,0.5352778624  
 C,0,4.2246718006,-2.1666882211,1.0402591276  
 C,0,4.939472313,-1.7180440545,2.1501476755  
 P,0,0.294024268,3.245517421,-1.03688722  
 P,0,2.5947212627,-1.7938644324,-1.2607184314  
 C,0,1.2990902228,0.6076129488,-0.8168554794  
 C,0,2.9809693604,2.6817216292,-0.3023424604  
 C,0,0.1747242495,1.4520846104,-0.8311876424  
 C,0,3.0830904451,-4.4914422912,-1.1782382738  
 H,0,4.1136859669,-4.1670283142,-1.3151654817  
 C,0,2.0617147459,-3.5346173416,-1.0447643264  
 C,0,1.1049085828,-0.7947460328,-0.9666671325  
 C,0,4.3142220313,3.1197941664,-0.1696036362  
 H,0,5.0969857872,2.378318447,-0.0344498765  
 C,0,0.714135671,-3.9411754114,-0.965541022  
 C,0,1.9954918524,3.6707355544,-0.5459207564  
 C,0,2.3563759596,5.0231746922,-0.6337687873  
 H,0,1.6044138123,5.7695829384,-0.8824886075  
 C,0,4.6638466652,4.4635506801,-0.2315645645  
 B,0,2.6506878504,1.1530686804,-0.2558999654  
 C,0,2.7965771575,-5.8510884644,-1.1722671647  
 H,0,3.5999624494,-6.5765273193,-1.2647106426  
 C,0,1.4690137596,-6.2705345327,-1.0814236413  
 C,0,0.4557885195,-5.3222850712,-0.9914950955  
 H,0,-0.5801630535,-5.654608077,-0.9438409678  
 C,0,3.6751957134,5.4230345436,-0.4484087461  
 H,0,3.9350824863,6.4761397755,-0.5078948202  
 B,0,-0.5266221151,-2.9428172635,-0.8321437053  
 C,0,-0.1687719865,-1.3646268576,-0.9675106574  
 C,0,-6.2061519969,1.6418276189,-1.1533070996  
 C,0,-4.1422390791,-0.1642706811,-0.8137732416  
 C,0,-3.8437502733,1.2153288161,-0.6778966265  
 C,0,-4.9198955551,2.0976144603,-0.8642362712  
 H,0,-4.7400878549,3.1675148334,-0.8017022496  
 C,0,-5.4264611381,-0.6355139857,-1.0940959989  
 H,0,-5.6051461429,-1.7008919979,-1.214603159  
 C,0,-6.465938455,0.2773211905,-1.2576852523  
 H,0,-7.4665658541,-0.0765742646,-1.4850339048  
 P,0,-2.7897205216,-1.3243826855,-0.7178439866  
 C,0,-1.1434525594,0.9295400744,-0.8187476525  
 C,0,-2.1237587096,3.1030697778,0.3628308961  
 C,0,-3.3854318969,-2.4156005524,1.8465880022  
 H,0,-4.2865158234,-1.8095828229,1.9068595499  
 C,0,-2.55979184,-2.3665356574,0.7269685224  
 C,0,-1.2347255259,-0.4623024611,-0.8759308915  
 C,0,-3.0542143957,3.5682874695,1.3111007036  
 H,0,-3.997569987,3.041134338,1.4293477847  
 C,0,-1.3785850848,-3.1195301225,0.5722764591  
 C,0,-0.8775210415,3.7807578946,0.2768099775  
 C,0,-0.6214434938,4.8903134307,1.0839535551  
 H,0,0.3344443091,5.4026424094,1.0244929933  
 C,0,-2.7883624638,4.66116088,2.1302755086

|                                                                                    |                                                                                                                                                                                                                                                                                                                                                                                                                                                                                                                                                                                                                                                                                                                                                                                                                                                                                                                                                                                                                                                                                                                                                                                                                                                                                                                                                                                                                                                                                                                                                                                                                                                                                                                                    |
|------------------------------------------------------------------------------------|------------------------------------------------------------------------------------------------------------------------------------------------------------------------------------------------------------------------------------------------------------------------------------------------------------------------------------------------------------------------------------------------------------------------------------------------------------------------------------------------------------------------------------------------------------------------------------------------------------------------------------------------------------------------------------------------------------------------------------------------------------------------------------------------------------------------------------------------------------------------------------------------------------------------------------------------------------------------------------------------------------------------------------------------------------------------------------------------------------------------------------------------------------------------------------------------------------------------------------------------------------------------------------------------------------------------------------------------------------------------------------------------------------------------------------------------------------------------------------------------------------------------------------------------------------------------------------------------------------------------------------------------------------------------------------------------------------------------------------|
|                                                                                    | <p>B,0,-2.3843673723,1.7768548955,-0.4233802986<br/> C,0,-3.01415127,-3.2574683307,2.8935789018<br/> H,0,-3.6308270222,-3.320475645,3.7849518712<br/> C,0,-1.8434884196,-4.0097713763,2.7912317874<br/> C,0,-1.0387418929,-3.9416621022,1.6504709381<br/> H,0,-0.1321137565,-4.5397424343,1.5962385979<br/> C,0,-1.5681439086,5.3227275485,2.0113457896<br/> H,0,-1.3415406409,6.1698686809,2.6528888378<br/> C,0,4.2596123794,0.5378811753,1.6704946317<br/> H,0,4.2524208234,1.5885311172,1.9486323497<br/> H,0,4.1939676035,-3.2302895045,0.8220869958<br/> H,0,5.4686231246,-2.4345142671,2.7727042476<br/> H,0,5.7028830254,4.7620153588,-0.1276542563<br/> H,0,5.4919815151,-0.0129868383,3.3487190566<br/> H,0,1.2272032217,-7.329727471,-1.0984878066<br/> H,0,-1.5534654625,-4.6595285225,3.6125098582<br/> H,0,-7.0089365111,2.3580805436,-1.3022934787<br/> H,0,-3.5220039399,4.989257141,2.8604143294<br/> C,0,-2.6769064558,-2.6325857986,-2.0922197652<br/> O,0,-1.5655615447,-3.2781515137,-1.9762626328<br/> O,0,-3.5739031125,-2.7782803187,-2.884059608</p>                                                                                                                                                                                                                                                                                                                                                                                                                                                                                                                                                                                                                                                      |
| 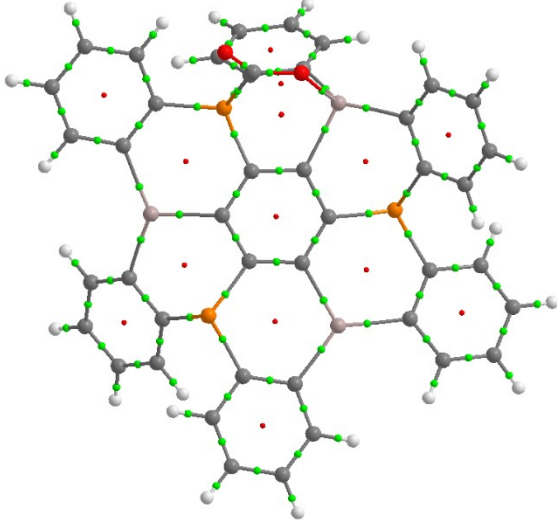 | <p><b>1CO<sub>2</sub>-Al<sub>3</sub>P<sub>3</sub>-NG</b><br/> <b>E= -3554,75305862H; FreqIm=0</b><br/> C,5.7501554196,-3.6450447317,1.2417458916<br/> C,3.018260623,-3.0261099375,0.9371992049<br/> C,3.9949558605,-2.0597447418,0.5929811638<br/> C,3.4304990934,-4.2608857871,1.4725568076<br/> C,4.7764757687,-4.5757285314,1.6076451757<br/> P,1.8224151119,2.6363142157,-1.0222503953<br/> P,1.1805534686,-2.8190327284,0.9461425602<br/> C,1.5100254111,-0.110479809,-0.0933816549<br/> C,4.3793299529,1.3346661249,-0.3755435135<br/> C,0.9138259912,1.1259125762,-0.4220319392<br/> C,1.4126798182,-5.0192060267,-0.8700230125<br/> H,2.4892638349,-4.9056533158,-0.786591071<br/> C,0.5486592252,-4.1242929617,-0.2305655177<br/> C,0.6694348063,-1.2236907921,0.1461986738<br/> C,5.7853273497,1.4242988836,-0.3644277129<br/> H,6.3723722034,0.5689288953,-0.0353648924<br/> C,-0.8568484594,-4.254163474,-0.3827706938<br/> C,3.6515622108,2.4676693728,-0.8115941699<br/> C,4.3442071619,3.6079089721,-1.2579892385<br/> H,3.7864641535,4.4623774925,-1.6386340542<br/> C,6.4622776587,2.5719271239,-0.7615400886<br/> C,0.9053406199,-6.0680155721,-1.6381631738<br/> H,1.591860169,-6.7532073981,-2.1284592344<br/> C,-0.4685082978,-6.2248909682,-1.7847396449<br/> C,-1.3286343532,-5.3080486961,-1.1788753465<br/> H,-2.3996454695,-5.4151404015,-1.3434949371<br/> C,5.7318320635,3.669426009,-1.2177667368<br/> H,6.2421978484,4.5672759869,-1.5549345105<br/> C,-0.7281827145,-1.1461404498,-0.0036447615<br/> C,-5.4181182238,4.0115615389,-0.8978852337<br/> C,-3.9096789251,1.6984326014,-0.5543569302<br/> C,-3.2474989245,2.9495345746,-0.5019085354<br/> C,-4.0439317902,4.0931022708,-0.6771159525</p> |

|  |                                                                                                                                                                                                                                                                                                                                                                                                                                                                                                                                                                                                                                                                                                                                                                                                                                                                                                                                                                                                                                                                                                                                                                                                                                                                                                                                                                                                                                                                                                                                                                                                                                                                                                                                                                                                                                                                                                                                                                                                                                                                    |
|--|--------------------------------------------------------------------------------------------------------------------------------------------------------------------------------------------------------------------------------------------------------------------------------------------------------------------------------------------------------------------------------------------------------------------------------------------------------------------------------------------------------------------------------------------------------------------------------------------------------------------------------------------------------------------------------------------------------------------------------------------------------------------------------------------------------------------------------------------------------------------------------------------------------------------------------------------------------------------------------------------------------------------------------------------------------------------------------------------------------------------------------------------------------------------------------------------------------------------------------------------------------------------------------------------------------------------------------------------------------------------------------------------------------------------------------------------------------------------------------------------------------------------------------------------------------------------------------------------------------------------------------------------------------------------------------------------------------------------------------------------------------------------------------------------------------------------------------------------------------------------------------------------------------------------------------------------------------------------------------------------------------------------------------------------------------------------|
|  | <p> H,-3.5802410492,5.0776617771,-0.6492660596<br/> C,-5.2881534254,1.6071340915,-0.7869792074<br/> H,-5.7732900236,0.6362811782,-0.8452062428<br/> C,-6.0396904906,2.7664503193,-0.9578482212<br/> H,-7.1068341932,2.692940099,-1.1432241046<br/> P,-3.0755456089,0.1123297094,-0.2853317123<br/> C,-0.4887859039,1.2853695307,-0.4620485973<br/> C,-0.0198484582,4.324596431,0.316120199<br/> C,-4.5026404398,-0.0176639304,2.1225797034<br/> H,-4.7996627137,1.0103185299,1.9290861226<br/> C,-3.6725171609,-0.707659295,1.2348209387<br/> C,-1.2499152626,0.1246950808,-0.2606844428<br/> C,-0.3662218907,5.3975751863,1.1497704565<br/> H,-1.4096898793,5.6975383153,1.2377484698<br/> C,-3.2568953161,-2.0459340069,1.445145533<br/> C,1.3468894972,3.9395513507,0.2367491822<br/> C,2.2993627549,4.6289727197,0.9919706445<br/> H,3.3439617684,4.334428786,0.9634899371<br/> C,0.5938403137,6.0995957237,1.8793718066<br/> C,-4.9481193136,-0.666133582,3.2728497764<br/> H,-5.5916663858,-0.142598909,3.9735608896<br/> C,-4.5620749947,-1.9823382464,3.515734052<br/> C,-3.7293807618,-2.6519927122,2.6160171521<br/> H,-3.4415876401,-3.6774625042,2.8377566949<br/> C,1.923834215,5.7006304525,1.8055065696<br/> H,2.6814830376,6.2179530959,2.3879458423<br/> C,5.3516449615,-2.4050729963,0.7577081161<br/> H,6.1229311937,-1.6814995417,0.4996255167<br/> H,2.6827103202,-4.9893953529,1.7817001851<br/> H,5.0657340702,-5.5431266966,2.0088159227<br/> H,-6.0021364808,4.9177115783,-1.031431414<br/> H,-4.9099775458,-2.4897413995,4.4116213625<br/> H,0.3041856794,6.9377645936,2.5064809295<br/> H,6.8049377035,-3.8811833055,1.3497139832<br/> H,7.5476005485,2.6076264226,-0.7336794009<br/> H,-0.867974846,-7.0407056153,-2.3810435004<br/> O,-4.3003149429,-0.7812657718,-2.5356232369<br/> C,-3.561694664,-1.1428402078,-1.6541475534<br/> O,-3.0261722733,-2.2908560528,-1.4440042095<br/> Al,-1.97700575,-2.7001099166,0.0464303054<br/> Al,3.4147815687,-0.2957735135,0.0466973475<br/> Al,-1.2997878842,3.0274512694,-0.3449062616 </p> |
|--|--------------------------------------------------------------------------------------------------------------------------------------------------------------------------------------------------------------------------------------------------------------------------------------------------------------------------------------------------------------------------------------------------------------------------------------------------------------------------------------------------------------------------------------------------------------------------------------------------------------------------------------------------------------------------------------------------------------------------------------------------------------------------------------------------------------------------------------------------------------------------------------------------------------------------------------------------------------------------------------------------------------------------------------------------------------------------------------------------------------------------------------------------------------------------------------------------------------------------------------------------------------------------------------------------------------------------------------------------------------------------------------------------------------------------------------------------------------------------------------------------------------------------------------------------------------------------------------------------------------------------------------------------------------------------------------------------------------------------------------------------------------------------------------------------------------------------------------------------------------------------------------------------------------------------------------------------------------------------------------------------------------------------------------------------------------------|

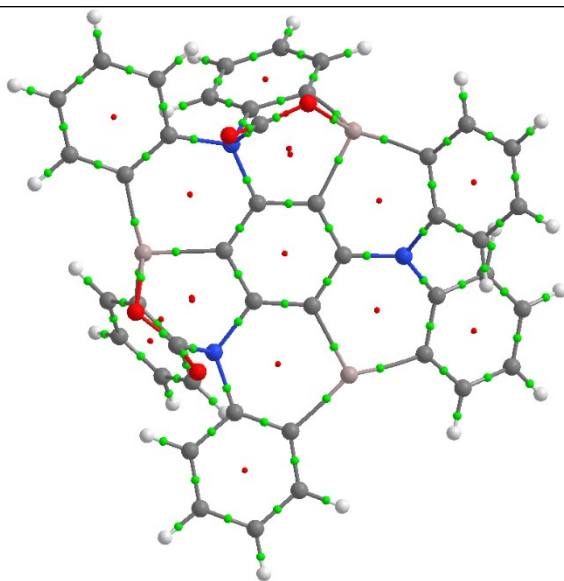

**2CO<sub>2</sub>-Al<sub>3</sub>N<sub>3</sub>-NG**

**E= -2883,5069172H; FreqIm=0**

C,2.4667509518,5.6979114337,1.9676607707  
 C,2.2667104247,3.1945716595,0.6552939792  
 C,1.1805659322,4.1121094666,0.6086729518  
 C,3.4135008752,3.5472684599,1.3986961341  
 C,3.5124069474,4.7718840902,2.0364721304  
 N,-2.6263582616,0.9665498841,-0.2946891898  
 N,2.3168869944,1.9295687155,-0.0137436121  
 C,-0.1198578458,1.5232055863,-0.1579930014  
 C,-2.3467207255,3.5524075506,-0.3829451526  
 C,-1.1356710051,0.5820776739,-0.2159113567  
 C,4.17396657,2.6675967094,-1.3566757841  
 H,3.6170141093,3.5924384909,-1.4783961883  
 C,3.603868935,1.6183536072,-0.6162098857  
 C,1.2083291719,1.0329867618,-0.1071073731  
 C,-3.0283757357,4.7740918201,-0.5665913695  
 H,-2.4716924433,5.7041009667,-0.4708904866  
 C,4.3008175672,0.3902497869,-0.4870184958  
 C,-3.0995618784,2.3759551492,-0.5169849658  
 C,-4.4658202103,2.4334313919,-0.8185064977  
 H,-5.0402532786,1.5136388503,-0.9030006646  
 C,-4.3810576104,4.8387797524,-0.8646054105  
 Al,-0.4545156573,3.3647091435,-0.0441281116  
 C,5.4379046543,2.5504038789,-1.9178057833  
 H,5.8511674985,3.3807653366,-2.483455385  
 C,6.1605081036,1.3680605262,-1.7648575685  
 C,5.5760524627,0.3104972225,-1.0767263026  
 H,6.1304202765,-0.6233036132,-1.0010537833  
 C,-5.1026696688,3.650525221,-0.9935865787  
 H,-6.1618853847,3.670266393,-1.2305618483  
 Al,3.2128495991,-1.1484450494,0.0090970898  
 C,1.4642433429,-0.3386398769,-0.1426462075  
 C,-1.7514788322,-6.0963975898,-0.8887619691  
 C,-0.253511797,-3.7745627148,-0.4612218882  
 C,-1.6541362173,-3.6690031695,-0.488352972  
 C,-2.3679526577,-4.8671090994,-0.7075916849  
 H,-3.4551193751,-4.8272655524,-0.7377697274  
 C,0.3783977813,-5.0115438798,-0.644428314  
 H,1.4638259567,-5.0740419966,-0.6077554766  
 C,-0.3581918462,-6.1640215009,-0.8572704753  
 H,0.1554267087,-7.1097794785,-0.9998478955  
 N,0.7553847097,-2.6808867172,-0.1901361741  
 C,-0.9434209347,-0.7951536003,-0.2301786902  
 C,-3.5202869621,-0.9661830819,1.1073519087  
 C,0.7669630145,-3.7398209233,2.0818932747  
 H,-0.2285928266,-4.1196805303,1.8847887756  
 C,1.4621145978,-2.9849017891,1.135567337  
 C,0.3742169899,-1.1936887162,-0.1955253094  
 C,-4.171932343,-1.3864733079,2.2732910098  
 H,-4.329935345,-2.4509199148,2.4330966741  
 C,2.7337043203,-2.4449800845,1.405882483  
 C,-3.3415039468,0.4189166116,0.9449886972  
 C,-3.7380365462,1.3320481725,1.924294726  
 H,-3.569795596,2.3967455342,1.8118644648  
 C,-4.6071803654,-0.4910534563,3.2480470856

|                                                                                    |                                                                                                                                                                                                                                                                                                                                                                                                                                                                                                                                                                                                                                                                                                                                                                                                                                                                                                                                                                                                                                                                                                                                                                                                                                                              |
|------------------------------------------------------------------------------------|--------------------------------------------------------------------------------------------------------------------------------------------------------------------------------------------------------------------------------------------------------------------------------------------------------------------------------------------------------------------------------------------------------------------------------------------------------------------------------------------------------------------------------------------------------------------------------------------------------------------------------------------------------------------------------------------------------------------------------------------------------------------------------------------------------------------------------------------------------------------------------------------------------------------------------------------------------------------------------------------------------------------------------------------------------------------------------------------------------------------------------------------------------------------------------------------------------------------------------------------------------------|
|                                                                                    | <p>Al,-2.4939530728,-1.9237717938,-0.2611392782<br/> C,1.3633767521,-4.0152493179,3.3110641309<br/> H,0.8176010805,-4.602790256,4.0432013519<br/> C,2.6403450318,-3.5420239005,3.5924049652<br/> C,3.300202667,-2.7588716596,2.6472055305<br/> H,4.2839487943,-2.363919773,2.8912418096<br/> C,-4.3709672159,0.8688166376,3.076034564<br/> H,-4.6764572213,1.5831124033,3.8346228341<br/> C,1.319490028,5.3479378367,1.2739939792<br/> H,0.492678794,6.0556542158,1.2436650831<br/> H,4.23465963,2.8406567123,1.4663874122<br/> H,4.4102192394,5.0024148125,2.6032159815<br/> O,-2.9156177283,0.9451597433,-2.7246756542<br/> C,-3.0262139565,0.1929441573,-1.8182122452<br/> O,-3.3310094167,-1.0158759186,-1.6755135775<br/> O,2.9429981391,-2.4065085384,-1.363148778<br/> C,1.7536222877,-2.7273266849,-1.6056936692<br/> O,1.1369541226,-3.0259032042,-2.5724138758<br/> H,7.1514015405,1.2654193732,-2.1975840664<br/> H,2.5452432592,6.6607984559,2.4630099828<br/> H,-4.8716247937,5.7981388009,-0.9983705443<br/> H,-5.1085294021,-0.8514367574,4.1417753016<br/> H,-2.3434940744,-6.991515229,-1.0551673353<br/> H,3.1095753165,-3.7642483191,4.5466881847</p>                                                                                     |
| 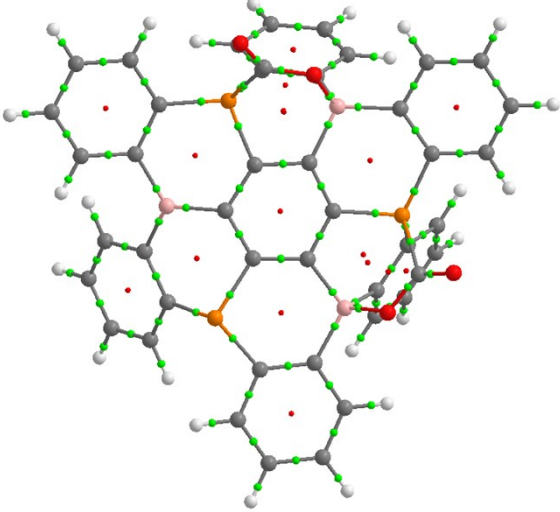 | <p><b>2CO<sub>2</sub>-B<sub>3</sub>P<sub>3</sub>-NG</b><br/> <b>E= -3090,65894931H; FreqIm=0</b><br/> C,0,1.191862,5.532423,1.990475<br/> C,0,1.915692,3.543629,0.137518<br/> C,0,0.539281,3.874849,0.309093<br/> C,0,2.890476,4.224524,0.87075<br/> C,0,2.531923,5.202687,1.796203<br/> P,0,-2.961706,0.943266,-0.373385<br/> P,0,2.367633,2.341973,-1.188201<br/> C,0,-0.245527,1.566041,-0.729859<br/> C,0,-2.09013,3.54997,-0.505468<br/> C,0,-1.245672,0.592223,-0.65829<br/> C,0,5.099853,2.308943,-0.900511<br/> H,0,4.99962,3.369813,-1.123948<br/> C,0,3.951581,1.505641,-0.786592<br/> C,0,1.089201,1.106092,-0.846237<br/> C,0,-2.341383,4.913586,-0.724528<br/> H,0,-1.501368,5.602078,-0.759882<br/> C,0,4.075557,0.108688,-0.614694<br/> C,0,-3.231599,2.703124,-0.511564<br/> C,0,-4.5286,3.184781,-0.699803<br/> H,0,-5.370947,2.497813,-0.719574<br/> C,0,-3.631189,5.406867,-0.923745<br/> B,0,-0.593918,3.036645,-0.357619<br/> C,0,6.372139,1.76458,-0.775588<br/> H,0,7.246935,2.403814,-0.854613<br/> C,0,6.512478,0.389823,-0.586543<br/> C,0,5.377718,-0.411547,-0.522454<br/> H,0,5.493839,-1.487459,-0.401454<br/> C,0,-4.727749,4.548814,-0.901011<br/> H,0,-5.730844,4.93243,-1.058211<br/> B,0,2.848978,-0.916609,-0.506247</p> |

|  |                                   |
|--|-----------------------------------|
|  | C,0,1.388446,-0.257227,-0.753223  |
|  | C,0,-2.7842,-5.632731,-0.717834   |
|  | C,0,-0.638524,-3.903927,-0.500392 |
|  | C,0,-1.939176,-3.34213,-0.52404   |
|  | C,0,-2.995314,-4.258575,-0.635835 |
|  | H,0,-4.011615,-3.87182,-0.668994  |
|  | C,0,-0.409772,-5.285041,-0.590336 |
|  | H,0,0.60693,-5.671404,-0.603623   |
|  | C,0,-1.489281,-6.152776,-0.693712 |
|  | H,0,-1.321855,-7.222549,-0.769155 |
|  | P,0,0.793435,-2.832438,-0.421326  |
|  | C,0,-1.032708,-0.785909,-0.648391 |
|  | C,0,-2.966925,-1.308308,1.020351  |
|  | C,0,1.60038,-3.480454,2.231947    |
|  | H,0,0.82659,-4.243275,2.28269     |
|  | C,0,1.783231,-2.722972,1.079014   |
|  | C,0,0.303989,-1.140846,-0.677643  |
|  | C,0,-3.191969,-2.113303,2.138412  |
|  | H,0,-2.906352,-3.162727,2.104171  |
|  | C,0,2.760132,-1.714601,0.937854   |
|  | C,0,-3.359422,0.04301,1.139111    |
|  | C,0,-3.956891,0.581856,2.274001   |
|  | H,0,-4.242042,1.630664,2.31299    |
|  | C,0,-3.783457,-1.596342,3.295493  |
|  | B,0,-2.290494,-1.769414,-0.406833 |
|  | C,0,2.429167,-3.223874,3.323722   |
|  | H,0,2.313194,-3.794689,4.240078   |
|  | C,0,3.399614,-2.226354,3.232536   |
|  | C,0,3.561031,-1.483168,2.059458   |
|  | H,0,4.325604,-0.710929,2.015071   |
|  | C,0,-4.168249,-0.25833,3.367581   |
|  | H,0,-4.626398,0.132417,4.270887   |
|  | C,0,0.217203,4.872349,1.250867    |
|  | H,0,-0.827955,5.112035,1.430449   |
|  | H,0,3.938619,3.965841,0.754921    |
|  | H,0,3.304969,5.697248,2.378132    |
|  | O,0,-4.645036,0.211249,-2.39555   |
|  | C,0,-3.809228,-0.201931,-1.634408 |
|  | O,0,-3.360298,-1.411194,-1.493519 |
|  | O,0,3.025083,-2.052481,-1.581776  |
|  | C,0,2.186948,-3.033722,-1.700962  |
|  | O,0,2.219256,-3.971821,-2.455535  |
|  | H,0,7.501106,-0.054443,-0.510509  |
|  | H,0,0.910729,6.287859,2.717956    |
|  | H,0,-3.778347,6.468033,-1.102184  |
|  | H,0,-3.947501,-2.24645,4.150479   |
|  | H,0,-3.633687,-6.304018,-0.808808 |
|  | H,0,4.039839,-2.024018,4.087019   |

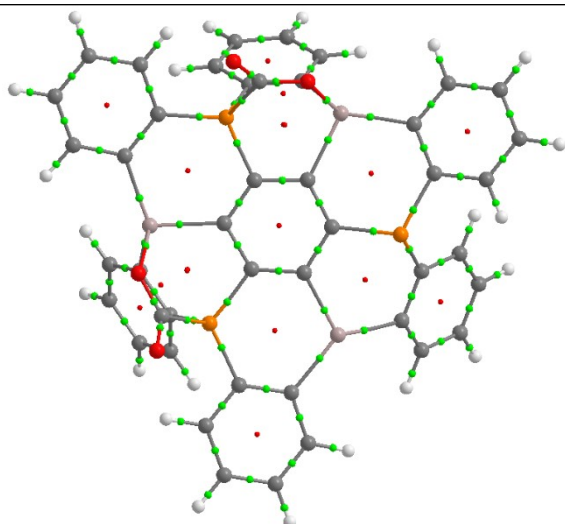

**2CO<sub>2</sub>-Al<sub>3</sub>P<sub>3</sub>-NG**

**E= -3743,38919431H; FreqIm=0**

C,1.9616661895,5.6673868619,2.1571059093  
 C,2.2140411847,3.5978466568,0.2594578165  
 C,0.9765682091,4.2876485278,0.3972754353  
 C,3.2864422828,3.9478315295,1.0843235908  
 C,3.1598508571,4.9740422831,2.0234518  
 P,-2.9943699494,1.0241761839,-0.4856597251  
 P,2.3999035061,2.3805236118,-1.1518455992  
 C,-0.2121591282,1.5653891897,-0.7127834868  
 C,-2.48910543,3.8242467075,-0.5144872821  
 C,-1.2242940163,0.6103717569,-0.5792579253  
 C,5.0798195747,2.6911418118,-1.2687070373  
 H,4.7578940778,3.6969880777,-1.536338629  
 C,4.1187297605,1.7076561352,-0.9694574995  
 C,1.1250820601,1.0954934698,-0.7428286443  
 C,-2.9937226312,5.1330639587,-0.5830623736  
 H,-2.3104152542,5.9752817419,-0.4893793178  
 C,4.5336982017,0.381656969,-0.6896985555  
 C,-3.4317022895,2.7736679555,-0.6482205624  
 C,-4.7943056963,3.0283906271,-0.8500208695  
 H,-5.4966393063,2.2076325941,-0.9677713083  
 C,-4.3493044112,5.396156016,-0.7780308285  
 Al,-0.5723351245,3.4354836037,-0.3915047625  
 C,6.4404775773,2.409629456,-1.2281784953  
 H,7.1611544999,3.1914969533,-1.4511875495  
 C,6.8676308951,1.1190516991,-0.9208173189  
 C,5.9191648669,0.1312153931,-0.6726505105  
 H,6.2714159317,-0.8789394307,-0.4659269604  
 C,-5.2495041578,4.342606595,-0.9159128734  
 H,-6.3046400642,4.5384048318,-1.0797377214  
 Al,3.2251800158,-1.0525970385,-0.4441100625  
 C,1.4238561829,-0.2662595721,-0.6315231203  
 C,-2.3284652583,-6.2436092471,-0.555036529  
 C,-0.5242667694,-4.1305439323,-0.4724762668  
 C,-1.908428142,-3.8283602914,-0.4153089193  
 C,-2.7811863598,-4.9288216752,-0.4580827013  
 H,-3.8555370265,-4.7558633681,-0.4227998573  
 C,-0.0578253003,-5.4501273126,-0.5777562304  
 H,1.0077459495,-5.6546631267,-0.6444212236  
 C,-0.9619596336,-6.505828919,-0.6166118428  
 H,-0.5977778414,-7.5247682357,-0.7041245328  
 P,0.8077738324,-2.9025692986,-0.3996151126  
 C,-1.0114541957,-0.7796955358,-0.5096179608  
 C,-3.53808334,-1.0932408051,1.2003826122  
 C,1.4554534643,-3.9298387675,2.134071032  
 H,0.557881319,-4.5389648988,2.0566018555  
 C,1.8254178069,-3.0610464859,1.1050214438  
 C,0.3285536019,-1.1493875596,-0.5357672882  
 C,-4.0475634118,-1.6302795079,2.3890286298  
 H,-3.9748772332,-2.7020523903,2.5644516882  
 C,2.9784680427,-2.2422094598,1.1542424669  
 C,-3.6662002366,0.308982007,1.0534060938  
 C,-4.2634446335,1.1273273852,2.0152413133  
 H,-4.3424979586,2.201688621,1.8666465709  
 C,-4.6512732376,-0.8322597516,3.3642000369



|                                                                                    |                                                                                                                                                                                                                                                                                                                                                                                                                                                                                                                                                                                                                                                                                                                                                                                                                                                                                                                                                                                                                                                                                                                                                                                                                                                                                                                                                                                                                                                                                                                                                                                                           |
|------------------------------------------------------------------------------------|-----------------------------------------------------------------------------------------------------------------------------------------------------------------------------------------------------------------------------------------------------------------------------------------------------------------------------------------------------------------------------------------------------------------------------------------------------------------------------------------------------------------------------------------------------------------------------------------------------------------------------------------------------------------------------------------------------------------------------------------------------------------------------------------------------------------------------------------------------------------------------------------------------------------------------------------------------------------------------------------------------------------------------------------------------------------------------------------------------------------------------------------------------------------------------------------------------------------------------------------------------------------------------------------------------------------------------------------------------------------------------------------------------------------------------------------------------------------------------------------------------------------------------------------------------------------------------------------------------------|
|                                                                                    | <p>Al,-2.5701784671,-1.9728732104,-0.3146305366<br/> C,2.2577886378,-4.0027967079,3.2716152452<br/> H,1.9868920596,-4.6726568208,4.0823504263<br/> C,3.4019930309,-3.2126876989,3.3615756222<br/> C,3.7479814207,-2.3477277449,2.3200644212<br/> H,4.6447987642,-1.7393708955,2.4235627591<br/> C,-4.7589904775,0.5444767299,3.1804982619<br/> H,-5.2250875906,1.1656935388,3.9394005547<br/> C,0.8775858822,5.3063208891,1.3567428996<br/> H,-0.066078179,5.8346990982,1.4883023903<br/> H,4.2310231932,3.4176430299,1.0092047514<br/> H,4.0073002142,5.2240020726,2.656151495<br/> O,-4.5282243291,0.514481157,-2.666698003<br/> C,-3.8482280411,-0.043685988,-1.8443459076<br/> O,-3.6057979563,-1.3020401706,-1.7006393171<br/> O,3.0810634729,-2.3740773794,-1.7462381536<br/> C,2.0954175877,-3.2018939265,-1.8029938796<br/> O,1.9023424066,-4.1084549911,-2.572619157<br/> H,7.9278090213,0.8825101018,-0.8954480599<br/> H,1.8672811358,6.4705326602,2.8821965668<br/> H,-4.7016354498,6.4224039789,-0.8289563917<br/> H,-5.0387728835,-1.2865985547,4.2721462268<br/> H,-3.0414391355,-7.0627609527,-0.5893510847<br/> H,4.0275568296,-3.2698188155,4.2485380587</p>                                                                                                                                                                                                                                                                                                                                                                                                                            |
| 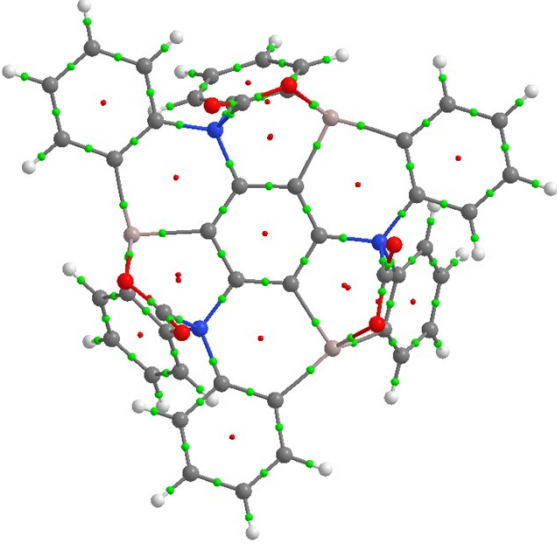 | <p><b>3CO<sub>2</sub>-Al<sub>3</sub>N<sub>3</sub>-NG</b><br/> <b>E= -3072,0995948H; FreqIm=0</b><br/> C,-3.0008497043,-3.4787127001,3.3105373501<br/> C,-2.7392470215,-2.061293964,0.9328050839<br/> C,-1.9315462981,-3.1968242658,1.1271992912<br/> C,-3.6171383841,-1.6046334742,1.9172214677<br/> C,-3.7439615257,-2.3209317104,3.1056811822<br/> N,2.3661016688,-1.6439238445,-0.3458189661<br/> N,-2.6066511825,-1.2270531615,-0.3459619323<br/> C,-0.1587732141,-1.4056561826,-0.3136133347<br/> C,1.2384675477,-4.00674769,-0.5161211785<br/> C,1.0776461513,-0.8174426999,-0.3152427296<br/> C,-4.9706686914,-1.3325389438,-0.7732416181<br/> H,-4.7998395266,-2.4065291833,-0.7950949312<br/> C,-3.894914471,-0.4606553555,-0.5613443188<br/> C,-1.2468148711,-0.5243283865,-0.3154207277<br/> C,1.5125783654,-5.3807719004,-0.6912730989<br/> H,0.6823593242,-6.0838880155,-0.6652389607<br/> C,-4.0892156011,0.9307804367,-0.5170382804<br/> C,2.3464127039,-3.1428508313,-0.5610286825<br/> C,3.6392140427,-3.6387676896,-0.7733487038<br/> H,4.4840694499,-2.9540559238,-0.7955472073<br/> C,2.7891730188,-5.8819998548,-0.8986888536<br/> Al,-0.5612759907,-3.2850546537,-0.2735705491<br/> C,-6.2571398505,-0.8501850882,-0.9416080563<br/> H,-7.073316039,-1.5464118638,-1.1077633287<br/> C,-6.4886586809,0.5249470568,-0.8988895217<br/> C,-5.4163411527,1.3801473059,-0.6920569195<br/> H,-5.6103765398,2.4506678665,-0.6664290749<br/> C,3.8644317555,-4.9940899772,-0.9418242987<br/> H,4.8753442737,-5.3529498523,-1.1084056661<br/> Al,-2.5644639486,2.1286422036,-0.274439341</p> |

|  |                                                                                                                                                                                                                                                                                                                                                                                                                                                                                                                                                                                                                                                                                                                                                                                                                                                                                                                                                                                                                                                                                                                                                                                                                                                                                                                                                                                                                                                                                                                                                                                                                                                                                                                                                                                                                                                                                                                                                                                                                                                                                                                                                                                                                                                                                                                                                                                                                                                                                                |
|--|------------------------------------------------------------------------------------------------------------------------------------------------------------------------------------------------------------------------------------------------------------------------------------------------------------------------------------------------------------------------------------------------------------------------------------------------------------------------------------------------------------------------------------------------------------------------------------------------------------------------------------------------------------------------------------------------------------------------------------------------------------------------------------------------------------------------------------------------------------------------------------------------------------------------------------------------------------------------------------------------------------------------------------------------------------------------------------------------------------------------------------------------------------------------------------------------------------------------------------------------------------------------------------------------------------------------------------------------------------------------------------------------------------------------------------------------------------------------------------------------------------------------------------------------------------------------------------------------------------------------------------------------------------------------------------------------------------------------------------------------------------------------------------------------------------------------------------------------------------------------------------------------------------------------------------------------------------------------------------------------------------------------------------------------------------------------------------------------------------------------------------------------------------------------------------------------------------------------------------------------------------------------------------------------------------------------------------------------------------------------------------------------------------------------------------------------------------------------------------------------|
|  | <p> C,-1.1379934594,0.8405577224,-0.3138056656<br/> C,3.6995882952,5.3567525882,-0.8977993539<br/> C,1.5487601252,3.6036587263,-0.5603550815<br/> C,2.8508644115,3.076044957,-0.5159033645<br/> C,3.9037630054,4.0004959841,-0.6909087805<br/> H,4.927788151,3.6330602459,-0.6651778201<br/> C,1.3318998072,4.9713363195,-0.7720447478<br/> H,0.3165257631,5.3607405007,-0.7939196349<br/> C,2.3930528869,5.8440813817,-0.9403945329<br/> H,2.198408631,6.8990482704,-1.1066342009<br/> N,0.240722341,2.871294178,-0.3454743885<br/> C,1.2968767056,0.565492088,-0.3134757571<br/> C,3.7346982206,-0.0742489793,1.1270966523<br/> C,0.4177247569,3.935032711,1.9179645191<br/> H,1.4910228218,3.9938235074,1.781036001<br/> C,-0.416078278,3.4031122631,0.9330223229<br/> C,0.1692461816,1.3422281447,-0.3152551281<br/> C,4.4212885405,0.1272919964,2.3308746121<br/> H,4.8856843529,1.0934136658,2.5167177634<br/> C,-1.8034369906,3.2710859246,1.1266400342<br/> C,3.1551352557,-1.3415223057,0.9328298052<br/> C,3.1989964401,-2.3302937738,1.9171010915<br/> H,2.7134725682,-3.2892083727,1.7796963068<br/> C,4.5138164398,-0.8594213393,3.3103076391<br/> Al,3.1257516796,1.1565598203,-0.2736947257<br/> C,-0.1399762148,4.4024816363,3.1063379451<br/> H,0.5127916947,4.8164139435,3.8689223391<br/> C,-1.5142773932,4.337319057,3.3104746263<br/> C,-2.3219482599,3.7641743138,2.3303850446<br/> H,-3.3908981901,3.6829097081,2.5156818562<br/> C,3.8828593144,-2.0819585905,3.1054871427<br/> H,3.9151483694,-2.8547988346,3.8674995016<br/> C,-2.1001722609,-3.89206895,2.3310651526<br/> H,-1.4955264081,-4.7771835748,2.5169747102<br/> H,-4.2045729117,-0.7045209697,1.7799535963<br/> H,-4.4292436247,-1.9622685483,3.8677310274<br/> O,2.8188366296,-1.7440774734,-2.7417800362<br/> C,3.0646673818,-1.0492676723,-1.8156732033<br/> O,3.6837118805,0.0364148976,-1.6565321231<br/> O,-1.8732340712,3.172213012,-1.6569940597<br/> C,-0.6234889318,3.1792465167,-1.8158263271<br/> O,0.101522427,3.3147588943,-2.7414541168<br/> O,-1.8102199816,-3.2086541602,-1.6564184557<br/> C,-2.4408812641,-2.1296935791,-1.8157056401<br/> O,-2.9197903944,-1.5694633239,-2.7417817654<br/> H,4.5430979879,6.0281534621,-1.0283929745<br/> H,5.0546082554,-0.6694765214,4.233073987<br/> H,2.9488410638,-6.9481946745,-1.0293878592<br/> H,-3.1067581178,-4.0419053414,4.2333761347<br/> H,-7.491944543,0.9196000863,-1.0293957941<br/> H,-1.9496536983,4.7100338053,4.2332776308 </p> |
|--|------------------------------------------------------------------------------------------------------------------------------------------------------------------------------------------------------------------------------------------------------------------------------------------------------------------------------------------------------------------------------------------------------------------------------------------------------------------------------------------------------------------------------------------------------------------------------------------------------------------------------------------------------------------------------------------------------------------------------------------------------------------------------------------------------------------------------------------------------------------------------------------------------------------------------------------------------------------------------------------------------------------------------------------------------------------------------------------------------------------------------------------------------------------------------------------------------------------------------------------------------------------------------------------------------------------------------------------------------------------------------------------------------------------------------------------------------------------------------------------------------------------------------------------------------------------------------------------------------------------------------------------------------------------------------------------------------------------------------------------------------------------------------------------------------------------------------------------------------------------------------------------------------------------------------------------------------------------------------------------------------------------------------------------------------------------------------------------------------------------------------------------------------------------------------------------------------------------------------------------------------------------------------------------------------------------------------------------------------------------------------------------------------------------------------------------------------------------------------------------------|

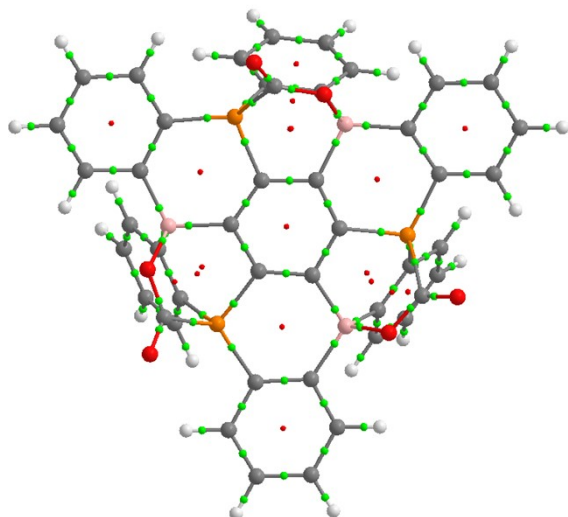

**3CO<sub>2</sub>-B<sub>3</sub>P<sub>3</sub>-NG**

**E= -3279,26561813H; FreqIm=0**

C,0,-1.751543,-3.910996,3.1883  
 C,0,-2.487098,-2.367639,1.038563  
 C,0,-1.288725,-3.111991,0.934477  
 C,0,-3.309782,-2.384226,2.15989  
 C,0,-2.930096,-3.170138,3.248972  
 P,0,2.591205,-1.710993,-0.455465  
 P,0,-2.777402,-1.388446,-0.455909  
 C,0,-0.147677,-1.415181,-0.663882  
 C,0,0.883337,-3.911299,-0.586552  
 C,0,1.089578,-0.80462,-0.674677  
 C,0,-5.423462,-0.704761,-0.642301  
 H,0,-5.596236,-1.778871,-0.642392  
 C,0,-4.117413,-0.20072,-0.551484  
 C,0,-1.241546,-0.541152,-0.674959  
 C,0,0.711752,-5.29765,-0.715081  
 H,0,-0.303538,-5.686097,-0.758625  
 C,0,-3.828754,1.190936,-0.587366  
 C,0,2.232764,-3.465185,-0.551281  
 C,0,3.322487,-4.343875,-0.643172  
 H,0,4.338954,-3.956091,-0.643973  
 C,0,1.784668,-6.181888,-0.801353  
 B,0,-0.444344,-2.984728,-0.471691  
 C,0,-6.492607,0.173448,-0.76223  
 H,0,-7.505391,-0.209255,-0.838848  
 C,0,-6.24585,1.546156,-0.800956  
 C,0,-4.943461,2.032883,-0.715664  
 H,0,-4.772029,3.106327,-0.759534  
 C,0,3.09675,-5.708943,-0.763432  
 H,0,3.934745,-6.394367,-0.840991  
 B,0,-2.362561,1.877358,-0.472534  
 C,0,-1.151627,0.835646,-0.664354  
 C,0,4.461671,4.636441,-0.800349  
 C,0,1.884831,3.666232,-0.551115  
 C,0,2.94585,2.720557,-0.586598  
 C,0,4.232257,3.265138,-0.71461  
 H,0,5.07638,2.580166,-0.757946  
 C,0,2.101004,5.049324,-0.642582  
 H,0,1.256911,5.735687,-0.643239  
 C,0,3.396073,5.53632,-0.762474  
 H,0,3.570848,6.604768,-0.839579  
 P,0,0.186367,3.099596,-0.455506  
 C,0,1.299636,0.57969,-0.663914  
 C,0,3.339644,0.440141,0.934428  
 C,0,-0.410201,4.056801,2.160935  
 H,0,0.559501,4.548411,2.193545  
 C,0,-0.806974,3.3371,1.038903  
 C,0,0.152261,1.345944,-0.674949  
 C,0,3.832646,1.123955,2.046805  
 H,0,3.888321,2.210517,2.021298  
 C,0,-2.050977,2.671895,0.933881  
 C,0,3.293752,-0.969799,1.038973  
 C,0,3.71878,-1.673769,2.160656  
 H,0,3.65965,-2.759391,2.192852  
 C,0,4.262584,0.439239,3.188364

|                                                                                     |                                                                                                                                                                                                                                                                                                                                                                                                                                                                                                                                                                                                                                                                                                                                                                                                                                                                                                                                                                                                                                                                                      |
|-------------------------------------------------------------------------------------|--------------------------------------------------------------------------------------------------------------------------------------------------------------------------------------------------------------------------------------------------------------------------------------------------------------------------------------------------------------------------------------------------------------------------------------------------------------------------------------------------------------------------------------------------------------------------------------------------------------------------------------------------------------------------------------------------------------------------------------------------------------------------------------------------------------------------------------------------------------------------------------------------------------------------------------------------------------------------------------------------------------------------------------------------------------------------------------|
|                                                                                     | <p>B,0,2.807264,1.107486,-0.471872<br/> C,0,-1.281115,4.120374,3.249686<br/> H,0,-0.995819,4.671162,4.140739<br/> C,0,-2.512253,3.470749,3.187979<br/> C,0,-2.889934,2.756493,2.046065<br/> H,0,-3.8587,2.261362,2.020195<br/> C,0,4.209583,-0.951826,3.249539<br/> H,0,4.54415,-1.474663,4.140298<br/> C,0,-0.94326,-3.880799,2.046991<br/> H,0,-0.03005,-4.472202,2.021805<br/> H,0,-4.220703,-1.790698,2.191674<br/> H,0,-3.550529,-3.198772,4.139468<br/> O,0,4.370656,-1.492325,-2.529973<br/> C,0,3.719312,-0.863814,-1.738356<br/> O,0,3.663202,0.429746,-1.586684<br/> O,0,-2.203583,2.957656,-1.587053<br/> C,0,-1.111373,3.653066,-1.738521<br/> O,0,-0.892926,4.531899,-2.529645<br/> O,0,-1.459083,-3.387309,-1.586576<br/> C,0,-2.607319,-2.789119,-1.738785<br/> O,0,-3.47689,-3.039073,-2.530802<br/> H,0,5.477693,5.007002,-0.90456<br/> H,0,4.643714,0.998701,4.038273<br/> H,0,1.59766,-7.247036,-0.90604<br/> H,0,-1.457675,-4.520691,4.038326<br/> H,0,-7.074707,2.240811,-0.905415<br/> H,0,-3.187545,3.520706,4.037745</p>                                     |
| 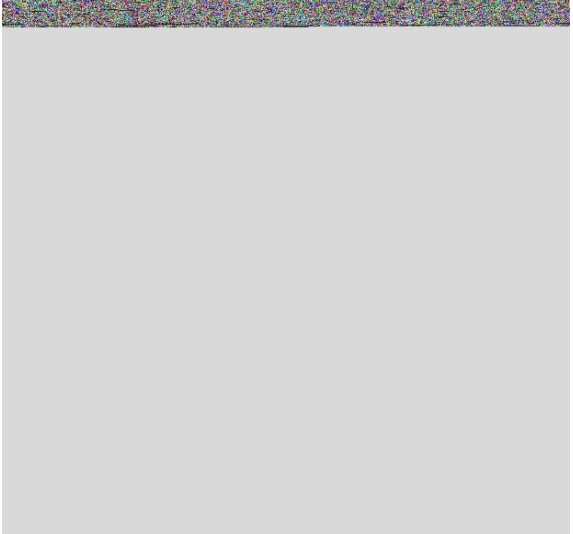 | <p><b>3CO<sub>2</sub>-Al<sub>3</sub>P<sub>3</sub>-NG</b><br/> <b>E= -3932,03045367H; FreqIm=0</b><br/> C,1.817229,4.714914,3.25815<br/> C,2.223534,3.10027,1.055707<br/> C,0.98769,3.788079,1.149625<br/> C,3.228456,3.20372,2.019486<br/> C,3.018022,4.021457,3.129003<br/> P,-2.976746,1.102693,-0.407477<br/> P,2.443359,2.026837,-0.406728<br/> C,-0.193508,1.420055,-0.397551<br/> C,-2.199324,3.863605,-0.511105<br/> C,-1.257472,0.526104,-0.40095<br/> C,5.098874,2.344424,-0.731846<br/> H,4.8186,3.39354,-0.790528<br/> C,4.119038,1.354291,-0.558764<br/> C,1.08436,0.826246,-0.401082<br/> C,-2.615178,5.200634,-0.63033<br/> H,-1.867819,5.991973,-0.606157<br/> C,4.445735,-0.026668,-0.513493<br/> C,-3.231869,2.890225,-0.558556<br/> C,-4.579253,3.243857,-0.731413<br/> H,-5.347652,2.476628,-0.79129<br/> C,-3.951464,5.563833,-0.791816<br/> Al,-0.283754,3.389382,-0.345008<br/> C,6.437267,1.986052,-0.847878<br/> H,7.191709,2.753982,-0.987554<br/> C,6.794093,0.640937,-0.795696<br/> C,5.811537,-0.334829,-0.634179<br/> H,6.123204,-1.377727,-0.61128</p> |

|  |                                                                                                                                                                                                                                                                                                                                                                                                                                                                                                                                                                                                                                                                                                                                                                                                                                                                                                                                                                                                                                                                                                                                                                                                                                                                                                                                                                                                                                                                                                                                                                                                                                                                                                                                                                                                                                                                      |
|--|----------------------------------------------------------------------------------------------------------------------------------------------------------------------------------------------------------------------------------------------------------------------------------------------------------------------------------------------------------------------------------------------------------------------------------------------------------------------------------------------------------------------------------------------------------------------------------------------------------------------------------------------------------------------------------------------------------------------------------------------------------------------------------------------------------------------------------------------------------------------------------------------------------------------------------------------------------------------------------------------------------------------------------------------------------------------------------------------------------------------------------------------------------------------------------------------------------------------------------------------------------------------------------------------------------------------------------------------------------------------------------------------------------------------------------------------------------------------------------------------------------------------------------------------------------------------------------------------------------------------------------------------------------------------------------------------------------------------------------------------------------------------------------------------------------------------------------------------------------------------|
|  | C,-4.938023,4.582338,-0.845542<br>H,-5.980269,4.851914,-0.98518<br>Al,3.077427,-1.448642,-0.347325<br>C,1.326725,-0.542037,-0.398232<br>C,-2.842285,-6.204083,-0.791962<br>C,-0.886624,-4.243968,-0.557339<br>C,-2.24585,-3.836369,-0.512441<br>C,-3.195744,-4.865,-0.632414<br>H,-4.254714,-4.613236,-0.609938<br>C,-0.519291,-5.587966,-0.72825<br>H,0.529383,-5.869924,-0.786379<br>C,-1.499062,-6.567937,-0.842947<br>H,-1.211393,-7.605545,-0.980931<br>P,0.533799,-3.129025,-0.406537<br>C,-1.132809,-0.877507,-0.398011<br>C,-3.776642,-1.039292,1.145898<br>C,1.161979,-4.396431,2.019784<br>H,0.219484,-4.928886,1.916263<br>C,1.57423,-3.475071,1.055195<br>C,0.173426,-1.351743,-0.401042<br>C,-4.393146,-1.585451,2.278235<br>H,-4.406258,-2.665975,2.410016<br>C,2.788429,-2.749536,1.147158<br>C,-3.798121,0.374973,1.053535<br>C,-4.3918,1.192533,2.017105<br>H,-4.381934,2.274951,1.913421<br>C,-4.998929,-0.786679,3.251785<br>Al,-2.793128,-1.940302,-0.347576<br>C,1.977055,-4.623689,3.128041<br>H,1.67015,-5.336959,3.887128<br>C,3.178969,-3.931714,3.255044<br>C,3.569076,-3.009437,2.280214<br>H,4.511547,-2.480805,2.411935<br>C,-4.997849,0.600206,3.124363<br>H,-5.463995,1.222497,3.882391<br>C,0.82279,4.592264,2.284<br>H,-0.106741,5.142852,2.417529<br>H,4.161017,2.654427,1.914567<br>H,3.789825,4.112086,3.887457<br>O,-4.436153,0.779602,-2.67605<br>C,-3.829137,0.150284,-1.849412<br>O,-3.670716,-1.130688,-1.757749<br>O,2.81531,-2.614534,-1.756565<br>C,1.785474,-3.392662,-1.847599<br>O,1.544647,-4.234327,-2.673084<br>O,0.856345,3.746229,-1.754513<br>C,2.04492,3.243208,-1.847035<br>O,2.893482,3.45579,-2.673198<br>H,-3.614881,-6.962309,-0.884955<br>H,-5.472462,-1.24891,4.1138<br>H,-4.221909,6.612069,-0.884314<br>H,1.653184,5.353245,4.122209<br>H,7.837011,0.351145,-0.889633<br>H,3.815195,-4.10952,4.117965 |
|--|----------------------------------------------------------------------------------------------------------------------------------------------------------------------------------------------------------------------------------------------------------------------------------------------------------------------------------------------------------------------------------------------------------------------------------------------------------------------------------------------------------------------------------------------------------------------------------------------------------------------------------------------------------------------------------------------------------------------------------------------------------------------------------------------------------------------------------------------------------------------------------------------------------------------------------------------------------------------------------------------------------------------------------------------------------------------------------------------------------------------------------------------------------------------------------------------------------------------------------------------------------------------------------------------------------------------------------------------------------------------------------------------------------------------------------------------------------------------------------------------------------------------------------------------------------------------------------------------------------------------------------------------------------------------------------------------------------------------------------------------------------------------------------------------------------------------------------------------------------------------|

**Table S5:** Geometries, energies (in Hartree) and Cartesian coordinates (in Å) of the monomers with a Na<sup>+</sup> cation in vacuum. Level of theory: M06-2X/6-311++G\*//M06-2X/6-31+G\*

|  |                                                                                                                                                                                                                                                                                                                                                                                                                                                                                                                                                                                                                                                                                                                                                                                                                                                                                                                                                                                                                                                                                                                                                                                                                                                                                                                                                                                                                                                                                                                                                                                                                                                                                                                                                                                                                                                                                                                                                                                                                                                                                                                                                                                                                                                                                                                                                                                                                                                                                                                                                                                                        |
|--|--------------------------------------------------------------------------------------------------------------------------------------------------------------------------------------------------------------------------------------------------------------------------------------------------------------------------------------------------------------------------------------------------------------------------------------------------------------------------------------------------------------------------------------------------------------------------------------------------------------------------------------------------------------------------------------------------------------------------------------------------------------------------------------------------------------------------------------------------------------------------------------------------------------------------------------------------------------------------------------------------------------------------------------------------------------------------------------------------------------------------------------------------------------------------------------------------------------------------------------------------------------------------------------------------------------------------------------------------------------------------------------------------------------------------------------------------------------------------------------------------------------------------------------------------------------------------------------------------------------------------------------------------------------------------------------------------------------------------------------------------------------------------------------------------------------------------------------------------------------------------------------------------------------------------------------------------------------------------------------------------------------------------------------------------------------------------------------------------------------------------------------------------------------------------------------------------------------------------------------------------------------------------------------------------------------------------------------------------------------------------------------------------------------------------------------------------------------------------------------------------------------------------------------------------------------------------------------------------------|
|  | <p><b>B<sub>3</sub>N<sub>3</sub>-NG-Na down</b><br/> <b>E=-2015,8763026H; FreqIm=0</b></p> <p>C,3.1964520981,-5.0122620729,1.4652648873<br/> C,1.0563091798,-3.5345115334,0.4087354026<br/> C,2.3625948499,-2.9967575471,0.3626171233<br/> C,0.8270978721,-4.7764827284,1.0243825121<br/> C,1.8891756855,-5.5048340954,1.5381515349<br/> C,1.2263713355,-0.7418178439,-0.0695513405<br/> C,3.7523048323,-0.7157233119,-0.5079103609<br/> C,1.233341248,0.6787999617,-0.089844603<br/> C,-1.0423065876,-4.7203823896,-1.2185485541<br/> H,-0.0500780799,-5.1407774421,-1.3394576142<br/> C,-1.2145986427,-3.4806831593,-0.5839746764<br/> C,-0.0289318244,-1.4073464302,-0.0895169952<br/> C,4.9221674872,-1.2995583117,-1.0349523292<br/> H,5.017268742,-2.3817446644,-1.0174761968<br/> C,-2.4958312423,-2.8915033196,-0.5086963206<br/> C,3.6218836503,0.6883833104,-0.5842622241<br/> C,4.609785945,1.4570060173,-1.21871335<br/> H,4.4779206438,2.526408079,-1.3404309106<br/> C,5.9196225555,-0.5393115021,-1.6211187286<br/> B,2.521752492,-1.5288430049,-0.0744587613<br/> C,-2.140170477,-5.3988277243,-1.7246266123<br/> H,-1.9882509669,-6.3499871075,-2.2257758453<br/> C,-3.4256222166,-4.8562100914,-1.6235907839<br/> C,-3.5858097332,-3.6124330424,-1.0372920029<br/> H,-4.570427043,-3.1534047476,-1.0211424745<br/> C,5.7467381431,0.845118029,-1.7234568633<br/> H,6.4948197954,1.4519362264,-2.2245151119<br/> B,-2.5849701867,-1.4194608221,-0.0745625653<br/> C,-1.2557624123,-0.6910373398,-0.0692587182<br/> C,-2.4937099631,5.3954074796,-1.6212496026<br/> C,-2.4073414836,2.792511545,-0.5824209368<br/> C,-1.2564791445,3.6075146472,-0.5075620316<br/> C,-1.3361580178,4.9120744757,-1.0357288594<br/> H,-0.4463566666,5.5353314498,-1.0197831747<br/> C,-3.5675100874,3.2633800082,-1.2160676121<br/> H,-4.4278486685,2.6144395187,-1.3366151601<br/> C,-3.606466874,4.5535132603,-1.7217011043<br/> H,-4.5065251778,4.8976836304,-2.220855984<br/> C,0.0293169113,1.4331404853,-0.069306993<br/> C,1.4141495108,3.544653965,0.3620471809<br/> C,-4.550653376,1.6714241136,1.0250606552<br/> H,-4.3831842686,2.7387722486,1.1167673064<br/> C,-3.5892314085,0.8522819387,0.40961906<br/> C,-1.2044435158,0.7288200956,-0.0889808843<br/> C,1.5566688752,4.8412042282,0.8965971461<br/> H,0.6938781178,5.5017705829,0.8936430009<br/> C,-3.7768116084,-0.5478191216,0.3623861437<br/> C,2.5330686194,2.6823111593,0.4077660581<br/> C,3.7236474452,3.1050159146,1.0224214385<br/> H,4.564483456,2.4263983879,1.1129592071<br/> C,2.743286582,5.2749233026,1.4633330686</p> |
|--|--------------------------------------------------------------------------------------------------------------------------------------------------------------------------------------------------------------------------------------------------------------------------------------------------------------------------------------------------------------------------------------------------------------------------------------------------------------------------------------------------------------------------------------------------------------------------------------------------------------------------------------------------------------------------------------------------------------------------------------------------------------------------------------------------------------------------------------------------------------------------------------------------------------------------------------------------------------------------------------------------------------------------------------------------------------------------------------------------------------------------------------------------------------------------------------------------------------------------------------------------------------------------------------------------------------------------------------------------------------------------------------------------------------------------------------------------------------------------------------------------------------------------------------------------------------------------------------------------------------------------------------------------------------------------------------------------------------------------------------------------------------------------------------------------------------------------------------------------------------------------------------------------------------------------------------------------------------------------------------------------------------------------------------------------------------------------------------------------------------------------------------------------------------------------------------------------------------------------------------------------------------------------------------------------------------------------------------------------------------------------------------------------------------------------------------------------------------------------------------------------------------------------------------------------------------------------------------------------------|

|                                                                                    |                                                                                                                                                                                                                                                                                                                                                                                                                                                                                                                                                                                                                                                                                                                                                                                                                                                                                                                                                                                                                                                                                                                                                                                                                                                                                                                                                                                                                                                                                                                                                                                                                                                    |
|------------------------------------------------------------------------------------|----------------------------------------------------------------------------------------------------------------------------------------------------------------------------------------------------------------------------------------------------------------------------------------------------------------------------------------------------------------------------------------------------------------------------------------------------------------------------------------------------------------------------------------------------------------------------------------------------------------------------------------------------------------------------------------------------------------------------------------------------------------------------------------------------------------------------------------------------------------------------------------------------------------------------------------------------------------------------------------------------------------------------------------------------------------------------------------------------------------------------------------------------------------------------------------------------------------------------------------------------------------------------------------------------------------------------------------------------------------------------------------------------------------------------------------------------------------------------------------------------------------------------------------------------------------------------------------------------------------------------------------------------|
|                                                                                    | <p>B,0.0631733669,2.9484817886,-0.074418341<br/> C,-5.713050363,1.1155883797,1.5373953537<br/> H,-6.4413558249,1.763106513,2.0163180508<br/> C,-5.9402611969,-0.2627201112,1.4631969022<br/> C,-4.9712068917,-1.0730406831,0.8959956513<br/> H,-5.1120777041,-2.1504824853,0.8916856078<br/> C,3.8236159575,4.3891368352,1.5357904326<br/> H,4.7488731275,4.695758962,2.0143079058<br/> C,3.4141203866,-3.7681058506,0.897807611<br/> H,4.4175043193,-3.3510114342,0.8946426938<br/> H,-0.1809994871,-5.1650373522,1.1159376614<br/> H,1.6921333096,-6.4590116411,2.0175336795<br/> H,-2.5286611053,6.4002568471,-2.0293774985<br/> H,-6.8504037128,-0.6910544737,1.870412121<br/> H,2.8275126421,6.2768840688,1.8715131003<br/> H,4.0220356457,-5.5859895536,1.873759171<br/> H,6.8076200725,-1.0118360847,-2.0282360647<br/> H,-4.2784126957,-5.3887499391,-2.0318534055<br/> N,2.4482113151,1.3436270345,-0.0899086808<br/> N,-0.0606242549,-2.7918455629,-0.0890989813<br/> N,-2.3875626576,1.4485763512,-0.0878646406<br/> Na,0.000354351,-0.000134316,2.2071298451</p>                                                                                                                                                                                                                                                                                                                                                                                                                                                                                                                                                                       |
| 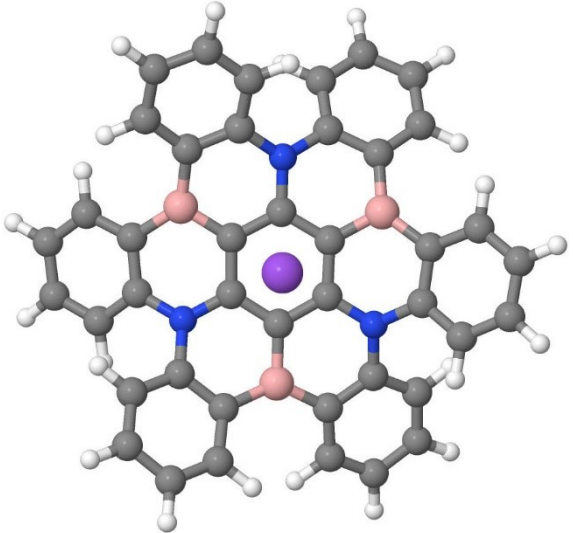 | <p><b>B<sub>3</sub>N<sub>3</sub>-NG-Na up</b><br/> <b>E=-2015.34908506H; FreqIm=0</b><br/> C,-0.4052511246,5.9294557896,2.0858739981<br/> C,0.7699886789,3.605181406,1.0474334357<br/> C,-0.6307975271,3.7673661195,0.9714872014<br/> C,1.5608866708,4.5751181836,1.6822390048<br/> C,0.974985978,5.7252838926,2.1877278289<br/> N,-2.7924797824,0.0025891962,0.5506187099<br/> N,1.3985278835,2.4171583323,0.5526685594<br/> C,-0.7138272331,1.2428841279,0.531786296<br/> C,-2.9425330782,2.4299822806,0.1000099752<br/> C,-1.4077452976,0.0029687513,0.5515379253<br/> C,3.1882675085,3.6525753914,-0.5593718777<br/> H,2.5288421125,4.5085665339,-0.6497418567<br/> C,2.738748589,2.4717768123,0.0550995427<br/> C,0.7065503428,1.2175980305,0.5524061342<br/> C,-3.6900533259,3.4990228067,-0.4342959872<br/> H,-3.2505805892,4.4928123153,-0.4303990739<br/> C,3.5756205594,1.3337138172,0.1008774387<br/> C,-3.5095629348,1.1362100969,0.0529806768<br/> C,-4.7563771928,0.9354034004,-0.5627199496<br/> H,-5.167848155,-0.0635811614,-0.6543835059<br/> C,-4.9387346217,3.3097873963,-1.0020165316<br/> C,4.47430869,3.723629242,-1.072665114<br/> H,4.8017249532,4.6418160846,-1.5510095884<br/> C,5.3354795494,2.6235677804,-1.0003404457<br/> C,4.8750496097,1.4469950836,-0.4336652165<br/> H,5.5159912447,0.5695326502,-0.4306257297<br/> C,-5.4605838032,2.013942881,-1.0757947123<br/> H,-6.419085249,1.8386993694,-1.5550259016<br/> C,1.4333839129,-0.0032442473,0.5324066578<br/> C,-0.3959634297,-5.9319619534,-1.0022158206<br/> C,0.7712758473,-3.6077725705,0.0542455363<br/> C,-0.6327940187,-3.7633261191,0.0997299082</p> |

|  |                                                                                                                                                                                                                                                                                                                                                                                                                                                                                                                                                                                                                                                                                                                                                                                                                                                                                                                                                                                                                                                                                                                                                                                                                                                                                                                                                                                                                                                                                                                                                                                                                                                                                                                                                                                                                                                                                                                                                                                                                           |
|--|---------------------------------------------------------------------------------------------------------------------------------------------------------------------------------------------------------------------------------------------------------------------------------------------------------------------------------------------------------------------------------------------------------------------------------------------------------------------------------------------------------------------------------------------------------------------------------------------------------------------------------------------------------------------------------------------------------------------------------------------------------------------------------------------------------------------------------------------------------------------------------------------------------------------------------------------------------------------------------------------------------------------------------------------------------------------------------------------------------------------------------------------------------------------------------------------------------------------------------------------------------------------------------------------------------------------------------------------------------------------------------------------------------------------------------------------------------------------------------------------------------------------------------------------------------------------------------------------------------------------------------------------------------------------------------------------------------------------------------------------------------------------------------------------------------------------------------------------------------------------------------------------------------------------------------------------------------------------------------------------------------------------------|
|  | <p> C,-1.184594312,-4.9449357982,-0.4354165017<br/> H,-2.2649982964,-5.0609247101,-0.4327256901<br/> C,1.5690089569,-4.5875147805,-0.5603555515<br/> H,2.6400519516,-4.4446490561,-0.6506191296<br/> C,0.9873173084,-5.7365121531,-1.0741312462<br/> H,1.6186420346,-6.4792076243,-1.5525722301<br/> N,1.3940830357,-2.4198360997,0.5521559916<br/> C,-0.7193789645,-1.2398199683,0.5317059018<br/> C,-2.9479562833,-2.4300624294,0.9688244824<br/> C,3.1817793886,-3.6397697068,1.6809403062<br/> H,2.513150536,-4.4847270851,1.8026279127<br/> C,2.7373808512,-2.4696035255,1.0465974386<br/> C,0.7012316231,-1.2208094873,0.55228314<br/> C,-3.6942734145,-3.503654079,1.4957150994<br/> H,-3.2582937818,-4.4986964164,1.4787094965<br/> C,3.5783911934,-1.3376659786,0.9706682166<br/> C,-3.5075639274,-1.1357188971,1.0448075557<br/> C,-4.7431298712,-0.9353813447,1.6792366319<br/> H,-5.1404444846,0.0661901727,1.8010161168<br/> C,-4.9342781876,-3.3153158542,2.0816910952<br/> C,4.4710998568,-3.7081391536,2.1855867312<br/> H,4.7947854557,-4.615492276,2.6864669046<br/> C,5.3383235486,-2.6151723179,2.0834589195<br/> C,4.8811998353,-1.4470421831,1.4978226657<br/> H,5.5248501522,-0.5718841168,1.4809655984<br/> C,-5.4469523652,-2.0177361782,2.1840557621<br/> H,-6.3944989476,-1.8443845373,2.6850758557<br/> C,-1.1879437924,4.949709164,1.4994086329<br/> H,-2.2677309089,5.0690401177,1.4824112722<br/> H,2.6270072231,4.4188958779,1.8039688752<br/> H,1.5987318213,6.4591595634,2.6890173553<br/> H,-0.8444410233,-6.8316611756,-1.4109198283<br/> H,-5.4866286932,-4.1560033988,2.4887480959<br/> H,-5.4937361331,4.1483195178,-1.4099940626<br/> H,-0.8575317399,6.8275969712,2.4936930326<br/> H,6.3390918208,2.6852342145,-1.4084970416<br/> H,6.3425989507,-2.6730872687,2.4904163657<br/> B,-1.4713438091,2.5556352198,0.5372004824<br/> B,-1.4776537548,-2.5521695936,0.5362698699<br/> B,2.9490797259,-0.0035559302,0.5374207226<br/> Na,0.0006106532,-0.0002384142,-1.7439907638 </p> |
|--|---------------------------------------------------------------------------------------------------------------------------------------------------------------------------------------------------------------------------------------------------------------------------------------------------------------------------------------------------------------------------------------------------------------------------------------------------------------------------------------------------------------------------------------------------------------------------------------------------------------------------------------------------------------------------------------------------------------------------------------------------------------------------------------------------------------------------------------------------------------------------------------------------------------------------------------------------------------------------------------------------------------------------------------------------------------------------------------------------------------------------------------------------------------------------------------------------------------------------------------------------------------------------------------------------------------------------------------------------------------------------------------------------------------------------------------------------------------------------------------------------------------------------------------------------------------------------------------------------------------------------------------------------------------------------------------------------------------------------------------------------------------------------------------------------------------------------------------------------------------------------------------------------------------------------------------------------------------------------------------------------------------------------|



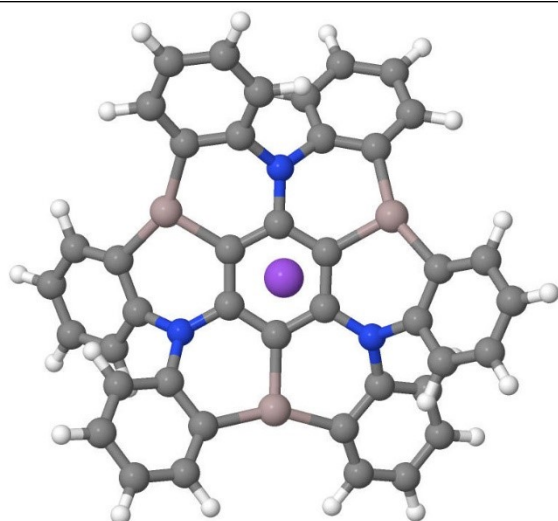

**Al<sub>3</sub>N<sub>3</sub>-NG-Na down**

**E=-2668,45767339H; FreqIm=0**

C,2.5994787682,-5.4485645193,1.9468810308  
 C,0.9035050173,-3.6373042156,0.6181596804  
 C,2.3075579609,-3.4621889238,0.541836779  
 C,0.3763312557,-4.693573262,1.3806409761  
 C,1.2132473892,-5.5874620846,2.0348132997  
 C,1.2185774708,-0.7452143767,-0.0453308149  
 C,4.1179224585,-0.4722836087,-0.7710518391  
 C,1.2348468629,0.6695063508,-0.0646206307  
 C,-0.5919289897,-4.7018680023,-1.4991098804  
 H,0.4765794608,-4.8934386428,-1.5280317972  
 C,-1.0764669863,-3.5931600243,-0.7840592262  
 C,-0.0370745075,-1.4047271859,-0.0645688484  
 C,5.3150782125,-0.7601336663,-1.4559572876  
 H,5.6876419114,-1.7822049917,-1.4601183278  
 C,-2.4685326986,-3.3296567918,-0.7699593818  
 C,3.6500902889,0.8650432341,-0.7831369627  
 C,4.368283867,1.8402848716,-1.4961681116  
 H,3.9998787086,2.8614434268,-1.5237771476  
 C,6.0381207676,0.2137193142,-2.1297234296  
 Al,2.8315184442,-1.7435985305,-0.140830408  
 C,-1.4589480226,-5.559384984,-2.1604117606  
 H,-1.0543823808,-6.4045519574,-2.7092709169  
 C,-2.8363761765,-5.3335864785,-2.130980521  
 C,-3.317329236,-4.221349424,-1.4551362666  
 H,-4.388731336,-4.0328270883,-1.4578569029  
 C,5.5447933242,1.5194645588,-2.1573395077  
 H,6.0746356755,2.2934084885,-2.7045988715  
 Al,-2.9256494604,-1.5802149535,-0.1387721743  
 C,-1.2540530962,-0.6831353249,-0.0450702145  
 C,-3.2031206665,5.1201516797,-2.1347085997  
 C,-2.5735583238,2.727223622,-0.7865436736  
 C,-1.6493902468,3.8011285798,-0.7746798423  
 C,-1.9984450975,4.9813785217,-1.4604267839  
 H,-1.2996885892,5.8151485729,-1.4647407224  
 C,-3.7769607801,2.8610482166,-1.5001557631  
 H,-4.4769453395,2.0312557099,-1.5273427004  
 C,-4.0871962063,4.0399509371,-2.1620650146  
 H,-5.0221728489,4.1115013779,-2.7097224107  
 C,0.0359816928,1.427224331,-0.0461066171  
 C,1.8438000193,3.7289797333,0.5421195628  
 C,-4.2494582505,2.022445857,1.3819445175  
 H,-3.822737477,3.0201763394,1.4361093096  
 C,-3.6000712784,1.036685639,0.6193687045  
 C,-1.1972755015,0.7339415864,-0.0652516176  
 C,2.2363865361,4.8988623612,1.2206036268  
 H,1.5965178424,5.7773173514,1.1722856109  
 C,-4.1508407669,-0.2667795303,0.5456043188  
 C,2.6969551117,2.600320448,0.6198490158  
 C,3.8736428306,2.6711934943,1.3848976098  
 H,4.5240794769,1.8027796017,1.4422816005  
 C,3.4154863336,4.9739329562,1.9509105994  
 Al,0.0942107356,3.3232694807,-0.142558444  
 C,-5.440747087,1.7457152104,2.0388774085  
 H,-5.9226784498,2.5262242207,2.6202042162

|                                                                                    |                                                                                                                                                                                                                                                                                                                                                                                                                                                                                                                                                                                                                                                                                                                                                                                                                                                                                                                                                                                                                                                                                                                                                                                                                                                                                                                                                                                                                                                                                                                                                                                                                                                                                                                                                                                                             |
|------------------------------------------------------------------------------------|-------------------------------------------------------------------------------------------------------------------------------------------------------------------------------------------------------------------------------------------------------------------------------------------------------------------------------------------------------------------------------------------------------------------------------------------------------------------------------------------------------------------------------------------------------------------------------------------------------------------------------------------------------------------------------------------------------------------------------------------------------------------------------------------------------------------------------------------------------------------------------------------------------------------------------------------------------------------------------------------------------------------------------------------------------------------------------------------------------------------------------------------------------------------------------------------------------------------------------------------------------------------------------------------------------------------------------------------------------------------------------------------------------------------------------------------------------------------------------------------------------------------------------------------------------------------------------------------------------------------------------------------------------------------------------------------------------------------------------------------------------------------------------------------------------------|
|                                                                                    | <p>C,-6.0139916068,0.4757609038,1.953614495<br/> C,-5.3597952587,-0.5098926903,1.2256998572<br/> H,-5.8005774422,-1.5034332124,1.1805673591<br/> C,4.2282118518,3.8425047336,2.0404007732<br/> H,5.1437373052,3.8705645407,2.6238564082<br/> C,3.124207075,-4.3881546099,1.2192309744<br/> H,4.2049109435,-4.2727460161,1.1721160837<br/> H,-0.7009569641,-4.8231096048,1.436899571<br/> H,0.7795737181,-6.3958796739,2.6159999185<br/> H,-3.4467258116,6.0455653842,-2.6467454503<br/> H,-6.9508035009,0.2594071099,2.4573571323<br/> H,3.6955443431,5.8943730377,2.453434721<br/> H,3.2564098557,-6.1521047288,2.4485384973<br/> H,6.9616456845,-0.0380555302,-2.6412258884<br/> H,-3.5168657968,-6.006601697,-2.642767431<br/> N,2.4813466403,1.3487258317,-0.0765060461<br/> N,-0.0724329602,-2.8238047557,-0.0772755187<br/> N,-2.4086859603,1.4738911338,-0.0786773253<br/> Na,0.0000242621,0.0003755974,2.1880614213</p>                                                                                                                                                                                                                                                                                                                                                                                                                                                                                                                                                                                                                                                                                                                                                                                                                                                                             |
| 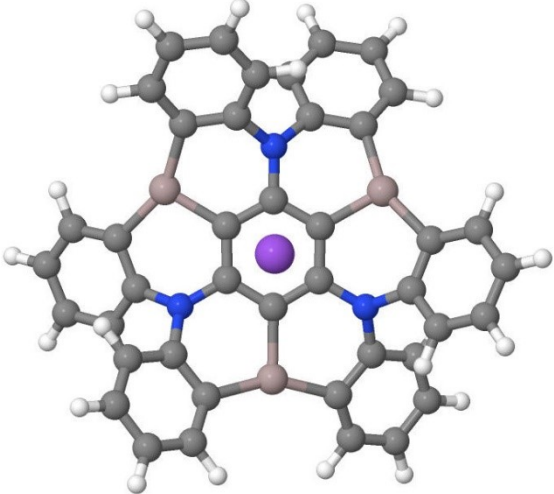 | <p><b>Al<sub>3</sub>N<sub>3</sub>-NG-Na up</b><br/> <b>E=-2667.87752426H; FreqIm=0</b><br/> C,4.1255313149,-4.4125733914,2.6238233189<br/> C,1.9747536132,-3.1887611119,1.2760192275<br/> C,3.2499981794,-2.5714680799,1.2645928723<br/> C,1.7948782934,-4.3864733454,1.9890918828<br/> C,2.8544842561,-4.989477516,2.6508074949<br/> N,1.9415821128,2.0512734655,0.5683305485<br/> N,0.8057965375,-2.7068220679,0.5685482294<br/> C,1.3890013536,-0.3322286342,0.5367380683<br/> C,4.0782697631,0.8236372177,-0.050201864<br/> C,0.9648917385,1.0212014049,0.5558164962<br/> C,0.8599666382,-4.6267218676,-0.8923997464<br/> H,1.9337242151,-4.470656909,-0.9487895008<br/> C,0.0757619878,-3.7458651575,-0.128185227<br/> C,0.4020515198,-1.3459262842,0.5560408906<br/> C,5.3098513429,0.9026927737,-0.7285250377<br/> H,5.994381011,0.0585496786,-0.6805322605<br/> C,-1.3252670803,-3.9433594077,-0.051409248<br/> C,3.206758076,1.9382014979,-0.1277637598<br/> C,3.5777670658,3.0575183685,-0.8921899063<br/> H,2.9055893384,3.9092422195,-0.9492489532<br/> C,5.6855701369,2.0232817223,-1.4582046065<br/> Al,3.2362919791,-0.7631886365,0.6336110604<br/> C,0.2849996995,-5.706879918,-1.5481791505<br/> H,0.9142253364,-6.37308611,-2.1309538929<br/> C,-1.089391871,-5.9347111983,-1.4598406842<br/> C,-1.8722979007,-5.049265261,-0.7302494588<br/> H,-2.9456262016,-5.220029313,-0.6827214293<br/> C,4.8010796123,3.0995631399,-1.5473152126<br/> H,5.0636695437,3.9774808592,-2.1301450277<br/> Al,-2.2788179253,-2.4210393735,0.6326044498<br/> C,-0.9820448339,-1.0365590031,0.536838462<br/> C,-4.5962488775,3.9102333681,-1.4590575424<br/> C,-3.2821445164,1.8072308899,-0.127777905<br/> C,-2.7527002955,3.1193511324,-0.0516486065<br/> C,-3.4375329146,4.1458210424,-0.7302743218</p> |

|                                                                                     |                                                                                                                                                                                                                                                                                                                                                                                                                                                                                                                                                                                                                                                                                                                                                                                                                                                                                                                                                                                                                                                                                                                                                                                                                                                                                                                                                                                                                                                                                                                                                                                                                                                                                                                                                                                                                                                    |
|-------------------------------------------------------------------------------------|----------------------------------------------------------------------------------------------------------------------------------------------------------------------------------------------------------------------------------------------------------------------------------------------------------------------------------------------------------------------------------------------------------------------------------------------------------------------------------------------------------------------------------------------------------------------------------------------------------------------------------------------------------------------------------------------------------------------------------------------------------------------------------------------------------------------------------------------------------------------------------------------------------------------------------------------------------------------------------------------------------------------------------------------------------------------------------------------------------------------------------------------------------------------------------------------------------------------------------------------------------------------------------------------------------------------------------------------------------------------------------------------------------------------------------------------------------------------------------------------------------------------------------------------------------------------------------------------------------------------------------------------------------------------------------------------------------------------------------------------------------------------------------------------------------------------------------------------------|
|                                                                                     | <p>H,-3.0488344407,5.1607873531,-0.6832426841<br/> C,-4.43747026,1.5681733613,-0.8913128894<br/> H,-4.839039535,0.5601542682,-0.9473238371<br/> C,-5.0860385116,2.6059628491,-1.5468303003<br/> H,-5.9779478733,2.3939038942,-2.1289967993<br/> N,-2.7469234697,0.6557234214,0.5689948823<br/> C,-0.406516017,1.3689740346,0.5363137175<br/> C,0.6017626708,4.1008390791,1.2618880451<br/> C,-4.6958172255,0.6380953823,1.9898605188<br/> H,-4.6060742494,1.7199565318,2.0177430525<br/> C,-3.7486146922,-0.1160900336,1.2762089434<br/> C,-1.3665069424,0.3250014456,0.5560118612<br/> C,0.630648075,5.3319390521,1.9464492603<br/> H,-0.2614544341,5.95449718,1.9500714172<br/> C,-3.8518843481,-1.5291274932,1.2635727747<br/> C,1.7740148246,3.3051544912,1.2747851427<br/> C,2.9006925104,3.749038479,1.9881826436<br/> H,3.7929488052,3.1307216414,2.0163013881<br/> C,1.7572218979,5.7808385104,2.6205936873<br/> Al,-0.9573304723,3.1842185368,0.6317176778<br/> C,-5.7479748815,0.0215583492,2.6510110329<br/> H,-6.4609717475,0.6305088798,3.1987704886<br/> C,-5.8841090695,-1.3676044486,2.6228421275<br/> C,-4.9324624512,-2.1192100492,1.9485752451<br/> H,-5.0259276473,-3.2030448716,1.9523096068<br/> C,2.8924603772,4.9687156895,2.648948111<br/> H,3.7762347715,5.2821873069,3.1965878235<br/> C,4.3009243724,-3.212345246,1.9501287334<br/> H,5.286193562,-2.7511818755,1.9548075299<br/> H,0.8131380401,-4.8498281762,2.01621291<br/> H,2.6833709202,-5.9116932354,3.1980498306<br/> H,-5.1071702802,4.7254086311,-1.9616803912<br/> H,1.7507733004,6.7381434045,3.1319183201<br/> H,6.6471546244,2.0576215728,-1.9605639845<br/> H,4.9572057066,-4.8859580798,3.1358291266<br/> H,-1.5402147521,-6.7844605596,-1.9626912084<br/> H,-6.7100539259,-1.8514987312,3.134297582<br/> Na,0.000542519,-0.00029574,-1.6969531605</p> |
| 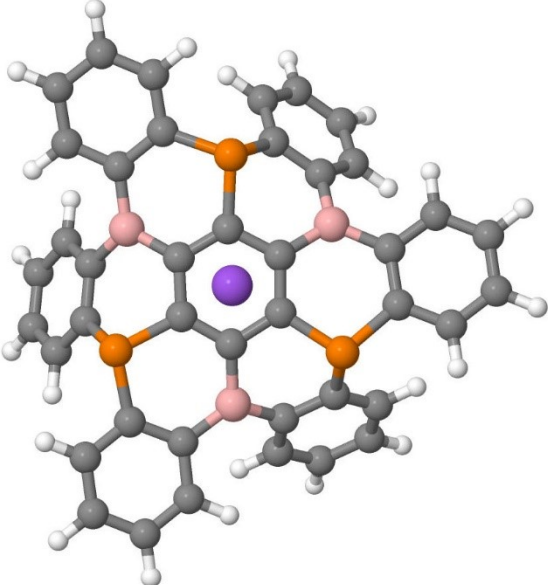 | <p><b>B<sub>3</sub>P<sub>3</sub>-NG-Na down</b><br/> <b>E=-2875,58769211H; FreqIm=0</b><br/> C,4.8390229395,1.0124233562,2.4484298896<br/> C,3.7072449732,-0.3499629495,0.2849725533<br/> C,3.3957429885,1.0215638823,0.4718635609<br/> C,4.5944309388,-1.0055822553,1.1382700167<br/> C,5.1551460079,-0.3247694179,2.2202655671<br/> P,-0.4831850514,3.1688789835,-1.2008282056<br/> P,2.985768336,-1.1665660178,-1.2012720412<br/> C,1.146874283,0.8598835464,-0.9351833253<br/> C,2.2976530359,3.2961808251,-0.5817969505<br/> C,-0.1482617312,1.3957439471,-0.9776836848<br/> C,4.1061982025,-3.6631165695,-1.0406043844<br/> H,5.0214691416,-3.1337652575,-1.2989118398<br/> C,2.912166701,-2.9529467273,-0.8627177066<br/> C,1.2827606501,-0.5694286432,-0.9776977529<br/> C,3.4890964467,4.045517648,-0.503183862<br/> H,4.4283043289,3.5254596639,-0.3332528931</p>                                                                                                                                                                                                                                                                                                                                                                                                                                                                                                                                                                                                                                                                                                                                                                                                                                                                                                                                                                        |

|                                                                                                                                                                                                                                                                                                                                                                                                                                                                                                                                                                                                                                                                                                                                                                                                                                                                                                                                                                                                                                                                                                                                                                                                                                                                                                                                                                                                                                                                                                                                                                                                                                                                                                                                                                                                                                                                                                                                                                                                                                                                                                                                                                                                                                                                                                                                                                                                                                                                                                                                                                                                                                                                                                                                                                                                          |
|----------------------------------------------------------------------------------------------------------------------------------------------------------------------------------------------------------------------------------------------------------------------------------------------------------------------------------------------------------------------------------------------------------------------------------------------------------------------------------------------------------------------------------------------------------------------------------------------------------------------------------------------------------------------------------------------------------------------------------------------------------------------------------------------------------------------------------------------------------------------------------------------------------------------------------------------------------------------------------------------------------------------------------------------------------------------------------------------------------------------------------------------------------------------------------------------------------------------------------------------------------------------------------------------------------------------------------------------------------------------------------------------------------------------------------------------------------------------------------------------------------------------------------------------------------------------------------------------------------------------------------------------------------------------------------------------------------------------------------------------------------------------------------------------------------------------------------------------------------------------------------------------------------------------------------------------------------------------------------------------------------------------------------------------------------------------------------------------------------------------------------------------------------------------------------------------------------------------------------------------------------------------------------------------------------------------------------------------------------------------------------------------------------------------------------------------------------------------------------------------------------------------------------------------------------------------------------------------------------------------------------------------------------------------------------------------------------------------------------------------------------------------------------------------------------|
| <p> C,1.705587357,-3.6381432583,-0.5809631304<br/> C,1.1009499912,3.9986354141,-0.8631895648<br/> C,1.1196378295,5.3876467896,-1.0428536622<br/> H,0.2038768362,5.9157709627,-1.3019218166<br/> C,3.5019371336,5.425459233,-0.6681600381<br/> B,2.3323880216,1.7527892777,-0.4255326259<br/> C,4.1303767503,-5.0495971265,-0.9196162875<br/> H,5.0643822103,-5.5871877627,-1.0530713834<br/> C,2.9485808943,-5.7453371944,-0.6644219379<br/> C,1.759467743,-5.0446476224,-0.5007841654<br/> H,0.8398587569,-5.5984990106,-0.3304982518<br/> C,2.3086471931,6.1012998752,-0.9233467152<br/> H,2.307743511,7.1787690829,-1.0582368736<br/> B,0.3512125727,-2.8965746665,-0.4255760532<br/> C,0.1709139769,-1.4230844274,-0.9347536773<br/> C,-6.4502802368,0.3192758645,-0.6670919977<br/> C,-4.013894622,-1.045990906,-0.8634981605<br/> C,-4.0039657074,0.3414728376,-0.5811469095<br/> C,-5.2488624188,0.9981743722,-0.5017791287<br/> H,-5.2683330709,2.0714796845,-0.3313444182<br/> C,-5.2260702415,-1.7243785421,-1.0433838097<br/> H,-5.2253421065,-2.781373493,-1.303123<br/> C,-6.4387804412,-1.0518690858,-0.9232457699<br/> H,-7.3713316928,-1.5915101056,-1.0583633579<br/> P,-2.5028619396,-2.0026183398,-1.2005742247<br/> C,-1.3184059146,0.5635638694,-0.9346391727<br/> C,-2.5826015595,2.4295246302,0.4735092039<br/> C,-3.1671097158,-3.4706756968,1.1427802988<br/> H,-4.1947810489,-3.1531088291,0.9887014694<br/> C,-2.1564072767,-3.0336760591,0.2870522325<br/> C,-1.1348329927,-0.8260154522,-0.977255864<br/> C,-3.4333826704,2.6035373041,1.58190304<br/> H,-4.2123844519,1.869685081,1.7726594701<br/> C,-0.8129864749,-3.4502159064,0.4738019282<br/> C,-1.5496817292,3.3841863845,0.2865527184<br/> C,-1.423283671,4.47903184,1.1412619199<br/> H,-0.634638527,5.2103587371,0.9867771394<br/> C,-3.2935170661,3.6831216853,2.4516352848<br/> B,-2.6848281323,1.1435295868,-0.4245736811<br/> C,-2.8574154501,-4.2943731372,2.2264217458<br/> H,-3.6479862321,-4.6158934277,2.8982290093<br/> C,-1.541357431,-4.6896775681,2.454288613<br/> C,-0.5371929648,-4.2719553351,1.5834865194<br/> H,0.4880974289,-4.5786439901,1.7743906082<br/> C,-2.2922662451,4.624240379,2.2239890212<br/> H,-2.1760536912,5.4704971749,2.8948814515<br/> C,3.9720657123,1.672225554,1.5796424424<br/> H,3.7248089471,2.7134551906,1.7705119344<br/> H,4.8350979836,-2.0538599287,0.9834298049<br/> H,5.8313110452,-0.8478334286,2.8903187117<br/> H,-7.3921062869,0.8560507839,-0.6098538616<br/> H,-1.2992256986,-5.3228917365,3.3021649961<br/> H,-3.9641206366,3.7914598173,3.2983909272<br/> H,5.2683464602,1.5394726727,3.2948284667<br/> H,4.4379223979,5.9724437527,-0.6117603354<br/> H,2.954991603,-6.8293624259,-0.6066932103<br/> Na,-0.0014052018,-0.0004635059,1.3648151864 </p> |
|----------------------------------------------------------------------------------------------------------------------------------------------------------------------------------------------------------------------------------------------------------------------------------------------------------------------------------------------------------------------------------------------------------------------------------------------------------------------------------------------------------------------------------------------------------------------------------------------------------------------------------------------------------------------------------------------------------------------------------------------------------------------------------------------------------------------------------------------------------------------------------------------------------------------------------------------------------------------------------------------------------------------------------------------------------------------------------------------------------------------------------------------------------------------------------------------------------------------------------------------------------------------------------------------------------------------------------------------------------------------------------------------------------------------------------------------------------------------------------------------------------------------------------------------------------------------------------------------------------------------------------------------------------------------------------------------------------------------------------------------------------------------------------------------------------------------------------------------------------------------------------------------------------------------------------------------------------------------------------------------------------------------------------------------------------------------------------------------------------------------------------------------------------------------------------------------------------------------------------------------------------------------------------------------------------------------------------------------------------------------------------------------------------------------------------------------------------------------------------------------------------------------------------------------------------------------------------------------------------------------------------------------------------------------------------------------------------------------------------------------------------------------------------------------------------|

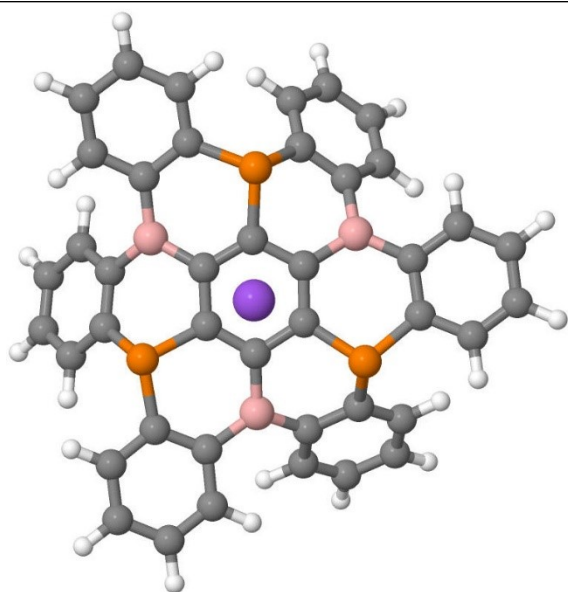

**B<sub>3</sub>P<sub>3</sub>-NG Na up**

**E=-2875.00807285H ; FreqIm=0**

C,-0.8950730656,-5.1822950852,-2.7615809015  
 C,0.4493815961,-3.8195679928,-0.7334738056  
 C,-0.928160896,-3.5555804725,-0.9341033842  
 C,1.1221715403,-4.7706390696,-1.4974090288  
 C,0.4482354085,-5.449709631,-2.5130126659  
 P,-3.1617656756,0.3569854201,0.6368342468  
 P,1.2707418868,-2.9166485978,0.6370714463  
 C,-0.8167286721,-1.1799894067,0.2701187879  
 C,-3.2225699458,-2.4256302387,0.0556474674  
 C,-1.398623256,0.0963483012,0.2981966615  
 C,3.7977611315,-3.976000091,0.544045782  
 H,3.2891519921,-4.9055155827,0.7925698348  
 C,3.0570294027,-2.8070536639,0.3248056855  
 C,0.6155456017,-1.2591250362,0.2990896095  
 C,-3.9376403305,-3.6411195342,0.0417225873  
 H,-3.3932930595,-4.5693178219,-0.1076101357  
 C,3.7118442502,-1.5779830776,0.0600408278  
 C,-3.9596671867,-1.2446199535,0.3227796089  
 C,-5.3422695278,-1.3023346382,0.5425112334  
 H,-5.893010437,-0.3977078602,0.7930583185  
 C,-5.3121817978,-3.6930960903,0.2401838522  
 B,-1.6791810217,-2.4250741253,-0.1500359546  
 C,5.1873733305,-3.957445308,0.4779987268  
 H,5.7481936237,-4.8736436669,0.6368069772  
 C,5.85383947,-2.7544553007,0.2467448287  
 C,5.1220602582,-1.5897088482,0.048450772  
 H,5.6541464125,-0.6541111298,-0.0989504574  
 C,-6.0208429678,-2.5150413385,0.4742382134  
 H,-7.0946073588,-2.5431721316,0.633590312  
 B,2.9401688189,-0.2413441943,-0.1460629527  
 C,1.429964752,-0.1169397649,0.2717507407  
 C,-0.5422793685,6.4471687968,0.2401665072  
 C,0.9014683274,4.0513840144,0.3224458553  
 C,-0.4899947396,4.0037085899,0.0557880303  
 C,-1.1848363259,5.2308972799,0.0420762531  
 H,-2.2609269434,5.2238339337,-0.1066964813  
 C,1.5431329833,5.2775386297,0.541635197  
 H,2.6020547791,5.3019995463,0.7917096113  
 C,0.8324163143,6.4716774349,0.4734724089  
 H,1.3452250911,7.4155742015,0.6323392902  
 P,1.8893432694,2.5597190649,0.637526094  
 C,-0.6140075003,1.2972938203,0.2698665564  
 C,-2.6163132101,2.581764598,-0.9334636078  
 C,3.5723061472,3.3566884215,-1.4951611158  
 H,3.2110334702,4.3685220189,-1.335997828  
 C,3.084038681,2.2991016585,-0.7311117002  
 C,0.782282879,1.1630117102,0.2990936635  
 C,-2.8969087614,3.4825887272,-1.9771929229  
 H,-2.1874756143,4.2749093201,-2.1993323293  
 C,3.5445937819,0.973958355,-0.9300168997  
 C,-3.5337768074,1.5208234817,-0.7325806393  
 C,-4.6945448891,1.4143602424,-1.4954184802  
 H,-5.3904144946,0.5961159545,-1.3345140013  
 C,-4.043053907,3.367279281,-2.7596239573

|                                                                                    |                                                                                                                                                                                                                                                                                                                                                                                                                                                                                                                                                                                                                                                                                                                                                                                                                                                                                                                                                                                                                                                                                                                                                                                                                                                                                                                                                                                                                                                                                                                                                                                                                                                                                                                                                                                                                           |
|------------------------------------------------------------------------------------|---------------------------------------------------------------------------------------------------------------------------------------------------------------------------------------------------------------------------------------------------------------------------------------------------------------------------------------------------------------------------------------------------------------------------------------------------------------------------------------------------------------------------------------------------------------------------------------------------------------------------------------------------------------------------------------------------------------------------------------------------------------------------------------------------------------------------------------------------------------------------------------------------------------------------------------------------------------------------------------------------------------------------------------------------------------------------------------------------------------------------------------------------------------------------------------------------------------------------------------------------------------------------------------------------------------------------------------------------------------------------------------------------------------------------------------------------------------------------------------------------------------------------------------------------------------------------------------------------------------------------------------------------------------------------------------------------------------------------------------------------------------------------------------------------------------------------|
|                                                                                    | <p>B,-1.261421534,2.6668149254,-0.1497716779<br/> C,4.4987928048,3.1118521323,-2.509303056<br/> H,4.8584756697,3.9367397785,-3.1172721036<br/> C,4.9392363004,1.8146709313,-2.7563137869<br/> C,4.4657329298,0.7653390616,-1.9728016006<br/> H,4.7975827739,-0.2454266513,-2.1933597914<br/> C,-4.946391765,2.3379112443,-2.5104799245<br/> H,-5.8411589945,2.2365212078,-3.117541394<br/> C,-1.5680815759,-4.2482439848,-1.9781743652<br/> H,-2.6091211158,-4.0300773186,-2.1997511746<br/> H,2.178782051,-4.9640721199,-1.3367577074<br/> H,0.9834457664,-6.17324788,-3.1208474666<br/> H,-1.1104245219,7.3720855982,0.2253556976<br/> H,-4.2272550768,4.0741103019,-3.5625768125<br/> H,-5.828981023,-4.6476499453,0.225134731<br/> H,-1.4151945879,-5.6946452436,-3.564850357<br/> H,6.9389355617,-2.7248777952,0.233559116<br/> H,5.6441060663,1.619892579,-3.558487237<br/> Na,-0.0007121682,0.0006620279,2.5836951722</p>                                                                                                                                                                                                                                                                                                                                                                                                                                                                                                                                                                                                                                                                                                                                                                                                                                                                                          |
| 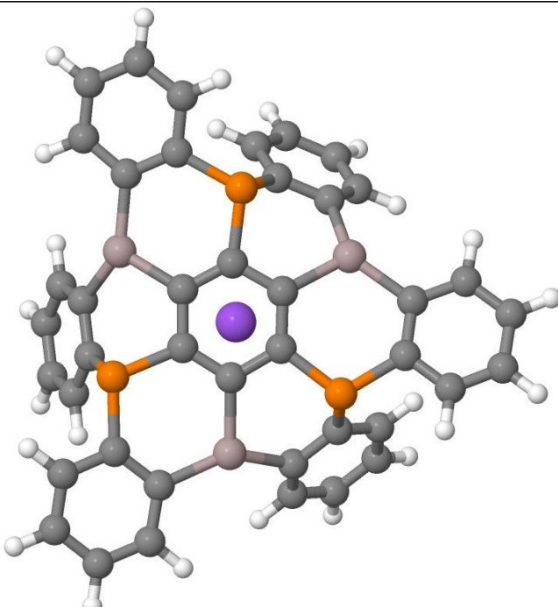 | <p><b>Al<sub>3</sub>P<sub>3</sub>-NG-Na down</b><br/> <b>E=-3528,24683866H; FreqIm=0</b><br/> C,4.8756273843,0.5762851361,2.7494393179<br/> C,3.7120220458,-0.4625282468,0.4149977653<br/> C,3.7331490936,0.9434733133,0.6201983581<br/> C,4.2681298721,-1.3186934082,1.3694852493<br/> C,4.8467226756,-0.7970720924,2.5310813209<br/> P,-0.6001062386,3.2026268269,-1.2310258405<br/> P,3.0735091276,-1.0814428175,-1.2302134476<br/> C,1.1346375157,0.8731406961,-1.1007585769<br/> C,2.2196273635,3.8994301614,-0.7288079514<br/> C,-0.1655416582,1.3944418147,-1.1016644882<br/> C,4.5664106971,-3.3305191249,-1.3308391842<br/> H,5.319057315,-2.6006714732,-1.6240798022<br/> C,3.2508143767,-2.9138767594,-1.0742014467<br/> C,1.2902145074,-0.5540031088,-1.1014059664<br/> C,3.1891674435,4.9137948177,-0.6271736417<br/> H,4.2145238942,4.6532874365,-0.3699500188<br/> C,2.267496265,-3.8719262175,-0.7274307482<br/> C,0.8983086463,4.2720873136,-1.0756045715<br/> C,0.6016115225,5.6196299096,-1.332862172<br/> H,-0.4067368555,5.9065225357,-1.6261930677<br/> C,2.8801036509,6.2522027823,-0.852959899<br/> Al,2.6108964083,2.0225538108,-0.5497402468<br/> C,4.9293991583,-4.6691870532,-1.2088118106<br/> H,5.9546899899,-4.9687867985,-1.4043357748<br/> C,3.9752794753,-5.6199612897,-0.8504187865<br/> C,2.6614319837,-5.2186487239,-0.6253851532<br/> H,1.9233198246,-5.9764390065,-0.3678773328<br/> C,1.5797303523,6.6031747196,-1.2114360578<br/> H,1.3268390887,7.6408622885,-1.4074799579<br/> Al,0.4463303179,-3.2724629005,-0.548785738<br/> C,0.188761407,-1.4194496379,-1.1003296458<br/> C,-6.8545676446,-0.6325453486,-0.8491306285<br/> C,-4.1488627162,-1.3582198776,-1.072412381<br/> C,-4.4868778548,-0.0272782082,-0.7268234802<br/> C,-5.8501833389,0.3049303373,-0.6250609824</p> |

|                                                                                     |                                                                                                                                                                                                                                                                                                                                                                                                                                                                                                                                                                                                                                                                                                                                                                                                                                                                                                                                                                                                                                                                                                                                                                                                                                                                                                                                                                                                                                                                                                                                                                                                                                                                                                                                                                                                                                                                                  |
|-------------------------------------------------------------------------------------|----------------------------------------------------------------------------------------------------------------------------------------------------------------------------------------------------------------------------------------------------------------------------------------------------------------------------------------------------------------------------------------------------------------------------------------------------------------------------------------------------------------------------------------------------------------------------------------------------------------------------------------------------------------------------------------------------------------------------------------------------------------------------------------------------------------------------------------------------------------------------------------------------------------------------------------------------------------------------------------------------------------------------------------------------------------------------------------------------------------------------------------------------------------------------------------------------------------------------------------------------------------------------------------------------------------------------------------------------------------------------------------------------------------------------------------------------------------------------------------------------------------------------------------------------------------------------------------------------------------------------------------------------------------------------------------------------------------------------------------------------------------------------------------------------------------------------------------------------------------------------------|
|                                                                                     | <p>H,-6.1375103001,1.3232288793,-0.3683913529<br/> C,-5.1673781304,-2.2895462922,-1.3280556259<br/> H,-4.9115006658,-3.306476739,-1.6204845624<br/> C,-6.5081875536,-1.9345384485,-1.2062712489<br/> H,-7.2802723069,-2.6728884297,-1.4009546812<br/> P,-2.4734820084,-2.1210325584,-1.2285779845<br/> C,-1.3237370694,0.5461213479,-1.1004044835<br/> C,-2.6829308684,2.7621717156,0.6201579184<br/> C,-3.2759391449,-3.0375810246,1.3709724984<br/> H,-4.2062780999,-2.4971077923,1.2181972961<br/> C,-2.2563033508,-2.9832342638,0.416561633<br/> C,-1.1249598281,-0.8405167942,-1.1007646001<br/> C,-3.3955203926,3.0180479877,1.801582036<br/> H,-4.3360254598,2.5014293701,1.987483256<br/> C,-1.0491113896,-3.7043895994,0.6215180107<br/> C,-1.4549681782,3.4470608502,0.4141887363<br/> C,-0.9920238636,4.3579971414,1.3678222503<br/> H,-0.0589668454,4.8935982948,1.2142869355<br/> C,-2.9362043574,3.9363741061,2.7487486796<br/> Al,-3.0570891385,1.2502543448,-0.5490345954<br/> C,-3.1132964973,-3.7997530108,2.5323440694<br/> H,-3.9157720115,-3.8359291866,3.2636808552<br/> C,-1.9381181964,-4.5110051395,2.7506181242<br/> C,-0.9137600353,-4.4497371783,1.8027197756<br/> H,0.0039893254,-5.0060121919,1.9879323571<br/> C,-1.7330240997,4.5987634656,2.5294159032<br/> H,-1.3630498514,5.3124648161,3.2600872899<br/> C,4.3109844263,1.4330644512,1.8015042853<br/> H,4.3341596869,2.5059743962,1.9868425467<br/> H,4.2647568465,-2.394618614,1.2167527546<br/> H,5.2787475993,-1.4742318905,3.2624702546<br/> H,-7.8988141486,-0.3485352767,-0.7606187482<br/> H,-1.8197489737,-5.119111589,3.6473074999<br/> H,-3.5154356989,4.1346365247,3.6455848255<br/> H,5.3366678483,0.9790388801,3.6463097842<br/> H,3.6483638293,7.0144135371,-0.7647610449<br/> H,4.2514827164,-6.6662870647,-0.7615841965<br/> Na,-0.0006829098,-0.0001342617,1.1905793367</p> |
| 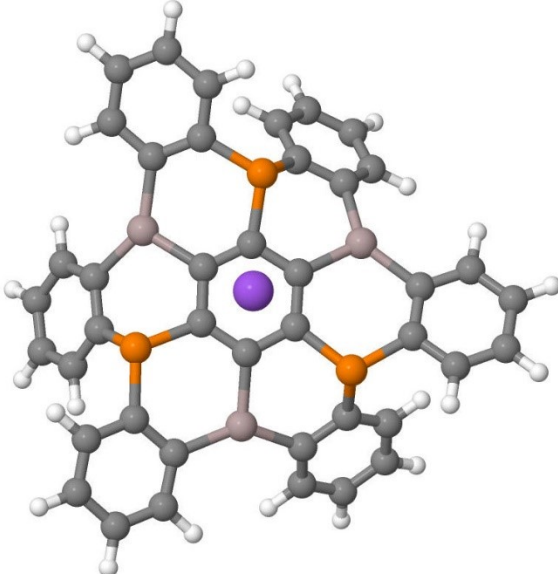 | <p><b>Al<sub>3</sub>P<sub>3</sub>-NG-Na up</b><br/> <b>E=-3527.61892303H; FreqIm=0</b><br/> C,-5.1175224142,2.0798414439,-2.8599208739<br/> C,-3.9114683475,0.6460030319,-0.7705121071<br/> C,-3.5425736371,1.9974864103,-0.9936845543<br/> C,-4.8630595667,0.0352337534,-1.5902345451<br/> C,-5.4606954552,0.7523251319,-2.6297688971<br/> P,1.4264215105,2.9125680305,0.74011197<br/> P,-3.2349710548,-0.2206985269,0.7362983174<br/> C,-0.8533881748,1.1506054913,0.4592628734<br/> C,-1.0751796369,4.3483950944,0.1676063991<br/> C,0.5420825793,1.2972412547,0.4514824624<br/> C,-5.2519659996,-2.0078141637,0.9693134033<br/> H,-5.7649446757,-1.1149596986,1.3232644662<br/> C,-3.9014051461,-1.9357148885,0.5916025713<br/> C,-1.3931295542,-0.1798341831,0.4519141204<br/> C,-1.7478461016,5.5830799537,0.1087463049<br/> H,-2.7883685608,5.6122754295,-0.2105387721</p>                                                                                                                                                                                                                                                                                                                                                                                                                                                                                                                                                                                                                                                                                                                                                                                                                                                                                                                                                                                                |

|                                                                                                                                                                                                                                                                                                                                                                                                                                                                                                                                                                                                                                                                                                                                                                                                                                                                                                                                                                                                                                                                                                                                                                                                                                                                                                                                                                                                                                                                                                                                                                                                                                                                                                                                                                                                                                                                                                                                                                                                                                                                                                                                                                                                                                                                                                                                                                                                                                                                                                                                                                                                                                                                                                                                                                                                 |
|-------------------------------------------------------------------------------------------------------------------------------------------------------------------------------------------------------------------------------------------------------------------------------------------------------------------------------------------------------------------------------------------------------------------------------------------------------------------------------------------------------------------------------------------------------------------------------------------------------------------------------------------------------------------------------------------------------------------------------------------------------------------------------------------------------------------------------------------------------------------------------------------------------------------------------------------------------------------------------------------------------------------------------------------------------------------------------------------------------------------------------------------------------------------------------------------------------------------------------------------------------------------------------------------------------------------------------------------------------------------------------------------------------------------------------------------------------------------------------------------------------------------------------------------------------------------------------------------------------------------------------------------------------------------------------------------------------------------------------------------------------------------------------------------------------------------------------------------------------------------------------------------------------------------------------------------------------------------------------------------------------------------------------------------------------------------------------------------------------------------------------------------------------------------------------------------------------------------------------------------------------------------------------------------------------------------------------------------------------------------------------------------------------------------------------------------------------------------------------------------------------------------------------------------------------------------------------------------------------------------------------------------------------------------------------------------------------------------------------------------------------------------------------------------------|
| <p> C,-3.2281106242,-3.1053584278,0.1661883203<br/> C,0.2725085726,4.3464451829,0.5992120658<br/> C,0.8821045439,5.5510542281,0.9849657071<br/> H,1.9102049045,5.5485337643,1.3435823708<br/> C,-1.1252393301,6.7792126683,0.4541660955<br/> Al,-1.9640445923,2.6575042174,-0.0881763954<br/> C,-5.9554777149,-3.2057641533,0.8825181692<br/> H,-7.0031964071,-3.2367168456,1.1665022237<br/> C,-5.3112684986,-4.3613236877,0.4432225566<br/> C,-3.9620467899,-4.3046251464,0.1056616396<br/> H,-3.4663130559,-5.2216192729,-0.2087371349<br/> C,0.195362144,6.7589618681,0.8999804095<br/> H,0.6899399421,7.6811623739,1.1902075681<br/> Al,-1.318353147,-3.031669776,-0.0833926038<br/> C,-0.5683959713,-1.3150796973,0.4595566<br/> C,6.4354632032,-2.4124569573,0.4368355547<br/> C,3.6301867245,-2.4071097965,0.5899625698<br/> C,4.3041219942,-1.2411601256,0.1552860443<br/> C,5.7096013287,-1.275729354,0.0924617418<br/> H,6.2541232773,-0.3893549981,-0.2289760112<br/> C,4.3700831377,-3.536910284,0.9743713477<br/> H,3.8551246654,-4.4257401812,1.3354780449<br/> C,5.7592083514,-3.5458858399,0.8854215547<br/> H,6.3116367084,-4.4348592838,1.1749684039<br/> P,1.812312213,-2.689485907,0.739467612<br/> C,1.4245219948,0.1646758206,0.4563459528<br/> C,3.4992257997,2.0747731776,-0.9959725573<br/> C,2.4025774919,-4.243877922,-1.5763696582<br/> H,3.4425956674,-3.9719696907,-1.4242847097<br/> C,1.3983866456,-3.7181318062,-0.7603394419<br/> C,0.8537483641,-1.1172521304,0.4506051923<br/> C,4.3997259894,2.265679353,-2.0546802502<br/> H,5.1563040652,1.5108220944,-2.263098049<br/> C,0.0431114855,-4.0743746057,-0.9811446864<br/> C,2.514778478,3.0701307986,-0.7663143552<br/> C,2.4619996087,4.2041011643,-1.5798071294<br/> H,1.7078250686,4.9686649004,-1.4207490775<br/> C,4.3564903681,3.4064346074,-2.8569099365<br/> Al,3.2833087714,0.3743022085,-0.0959047279<br/> C,2.0794022868,-5.1265566184,-2.6100099972<br/> H,2.8715123479,-5.5232663787,-3.2384831067<br/> C,0.75773513,-5.4929862786,-2.8379000832<br/> C,-0.2475323779,-4.9554371989,-2.0334217801<br/> H,-1.2806335507,-5.2342334624,-2.2350327576<br/> C,3.380162494,4.3674918937,-2.6200506208<br/> H,3.3229659901,5.2529390984,-3.2465320806<br/> C,-4.1548230352,2.685523479,-2.0518359552<br/> H,-3.8796026285,3.7192328841,-2.255218035<br/> H,-5.1472371432,-1.0012445108,-1.4363651072<br/> H,-6.1958765497,0.2617077461,-3.2611003612<br/> H,7.5193060303,-2.4115358718,0.3715608099<br/> H,5.073595909,3.5388596021,-3.6613024651<br/> H,-1.6676896069,7.7177387152,0.3916846213<br/> H,-5.5887336716,2.637296439,-3.6636688513<br/> H,-5.8534400421,-5.2999407802,0.3797275742<br/> H,0.5097549115,-6.1847194136,-3.637164763<br/> Na,0.0044313633,0.0002165528,2.7141327995 </p> |
|-------------------------------------------------------------------------------------------------------------------------------------------------------------------------------------------------------------------------------------------------------------------------------------------------------------------------------------------------------------------------------------------------------------------------------------------------------------------------------------------------------------------------------------------------------------------------------------------------------------------------------------------------------------------------------------------------------------------------------------------------------------------------------------------------------------------------------------------------------------------------------------------------------------------------------------------------------------------------------------------------------------------------------------------------------------------------------------------------------------------------------------------------------------------------------------------------------------------------------------------------------------------------------------------------------------------------------------------------------------------------------------------------------------------------------------------------------------------------------------------------------------------------------------------------------------------------------------------------------------------------------------------------------------------------------------------------------------------------------------------------------------------------------------------------------------------------------------------------------------------------------------------------------------------------------------------------------------------------------------------------------------------------------------------------------------------------------------------------------------------------------------------------------------------------------------------------------------------------------------------------------------------------------------------------------------------------------------------------------------------------------------------------------------------------------------------------------------------------------------------------------------------------------------------------------------------------------------------------------------------------------------------------------------------------------------------------------------------------------------------------------------------------------------------------|



**Table S6:** Geometries, energies (in Hartree) and Cartesian coordinates (in Å) of the complexes with a Na<sup>+</sup> cation in vacuum. Level of theory: M06-2X/6-311++G\*//M06-2X/6-31+G\*

|  |                                                                                                                                                                                                                                                                                                                                                                                                                                                                                                                                                                                                                                                                                                                                                                                                                                                                                                                                                                                                                                                                                                                                                                                                                                                                                                                                                                                                                                                                                                                                                                                                                                                                                                                                                                                                                                                                                                                                                                                                                                                                                                                                                                                                                                                                                                                                                                                                                                                                                                                                                                                                                                                                                                                                                                                                                                                                                                |
|--|------------------------------------------------------------------------------------------------------------------------------------------------------------------------------------------------------------------------------------------------------------------------------------------------------------------------------------------------------------------------------------------------------------------------------------------------------------------------------------------------------------------------------------------------------------------------------------------------------------------------------------------------------------------------------------------------------------------------------------------------------------------------------------------------------------------------------------------------------------------------------------------------------------------------------------------------------------------------------------------------------------------------------------------------------------------------------------------------------------------------------------------------------------------------------------------------------------------------------------------------------------------------------------------------------------------------------------------------------------------------------------------------------------------------------------------------------------------------------------------------------------------------------------------------------------------------------------------------------------------------------------------------------------------------------------------------------------------------------------------------------------------------------------------------------------------------------------------------------------------------------------------------------------------------------------------------------------------------------------------------------------------------------------------------------------------------------------------------------------------------------------------------------------------------------------------------------------------------------------------------------------------------------------------------------------------------------------------------------------------------------------------------------------------------------------------------------------------------------------------------------------------------------------------------------------------------------------------------------------------------------------------------------------------------------------------------------------------------------------------------------------------------------------------------------------------------------------------------------------------------------------------------|
|  | <p><b>B<sub>3</sub>N<sub>3</sub>-NG-Na:CO<sub>2</sub></b><br/> <b>E=-2203.88563344H; FreqIm=0</b></p> <p>C,2.7722643182,-5.4696401673,1.6329572485<br/> C,0.7935310295,-3.6646217664,0.8054111949<br/> C,2.1533258328,-3.3442963893,0.5994852044<br/> C,0.4375626107,-4.8523291512,1.4623680882<br/> C,1.4200551273,-5.744410349,1.863166072<br/> C,1.3447646263,-0.9341542936,0.2610794382<br/> C,3.7839180776,-1.3016130506,-0.4304372726<br/> C,1.5808046013,0.465809086,0.2568977265<br/> C,-1.6086500849,-4.500418396,-0.5963724595<br/> H,-0.7141351196,-5.0878510446,-0.7704140341<br/> C,-1.523189168,-3.2451890386,0.0299968953<br/> C,0.0082333349,-1.3875153692,0.4183032114<br/> C,4.7875634618,-2.0565383514,-1.0709713079<br/> H,4.708498284,-3.1401685951,-1.0597691604<br/> C,-2.6833586442,-2.4520879874,0.1851312822<br/> C,3.8770040271,0.1077600965,-0.4867852912<br/> C,4.9150824977,0.7161122789,-1.2127292275<br/> H,4.9561697986,1.7950698692,-1.3110277072<br/> C,5.836192785,-1.4583063175,-1.7487505008<br/> B,2.4928151287,-1.9161675414,0.1400337875<br/> C,-2.8367828385,-4.9858175149,-1.0183962774<br/> H,-2.8811562299,-5.9538402342,-1.5083842822<br/> C,-4.0038036286,-4.2341603607,-0.8420501169<br/> C,-3.9121393924,-2.9808051531,-0.2611572657<br/> H,-4.8044163226,-2.3663375025,-0.1731645209<br/> C,5.8834873225,-0.0623516499,-1.8276614059<br/> H,6.6734495693,0.4253019696,-2.3908990326<br/> B,-2.501064207,-0.9935598778,0.6389538939<br/> C,-1.0803826834,-0.4841566196,0.5261741483<br/> C,-1.5139987146,5.6933416813,-1.0592733165<br/> C,-1.7262744197,3.1281165799,0.0701480144<br/> C,-0.4568670889,3.7411618853,-0.0353012595<br/> C,-0.3877844607,5.0291944297,-0.6030062099<br/> H,0.5879709297,5.4941611996,-0.714968501<br/> C,-2.8668920379,3.788216866,-0.4214000818<br/> H,-3.8413737511,3.31465845,-0.3768552368<br/> C,-2.7556355764,5.0559055602,-0.9736763813<br/> H,-3.6477966647,5.5450547905,-1.3532040209<br/> C,0.5162307663,1.4031729783,0.3476097118<br/> C,2.246587128,3.2812285106,0.5710206687<br/> C,-3.840648175,2.3446305677,1.919036252<br/> H,-3.481888884,3.3630199582,2.0208251331<br/> C,-3.0893966958,1.3970419135,1.208283775<br/> C,-0.8026927518,0.9073818276,0.507374666<br/> C,2.6372026386,4.5503464457,1.0439356491<br/> H,1.8929260886,5.3405764158,1.0908473961<br/> C,-3.5077070294,0.0491962057,1.1556235126<br/> C,3.2130788171,2.2517230224,0.5643216219<br/> C,4.5004470998,2.486900687,1.0704860779<br/> H,5.2210162539,1.6787370489,1.1309712098<br/> C,3.9203512948,4.7978934709,1.5010664689<br/> B,0.785233229,2.8924627477,0.2936196473<br/> C,-5.032501522,1.9729867295,2.5220113567<br/> H,-5.5957745537,2.7141796058,3.0808522051<br/> C,-5.4937049051,0.6545635636,2.4422651094<br/> C,-4.7252882061,-0.2881967519,1.7809154927<br/> H,-5.0402838085,-1.328013124,1.7809326063</p> |
|--|------------------------------------------------------------------------------------------------------------------------------------------------------------------------------------------------------------------------------------------------------------------------------------------------------------------------------------------------------------------------------------------------------------------------------------------------------------------------------------------------------------------------------------------------------------------------------------------------------------------------------------------------------------------------------------------------------------------------------------------------------------------------------------------------------------------------------------------------------------------------------------------------------------------------------------------------------------------------------------------------------------------------------------------------------------------------------------------------------------------------------------------------------------------------------------------------------------------------------------------------------------------------------------------------------------------------------------------------------------------------------------------------------------------------------------------------------------------------------------------------------------------------------------------------------------------------------------------------------------------------------------------------------------------------------------------------------------------------------------------------------------------------------------------------------------------------------------------------------------------------------------------------------------------------------------------------------------------------------------------------------------------------------------------------------------------------------------------------------------------------------------------------------------------------------------------------------------------------------------------------------------------------------------------------------------------------------------------------------------------------------------------------------------------------------------------------------------------------------------------------------------------------------------------------------------------------------------------------------------------------------------------------------------------------------------------------------------------------------------------------------------------------------------------------------------------------------------------------------------------------------------------------|

|                                                                                    |                                                                                                                                                                                                                                                                                                                                                                                                                                                                                                                                                                                                                                                                                                                                                                                                                                                                                                                                                                                                                                                                                                                                                                                                                                                                                                                                                                                                                                                                                                                                                                                                                                                                                                                                                                                                                                                                                                                                                                                                                                                                                                                                                                                  |
|------------------------------------------------------------------------------------|----------------------------------------------------------------------------------------------------------------------------------------------------------------------------------------------------------------------------------------------------------------------------------------------------------------------------------------------------------------------------------------------------------------------------------------------------------------------------------------------------------------------------------------------------------------------------------------------------------------------------------------------------------------------------------------------------------------------------------------------------------------------------------------------------------------------------------------------------------------------------------------------------------------------------------------------------------------------------------------------------------------------------------------------------------------------------------------------------------------------------------------------------------------------------------------------------------------------------------------------------------------------------------------------------------------------------------------------------------------------------------------------------------------------------------------------------------------------------------------------------------------------------------------------------------------------------------------------------------------------------------------------------------------------------------------------------------------------------------------------------------------------------------------------------------------------------------------------------------------------------------------------------------------------------------------------------------------------------------------------------------------------------------------------------------------------------------------------------------------------------------------------------------------------------------|
|                                                                                    | <p>C,4.8464540443,3.7496877784,1.5261416437<br/> H,5.8419993532,3.9119569708,1.9280086202<br/> C,3.1217625836,-4.2762137604,1.0242713494<br/> H,4.1723995908,-4.0251591827,0.9076245434<br/> H,-0.6026186482,-5.065408605,1.6829541156<br/> H,1.1293891212,-6.6521282684,2.3832531029<br/> O,-2.0870494673,0.7326439218,-2.4580865442<br/> C,-3.2030380707,0.9731823455,-2.1896972327<br/> O,-4.3057432827,1.2047047128,-1.9476717228<br/> H,6.5950551334,-2.0611360601,-2.2369600684<br/> H,-1.4339525307,6.6831815586,-1.4967221559<br/> H,-6.4228752578,0.3697015266,2.9249769618<br/> H,-4.9604523651,-4.618952859,-1.1803259397<br/> H,3.5361405831,-6.167798598,1.9594618654<br/> H,4.1959415345,5.7808488113,1.8690684134<br/> Na,0.0183475764,0.0088326872,-1.9243507355<br/> N,2.8766810858,0.9339782374,0.1156811839<br/> N,-1.8596345991,1.8037710783,0.5952963971<br/> N,-0.2408956694,-2.7512823495,0.4227328166</p>                                                                                                                                                                                                                                                                                                                                                                                                                                                                                                                                                                                                                                                                                                                                                                                                                                                                                                                                                                                                                                                                                                                                                                                                                                                |
| 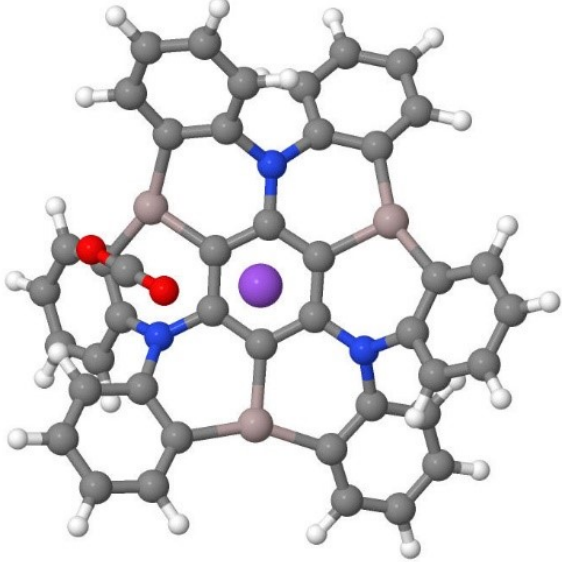 | <p><b>Al<sub>3</sub>N<sub>3</sub>-NG-Na:CO<sub>2</sub></b><br/> <b>E=-2856.41359738H; FreqIm=0</b><br/> C,1.9669638272,-5.8751688115,2.1294904345<br/> C,0.5381426521,-3.7545551363,0.9384124667<br/> C,1.9518490171,-3.7916459736,0.8391030255<br/> C,-0.1256696847,-4.7615781484,1.661609978<br/> C,0.5774722265,-5.80499918,2.2451678627<br/> C,1.304445968,-0.9305240218,0.204331511<br/> C,4.1754168631,-1.1494074118,-0.5742049491<br/> C,1.5561878211,0.4654112822,0.2080034328<br/> C,-1.3237837475,-4.4255816266,-1.1114382216<br/> H,-0.3127724805,-4.7791968807,-1.2950193639<br/> C,-1.5212147791,-3.317616817,-0.2718143084<br/> C,-0.0383151302,-1.3743471882,0.2976913155<br/> C,5.2567549018,-1.6548779299,-1.3218746057<br/> H,5.4733024368,-2.7202596305,-1.2819767499<br/> C,-2.8354267964,-2.8515447646,-0.0209179802<br/> C,3.916371587,0.2426131713,-0.6414186564<br/> C,4.712663781,1.0562466178,-1.466684267<br/> H,4.5098296959,2.1222551159,-1.5194031026<br/> C,6.0604569282,-0.8418983301,-2.1104906179<br/> Al,2.7419980191,-2.1694625031,0.2003970969<br/> C,-2.4028405971,-5.0912955499,-1.6782845518<br/> H,-2.2237649939,-5.9472424188,-2.32219874<br/> C,-3.7062149034,-4.6635438942,-1.4217034181<br/> C,-3.9039868547,-3.5498819054,-0.6140473891<br/> H,-4.9215907632,-3.2084644079,-0.4368785983<br/> C,5.7701595447,0.5212142949,-2.1896088417<br/> H,6.3696245187,1.1734112029,-2.8178311807<br/> Al,-2.8865588087,-1.0736155983,0.7175277275<br/> C,-1.1175312867,-0.4591537871,0.3532632425<br/> C,-2.2994606294,5.5705821071,-1.5346739286<br/> C,-1.9421853956,3.107841925,-0.2153919396<br/> C,-0.853673294,4.0099426059,-0.3159677622<br/> C,-1.0705549037,5.2305807134,-0.9853259539<br/> H,-0.2484828856,5.9377725019,-1.0726987262<br/> C,-3.1835569342,3.4535676158,-0.7804394618<br/> H,-4.0248330865,2.7733200535,-0.672399454<br/> C,-3.3589372539,4.6670048882,-1.4309416141<br/> H,-4.3284106699,4.9085553106,-1.8567637269<br/> C,0.5001747337,1.4071785548,0.2573503352<br/> C,2.6860657749,3.3980092595,0.7230461593<br/> C,-3.3430479638,2.7612355201,2.1912060088<br/> H,-2.7882781721,3.6874966878,2.0746107173</p> |

|                                                                                     |                                                                                                                                                                                                                                                                                                                                                                                                                                                                                                                                                                                                                                                                                                                                                                                                                                                                                                                                                                                                                                                                                                                                                                                                                                                                                                                                                                                                                                                                                                                                                                                                                                                          |
|-------------------------------------------------------------------------------------|----------------------------------------------------------------------------------------------------------------------------------------------------------------------------------------------------------------------------------------------------------------------------------------------------------------------------------------------------------------------------------------------------------------------------------------------------------------------------------------------------------------------------------------------------------------------------------------------------------------------------------------------------------------------------------------------------------------------------------------------------------------------------------------------------------------------------------------------------------------------------------------------------------------------------------------------------------------------------------------------------------------------------------------------------------------------------------------------------------------------------------------------------------------------------------------------------------------------------------------------------------------------------------------------------------------------------------------------------------------------------------------------------------------------------------------------------------------------------------------------------------------------------------------------------------------------------------------------------------------------------------------------------------|
|                                                                                     | <p>C,-2.993118974,1.6403925678,1.4212778351<br/> C,-0.822481034,0.9192047974,0.3667652816<br/> C,3.3216879078,4.5038337189,1.3214900415<br/> H,2.8194158782,5.4687668392,1.3136164119<br/> C,-3.7034567446,0.4273612687,1.5919574936<br/> C,3.3591293912,2.1509247355,0.7505392904<br/> C,4.6031465979,2.0518957402,1.3958025243<br/> H,5.1088768493,1.0915578092,1.4340907382<br/> C,4.5669554768,4.4078211564,1.9263328753<br/> Al,0.8347494694,3.2737579577,0.2421176445<br/> C,-4.3942017831,2.7035599553,3.0963717988<br/> H,-4.6394857414,3.5842429681,3.6824532983<br/> C,-5.1200049712,1.523884653,3.2613075289<br/> C,-4.7581128391,0.4049481528,2.5225010454<br/> H,-5.3132348473,-0.5187396273,2.6702087879<br/> C,5.1985971278,3.1637783746,1.9735905212<br/> H,6.1581796522,3.0553447906,2.4701954217<br/> C,2.630838029,-4.8663420526,1.4470876213<br/> H,3.7160336203,-4.9080125745,1.3821873731<br/> H,-1.2061546249,-4.7256384545,1.7614246886<br/> H,0.0355144645,-6.5637928368,2.8017467861<br/> O,-1.7954450966,0.7045004105,-2.7552395203<br/> C,-2.7923061099,0.4796774661,-2.1870538036<br/> O,-3.7821672055,0.2290594187,-1.6416506353<br/> H,6.8935497106,-1.2610017367,-2.6658851254<br/> H,-2.4351469763,6.5231035069,-2.0369977255<br/> H,-5.94502206,1.4776199396,3.9650113781<br/> H,-4.5526144902,-5.1868516425,-1.8553913618<br/> H,2.5180830474,-6.6943517738,2.5801051098<br/> H,5.0336511606,5.2806085268,2.3717625515<br/> Na,0.2918111239,0.0435519837,-2.0139264777<br/> N,2.8935700615,0.9328653131,0.1163956961<br/> N,-1.9114649535,1.8362636937,0.4695278405<br/> N,-0.318069569,-2.764402768,0.3205703711</p> |
| 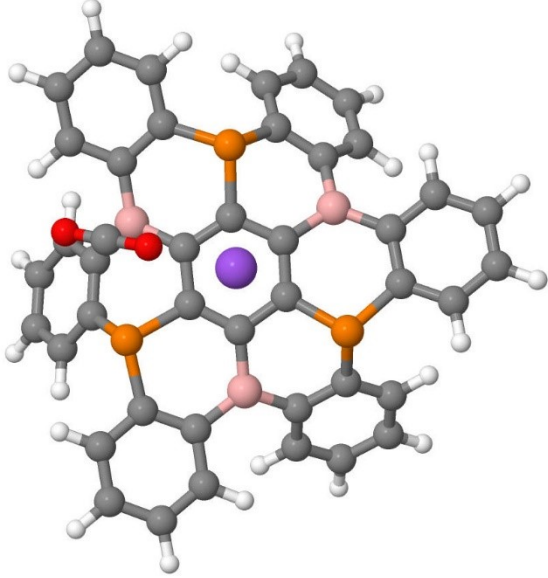 | <p><b>B<sub>3</sub>P<sub>3</sub>-NG-Na:CO<sub>2</sub></b><br/> <b>E=-3063.54419899H; FreqIm=0</b><br/> C,2.8452886594,-4.6608265484,2.1571975473<br/> C,0.9643326655,-3.7316303177,0.3196564867<br/> C,2.213064439,-3.0683544064,0.4103106077<br/> C,0.6844009586,-4.8551342605,1.0944656881<br/> C,1.6259688408,-5.317192906,2.014593207<br/> C,1.2826207789,-0.8174179772,-0.6731082882<br/> C,3.958883664,-1.2862440633,-0.730450212<br/> C,1.4518187083,0.5751411847,-0.7027504591<br/> C,-2.3021172891,-4.8588666538,-0.6621400392<br/> H,-1.5726189158,-5.5876943563,-1.0100954816<br/> C,-1.9172676116,-3.5285444928,-0.4465414678<br/> C,-0.0564791168,-1.3224506673,-0.5751988737<br/> C,5.0017351992,-2.230526996,-0.8304493376<br/> H,4.7764534366,-3.281037976,-0.6696481703<br/> C,-2.8716569121,-2.5585110093,-0.049889318<br/> C,4.2805704733,0.0645631089,-1.0161912358<br/> C,5.5885457133,0.4274477567,-1.363834727<br/> H,5.8166640522,1.458264819,-1.627953442<br/> C,6.302550581,-1.8648215606,-1.1551348195<br/> B,2.5130467571,-1.751925251,-0.3863873879<br/> C,-3.6205765059,-5.2560945141,-0.4643178988<br/> H,-3.9020825441,-6.2930220787,-0.6216224376<br/> C,-4.5822542942,-4.3120409445,-0.1035770499<br/> C,-4.2075833687,-2.9881895562,0.0909035716<br/> H,-4.9713466604,-2.2552287329,0.3361191937<br/> C,6.6010542028,-0.5257923139,-1.4060588355<br/> H,7.6130747095,-0.2283735128,-1.663950874</p>                                                                                                                                                                                                                   |

|  |                                                                                                                                                                                                                                                                                                                                                                                                                                                                                                                                                                                                                                                                                                                                                                                                                                                                                                                                                                                                                                                                                                                                                                                                                                                                                                                                                                                                                                                                                                                                                                                                                                                                                                                                                                                                                                                                                                                                                                                                                                                                                                                                                                                                                                                                                                                                                                                                          |
|--|----------------------------------------------------------------------------------------------------------------------------------------------------------------------------------------------------------------------------------------------------------------------------------------------------------------------------------------------------------------------------------------------------------------------------------------------------------------------------------------------------------------------------------------------------------------------------------------------------------------------------------------------------------------------------------------------------------------------------------------------------------------------------------------------------------------------------------------------------------------------------------------------------------------------------------------------------------------------------------------------------------------------------------------------------------------------------------------------------------------------------------------------------------------------------------------------------------------------------------------------------------------------------------------------------------------------------------------------------------------------------------------------------------------------------------------------------------------------------------------------------------------------------------------------------------------------------------------------------------------------------------------------------------------------------------------------------------------------------------------------------------------------------------------------------------------------------------------------------------------------------------------------------------------------------------------------------------------------------------------------------------------------------------------------------------------------------------------------------------------------------------------------------------------------------------------------------------------------------------------------------------------------------------------------------------------------------------------------------------------------------------------------------------|
|  | <p> B,-2.5107105461,-1.0571799522,0.1524646224<br/> C,-1.164440106,-0.4782847106,-0.4155800514<br/> C,-1.2576033556,6.3719538416,-0.3271312508<br/> C,-1.9174116964,3.6538229585,-0.3487770584<br/> C,-0.5550714561,4.0259014427,-0.2291574373<br/> C,-0.2625025015,5.4053089908,-0.2419072927<br/> H,0.7758451612,5.7226198993,-0.2046505376<br/> C,-2.9173255526,4.629488633,-0.4529269947<br/> H,-3.9559359496,4.3337170602,-0.5883018468<br/> C,-2.593702379,5.9821304103,-0.4146737963<br/> H,-3.3795815708,6.7282938483,-0.4835403427<br/> C,0.3514622117,1.4842836359,-0.5580993018<br/> C,1.9898357711,3.3060002012,0.4945552388<br/> C,-4.0287269486,2.1659908694,1.7218731565<br/> H,-4.0038919461,3.2416294891,1.5724036228<br/> C,-3.3372924361,1.313420905,0.8644240207<br/> C,-0.934458658,0.9354273877,-0.4557797841<br/> C,2.0922298396,4.2458201805,1.5365392272<br/> H,1.2045069756,4.7867414011,1.8523309832<br/> C,-3.3589436344,-0.0912313986,1.048634286<br/> C,3.1577466597,2.5716975061,0.1709521506<br/> C,4.3680808607,2.8170971483,0.8156971046<br/> H,5.2569936607,2.2470836731,0.5617147904<br/> C,3.293222544,4.47840839,2.2018164337<br/> B,0.5987641682,2.9818213571,-0.1514922776<br/> C,-4.723024662,1.6408650971,2.8124739304<br/> H,-5.2409980146,2.3116675923,3.4915737533<br/> C,-4.7310979924,0.2678259151,3.0416944144<br/> C,-4.0581535683,-0.5810528773,2.1664050724<br/> H,-4.0516987477,-1.6483654194,2.3702693097<br/> C,4.4332629928,3.7701058388,1.8327357104<br/> H,5.3740342427,3.9409388435,2.3476923584<br/> C,3.1291715837,-3.5540160234,1.3611843016<br/> H,4.0739605791,-3.0359007022,1.5004871655<br/> H,-0.2765491571,-5.3557016921,1.0177476575<br/> H,1.3933482211,-6.17933904,2.6326951134<br/> O,-2.1318662591,-0.2537554135,-3.5303601335<br/> C,-3.1614008733,-0.3852383689,-2.9824827471<br/> O,-4.1767736462,-0.5335139052,-2.4570066205<br/> H,7.0792916735,-2.6199784926,-1.2252702009<br/> H,-0.9943128036,7.4251040987,-0.3368126769<br/> H,-5.2548963302,-0.1399954144,3.9005312071<br/> H,-5.6206308453,-4.6070067825,0.0117520036<br/> H,3.5701405641,-5.0061801297,2.8876601226<br/> H,3.3375243266,5.204939015,3.0070892957<br/> Na,0.0581318767,0.0832283555,-2.9203259341<br/> P,3.0138840357,1.354387484,-1.1943034654<br/> P,-2.4401282958,1.9347017263,-0.6108059809<br/> P,-0.2203088068,-3.0934088565,-0.9288507583 </p> |
|--|----------------------------------------------------------------------------------------------------------------------------------------------------------------------------------------------------------------------------------------------------------------------------------------------------------------------------------------------------------------------------------------------------------------------------------------------------------------------------------------------------------------------------------------------------------------------------------------------------------------------------------------------------------------------------------------------------------------------------------------------------------------------------------------------------------------------------------------------------------------------------------------------------------------------------------------------------------------------------------------------------------------------------------------------------------------------------------------------------------------------------------------------------------------------------------------------------------------------------------------------------------------------------------------------------------------------------------------------------------------------------------------------------------------------------------------------------------------------------------------------------------------------------------------------------------------------------------------------------------------------------------------------------------------------------------------------------------------------------------------------------------------------------------------------------------------------------------------------------------------------------------------------------------------------------------------------------------------------------------------------------------------------------------------------------------------------------------------------------------------------------------------------------------------------------------------------------------------------------------------------------------------------------------------------------------------------------------------------------------------------------------------------------------|

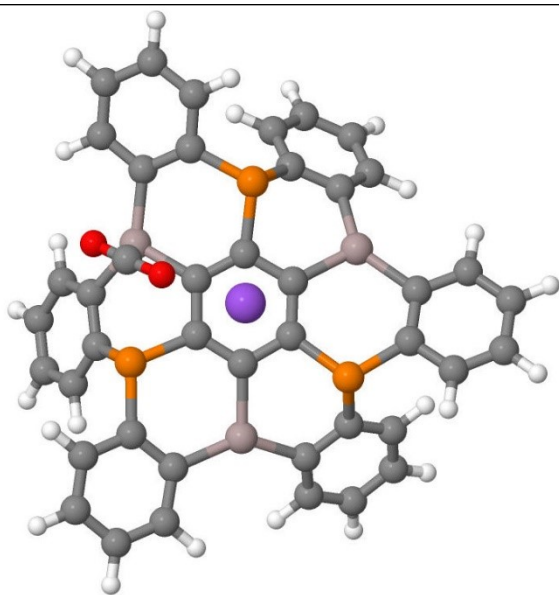

**Al<sub>3</sub>P<sub>3</sub>-NG-Na:CO<sub>2</sub>**

**E=-3716.15642260H ; FreqIm=0**

C,2.3517345426,-5.1935109682,2.3693169451  
 C,0.7617176004,-3.8923508268,0.4566772216  
 C,2.1415395054,-3.5765987204,0.5495851129  
 C,0.2014000545,-4.8400207524,1.3163401006  
 C,0.9960277919,-5.4846864409,2.2676212982  
 C,1.2544611029,-0.8312055699,-0.769724616  
 C,4.4561817594,-1.1722696305,-0.7967495426  
 C,1.4547401584,0.5575879378,-0.7586971369  
 C,-2.1128227948,-5.0934901267,-1.0278244581  
 H,-1.2903052244,-5.6250056744,-1.5038137501  
 C,-1.9422678812,-3.759478061,-0.6224217074  
 C,-0.0880070255,-1.3219196198,-0.6395973994  
 C,5.6645473939,-1.8902259634,-0.8669190399  
 H,5.6850914655,-2.9362819461,-0.5656140477  
 C,-3.0229261172,-3.0598905092,-0.036748162  
 C,4.4637455829,0.1813803613,-1.2085743495  
 C,5.6476379828,0.7532080889,-1.701715766  
 H,5.6492019885,1.7864194462,-2.045409032  
 C,6.8443944784,-1.3059875896,-1.3187804322  
 Al,2.7654942953,-2.0041450636,-0.3900295695  
 C,-3.3170141175,-5.7574888757,-0.8123215525  
 H,-3.4236386326,-6.7936453737,-1.1194368643  
 C,-4.3831706828,-5.0874837689,-0.2142526608  
 C,-4.2332854467,-3.7521104408,0.1501757648  
 H,-5.085688891,-3.2342607382,0.5870539409  
 C,6.8312125242,0.0217688861,-1.7432868563  
 H,7.7391109668,0.4871655868,-2.1153395701  
 Al,-2.8679086065,-1.1526521619,0.2066597367  
 C,-1.1870515762,-0.4584451599,-0.520047235  
 C,-2.0173864547,6.5809695023,-0.3541855471  
 C,-2.1300756498,3.7792784189,-0.5106555006  
 C,-0.901795343,4.4074629657,-0.1962917146  
 C,-0.8785110583,5.8127455883,-0.1285418553  
 H,0.0551659568,6.3232744889,0.1017066332  
 C,-3.2660179935,4.5605712451,-0.7756533312  
 H,-4.2057808321,4.079599544,-1.0421963967  
 C,-3.2149249301,5.9487799123,-0.6847439781  
 H,-4.1080629162,6.5346586267,-0.88054441  
 C,0.3609580188,1.4796752326,-0.6451857044  
 C,2.4802986015,3.4779153464,0.6138981636  
 C,-3.7615064613,2.6045053222,1.8462764157  
 H,-3.4768478734,3.636122163,1.663116843  
 C,-3.36157038,1.5861431963,0.9776096615  
 C,-0.933193822,0.9539658041,-0.5171962445  
 C,2.8075028938,4.3662003383,1.6492160207  
 H,2.1047939992,5.1482911555,1.9324093722  
 C,-3.7320910445,0.2418269548,1.2361860067  
 C,3.4117130412,2.4594054415,0.2855087209  
 C,4.6177940419,2.3618648894,0.9829986101  
 H,5.3347847789,1.5810442597,0.7486330295  
 C,4.019865935,4.2785972115,2.3341777836  
 Al,0.6918430811,3.3250891099,-0.1103006442  
 C,-4.5313011955,2.3057313022,2.9728542157  
 H,-4.8301614099,3.1075999002,3.6417795037  
 C,-4.9093477589,0.99485073,3.2408947172  
 C,-4.4977582327,-0.0238381943,2.3809977376  
 H,-4.784137925,-1.0484013533,2.6132506457  
 C,4.9163790264,3.2689929224,2.0027746322  
 H,5.8566278562,3.1768768625,2.5387211305  
 C,2.9088545373,-4.2355173318,1.5217158296  
 H,3.9672741173,-4.0013873021,1.6247442347

|                                                                                    |                                                                                                                                                                                                                                                                                                                                                                                                                                                                                                                                                                                                                                                                                                                                                                                                                                                                                                                                                                                                                                                                                                                                                                                                                                                                                                                                                                                                                                                                                                                                                                                                                                                                                                                                                                                                                                                                                                                                                                                                                                                                                                                                                                                                                                                                                                                                                                               |
|------------------------------------------------------------------------------------|-------------------------------------------------------------------------------------------------------------------------------------------------------------------------------------------------------------------------------------------------------------------------------------------------------------------------------------------------------------------------------------------------------------------------------------------------------------------------------------------------------------------------------------------------------------------------------------------------------------------------------------------------------------------------------------------------------------------------------------------------------------------------------------------------------------------------------------------------------------------------------------------------------------------------------------------------------------------------------------------------------------------------------------------------------------------------------------------------------------------------------------------------------------------------------------------------------------------------------------------------------------------------------------------------------------------------------------------------------------------------------------------------------------------------------------------------------------------------------------------------------------------------------------------------------------------------------------------------------------------------------------------------------------------------------------------------------------------------------------------------------------------------------------------------------------------------------------------------------------------------------------------------------------------------------------------------------------------------------------------------------------------------------------------------------------------------------------------------------------------------------------------------------------------------------------------------------------------------------------------------------------------------------------------------------------------------------------------------------------------------------|
|                                                                                    | <p>H,-0.8550277711,-5.0846071593,1.2626103158<br/> H,0.5438111915,-6.2157295752,2.9316307752<br/> O,-2.2261363126,-0.1167048654,-3.5941939655<br/> C,-3.1285788494,-0.4004167344,-2.90798799<br/> O,-4.021221389,-0.716121529,-2.2399848819<br/> H,7.763355674,-1.8832168244,-1.3548788801<br/> H,-1.9701403355,7.6637337477,-0.2878089474<br/> H,-5.5132683797,0.7653024728,4.1135116043<br/> H,-5.3272372367,-5.5980232589,-0.0492969439<br/> H,2.9688236127,-5.7012161406,3.1043462952<br/> H,4.2573858566,4.9870049043,3.1219355669<br/> Na,0.019544787,0.1460969107,-2.9438223612<br/> P,3.0656651897,1.3858206168,-1.1995942814<br/> P,-2.4887551824,1.9738819669,-0.6224212358<br/> P,-0.2276678269,-3.1553053202,-0.9430395137</p>                                                                                                                                                                                                                                                                                                                                                                                                                                                                                                                                                                                                                                                                                                                                                                                                                                                                                                                                                                                                                                                                                                                                                                                                                                                                                                                                                                                                                                                                                                                                                                                                                                    |
| 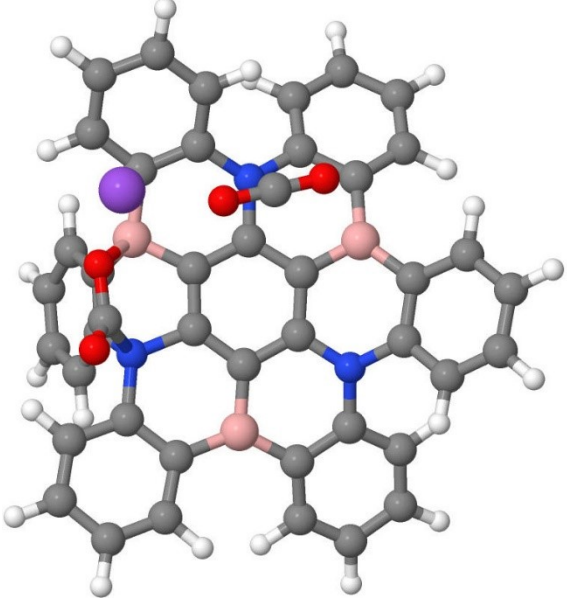 | <p><b>1CO<sub>2</sub>-B<sub>3</sub>N<sub>3</sub>-NG-Na:CO<sub>2</sub></b><br/> <b>E=-2392.37077558; FreqIm=0</b><br/> C,-2.9643039164,5.3837009397,1.5251495801<br/> C,-0.8640921134,3.7306296738,0.646255784<br/> C,-2.2082254144,3.3070854107,0.4678503941<br/> C,-0.5950847139,4.9490503571,1.2950905202<br/> C,-1.6310923843,5.7636320786,1.7177739029<br/> N,-2.6072278115,-1.1160440754,-0.2096442055<br/> N,0.2329797143,2.9058945288,0.2670790117<br/> C,-1.2266136372,0.9970576789,0.0526351012<br/> C,-3.7651510678,1.1291753921,-0.4418843821<br/> C,-1.2961891535,-0.3887163385,0.0049993027<br/> C,1.5365102416,4.7345430294,-0.6894973216<br/> H,0.613855248,5.2585700903,-0.9133606848<br/> C,1.5011491097,3.4767072761,-0.0669699809<br/> C,0.0737548691,1.5286869666,0.2268848174<br/> C,-4.9423569633,1.7981786992,-0.8294373599<br/> H,-4.9410046235,2.882914719,-0.848929903<br/> C,2.7011957139,2.755964511,0.1409698131<br/> C,-3.8003228476,-0.2712515659,-0.5132546753<br/> C,-4.9429684295,-0.9720492549,-0.8919561954<br/> H,-4.9380138763,-2.0577017335,-0.9262307853<br/> C,-6.08838706,1.1198776539,-1.220519262<br/> B,-2.4577061655,1.8699208302,-0.012671254<br/> C,2.7494505198,5.3012942653,-1.0497310845<br/> H,2.7548452773,6.2704975727,-1.5394707188<br/> C,3.9517336457,4.6257773741,-0.8164839212<br/> C,3.9121632083,3.3652431308,-0.2446180615<br/> H,4.8356662515,2.8051499632,-0.124528671<br/> C,-6.0929107247,-0.2751509736,-1.236047517<br/> H,-6.981704694,-0.821726263,-1.5341498677<br/> B,2.5939919759,1.2770413881,0.5562103434<br/> C,1.2081512845,0.6923816009,0.3607701871<br/> C,1.9062986074,-5.5816509611,-0.9029352729<br/> C,1.9971870404,-2.9231344576,0.043755106<br/> C,0.7545828766,-3.6043308888,-0.0062075834<br/> C,0.7538547401,-4.9392105167,-0.454421893<br/> H,-0.1959074638,-5.4744019919,-0.4594686265<br/> C,3.1504723368,-3.5545827146,-0.4599693251<br/> H,4.0907070551,-3.0122033066,-0.488122547<br/> C,3.105476776,-4.8629335122,-0.9265815816<br/> H,4.0131483418,-5.3225760277,-1.3059462073<br/> N,2.1110987212,-1.5689620456,0.4970619258<br/> C,-0.2455438855,-1.2535608941,0.1580607335<br/> C,-1.7913444901,-2.9850963315,1.1836512369<br/> C,4.1071346292,-2.0057552957,1.8415715625<br/> H,3.8222749725,-3.0492264299,1.9209817871<br/> C,3.3013330131,-1.1001247769,1.1334228551</p> |

|                                                                                     |                                                                                                                                                                                                                                                                                                                                                                                                                                                                                                                                                                                                                                                                                                                                                                                                                                                                                                                                                                                                                                                                                                                                                                                                                                                                                                                                                                                                                                                                                                                                                                                                                           |
|-------------------------------------------------------------------------------------|---------------------------------------------------------------------------------------------------------------------------------------------------------------------------------------------------------------------------------------------------------------------------------------------------------------------------------------------------------------------------------------------------------------------------------------------------------------------------------------------------------------------------------------------------------------------------------------------------------------------------------------------------------------------------------------------------------------------------------------------------------------------------------------------------------------------------------------------------------------------------------------------------------------------------------------------------------------------------------------------------------------------------------------------------------------------------------------------------------------------------------------------------------------------------------------------------------------------------------------------------------------------------------------------------------------------------------------------------------------------------------------------------------------------------------------------------------------------------------------------------------------------------------------------------------------------------------------------------------------------------|
|                                                                                     | <p>C,1.0236631822,-0.7024962592,0.3459456268<br/> C,-1.9145625357,-3.8465361397,2.2706992321<br/> H,-1.1319205736,-4.5767147437,2.4617487807<br/> C,3.6268199562,0.2781671866,1.119167817<br/> C,-2.8174265921,-2.0569028118,0.9794188431<br/> C,-3.9129169615,-1.9288072829,1.8191221069<br/> H,-4.6766136874,-1.1762204769,1.6637599933<br/> C,-3.017286581,-3.7647457844,3.1242867578<br/> B,-0.5956138843,-2.7808180974,0.1500687752<br/> C,5.2544195402,-1.5651954053,2.4842283804<br/> H,5.8566576412,-2.2791351051,3.038161399<br/> C,5.617195839,-0.2156058194,2.4527361396<br/> C,4.7970580747,0.6831586772,1.7908479075<br/> H,5.0364497184,1.7426578166,1.8197145077<br/> C,-4.0015998708,-2.8060169544,2.9039901414<br/> H,-4.8476430318,-2.7250873917,3.5786643302<br/> C,-3.2313887236,4.1673500719,0.9259280036<br/> H,-4.2628416193,3.8393632127,0.8465298533<br/> H,0.4282992954,5.2410869119,1.500056961<br/> H,-1.3972972284,6.6913439791,2.2314583405<br/> O,-2.8001314119,-1.7091585005,-2.5397991257<br/> C,-2.270938684,-1.992897334,-1.5129276468<br/> O,-1.3893190906,-2.9009583326,-1.2708156103<br/> O,1.5979014572,-1.5140866104,-2.8098559723<br/> C,2.4674401237,-0.8190115698,-2.4411810858<br/> O,3.3312368671,-0.1356496012,-2.0997913302<br/> H,-6.9746964753,1.6717331264,-1.5171465062<br/> H,4.8969867498,5.0709301086,-1.1098896448<br/> H,-3.7725997561,6.017835492,1.8743492534<br/> H,6.5094861837,0.1251761487,2.9677070268<br/> H,-3.1006979675,-4.4395805206,3.9706296957<br/> H,1.8749016314,-6.6164525918,-1.230139207<br/> Na,0.3493982911,-3.4376008439,-2.6361526506</p> |
| 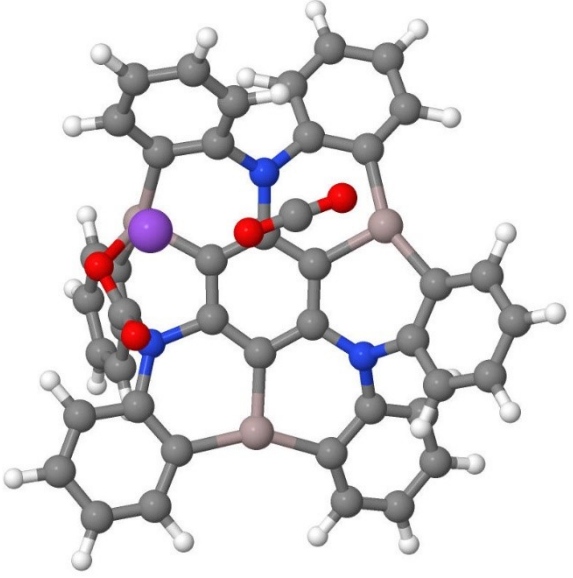 | <p><b>1CO<sub>2</sub>-Al<sub>3</sub>N<sub>3</sub>-NG-Na:CO<sub>2</sub></b><br/> <b>E=-3044.94145858H; FreqIm=0</b><br/> C,-4.3473800268,4.7779334331,1.492011545<br/> C,-2.0307258203,3.4536379277,0.5733961627<br/> C,-3.3085527831,2.8828709622,0.3384441138<br/> C,-1.9422193892,4.6558511294,1.2970693425<br/> C,-3.0803467086,5.307946796,1.7466118908<br/> N,-1.9896967955,-1.9533199234,-0.0559224313<br/> N,-0.774809102,2.9277000588,0.0882304686<br/> C,-1.4346197142,0.5708145229,0.0447378712<br/> C,-4.1359146047,-0.6023558547,-0.6489883007<br/> C,-1.004259326,-0.7362595978,0.1191104212<br/> C,-0.5700323438,4.833228057,-1.3803030361<br/> H,-1.6326689,4.7182064092,-1.5724850719<br/> C,0.07807731,3.9268295248,-0.5222650361<br/> C,-0.4182964086,1.5544811831,0.1731324349<br/> C,-5.4642896229,-0.7057177521,-1.1106010028<br/> H,-6.0705469182,0.1952055343,-1.1712686646<br/> C,1.4701381132,4.0629352558,-0.2939495743<br/> C,-3.4041844877,-1.7948479151,-0.5931627091<br/> C,-3.9609119514,-3.0193571859,-0.9673619177<br/> H,-3.3817966784,-3.9372461957,-0.8815839545<br/> C,-6.0332547371,-1.9134713737,-1.4928436988<br/> Al,-3.2363881801,1.0515549964,-0.1993322724<br/> C,0.1222997131,5.8800425521,-1.9715831367<br/> H,-0.4067627665,6.562940632,-2.6298173478<br/> C,1.4866266829,6.0498555303,-1.7298795319<br/> C,2.139629972,5.1354248493,-0.9147638269<br/> H,3.2089486756,5.2535917884,-0.7518366556<br/> C,-5.2704109966,-3.0789985567,-1.4220054137</p>                                                                                                                     |

|  |                                                                                                                                                                                                                                                                                                                                                                                                                                                                                                                                                                                                                                                                                                                                                                                                                                                                                                                                                                                                                                                                                                                                                                                                                                                                                                                                                                                                                                                                                                                                                                                                                                                                                                                                                                                                                                                                                                                                                                                                                                                                                                                                                                                                                                                                                                                                                                                                                                                                                                      |
|--|------------------------------------------------------------------------------------------------------------------------------------------------------------------------------------------------------------------------------------------------------------------------------------------------------------------------------------------------------------------------------------------------------------------------------------------------------------------------------------------------------------------------------------------------------------------------------------------------------------------------------------------------------------------------------------------------------------------------------------------------------------------------------------------------------------------------------------------------------------------------------------------------------------------------------------------------------------------------------------------------------------------------------------------------------------------------------------------------------------------------------------------------------------------------------------------------------------------------------------------------------------------------------------------------------------------------------------------------------------------------------------------------------------------------------------------------------------------------------------------------------------------------------------------------------------------------------------------------------------------------------------------------------------------------------------------------------------------------------------------------------------------------------------------------------------------------------------------------------------------------------------------------------------------------------------------------------------------------------------------------------------------------------------------------------------------------------------------------------------------------------------------------------------------------------------------------------------------------------------------------------------------------------------------------------------------------------------------------------------------------------------------------------------------------------------------------------------------------------------------------------|
|  | <p> H,-5.693254654,-4.0352734261,-1.71269203<br/> Al,2.2959684087,2.508601235,0.4727887179<br/> C,0.9331397359,1.1930293173,0.3409814753<br/> C,4.192177812,-3.9989987763,-1.471860989<br/> C,3.0945243389,-1.7993494731,-0.0847324492<br/> C,2.452138216,-3.0649661721,0.0031836597<br/> C,3.0319363996,-4.1352196093,-0.7134605491<br/> H,2.5593540263,-5.1153678607,-0.6652566922<br/> C,4.2741364782,-1.6700166832,-0.8453562729<br/> H,4.773256998,-0.7041246075,-0.8826766308<br/> C,4.8152213798,-2.7499925631,-1.5305561661<br/> H,5.7226021203,-2.6151560242,-2.1119063102<br/> N,2.6303662529,-0.5847644056,0.5418776797<br/> C,0.2920056779,-1.1714175827,0.3090228815<br/> C,-0.931177002,-3.3818000597,1.8080043768<br/> C,4.5374468428,-0.6246269672,2.0215119632<br/> H,4.4138235654,-1.7030891907,2.058000028<br/> C,3.6371087937,0.1518818099,1.2717686401<br/> C,1.2682603448,-0.172201505,0.4072890304<br/> C,-1.0791872938,-4.0024971505,3.0525576796<br/> H,-0.2358601491,-4.5400550536,3.4781199747<br/> C,3.7768066973,1.5621288785,1.2557835899<br/> C,-2.0580611349,-2.7078304672,1.2977889988<br/> C,-3.2495834787,-2.6124859552,2.0142504985<br/> H,-4.108477141,-2.0744275425,1.6329568965<br/> C,-2.2687615081,-3.9415343291,3.7765008539<br/> Al,0.5994939703,-3.0529916747,0.6430656123<br/> C,5.5819022497,-0.0337290448,2.7183307377<br/> H,6.2593674639,-0.6589832006,3.2923953042<br/> C,5.7507318225,1.3510839676,2.6950687609<br/> C,4.8435451571,2.1238424151,1.9823220338<br/> H,4.9658320412,3.2049136448,1.9869104149<br/> C,-3.3461119361,-3.2329230392,3.2594197127<br/> H,-4.2751362284,-3.1564398367,3.8152250604<br/> C,-4.4425913641,3.5730799238,0.8116503394<br/> H,-5.4292517228,3.1472288038,0.6411619721<br/> H,-0.9638051464,5.083123483,1.4955933328<br/> H,-2.9769885334,6.2327790906,2.3063847062<br/> O,-1.40269166,-2.2188106023,-2.333492579<br/> C,-1.2280189905,-2.6776632289,-1.2323054741<br/> O,-0.4057481,-3.594065749,-0.8954341842<br/> O,1.8148007206,-0.3820348228,-2.7732667499<br/> C,2.4468871688,0.5144082092,-2.3736614509<br/> O,3.0863126607,1.4083703036,-2.0083821065<br/> H,-7.0603123742,-1.9508097314,-1.8419230954<br/> H,2.0297792944,6.8723348415,-2.1846497945<br/> H,-5.2397424634,5.2903213663,1.8371434574<br/> H,6.5676109722,1.8167289792,3.2372247857<br/> H,-2.3481583095,-4.4321458152,4.7417207702<br/> H,4.6117013137,-4.851200232,-1.9978859601<br/> Na,1.1004560622,-2.5763026749,-2.456741129 </p> |
|--|------------------------------------------------------------------------------------------------------------------------------------------------------------------------------------------------------------------------------------------------------------------------------------------------------------------------------------------------------------------------------------------------------------------------------------------------------------------------------------------------------------------------------------------------------------------------------------------------------------------------------------------------------------------------------------------------------------------------------------------------------------------------------------------------------------------------------------------------------------------------------------------------------------------------------------------------------------------------------------------------------------------------------------------------------------------------------------------------------------------------------------------------------------------------------------------------------------------------------------------------------------------------------------------------------------------------------------------------------------------------------------------------------------------------------------------------------------------------------------------------------------------------------------------------------------------------------------------------------------------------------------------------------------------------------------------------------------------------------------------------------------------------------------------------------------------------------------------------------------------------------------------------------------------------------------------------------------------------------------------------------------------------------------------------------------------------------------------------------------------------------------------------------------------------------------------------------------------------------------------------------------------------------------------------------------------------------------------------------------------------------------------------------------------------------------------------------------------------------------------------------|



**1CO<sub>2</sub>-B<sub>3</sub>P<sub>3</sub>-NG-Na:CO<sub>2</sub>**

**E=-3252.08574139H; FreqIm=0**

C,0.1874397551,-5.2102071807,2.8168875972  
C,-0.9392810808,-3.6613252238,0.7864378545  
C,0.4745088154,-3.7038524645,0.9061272977  
C,-1.7562438862,-4.4111109747,1.6302521292  
C,-1.1931359107,-5.1837671868,2.6462588515  
P,3.4298276914,-0.4611490389,-1.0182972148  
P,-1.613034799,-2.6393613489,-0.5864487313  
C,0.8430200334,-1.4065485476,-0.3928327144  
C,2.9225715695,-3.1446767029,-0.2214712221  
C,1.6967357012,-0.3001336095,-0.5405759163  
C,-4.3127842299,-3.0568216863,-0.2321235887  
H,-4.0428782558,-4.0829891844,-0.4754082688  
C,-3.3070367737,-2.0763122841,-0.1394163556  
C,-0.5601767863,-1.1793688358,-0.3357415529  
C,3.357016526,-4.4855257814,-0.1616468265  
H,2.6306875672,-5.2627275966,0.0587081356  
C,-3.6610927422,-0.7270900628,0.0982874265  
C,3.8859218678,-2.1687877176,-0.589025201  
C,5.2084101028,-2.5461942469,-0.860676928  
H,5.9264658625,-1.8042504764,-1.2038442063  
C,4.675018953,-4.8509662027,-0.4050312252  
B,1.4256914456,-2.7965311259,0.0375310865  
C,-5.6545448134,-2.7386958472,-0.0486725522  
H,-6.4103047535,-3.5156510664,-0.1132755466  
C,-6.0210704165,-1.4150384016,0.2018984158  
C,-5.0315587924,-0.4346797848,0.2670080958  
H,-5.3199401669,0.5970375506,0.4725001237  
C,5.6102988591,-3.8719974859,-0.7393827057  
H,6.6420598269,-4.1446534318,-0.9406547328  
B,-2.6178918076,0.4920076805,0.1183688015  
C,-1.0944130363,0.1027755995,-0.2410655967  
C,1.9537791064,6.0646312677,-1.1083902257  
C,0.180365573,4.0598197631,-0.4332711325  
C,1.5596066668,3.728848138,-0.4915564923  
C,2.4231701437,4.7770372068,-0.8453177802  
H,3.4865674952,4.57408657,-0.9361556976  
C,-0.3033615448,5.3464820477,-0.6803478652  
H,-1.3694903281,5.5549359571,-0.6360013082  
C,0.5950506734,6.3567775425,-1.0153208543  
H,0.2323360999,7.3592843694,-1.21772224  
P,-0.9692730056,2.7416726235,-0.1048479223  
C,1.2061077644,1.0315009785,-0.4707150662  
C,3.552774589,1.9972518387,0.3136414519  
C,-1.7771196105,3.5013473237,2.5092964813  
H,-1.1642208053,4.3969413566,2.4433878683  
C,-1.8617717861,2.6070929107,1.4456845626  
C,-0.1696100736,1.1556804986,-0.3068776777  
C,4.1817730516,2.9441709402,1.1454374578  
H,3.7038695956,3.9064871753,1.3103335961  
C,-2.6324222227,1.4254481044,1.4601263689  
C,4.1797611478,0.728279984,0.1681865541  
C,5.3921169346,0.4643450961,0.8042465065  
H,5.8680761809,-0.5061542,0.7006368776  
C,5.3801657847,2.6706692266,1.7962104955  
B,2.1339723278,2.270102693,-0.26385784  
C,-2.4926204907,3.205969753,3.6687362219  
H,-2.4485252648,3.8784385083,4.5193745062  
C,-3.2534182956,2.0390698029,3.7326252323  
C,-3.3219713005,1.1620906543,2.6457092346  
H,-3.9195800832,0.2573457183,2.7284648513  
C,5.9838431091,1.4276041136,1.6212987387

|                                                                                    |                                                                                                                                                                                                                                                                                                                                                                                                                                                                                                                                                                                                                                                                                                                                                                                                                                                                                                                                                                                                                                                                                                                                                                                                                                                                                                                                                                                                                                                                                                                                                                                                                                                                                                                                                                                                                                                                                                                                                                                                                                                                                                                                                                                                                                                                |
|------------------------------------------------------------------------------------|----------------------------------------------------------------------------------------------------------------------------------------------------------------------------------------------------------------------------------------------------------------------------------------------------------------------------------------------------------------------------------------------------------------------------------------------------------------------------------------------------------------------------------------------------------------------------------------------------------------------------------------------------------------------------------------------------------------------------------------------------------------------------------------------------------------------------------------------------------------------------------------------------------------------------------------------------------------------------------------------------------------------------------------------------------------------------------------------------------------------------------------------------------------------------------------------------------------------------------------------------------------------------------------------------------------------------------------------------------------------------------------------------------------------------------------------------------------------------------------------------------------------------------------------------------------------------------------------------------------------------------------------------------------------------------------------------------------------------------------------------------------------------------------------------------------------------------------------------------------------------------------------------------------------------------------------------------------------------------------------------------------------------------------------------------------------------------------------------------------------------------------------------------------------------------------------------------------------------------------------------------------|
|                                                                                    | <p>H,6.9137452867,1.1965177313,2.1328675525<br/> C,1.0016486031,-4.4801508074,1.9540888778<br/> H,2.0758181768,-4.4902227229,2.116020582<br/> H,-2.8374386312,-4.3735266641,1.532273411<br/> H,-1.8389629206,-5.7468480174,3.3137504011<br/> O,-3.0865154691,1.4878431255,-1.0680696065<br/> C,-2.3842344491,2.5634044163,-1.3446507036<br/> O,-2.5759500188,3.3297113385,-2.2513224729<br/> O,0.0357807125,-0.5827288913,-3.4644908083<br/> C,-1.1135006172,-0.5589820027,-3.37523167<br/> O,-2.2839436674,-0.527596261,-3.3122692165<br/> H,2.6553578709,6.8442413266,-1.3894913489<br/> H,5.8363667271,3.4162688045,2.4397004077<br/> H,4.9705277057,-5.8942802154,-0.352133406<br/> H,0.6291774131,-5.792741746,3.619389946<br/> H,-7.0647342987,-1.1524734756,0.3494265309<br/> H,-3.8002874041,1.8076780921,4.6420742112<br/> Na,-4.2785297775,0.053130673,-2.3226143206</p>                                                                                                                                                                                                                                                                                                                                                                                                                                                                                                                                                                                                                                                                                                                                                                                                                                                                                                                                                                                                                                                                                                                                                                                                                                                                                                                                                                             |
| 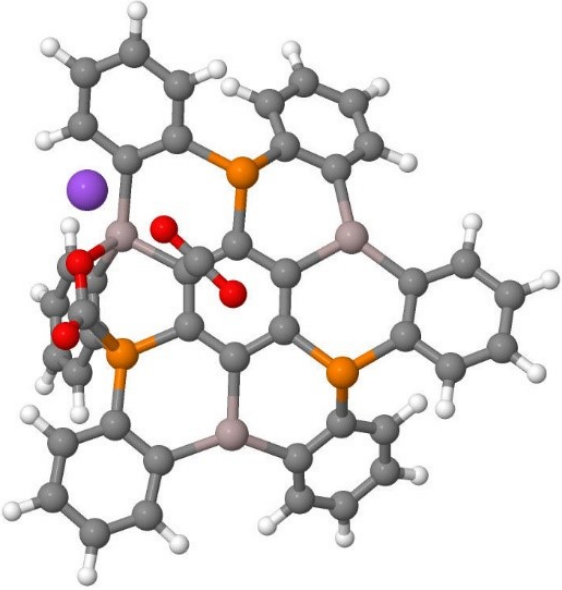 | <p><b>1CO<sub>2</sub>-Al<sub>3</sub>P<sub>3</sub>-NG-Na:CO<sub>2</sub></b><br/> <b>E=-3904.72178471H; FreqIm=0</b><br/> C,-0.4793541436,-5.801193089,2.7995527342<br/> C,-1.1913924184,-3.8546591108,0.9109755437<br/> C,0.1670787641,-4.2575522863,1.0139402139<br/> C,-2.1591501131,-4.4190974886,1.7440280597<br/> C,-1.8017839559,-5.388449044,2.6843479253<br/> P,3.4701373577,-0.5028395408,-1.0028331816<br/> P,-1.6427115459,-2.6968446193,-0.4718842381<br/> C,0.8278968026,-1.4601639539,-0.355924406<br/> C,3.4274736995,-3.3458316751,-0.2273674166<br/> C,1.6929829179,-0.3640104765,-0.4813360029<br/> C,-4.2684748149,-3.3504815914,-0.5964255628<br/> H,-3.8188023622,-4.2750730846,-0.9554775287<br/> C,-3.4375555787,-2.2819139547,-0.2041259316<br/> C,-0.5640578037,-1.2200521752,-0.1849082789<br/> C,4.1327824035,-4.5612360782,-0.1360352378<br/> H,3.6223918972,-5.4494372888,0.2331640364<br/> C,-4.0292456538,-1.0640040707,0.2277026705<br/> C,4.1168452252,-2.2129219206,-0.7254953711<br/> C,5.4502270374,-2.3466935002,-1.148970327<br/> H,5.9723487878,-1.4897571473,-1.5718476261<br/> C,5.4665532553,-4.6734609366,-0.5140098254<br/> Al,1.5292931553,-3.2130558657,0.0901131944<br/> C,-5.6559385742,-3.2552414215,-0.5414518173<br/> H,-6.2673272949,-4.1021449518,-0.8386825949<br/> C,-6.2531421431,-2.0681989185,-0.1162665704<br/> C,-5.4406548592,-0.9958034981,0.2526770587<br/> H,-5.9217460473,-0.0774131457,0.5921937005<br/> C,6.1244698638,-3.5572966088,-1.0296312987<br/> H,7.1590521536,-3.6310640755,-1.3516698981<br/> Al,-2.9026377156,0.5114057126,0.5310796854<br/> C,-1.0822750377,0.0666048359,-0.0418151849<br/> C,1.3399659658,6.5649192728,-1.109470371<br/> C,-0.0016133362,4.1946994919,-0.5737765821<br/> C,1.4151902507,4.1736009352,-0.5837828833<br/> C,2.0544526709,5.3940087314,-0.8557353037<br/> H,3.1416313857,5.435982713,-0.8789928622<br/> C,-0.7294699247,5.3634346637,-0.8299134046<br/> H,-1.8167959401,5.3531026649,-0.8252074067<br/> C,-0.0530191924,6.5493231403,-1.1014203803<br/> H,-0.6143192181,7.4550647775,-1.3076093162<br/> P,-0.984494198,2.7509816666,-0.1234276983<br/> C,1.2006729151,0.9720951718,-0.4675264513<br/> C,4.1159729647,1.9341779459,0.2991435648</p> |

|                                                                                     |                                                                                                                                                                                                                                                                                                                                                                                                                                                                                                                                                                                                                                                                                                                                                                                                                                                                                                                                                                                                                                                                                                                                                                                                                                                                                                                                                                                                                                                                                                                                                                                                                                                                                                                                                                   |
|-------------------------------------------------------------------------------------|-------------------------------------------------------------------------------------------------------------------------------------------------------------------------------------------------------------------------------------------------------------------------------------------------------------------------------------------------------------------------------------------------------------------------------------------------------------------------------------------------------------------------------------------------------------------------------------------------------------------------------------------------------------------------------------------------------------------------------------------------------------------------------------------------------------------------------------------------------------------------------------------------------------------------------------------------------------------------------------------------------------------------------------------------------------------------------------------------------------------------------------------------------------------------------------------------------------------------------------------------------------------------------------------------------------------------------------------------------------------------------------------------------------------------------------------------------------------------------------------------------------------------------------------------------------------------------------------------------------------------------------------------------------------------------------------------------------------------------------------------------------------|
|                                                                                     | <p>C,-1.4429136454,4.0221654453,2.3204717597<br/> H,-0.7313510627,4.7750827483,1.9906171417<br/> C,-1.7716930102,2.9337420137,1.5073607245<br/> C,-0.1595808036,1.122275299,-0.2105830244<br/> C,4.9050530794,2.743592082,1.1298322624<br/> H,4.7114662462,3.8138972722,1.1846993381<br/> C,-2.6907643819,1.9289950183,1.8973068299<br/> C,4.3781280745,0.5366322903,0.2607835149<br/> C,5.4023422134,0.0091773606,1.050578755<br/> H,5.6070672287,-1.0568935178,1.0500193767<br/> C,5.9436250245,2.2129595111,1.8951758406<br/> Al,2.4009651966,2.4912608127,-0.3860122847<br/> C,-2.0431038888,4.1298099622,3.5737427713<br/> H,-1.7985793739,4.9679967115,4.2186382177<br/> C,-2.9515046581,3.1604660901,3.9924245421<br/> C,-3.2647738554,2.0792601774,3.1646100771<br/> H,-3.975378889,1.3382251582,3.5239286455<br/> C,6.1777805193,0.8429570602,1.8604396069<br/> H,6.9670887411,0.4098243487,2.4682741729<br/> C,0.4899945132,-5.2263101094,1.9760632547<br/> H,1.5242813465,-5.5464163298,2.0925465094<br/> H,-3.1975917089,-4.1064292084,1.6812581965<br/> H,-2.5649375407,-5.8142304546,3.3295940733<br/> O,-3.3091980306,1.6353002969,-0.9541198023<br/> C,-2.4394039887,2.5304531758,-1.3467207174<br/> O,-2.4606398501,3.1510917518,-2.3783115547<br/> O,-0.0251851367,-0.3537840414,-3.3047057908<br/> C,-1.1709127547,-0.4139862642,-3.1922092641<br/> O,-2.3393598837,-0.469787223,-3.109878115<br/> H,1.8703875893,7.4889835891,-1.3192353945<br/> H,6.5543750298,2.8601546727,2.5172563715<br/> H,5.9844886345,-5.6238333943,-0.4267950014<br/> H,-0.201915085,-6.5583378053,3.5266767316<br/> H,-7.3349372356,-1.9820087465,-0.0689414824<br/> H,-3.4184770672,3.2462225191,4.9693545017<br/> Na,-4.3717361878,0.0558915227,-2.1930302132</p> |
| 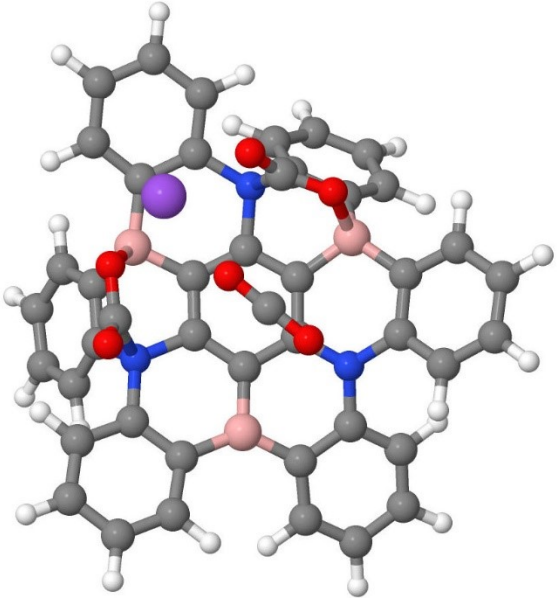 | <p><b>2CO<sub>2</sub>-B<sub>3</sub>N<sub>3</sub>-NG-Na:CO<sub>2</sub></b><br/> <b>E=-2580.85636171H; FreqIm=0</b><br/> C,5.8841381673,0.2406592424,2.2148771025<br/> C,3.6126790264,-0.9091146184,1.0031927804<br/> C,3.8061869969,0.5032959939,0.9413958532<br/> C,4.5384005971,-1.7065455659,1.702756011<br/> C,5.6546435237,-1.1397985234,2.2896969956<br/> N,0.0543892538,2.7773202866,-0.1183015885<br/> N,2.4626377592,-1.5237753304,0.4504482989<br/> C,1.3566486172,0.6377847942,0.2829031985<br/> C,2.5910129144,2.8942672702,0.0065178316<br/> C,0.1455273175,1.300639964,0.1507895107<br/> C,3.6761052489,-3.4193367373,-0.5019678608<br/> H,4.5641883762,-2.798436458,-0.5385669043<br/> C,2.4677874175,-2.8938768151,-0.0232624722<br/> C,1.3014449048,-0.7792165284,0.3407387502<br/> C,3.7295851851,3.6934278847,-0.2137613973<br/> H,4.7095886381,3.240986764,-0.1049764918<br/> C,1.2863833335,-3.6697724386,-0.1042235979<br/> C,1.3490214142,3.5131963324,-0.2215688695<br/> C,1.2416212503,4.8451671542,-0.6141411304<br/> H,0.2664541037,5.2902004729,-0.7895851687<br/> C,3.6427875671,5.0233398761,-0.6018904756<br/> C,3.7482784028,-4.730335302,-0.9552573222<br/> H,4.6975504789,-5.1127169172,-1.3181632867<br/> C,2.6126100912,-5.5390793622,-0.9620203683<br/> C,1.4010551236,-4.9907594888,-0.5614644901</p>                                                                                                                                                                                                                                                                                                                                                                                                                        |

|  |                                                                                                                                                                                                                                                                                                                                                                                                                                                                                                                                                                                                                                                                                                                                                                                                                                                                                                                                                                                                                                                                                                                                                                                                                                                                                                                                                                                                                                                                                                                                                                                                                                                                                                                                                                                                                                                                                                                                                                                                                                                                                                                                                                                                                                                                                                                                                                                                                                                                                                                                                                                                                                                                                                                                                                                                                    |
|--|--------------------------------------------------------------------------------------------------------------------------------------------------------------------------------------------------------------------------------------------------------------------------------------------------------------------------------------------------------------------------------------------------------------------------------------------------------------------------------------------------------------------------------------------------------------------------------------------------------------------------------------------------------------------------------------------------------------------------------------------------------------------------------------------------------------------------------------------------------------------------------------------------------------------------------------------------------------------------------------------------------------------------------------------------------------------------------------------------------------------------------------------------------------------------------------------------------------------------------------------------------------------------------------------------------------------------------------------------------------------------------------------------------------------------------------------------------------------------------------------------------------------------------------------------------------------------------------------------------------------------------------------------------------------------------------------------------------------------------------------------------------------------------------------------------------------------------------------------------------------------------------------------------------------------------------------------------------------------------------------------------------------------------------------------------------------------------------------------------------------------------------------------------------------------------------------------------------------------------------------------------------------------------------------------------------------------------------------------------------------------------------------------------------------------------------------------------------------------------------------------------------------------------------------------------------------------------------------------------------------------------------------------------------------------------------------------------------------------------------------------------------------------------------------------------------------|
|  | <p> H,0.4944599882,-5.5893634724,-0.6280527517<br/> C,2.3896029948,5.6052234852,-0.7922890304<br/> H,2.3026926618,6.6424018916,-1.0993418577<br/> C,0.0758374177,-1.4390511966,0.2211681696<br/> C,-5.9623042858,0.5141925275,-1.0858541281<br/> C,-3.5550351001,-0.6992703065,-0.3892968876<br/> C,-3.6007635519,0.7062508692,-0.4494104662<br/> C,-4.8376088026,1.2799177186,-0.8033489537<br/> H,-4.9012007684,2.3653686499,-0.8524915622<br/> C,-4.6710523572,-1.4826006294,-0.6954276085<br/> H,-4.5967590708,-2.5664818321,-0.6788604841<br/> C,-5.8735355918,-0.8784607908,-1.0334370404<br/> H,-6.7357343037,-1.4953757994,-1.2652388531<br/> N,-2.3054944515,-1.4755615335,-0.1200807897<br/> C,-1.0906309684,0.6949223344,0.1138934024<br/> C,-2.2192890322,2.8337329802,0.8376113585<br/> C,-3.4970620278,-2.5595195501,1.8469782866<br/> H,-4.318150462,-1.8557065597,1.7797541591<br/> C,-2.4175994126,-2.5267341034,0.975898123<br/> C,-1.064533172,-0.6763402082,0.1329729299<br/> C,-3.1519462628,3.3258995059,1.7480327523<br/> H,-4.1574315934,2.9119732512,1.7566491966<br/> C,-1.3114620865,-3.3775906499,1.0841918971<br/> C,-0.9338283053,3.3861114954,0.873330699<br/> C,-0.5426117634,4.3539695576,1.7857967604<br/> H,0.4704019755,4.736273379,1.8231420834<br/> C,-2.8023585529,4.3231667864,2.6606792883<br/> C,-3.4929283308,-3.5333477435,2.8483213584<br/> H,-4.3258724268,-3.579843237,3.5423579664<br/> C,-2.4314166675,-4.4269978143,2.963405558<br/> C,-1.3438188616,-4.3390910621,2.0928062859<br/> H,-0.4975207179,-5.0120338317,2.2056956224<br/> C,-1.5038266811,4.8235551306,2.6846399997<br/> H,-1.2222869271,5.5805349749,3.4093478166<br/> C,4.9606892633,1.0339600283,1.5645081074<br/> H,5.0991080729,2.1104956103,1.5722952037<br/> H,4.3580770098,-2.7693685875,1.8138155972<br/> H,6.3418548918,-1.7761456133,2.83942774<br/> O,0.0078769311,3.1630859078,-2.5095142168<br/> C,-0.6399675104,2.7764366632,-1.592936703<br/> O,-1.8307551711,2.2813979868,-1.5715675947<br/> O,-0.9502678834,-3.0391546657,-1.363208932<br/> C,-1.8549070134,-2.1961157102,-1.5266346733<br/> O,-2.3923915376,-1.7491292748,-2.5131695489<br/> O,2.138829764,-0.8846290334,-2.6584593689<br/> C,1.0781009063,-0.4389354506,-2.749466702<br/> O,0.0051825451,0.019320885,-2.8605938361<br/> H,-6.9000716884,0.9927783305,-1.3507055593<br/> H,-3.5386028564,4.6978312426,3.3649778665<br/> H,4.5450174329,5.6038087684,-0.7662617209<br/> H,6.7539640569,0.6800324717,2.6919044262<br/> H,2.6684576004,-6.5660645153,-1.3087680133<br/> H,-2.4426429428,-5.1803161253,3.7450833569<br/> B,2.676715197,1.3807381584,0.3903436275<br/> B,-2.3182740342,1.6151356738,-0.1862308512<br/> B,-0.1243865557,-2.9932186355,0.0872861888<br/> Na,-2.3184206896,0.4677897175,-2.9991336021 </p> |
|--|--------------------------------------------------------------------------------------------------------------------------------------------------------------------------------------------------------------------------------------------------------------------------------------------------------------------------------------------------------------------------------------------------------------------------------------------------------------------------------------------------------------------------------------------------------------------------------------------------------------------------------------------------------------------------------------------------------------------------------------------------------------------------------------------------------------------------------------------------------------------------------------------------------------------------------------------------------------------------------------------------------------------------------------------------------------------------------------------------------------------------------------------------------------------------------------------------------------------------------------------------------------------------------------------------------------------------------------------------------------------------------------------------------------------------------------------------------------------------------------------------------------------------------------------------------------------------------------------------------------------------------------------------------------------------------------------------------------------------------------------------------------------------------------------------------------------------------------------------------------------------------------------------------------------------------------------------------------------------------------------------------------------------------------------------------------------------------------------------------------------------------------------------------------------------------------------------------------------------------------------------------------------------------------------------------------------------------------------------------------------------------------------------------------------------------------------------------------------------------------------------------------------------------------------------------------------------------------------------------------------------------------------------------------------------------------------------------------------------------------------------------------------------------------------------------------------|

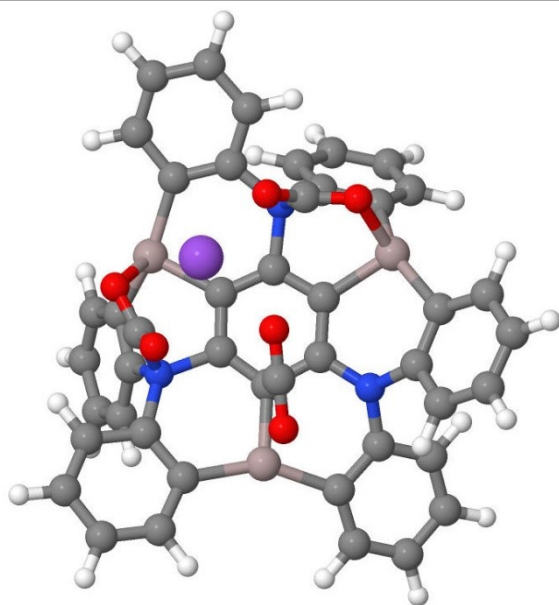

**2CO<sub>2</sub>-Al<sub>3</sub>N<sub>3</sub>-NG-Na:CO<sub>2</sub>**

**E=-3233.47075306H; FreqIm=0**

C,5.6159087141,-1.8078793248,2.6251105044  
 C,3.1932253639,-1.8670521434,1.1926411003  
 C,4.0309424942,-0.7265760728,1.1056120223  
 C,3.5722055523,-2.941311178,2.0131511314  
 C,4.7672019676,-2.9131221742,2.7169823676  
 C,1.3325445942,0.3221367781,0.3339834395  
 C,3.1738418266,2.6377650235,-0.2583926705  
 C,0.307847485,1.2245770926,0.1736107294  
 C,3.0263839998,-3.7584852535,-0.8673771627  
 H,3.9096698014,-3.1262330481,-0.8415518649  
 C,1.8489360322,-3.325346623,-0.2314706798  
 C,0.9616045941,-1.0515479362,0.3820256577  
 C,4.3297222393,3.3775762243,-0.5853511162  
 H,5.3043523948,2.9150738699,-0.4469614536  
 C,0.6841709658,-4.1342744782,-0.2876323972  
 C,1.9494810776,3.2871231981,-0.4570279587  
 C,1.8753478777,4.5882518428,-0.960186107  
 H,0.9097223041,5.075752435,-1.083837081  
 C,4.2771886123,4.6730380327,-1.0823526217  
 C,3.0882398384,-4.9886215768,-1.5079835589  
 H,4.0145201983,-5.2952400898,-1.9850277405  
 C,1.9675157536,-5.816546258,-1.5407327044  
 C,0.7902500364,-5.3713677535,-0.9514578233  
 H,-0.0883321229,-6.0106741145,-1.0120627998  
 C,3.0357733125,5.2791582563,-1.276380204  
 H,2.9680741616,6.2893581205,-1.6671240315  
 C,-0.3761335633,-1.4361608503,0.2472471653  
 C,-6.2517906772,1.263190425,-1.2718459165  
 C,-3.8891354658,-0.025630385,-0.5416649964  
 C,-3.9246659971,1.3772735671,-0.4730762898  
 C,-5.1438440261,1.9841293952,-0.8487058639  
 H,-5.2215530335,3.0685040296,-0.8076687622  
 C,-4.9949270817,-0.7648163875,-0.9758221214  
 H,-4.9448064888,-1.8515925403,-1.0077116738  
 C,-6.1699446957,-0.1277027878,-1.3417123237  
 H,-7.0180335791,-0.7174055113,-1.6746483749  
 C,-1.0514172216,0.9245026595,0.0917699833  
 C,-1.4382825781,3.6215772972,1.1911269721  
 C,-4.1560607037,-1.2761649922,1.8868827848  
 H,-4.6035697048,-0.3071554268,1.7008904759  
 C,-3.1856855917,-1.8155031405,1.0426641293  
 C,-1.3162799365,-0.4247343734,0.1193670082  
 C,-1.9023793251,4.3751063711,2.2757547133  
 H,-2.9729185119,4.4466690632,2.4499970378  
 C,-2.5621502364,-3.0478275822,1.3028190841  
 C,-0.0456287766,3.5718561241,1.009829353  
 C,0.8444829316,4.1830700814,1.8912148894  
 H,1.9179916857,4.1136388428,1.7634994024  
 C,-1.0358064291,5.0235499709,3.153344678  
 C,-4.5658571148,-2.0064741225,3.0005937758  
 H,-5.3222709272,-1.5885061919,3.6572616792  
 C,-4.0129818202,-3.2555560568,3.2621745209  
 C,-3.0173137451,-3.7528855349,2.4239675979  
 H,-2.5682059456,-4.7144631606,2.659391285  
 C,0.3374731032,4.910090381,2.9668136178  
 H,1.0289763821,5.3875411372,3.653625211  
 C,5.2331819299,-0.7302728243,1.8385002407  
 H,5.8876289279,0.1374225068,1.7887954202  
 H,2.9211615934,-3.807899433,2.0830127103  
 H,5.0342730217,-3.7563873522,3.3469359328  
 O,0.4833287283,2.324521313,-2.4598569006

|                                                                                    |                                                                                                                                                                                                                                                                                                                                                                                                                                                                                                                                                                                                                                                                                                                                                                                                                                                                                                                                                                                                                                                                                                                                                                                                                                                                                                                                                                                                                                                                                                                                                                                                                                                                                                                                                                                                                                                                                                                                                                                                                                                                         |
|------------------------------------------------------------------------------------|-------------------------------------------------------------------------------------------------------------------------------------------------------------------------------------------------------------------------------------------------------------------------------------------------------------------------------------------------------------------------------------------------------------------------------------------------------------------------------------------------------------------------------------------------------------------------------------------------------------------------------------------------------------------------------------------------------------------------------------------------------------------------------------------------------------------------------------------------------------------------------------------------------------------------------------------------------------------------------------------------------------------------------------------------------------------------------------------------------------------------------------------------------------------------------------------------------------------------------------------------------------------------------------------------------------------------------------------------------------------------------------------------------------------------------------------------------------------------------------------------------------------------------------------------------------------------------------------------------------------------------------------------------------------------------------------------------------------------------------------------------------------------------------------------------------------------------------------------------------------------------------------------------------------------------------------------------------------------------------------------------------------------------------------------------------------------|
|                                                                                    | <p>C,-0.1736759712,2.7671229474,-1.5424912761<br/> O,-1.3904452959,3.1142306738,-1.5415383749<br/> O,-2.0826541528,-2.9286109574,-1.4172572179<br/> C,-2.3999485128,-1.7313070656,-1.546021275<br/> O,-2.4311468404,-1.000203318,-2.5119726475<br/> O,3.0335221201,-0.2020961788,-2.104833328<br/> C,1.9483111504,-0.3835883473,-2.4855994799<br/> O,0.8733248327,-0.5711331255,-2.8872474889<br/> H,2.0079294945,-6.7834791013,-2.0325079851<br/> H,6.5536515607,-1.786548362,3.1712283104<br/> H,5.1914836346,5.2073234774,-1.3205274485<br/> H,-1.4287566644,5.5989288701,3.985908234<br/> H,-7.1684367821,1.7748600738,-1.5481382212<br/> H,-4.3411188755,-3.8291526569,4.123711115<br/> Al,3.175894888,0.7787736511,0.2903673337<br/> Al,-2.3147494122,2.3857410784,-0.0367193419<br/> Al,-1.0050978233,-3.2755794149,0.1358559354<br/> N,1.9664952491,-2.0459020204,0.4499878936<br/> N,-2.7406273607,-0.9476150181,-0.1547532741<br/> N,0.5673651116,2.7342722882,-0.1350299473<br/> Na,-1.1580345523,0.7259391458,-3.0969209381</p>                                                                                                                                                                                                                                                                                                                                                                                                                                                                                                                                                                                                                                                                                                                                                                                                                                                                                                                                                                                                                             |
| 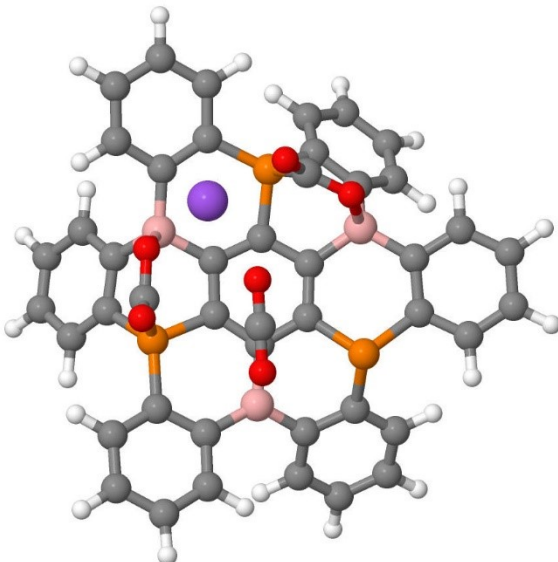 | <p><b>2CO<sub>2</sub>-B<sub>3</sub>P<sub>3</sub>-NG-Na:CO<sub>2</sub></b><br/> <b>E=-3440.61499017H; FreqIm=0</b><br/> C,-1.3253460122,5.7747248876,-2.3780500748<br/> C,-1.9769242882,3.6431698532,-0.6698492346<br/> C,-0.6058391082,3.9795325496,-0.8794419699<br/> C,-2.9812273114,4.384470855,-1.2896703773<br/> C,-2.656557482,5.4367578686,-2.1469061112<br/> P,2.8978421568,0.947318922,-0.0638590791<br/> P,-2.3257332046,2.3292006638,0.5740869164<br/> C,0.185874472,1.5541575668,-0.2198950161<br/> C,2.0108353881,3.5637684988,-0.0198092716<br/> C,1.177311669,0.5791382844,-0.3280669076<br/> C,-5.0781976673,2.3747345255,0.6086598512<br/> H,-4.946119764,3.4497471855,0.7106334743<br/> C,-3.9661148855,1.5448672269,0.3912057276<br/> C,-1.1481428651,1.1045754597,-0.0535685819<br/> C,2.2457608838,4.9188242524,0.2577018229<br/> H,1.4121910521,5.6135186245,0.2148838825<br/> C,-4.1156401381,0.1375426222,0.3661763727<br/> C,3.1372213655,2.7043585008,0.1161055233<br/> C,4.4040701439,3.1702034942,0.4731946822<br/> H,5.2375111638,2.4794561314,0.5815712539<br/> C,3.5067519523,5.3972626868,0.6176385658<br/> B,0.5395032219,3.0741548722,-0.3423171162<br/> C,-6.3529836012,1.8399828185,0.7505894707<br/> H,-7.2030919357,2.4978484653,0.9043495478<br/> C,-6.5208086383,0.4564419312,0.7388947098<br/> C,-5.413326757,-0.3657651065,0.5604067886<br/> H,-5.553940566,-1.4451428078,0.578282827<br/> C,4.5905461825,4.5294766156,0.7157195269<br/> H,5.5707211212,4.900426033,0.9971858066<br/> B,-2.9266015934,-0.9102245372,0.1461252197<br/> C,-1.4634502514,-0.2537485787,-0.1250013946<br/> C,2.6731240545,-5.6078516857,0.6160838085<br/> C,0.5454518525,-3.9077084612,0.1193424891<br/> C,1.8465921932,-3.3468340804,0.1418793947<br/> C,2.8916528289,-4.2466047194,0.4130357309<br/> H,3.9084790848,-3.8615812391,0.4594017374<br/> C,0.3103442679,-5.2752371823,0.3287110712<br/> H,-0.7051225848,-5.6660916064,0.3225506934<br/> C,1.3797106526,-6.1296094285,0.5655147019<br/> H,1.2054129996,-7.1890924967,0.7228275142</p> |

|                                                                                     |                                                                                                                                                                                                                                                                                                                                                                                                                                                                                                                                                                                                                                                                                                                                                                                                                                                                                                                                                                                                                                                                                                                                                                                                                                                                                                                                                                                                                                                                                                                                                                                                                                                                                                                                                                                                                                                                                                                                                                                                                                                                                |
|-------------------------------------------------------------------------------------|--------------------------------------------------------------------------------------------------------------------------------------------------------------------------------------------------------------------------------------------------------------------------------------------------------------------------------------------------------------------------------------------------------------------------------------------------------------------------------------------------------------------------------------------------------------------------------------------------------------------------------------------------------------------------------------------------------------------------------------------------------------------------------------------------------------------------------------------------------------------------------------------------------------------------------------------------------------------------------------------------------------------------------------------------------------------------------------------------------------------------------------------------------------------------------------------------------------------------------------------------------------------------------------------------------------------------------------------------------------------------------------------------------------------------------------------------------------------------------------------------------------------------------------------------------------------------------------------------------------------------------------------------------------------------------------------------------------------------------------------------------------------------------------------------------------------------------------------------------------------------------------------------------------------------------------------------------------------------------------------------------------------------------------------------------------------------------|
|                                                                                     | <p>P,-0.88121897,-2.8374367199,-0.0179955167<br/> C,0.950709328,-0.8014869381,-0.3217838345<br/> C,3.4006827944,-1.4249650001,-1.1256269339<br/> C,-2.3782843194,-4.1902547287,-2.0065786489<br/> H,-1.6160528055,-4.9624616585,-2.073539634<br/> C,-2.2673127688,-3.1410886846,-1.0948482854<br/> C,-0.3886493417,-1.1453337451,-0.291787547<br/> C,4.0116558215,-2.3066730019,-2.0207257751<br/> H,3.7060491413,-3.3499244749,-2.0379293857<br/> C,-3.2031281189,-2.0910388854,-0.960092228<br/> C,3.8365401675,-0.081031035,-1.192876919<br/> C,4.8256032029,0.3757083016,-2.0607968568<br/> H,5.1181615898,1.4226561623,-2.0775610403<br/> C,5.0061284905,-1.8749758778,-2.9028003563<br/> B,2.2103872387,-1.7844910242,-0.0733405667<br/> C,-3.4862342011,-4.208605249,-2.8480019538<br/> H,-3.6080481654,-5.0100773697,-3.5694817561<br/> C,-4.4255789387,-3.1795030788,-2.7695849276<br/> C,-4.2842299209,-2.1400432129,-1.8481629643<br/> H,-5.0278835958,-1.3485755834,-1.8238477638<br/> C,5.4193850359,-0.5436618077,-2.9232456065<br/> H,6.1914019723,-0.2195453908,-3.6135302056<br/> C,-0.3188999249,5.0520904736,-1.7453574844<br/> H,0.7180980799,5.3020962196,-1.9568749093<br/> H,-4.0249462008,4.1240785098,-1.1442427576<br/> H,-3.4514005007,5.9841958109,-2.6452640145<br/> O,3.273830791,0.4928099801,2.6169631408<br/> C,3.038472108,-0.0283871985,1.5562284034<br/> O,2.7253563739,-1.2914458962,1.371977625<br/> O,-2.6707108581,-1.6949625927,1.5581832471<br/> C,-1.6403696487,-2.4365658889,1.6688953135<br/> O,-1.0402419939,-2.7777170115,2.6824454953<br/> O,0.5645203917,2.4000734538,2.8374246492<br/> C,0.4037307524,1.2560313466,2.8398280045<br/> O,0.2460616694,0.0956710424,2.8398479354<br/> H,3.5137742504,-6.2658951531,0.8158800402<br/> H,5.462448743,-2.5868275906,-3.5843394051<br/> H,3.6394324979,6.4537318819,0.8300186403<br/> H,-1.0746286689,6.5882600709,-3.0513484967<br/> H,-7.5055724716,0.0228270829,0.8858556924<br/> H,-5.2803152481,-3.1853568121,-3.4397479307<br/> Na,1.1129551691,-2.0947791923,2.922301541</p> |
| 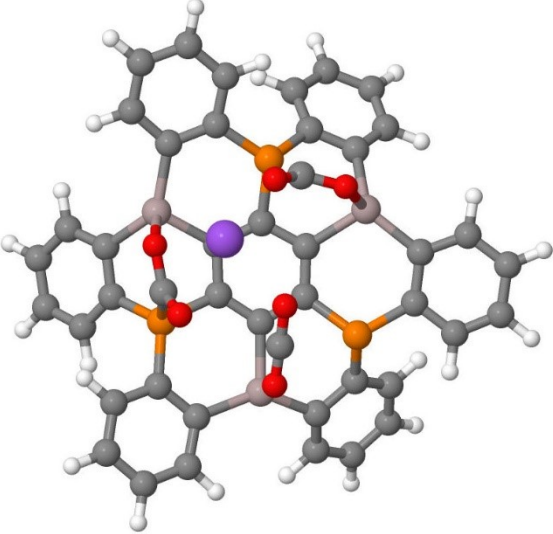 | <p><b>2CO<sub>2</sub>-Al<sub>3</sub>P<sub>3</sub>-NG-Na:CO<sub>2</sub></b><br/> <b>E=-4093.29532338H; FreqIm=0</b><br/> C,-1.9708713189,5.9975552484,-2.3365817311<br/> C,-2.2177942933,3.7144879199,-0.7226897174<br/> C,-0.9844341885,4.4199695166,-0.7568939956<br/> C,-3.2881642421,4.1438671317,-1.5085793348<br/> C,-3.1632772343,5.2819721777,-2.3089195676<br/> P,2.9137642837,0.9387006175,-0.1126852016<br/> P,-2.3430183268,2.3128073721,0.4931635255<br/> C,0.1686495327,1.5123866752,-0.3012136797<br/> C,2.4681576423,3.7337432733,0.1236458375<br/> C,1.1644944908,0.5540419194,-0.4883912796<br/> C,-5.0157072216,2.7646250897,0.7773267396<br/> H,-4.6779737959,3.7953997515,0.8665207298<br/> C,-4.0936811726,1.7387877221,0.50368304<br/> C,-1.1752250774,1.047285104,-0.2169440357<br/> C,2.9918368971,5.0099026286,0.3854182722<br/> H,2.3382936874,5.877922601,0.3257380303<br/> C,-4.524492792,0.3909367235,0.4719199951<br/> C,3.3738433322,2.6522152194,0.2210450839<br/> C,4.7135894196,2.8363018194,0.5943764157</p>                                                                                                                                                                                                                                                                                                                                                                                                                                                                                                                                                                                                                                                                                                                                                                                                                                                                                                                                                                                                                                |

|  |                                                                                                                                                                                                                                                                                                                                                                                                                                                                                                                                                                                                                                                                                                                                                                                                                                                                                                                                                                                                                                                                                                                                                                                                                                                                                                                                                                                                                                                                                                                                                                                                                                                                                                                                                                                                                                                                                                                                                                                                                                                                                                                                                                                                                                                                                                                                                                                                                                                                                                                                                                                                                                                                                                                                                                                                                                                                                                                                                                                                                                                                                                       |
|--|-------------------------------------------------------------------------------------------------------------------------------------------------------------------------------------------------------------------------------------------------------------------------------------------------------------------------------------------------------------------------------------------------------------------------------------------------------------------------------------------------------------------------------------------------------------------------------------------------------------------------------------------------------------------------------------------------------------------------------------------------------------------------------------------------------------------------------------------------------------------------------------------------------------------------------------------------------------------------------------------------------------------------------------------------------------------------------------------------------------------------------------------------------------------------------------------------------------------------------------------------------------------------------------------------------------------------------------------------------------------------------------------------------------------------------------------------------------------------------------------------------------------------------------------------------------------------------------------------------------------------------------------------------------------------------------------------------------------------------------------------------------------------------------------------------------------------------------------------------------------------------------------------------------------------------------------------------------------------------------------------------------------------------------------------------------------------------------------------------------------------------------------------------------------------------------------------------------------------------------------------------------------------------------------------------------------------------------------------------------------------------------------------------------------------------------------------------------------------------------------------------------------------------------------------------------------------------------------------------------------------------------------------------------------------------------------------------------------------------------------------------------------------------------------------------------------------------------------------------------------------------------------------------------------------------------------------------------------------------------------------------------------------------------------------------------------------------------------------------|
|  | <p> H,5.3903979541,1.9881885403,0.6786838003<br/> C,4.3258255698,5.2077185864,0.7394498481<br/> Al,0.5480742659,3.4264219394,-0.1175424497<br/> C,-6.3672072946,2.4852959074,0.9455831325<br/> H,-7.0634371981,3.2950486697,1.1433319462<br/> C,-6.8178577831,1.1683796467,0.874574488<br/> C,-5.8987376478,0.1473158604,0.6536607158<br/> H,-6.2647164077,-0.878590631,0.6318613756<br/> C,5.1863886687,4.1176458606,0.8561209994<br/> H,6.2216662755,4.2616779773,1.1483419323<br/> Al,-3.2685889799,-1.068439875,0.1980050792<br/> C,-1.4841395479,-0.3153562457,-0.2923445764<br/> C,2.2211873033,-6.2860097032,0.3940649625<br/> C,0.432898717,-4.1852558341,0.0556836962<br/> C,1.8151099464,-3.9085753256,-0.0528582632<br/> C,2.6831486577,-5.0005074871,0.1173946929<br/> H,3.7578432199,-4.845027382,0.0396992585<br/> C,-0.0432047009,-5.4711269751,0.3570251384<br/> H,-1.1097397977,-5.6589835612,0.4619901643<br/> C,0.8536263459,-6.5203685615,0.5246686992<br/> H,0.4839676981,-7.5141188049,0.7569181741<br/> P,-0.8641485679,-2.929661111,-0.080437092<br/> C,0.9460821544,-0.8421802949,-0.5694896614<br/> C,3.956718003,-1.3048190515,-1.3461519327<br/> C,-2.17788359,-4.5564067981,-1.937740814<br/> H,-1.256465754,-5.1264038622,-2.0209859409<br/> C,-2.2813535007,-3.4614153601,-1.0714574182<br/> C,-0.394035924,-1.201862892,-0.4743252638<br/> C,4.8329844481,-1.9226812467,-2.2468403877<br/> H,4.7999331303,-3.002808286,-2.3715716514<br/> C,-3.4482474983,-2.6705343791,-0.9604969882<br/> C,4.0571824803,0.1040232962,-1.2455871556<br/> C,4.9579179848,0.8569512199,-2.0077194006<br/> H,4.9976920782,1.93970844,-1.9269595749<br/> C,5.7507083597,-1.1912166968,-3.0028262204<br/> Al,2.4761709128,-2.0801298284,-0.2959410868<br/> C,-3.2815293064,-4.9049430099,-2.7106902227<br/> H,-3.2201789889,-5.7512704838,-3.3876574593<br/> C,-4.4572273813,-4.1610145912,-2.6162513416<br/> C,-4.5299115114,-3.0598978153,-1.7620086683<br/> H,-5.4539761497,-2.486763493,-1.7275181154<br/> C,5.8090097065,0.1964594357,-2.8898611044<br/> H,6.5121485985,0.7669520475,-3.4883705077<br/> C,-0.8863991593,5.5505558733,-1.5802096566<br/> H,0.0512979078,6.1011122698,-1.6381315913<br/> H,-4.2248667821,3.594370758,-1.5109577964<br/> H,-4.0052164942,5.6031498948,-2.9154600888<br/> O,2.6664847766,0.5716654251,2.5622775481<br/> C,2.8829688252,-0.0302343207,1.5224448588<br/> O,2.8644392613,-1.3205641596,1.409004341<br/> O,-2.5894718968,-1.9354422848,1.7592332487<br/> C,-1.4383379153,-2.4657121019,1.6830310091<br/> O,-0.5913098803,-2.5767128597,2.5654013033<br/> O,0.4194722627,3.0044612078,2.3750130617<br/> C,0.116146903,1.9234518027,2.6902782504<br/> O,-0.1671664246,0.8445143463,3.0158428239<br/> H,2.9262001158,-7.1027557918,0.5180167066<br/> H,6.4176870501,-1.7043304751,-3.6895137405<br/> H,4.6921275549,6.2107963812,0.9366797043<br/> H,-1.8799704851,6.8880022384,-2.9512956569<br/> H,-7.8711205288,0.940758917,1.009371636<br/> H,-5.3175502285,-4.4360583248,-3.2197757811<br/> Na,1.1359195665,-1.292066148,3.1562458866 </p> |
|--|-------------------------------------------------------------------------------------------------------------------------------------------------------------------------------------------------------------------------------------------------------------------------------------------------------------------------------------------------------------------------------------------------------------------------------------------------------------------------------------------------------------------------------------------------------------------------------------------------------------------------------------------------------------------------------------------------------------------------------------------------------------------------------------------------------------------------------------------------------------------------------------------------------------------------------------------------------------------------------------------------------------------------------------------------------------------------------------------------------------------------------------------------------------------------------------------------------------------------------------------------------------------------------------------------------------------------------------------------------------------------------------------------------------------------------------------------------------------------------------------------------------------------------------------------------------------------------------------------------------------------------------------------------------------------------------------------------------------------------------------------------------------------------------------------------------------------------------------------------------------------------------------------------------------------------------------------------------------------------------------------------------------------------------------------------------------------------------------------------------------------------------------------------------------------------------------------------------------------------------------------------------------------------------------------------------------------------------------------------------------------------------------------------------------------------------------------------------------------------------------------------------------------------------------------------------------------------------------------------------------------------------------------------------------------------------------------------------------------------------------------------------------------------------------------------------------------------------------------------------------------------------------------------------------------------------------------------------------------------------------------------------------------------------------------------------------------------------------------------|





**Table S7:** Geometries, energies (in Hartree) and Cartesian coordinates (in Å) of the transition states with a Na<sup>+</sup> cation in vacuum. Level of theory: M06-2X/6-311++G\*//M06-2X/6-31+G\*

|  |                                                                                                                                                                                                                                                                                                                                                                                                                                                                                                                                                                                                                                                                                                                                                                                                                                                                                                                                                                                                                                                                                                                                                                                                                                                                                                                                                                                                                                                                                                                                                                                                                                                                                                                                                                                                                                                                                                                                                                                                                                                                                                                                                                                                                                                                                                                                                                                                                                                                                                                                                                                                                                                                                                                                                                                                                                                                                                      |
|--|------------------------------------------------------------------------------------------------------------------------------------------------------------------------------------------------------------------------------------------------------------------------------------------------------------------------------------------------------------------------------------------------------------------------------------------------------------------------------------------------------------------------------------------------------------------------------------------------------------------------------------------------------------------------------------------------------------------------------------------------------------------------------------------------------------------------------------------------------------------------------------------------------------------------------------------------------------------------------------------------------------------------------------------------------------------------------------------------------------------------------------------------------------------------------------------------------------------------------------------------------------------------------------------------------------------------------------------------------------------------------------------------------------------------------------------------------------------------------------------------------------------------------------------------------------------------------------------------------------------------------------------------------------------------------------------------------------------------------------------------------------------------------------------------------------------------------------------------------------------------------------------------------------------------------------------------------------------------------------------------------------------------------------------------------------------------------------------------------------------------------------------------------------------------------------------------------------------------------------------------------------------------------------------------------------------------------------------------------------------------------------------------------------------------------------------------------------------------------------------------------------------------------------------------------------------------------------------------------------------------------------------------------------------------------------------------------------------------------------------------------------------------------------------------------------------------------------------------------------------------------------------------------|
|  | <p><b>B<sub>3</sub>N<sub>3</sub>-NG-Na/CO<sub>2</sub></b><br/> <b>E=-2203.83031345H; FreqIm=1</b></p> <p>C,1.1657673404,-5.8625599535,-1.7197350025<br/> C,1.7936702224,-3.3693659168,-0.5868886332<br/> C,0.4527823505,-3.825213148,-0.56956038<br/> C,2.7890906092,-4.1415443406,-1.2048972888<br/> C,2.475889509,-5.3747155609,-1.7553316422<br/> N,-2.5055373499,-0.5467863963,0.0722377956<br/> N,2.1487897489,-2.0883528872,-0.0604797015<br/> C,-0.1604303846,-1.3920826655,-0.1089312266<br/> C,-2.1320515708,-3.0453776915,0.2287615554<br/> C,-1.0404694155,-0.3348990506,-0.1193252339<br/> C,4.1238121907,-2.9329443026,1.0962576944<br/> H,3.6571377538,-3.909511718,1.1593434254<br/> C,3.4516692006,-1.8641550709,0.4795498207<br/> C,1.2271939664,-1.0581250348,-0.0912330203<br/> C,-2.6772416244,-4.2893835584,0.5983623481<br/> H,-2.0390088806,-5.1670787774,0.5718024756<br/> C,4.024119644,-0.5712795738,0.4783587395<br/> C,-2.975414704,-1.9338852559,0.3435017305<br/> C,-4.2885105786,-2.038089011,0.8014591466<br/> H,-4.9132564688,-1.1521842887,0.8866183379<br/> C,-3.9869525061,-4.4192141519,1.0405148086<br/> B,-0.6341056616,-2.8337489687,-0.1309345834<br/> C,5.3737900081,-2.7366582071,1.660132142<br/> H,5.8722995686,-3.5715533147,2.1434384363<br/> C,5.9775806969,-1.4744512933,1.6389415194<br/> C,5.295531472,-0.4143697419,1.0680125677<br/> H,5.7299764893,0.5805195364,1.1089047572<br/> C,-4.796082026,-3.2866905542,1.1395921555<br/> H,-5.8188716963,-3.3701531316,1.493222019<br/> B,3.1453800857,0.6066676278,0.0211969001<br/> C,1.6686596685,0.2790556392,-0.0605833673<br/> C,-1.6596850838,5.7013568096,0.8400476704<br/> C,0.162608475,3.6567984473,0.1769745041<br/> C,-1.2197555136,3.4872390809,-0.0928029658<br/> C,-2.1041147958,4.5356858478,0.2367899517<br/> H,-3.1636188641,4.3986056957,0.0299709762<br/> C,0.6026054433,4.8232922674,0.8260118946<br/> H,1.6493368062,4.9367375424,1.0869010878<br/> C,-0.2987732451,5.8274302226,1.148191127<br/> H,0.0631730646,6.7178783991,1.653797224<br/> N,1.1042868602,2.6384418203,-0.1476420593<br/> C,-0.6743345255,1.0103921475,-0.1856325705<br/> C,-2.9779100489,1.5376923022,-1.184289796<br/> C,2.67826501,4.2243318879,-1.1405686865<br/> H,1.8597201237,4.9080081279,-1.3347071417<br/> C,2.4416556525,2.9834418303,-0.5285925461<br/> C,0.7038243045,1.3099455995,-0.1284716498<br/> C,-3.714404795,2.2375861882,-2.1410804923<br/> H,-3.490792395,3.2877293678,-2.3126916507<br/> C,3.4964317001,2.0544204968,-0.3773163396<br/> C,-3.2764449962,0.173836492,-1.0004100176<br/> C,-4.2299044795,-0.4794137757,-1.7628086499<br/> H,-4.4300214498,-1.5370125618,-1.6440835036<br/> C,-4.698883592,1.6058380214,-2.9040679672<br/> B,-1.6944257129,2.0859292633,-0.4962712185<br/> C,3.9596655898,4.5714272633,-1.5416870332<br/> H,4.1200166428,5.531157308,-2.0236701658</p> |
|--|------------------------------------------------------------------------------------------------------------------------------------------------------------------------------------------------------------------------------------------------------------------------------------------------------------------------------------------------------------------------------------------------------------------------------------------------------------------------------------------------------------------------------------------------------------------------------------------------------------------------------------------------------------------------------------------------------------------------------------------------------------------------------------------------------------------------------------------------------------------------------------------------------------------------------------------------------------------------------------------------------------------------------------------------------------------------------------------------------------------------------------------------------------------------------------------------------------------------------------------------------------------------------------------------------------------------------------------------------------------------------------------------------------------------------------------------------------------------------------------------------------------------------------------------------------------------------------------------------------------------------------------------------------------------------------------------------------------------------------------------------------------------------------------------------------------------------------------------------------------------------------------------------------------------------------------------------------------------------------------------------------------------------------------------------------------------------------------------------------------------------------------------------------------------------------------------------------------------------------------------------------------------------------------------------------------------------------------------------------------------------------------------------------------------------------------------------------------------------------------------------------------------------------------------------------------------------------------------------------------------------------------------------------------------------------------------------------------------------------------------------------------------------------------------------------------------------------------------------------------------------------------------------|

|                                                                                    |                                                                                                                                                                                                                                                                                                                                                                                                                                                                                                                                                                                                                                                                                                                                                                                                                                                                                                                                                                                                                                                                                                                                                                                                                                                                                                                                                                                                                                                                                                                                                                                                                                                                                                                                                                                                                                                                                                                                                                                                                                                                                                                                                                        |
|------------------------------------------------------------------------------------|------------------------------------------------------------------------------------------------------------------------------------------------------------------------------------------------------------------------------------------------------------------------------------------------------------------------------------------------------------------------------------------------------------------------------------------------------------------------------------------------------------------------------------------------------------------------------------------------------------------------------------------------------------------------------------------------------------------------------------------------------------------------------------------------------------------------------------------------------------------------------------------------------------------------------------------------------------------------------------------------------------------------------------------------------------------------------------------------------------------------------------------------------------------------------------------------------------------------------------------------------------------------------------------------------------------------------------------------------------------------------------------------------------------------------------------------------------------------------------------------------------------------------------------------------------------------------------------------------------------------------------------------------------------------------------------------------------------------------------------------------------------------------------------------------------------------------------------------------------------------------------------------------------------------------------------------------------------------------------------------------------------------------------------------------------------------------------------------------------------------------------------------------------------------|
|                                                                                    | <p>C,5.0272704094,3.6874180515,-1.3633124716<br/> C,4.7808669092,2.4435840296,-0.8061549102<br/> H,5.5914725661,1.724052662,-0.7354753229<br/> C,-4.9387106134,0.2502998922,-2.7246938172<br/> H,-5.6777628086,-0.2612282139,-3.3330064838<br/> C,0.1766577382,-5.0823516404,-1.1468095929<br/> H,-0.8529587608,-5.4256961649,-1.183620677<br/> H,3.8029061491,-3.7646832689,-1.2791052556<br/> H,3.2583692193,-5.9497197783,-2.2413296631<br/> O,-3.5538784201,1.1137277879,1.5356486764<br/> C,-2.733806258,0.2064100887,1.5578657866<br/> O,-1.9837270144,-0.238637783,2.4120263959<br/> H,-4.3744179542,-5.3927989747,1.3232569888<br/> H,0.924661952,-6.8218966208,-2.1657593494<br/> H,6.9522616423,-1.3252140981,2.0922090667<br/> H,6.0255569398,3.9587336055,-1.6910471832<br/> H,-2.3536237848,6.4991719592,1.0852660597<br/> H,-5.2577674902,2.1655223984,-3.6473622795<br/> Na,-2.3051012542,1.885900739,3.2997777546</p>                                                                                                                                                                                                                                                                                                                                                                                                                                                                                                                                                                                                                                                                                                                                                                                                                                                                                                                                                                                                                                                                                                                                                                                                                                  |
| 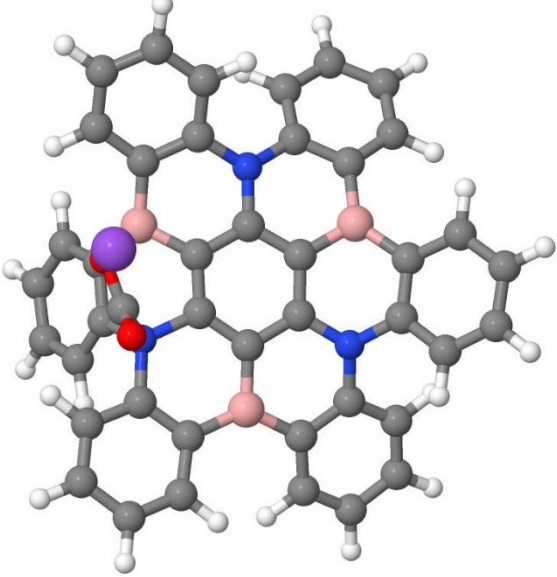 | <p><b>B<sub>3</sub>N<sub>3</sub>-NG-Na/CO<sub>2</sub> (2)</b><br/> <b>E=-2203.82404616H; FreqIm=1</b><br/> C,-0.1051516936,-6.0037083652,-1.5624771298<br/> C,1.0396998559,-3.6864657131,-0.4515831214<br/> C,-0.3708155615,-3.8415937716,-0.4445480616<br/> C,1.8483513495,-4.6707123666,-1.046824145<br/> C,1.2813705162,-5.8134216063,-1.5845786773<br/> N,-2.5880054985,0.0098121002,0.1381178801<br/> N,1.6590585691,-2.5064891577,0.0503763159<br/> C,-0.4544687607,-1.3438739584,0.0460526344<br/> C,-2.7552871505,-2.5179831242,0.2724820756<br/> C,-1.0793543333,-0.1063418629,0.0360409217<br/> C,3.4497697133,-3.7051776939,1.1953103647<br/> H,2.7896330269,-4.5580859366,1.3086669958<br/> C,2.9975118607,-2.5416225551,0.5524674331<br/> C,0.9643832608,-1.3064973011,0.0348765152<br/> C,-3.5858736284,-3.6175375802,0.5662041497<br/> H,-3.1494710949,-4.6109416987,0.5762400399<br/> C,3.8275402068,-1.3991316533,0.4849757704<br/> C,-3.3544434631,-1.2560909026,0.3481282943<br/> C,-4.6990989009,-1.0823292611,0.6684074042<br/> H,-5.1287869094,-0.0845821795,0.7171343446<br/> C,-4.928881469,-3.4689209151,0.8824385639<br/> B,-1.2254905479,-2.642163546,-0.0142122236<br/> C,4.7332402712,-3.7597491085,1.7158032046<br/> H,5.0618751879,-4.6644649286,2.2185148963<br/> C,5.5878221103,-2.6561944154,1.6249265936<br/> C,5.1233568493,-1.4947076386,1.0311348959<br/> H,5.7582900595,-0.6131019628,1.0189578238<br/> C,-5.4917478972,-2.1920574035,0.9238707953<br/> H,-6.5401088518,-2.058542849,1.1706813115<br/> B,3.1939214707,-0.0733446973,0.0197256691<br/> C,1.677994876,-0.0875991598,0.0174105725<br/> C,-0.3643287433,5.9630665535,0.8848994152<br/> C,0.9186496912,3.546201309,0.2197484412<br/> C,-0.4810327874,3.6708374989,0.049934344<br/> C,-1.0888423755,4.8956234793,0.3727117515<br/> H,-2.1641738175,4.9880694767,0.2306533317<br/> C,1.6394468991,4.6054279239,0.7929029178<br/> H,2.699900312,4.4942313772,0.9914320058<br/> C,1.0042290683,5.7975015973,1.1152095131<br/> H,1.5852428569,6.6029343035,1.554645503<br/> N,1.6162713461,2.3405791357,-0.1257344206<br/> C,-0.4513878004,1.1156241852,-0.0390779656</p> |

|                                                                                     |                                                                                                                                                                                                                                                                                                                                                                                                                                                                                                                                                                                                                                                                                                                                                                                                                                                                                                                                                                                                                                                                                                                                                                                                                                                                                                                                                                                                                                                                                                                                                                                                                                                                               |
|-------------------------------------------------------------------------------------|-------------------------------------------------------------------------------------------------------------------------------------------------------------------------------------------------------------------------------------------------------------------------------------------------------------------------------------------------------------------------------------------------------------------------------------------------------------------------------------------------------------------------------------------------------------------------------------------------------------------------------------------------------------------------------------------------------------------------------------------------------------------------------------------------------------------------------------------------------------------------------------------------------------------------------------------------------------------------------------------------------------------------------------------------------------------------------------------------------------------------------------------------------------------------------------------------------------------------------------------------------------------------------------------------------------------------------------------------------------------------------------------------------------------------------------------------------------------------------------------------------------------------------------------------------------------------------------------------------------------------------------------------------------------------------|
|                                                                                     | <p>C,-2.5074354496,2.089596953,-1.2153056535<br/> C,3.4330789037,3.5339423112,-1.243653412<br/> H,2.7689089592,4.3722969205,-1.4197799673<br/> C,2.9680795836,2.3854468712,-0.5808349613<br/> C,0.9559802042,1.1224251772,-0.0438378031<br/> C,-2.9493043427,2.8672971401,-2.2845833183<br/> H,-2.5043840703,3.8466383379,-2.4421830677<br/> C,3.8129409477,1.2569150924,-0.4473933441<br/> C,-3.0931851053,0.8272902465,-1.0456837108<br/> C,-4.0408510429,0.3156458913,-1.919175684<br/> H,-4.4534403121,-0.6789939931,-1.8058096274<br/> C,-3.9236321822,2.391736875,-3.1641874177<br/> B,-1.2919701529,2.3894774504,-0.2661713388<br/> C,4.7354483202,3.5904536729,-1.7140381244<br/> H,5.0695824946,4.4828737774,-2.2349044922<br/> C,5.6023890804,2.5045941275,-1.5543539931<br/> C,5.1284241266,1.3558201992,-0.9451916629<br/> H,5.7719378078,0.482636525,-0.8839128986<br/> C,-4.4516943483,1.1177017634,-2.9884383166<br/> H,-5.186261648,0.7276119732,-3.6854840691<br/> C,-0.9049526997,-5.0188724768,-1.0139308713<br/> H,-1.9834429414,-5.1314549002,-1.0647064528<br/> H,2.9197534705,-4.5234649282,-1.118213566<br/> H,1.9253050489,-6.5510327364,-2.0541436452<br/> O,-2.4983307717,2.0803883279,1.3670799222<br/> C,-2.7010194008,0.8536943918,1.4934243212<br/> O,-2.8843936576,0.2065571167,2.5106106718<br/> H,-5.5366426925,-4.339926167,1.1062411274<br/> H,-0.5449103175,-6.8931920376,-2.0016556926<br/> H,6.5883655992,-2.7014414626,2.0428772305<br/> H,6.6175159498,2.5513482359,-1.9350410803<br/> H,-0.8520402154,6.9037481145,1.1207914056<br/> H,-4.2535972203,3.0059149882,-3.9962334368<br/> Na,-2.3327739979,2.1552375938,3.6280819851</p> |
| 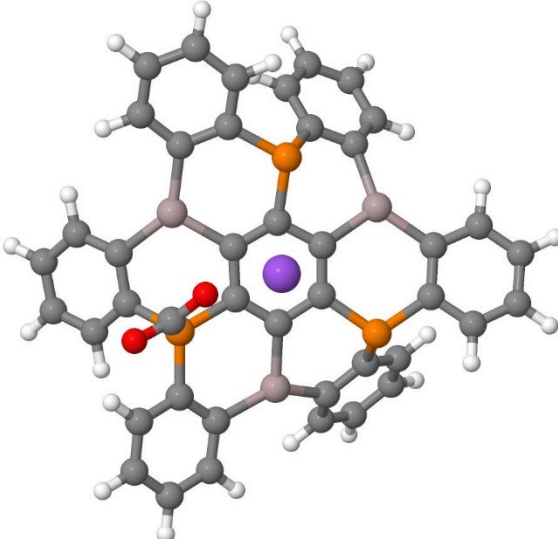 | <p><b>Al<sub>3</sub>N<sub>3</sub>-NG-Na/CO<sub>2</sub></b><br/> <b>E=-2856.39777560H; FreqIm=1</b><br/> C,-4.3227449419,-4.5092243783,2.0105563741<br/> C,-3.2526747555,-2.2174522206,0.7642520515<br/> C,-2.5083128407,-3.4249267822,0.7706067614<br/> C,-4.4978292459,-2.1747487228,1.4141768121<br/> C,-5.0249260532,-3.3026962299,2.025899665<br/> N,2.0746552671,-1.5609035473,0.2523919782<br/> N,-2.8610822638,-0.9929812627,0.095328781<br/> C,-0.4427177605,-1.3355758948,0.2267257423<br/> C,1.0724356775,-3.899572212,-0.1725576754<br/> C,0.8260622305,-0.7521409957,0.2674295442<br/> C,-4.6938313734,-1.235277751,-1.4563248481<br/> H,-4.4344261506,-2.2894559596,-1.4978423936<br/> C,-3.9296725471,-0.3679703564,-0.6562839511<br/> C,-1.5531605583,-0.4486882985,0.1676854854<br/> C,1.3615641565,-5.2140496907,-0.5936134068<br/> H,0.5675600208,-5.9575384514,-0.584370843<br/> C,-4.2601467437,1.0092783952,-0.6052475756<br/> C,2.1266327968,-2.9638448906,-0.2012333893<br/> C,3.4043588823,-3.3536511008,-0.6249383418<br/> H,4.2207840062,-2.6334809662,-0.6022148976<br/> C,2.6255503949,-5.6000335215,-1.017432469<br/> Al,-0.6702032839,-3.2128082142,0.2823792037<br/> C,-5.7892545457,-0.7685392404,-2.1696290503<br/> H,-6.3624947091,-1.4608707769,-2.7790774227<br/> C,-6.1501946675,0.5784361046,-2.1055818071<br/> C,-5.3785968568,1.4448884596,-1.3425092232<br/> H,-5.650555553,2.4978569664,-1.3155105437</p>                                                                                                                                                                                                                           |

|  |                                                                                                                                                                                                                                                                                                                                                                                                                                                                                                                                                                                                                                                                                                                                                                                                                                                                                                                                                                                                                                                                                                                                                                                                                                                                                                                                                                                                                                                                                                                                                                                                                                                                                                                                                                                                                                                                                                                                                                                                                                                                                                                                                                                                                                                                                                                                                                                             |
|--|---------------------------------------------------------------------------------------------------------------------------------------------------------------------------------------------------------------------------------------------------------------------------------------------------------------------------------------------------------------------------------------------------------------------------------------------------------------------------------------------------------------------------------------------------------------------------------------------------------------------------------------------------------------------------------------------------------------------------------------------------------------------------------------------------------------------------------------------------------------------------------------------------------------------------------------------------------------------------------------------------------------------------------------------------------------------------------------------------------------------------------------------------------------------------------------------------------------------------------------------------------------------------------------------------------------------------------------------------------------------------------------------------------------------------------------------------------------------------------------------------------------------------------------------------------------------------------------------------------------------------------------------------------------------------------------------------------------------------------------------------------------------------------------------------------------------------------------------------------------------------------------------------------------------------------------------------------------------------------------------------------------------------------------------------------------------------------------------------------------------------------------------------------------------------------------------------------------------------------------------------------------------------------------------------------------------------------------------------------------------------------------------|
|  | <p> C,3.6535642804,-4.6558661273,-1.0323338958<br/> H,4.6513941742,-4.9338370253,-1.3572263911<br/> Al,-2.8743138506,2.1179263878,0.1338099564<br/> C,-1.3719882369,0.9534686727,0.1375993801<br/> C,3.4544496846,4.9764167016,-1.4159544432<br/> C,1.3446381112,3.4919471989,-0.2979610635<br/> C,2.6794915751,3.0696734288,-0.0782849343<br/> C,3.7062034672,3.8405047309,-0.654892463<br/> H,4.7404171347,3.5373958841,-0.5051014308<br/> C,1.091327776,4.6171623983,-1.0987928153<br/> H,0.0640924808,4.928988126,-1.2667939216<br/> C,2.132431908,5.3535942838,-1.6487839076<br/> H,1.9078451776,6.2222857257,-2.2605138819<br/> N,0.1581017925,2.8733426144,0.2763392215<br/> C,1.064553982,0.6231709384,0.2457549728<br/> C,3.4703691006,-0.1222905809,1.7942414024<br/> C,-0.1504780345,4.8340405484,1.6480255877<br/> H,0.9293080525,4.8510367504,1.7588232787<br/> C,-0.7532476373,3.8067642373,0.9000473502<br/> C,-0.055760447,1.4789635974,0.2267136105<br/> C,4.2324706142,-0.0297556695,2.965844827<br/> H,4.6924966727,0.9203784071,3.2263248506<br/> C,-2.1664583109,3.7713530186,0.7868083912<br/> C,2.8945905063,-1.3744091109,1.4940940308<br/> C,3.0611639067,-2.4695078776,2.3459671277<br/> H,2.6133300894,-3.430510988,2.1167497851<br/> C,4.4165266679,-1.1169792358,3.8172349862<br/> Al,2.8746956254,1.2490049614,0.5516030785<br/> C,-0.9130485332,5.8292186608,2.240345591<br/> H,-0.417065498,6.6053891015,2.8155739737<br/> C,-2.3033844548,5.8301794461,2.1095020848<br/> C,-2.9068697162,4.7998492645,1.4043224301<br/> H,-3.9920991103,4.7861168408,1.3284147666<br/> C,3.8189734291,-2.3343333249,3.5067726411<br/> H,3.9381450673,-3.1893717275,4.1650106852<br/> C,-3.076300989,-4.5491228322,1.4026424885<br/> H,-2.518409258,-5.4829696926,1.419171474<br/> H,-5.0591463638,-1.245331185,1.4295792781<br/> H,-5.9872120092,-3.2357869515,2.5245857652<br/> O,3.6691902022,0.1550034862,-1.0352878849<br/> C,2.8084662583,-0.5853457089,-1.430607953<br/> O,2.1191585416,-0.9895532493,-2.3012590124<br/> H,2.8132145047,-6.6218345108,-1.3317093421<br/> H,-4.7364500863,-5.394622563,2.4825388683<br/> H,-7.0125500643,0.9445295598,-2.6537002529<br/> H,-2.9007401995,6.6125601751,2.5665811739<br/> H,4.274105352,5.551619608,-1.8351733981<br/> H,5.0136266745,-1.0131940621,4.7179704495<br/> Na,-0.0914225919,-0.0435837925,-2.0987000765 </p> |
|--|---------------------------------------------------------------------------------------------------------------------------------------------------------------------------------------------------------------------------------------------------------------------------------------------------------------------------------------------------------------------------------------------------------------------------------------------------------------------------------------------------------------------------------------------------------------------------------------------------------------------------------------------------------------------------------------------------------------------------------------------------------------------------------------------------------------------------------------------------------------------------------------------------------------------------------------------------------------------------------------------------------------------------------------------------------------------------------------------------------------------------------------------------------------------------------------------------------------------------------------------------------------------------------------------------------------------------------------------------------------------------------------------------------------------------------------------------------------------------------------------------------------------------------------------------------------------------------------------------------------------------------------------------------------------------------------------------------------------------------------------------------------------------------------------------------------------------------------------------------------------------------------------------------------------------------------------------------------------------------------------------------------------------------------------------------------------------------------------------------------------------------------------------------------------------------------------------------------------------------------------------------------------------------------------------------------------------------------------------------------------------------------------|

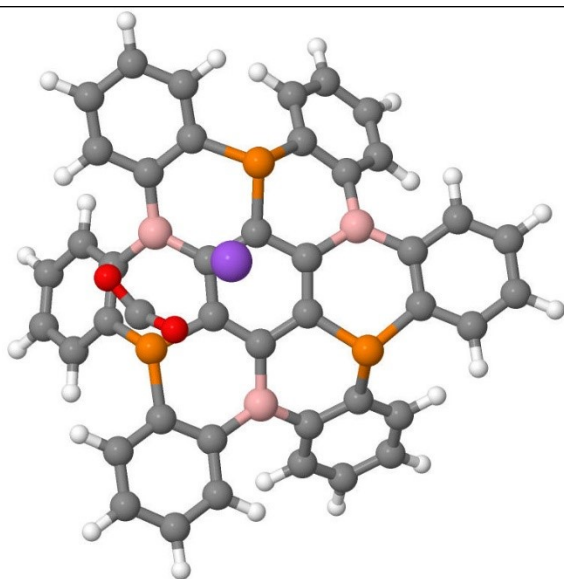

**B<sub>3</sub>P<sub>3</sub>-NG-Na/CO<sub>2</sub>**

**E=-3063.52702459H; FreqIm=1**

C,2.8369746598,-4.7803196469,-2.3891262797  
 C,2.9308207327,-2.7959890388,-0.4201223645  
 C,1.7004664565,-3.4580434185,-0.6741043615  
 C,4.0858887609,-3.1468882787,-1.1148727634  
 C,4.0355439532,-4.1325816785,-2.101902643  
 P,-2.4941202812,-1.6640449482,0.352020018  
 P,2.9477853679,-1.5828053807,0.9598322805  
 C,0.2847687236,-1.463650442,0.355060386  
 C,-0.8794633002,-3.9206598995,0.172629365  
 C,-0.9231642543,-0.7932495149,0.2442983356  
 C,5.6007056358,-0.8939663707,1.0294401474  
 H,5.7521792265,-1.956463106,1.2088856446  
 C,4.3135871364,-0.4016093617,0.7730163379  
 C,1.4517076966,-0.6595242291,0.5441550748  
 C,-0.7153440914,-5.3117246972,0.2835402531  
 H,0.2854552986,-5.7299125227,0.2244145783  
 C,4.0939219831,0.9908045493,0.6086247968  
 C,-2.2016145079,-3.4316300556,0.3113297469  
 C,-3.2895307796,-4.2806530008,0.5280974564  
 H,-4.2912710645,-3.8751588792,0.6554616602  
 C,-1.7944912435,-6.1679857746,0.4965150083  
 B,0.3728013677,-2.9885787606,-0.004338107  
 C,6.6900768789,-0.0323766548,1.0970481895  
 H,7.6833011243,-0.4302563428,1.2824122653  
 C,6.4938111308,1.3429048886,0.9717819655  
 C,5.21607794,1.8362388041,0.7400127847  
 H,5.0733846256,2.9113855422,0.6812219951  
 C,-3.0852577187,-5.656394668,0.606877334  
 H,-3.9276856214,-6.3198836196,0.7745092521  
 B,2.6825250047,1.5988726385,0.3540617628  
 C,1.386969566,0.7404869936,0.5872668837  
 C,-4.234258766,4.6740868702,0.4146286229  
 C,-1.6213412384,3.6831332783,0.6115687604  
 C,-2.6582142859,2.8131826433,0.1860410585  
 C,-3.9629930611,3.3433750929,0.122528677  
 H,-4.7854966824,2.6813865939,-0.1331125345  
 C,-1.9039147654,5.0190695541,0.9278825534  
 H,-1.1163989719,5.6696046027,1.3032425932  
 C,-3.1952779181,5.5207280103,0.8010056622  
 H,-3.3953048444,6.5617646097,1.0364052047  
 P,0.0473439928,3.0948669601,1.0394665602  
 C,-1.0719904295,0.6198116832,0.3010036727  
 C,-3.3831936243,0.4686821422,-1.0613230088  
 C,1.0924258213,4.9723787045,-0.7954107709  
 H,0.1773633811,5.5396229229,-0.6534429221  
 C,1.2875093949,3.7595431964,-0.1377879899  
 C,0.0964488216,1.3558089298,0.5364035045  
 C,-4.0971924309,1.0658111851,-2.1093044349  
 H,-4.0169347276,2.1379514414,-2.2652908134  
 C,2.4747650918,3.0057566027,-0.314514284  
 C,-3.4872677064,-0.9399530136,-0.9570085933  
 C,-4.2864534793,-1.7014448417,-1.8043662896  
 H,-4.3401611183,-2.7816713849,-1.696655974  
 C,-4.8919348045,0.3146367657,-2.9776543591  
 B,-2.4161615101,1.3122635831,-0.1340780334  
 C,2.0562916267,5.4426195535,-1.6872593559  
 H,1.8887792972,6.37695683,-2.2147940611  
 C,3.2116912207,4.7021924329,-1.9196817826  
 C,3.4117468193,3.5040773073,-1.2386350531  
 H,4.3059103547,2.9249303048,-1.4506620352  
 C,-4.9978204849,-1.0638590728,-2.8213580017

|                                                                                    |                                                                                                                                                                                                                                                                                                                                                                                                                                                                                                                                                                                                                                                                                                                                                                                                                                                                                                                                                                                                                                                                                                                                                                                                                                                                                                                                                                                                                                                                                                                                                                                                                                                                                                                                                                                                                                                                                                                                                                                                                                                                                                                                                                                                                                                                                                                                                                             |
|------------------------------------------------------------------------------------|-----------------------------------------------------------------------------------------------------------------------------------------------------------------------------------------------------------------------------------------------------------------------------------------------------------------------------------------------------------------------------------------------------------------------------------------------------------------------------------------------------------------------------------------------------------------------------------------------------------------------------------------------------------------------------------------------------------------------------------------------------------------------------------------------------------------------------------------------------------------------------------------------------------------------------------------------------------------------------------------------------------------------------------------------------------------------------------------------------------------------------------------------------------------------------------------------------------------------------------------------------------------------------------------------------------------------------------------------------------------------------------------------------------------------------------------------------------------------------------------------------------------------------------------------------------------------------------------------------------------------------------------------------------------------------------------------------------------------------------------------------------------------------------------------------------------------------------------------------------------------------------------------------------------------------------------------------------------------------------------------------------------------------------------------------------------------------------------------------------------------------------------------------------------------------------------------------------------------------------------------------------------------------------------------------------------------------------------------------------------------------|
|                                                                                    | <p>H,-5.6167181709,-1.6469941646,-3.4959016535<br/> C,1.6884008117,-4.4439641664,-1.6780547061<br/> H,0.752174156,-4.9363499291,-1.9282926825<br/> H,5.0241401468,-2.6352022421,-0.921510318<br/> H,4.9360845279,-4.3814608757,-2.6556534873<br/> O,-3.7863185441,0.0245849192,2.007608001<br/> C,-2.9687172204,-0.871516433,2.1000302935<br/> O,-2.1812999082,-1.2614033598,2.9792355525<br/> H,-1.6259873665,-7.2368561203,0.5845336434<br/> H,2.7965190354,-5.5381746145,-3.1650587147<br/> H,7.3320957004,2.025682855,1.0695941178<br/> H,3.9523737513,5.053276227,-2.631343372<br/> H,-5.2517984555,5.0480798271,0.3595514918<br/> H,-5.4281839571,0.8108520789,-3.7807254408<br/> Na,-0.8264173163,0.4707601539,3.1653194495</p>                                                                                                                                                                                                                                                                                                                                                                                                                                                                                                                                                                                                                                                                                                                                                                                                                                                                                                                                                                                                                                                                                                                                                                                                                                                                                                                                                                                                                                                                                                                                                                                                                                      |
| 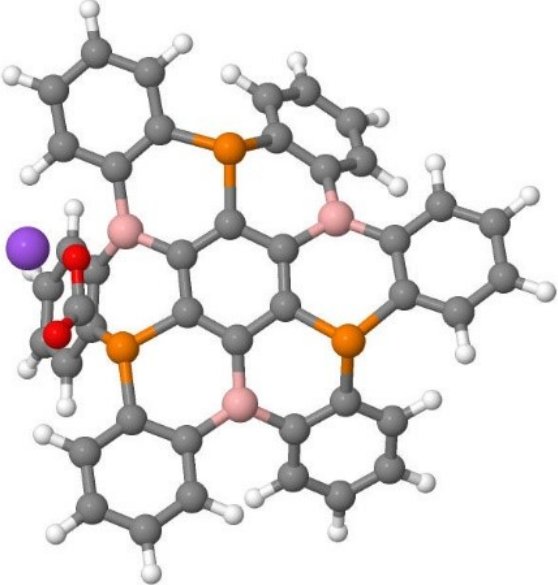 | <p><b>B<sub>3</sub>P<sub>3</sub>-NG-Na/CO<sub>2</sub> (2)</b><br/> <b>E=-3063.53948693H; FreqIm=1</b><br/> C,-3.1669755038,-4.7242533885,2.1115201337<br/> C,-3.1463653302,-2.6732628759,0.2019358947<br/> C,-1.940827605,-3.3722952261,0.4814702532<br/> C,-4.3324939163,-3.0246220974,0.8449288137<br/> C,-4.339985027,-4.0400579631,1.8012608954<br/> P,2.299182351,-1.6557597928,-0.1193366826<br/> P,-3.1021766052,-1.4231858449,-1.145680454<br/> C,-0.443312819,-1.4036897961,-0.4970977842<br/> C,0.6743598746,-3.8730393359,-0.2079036443<br/> C,0.775050965,-0.748817745,-0.3394693617<br/> C,-5.7305423161,-0.6356113039,-1.2076568995<br/> H,-5.9138238127,-1.6781645343,-1.459990749<br/> C,-4.4305312054,-0.2043248059,-0.9095236964<br/> C,-1.5771469916,-0.5643794621,-0.6894892391<br/> C,0.5021887893,-5.2558007013,-0.3794910153<br/> H,-0.5055949613,-5.6574842788,-0.4344117362<br/> C,-4.1690610704,1.1661592412,-0.6555529128<br/> C,2.0139377567,-3.4126900694,-0.191943204<br/> C,3.109896428,-4.2709146804,-0.309533918<br/> H,4.1233030571,-3.876705713,-0.3109308974<br/> C,1.5864704674,-6.1241171635,-0.5047303812<br/> B,-0.5806658989,-2.9153768262,-0.1231625435<br/> C,-6.7915121673,0.2634744421,-1.2252677266<br/> H,-7.7949894528,-0.0886909214,-1.4452882717<br/> C,-6.5531463419,1.6196774055,-1.004062099<br/> C,-5.2616261745,2.0545799712,-0.7330610098<br/> H,-5.0834131739,3.1178515451,-0.5991180718<br/> C,2.891353831,-5.6382491979,-0.4561924526<br/> H,3.7343139318,-6.3151865788,-0.5506158395<br/> B,-2.7367606352,1.7109419308,-0.3708000526<br/> C,-1.4702913294,0.8344514571,-0.6736565161<br/> C,4.2375664484,4.6273681032,-0.1945781828<br/> C,1.6104899649,3.6934658582,-0.523306698<br/> C,2.6282432282,2.7826472167,-0.1556884319<br/> C,3.9350228958,3.2837204019,-0.0070941486<br/> H,4.7316977839,2.5922139188,0.261669316<br/> C,1.925394292,5.0457792379,-0.731703738<br/> H,1.1527128108,5.73625596,-1.0646574168<br/> C,3.2208802748,5.5159530252,-0.5477433338<br/> H,3.4410127115,6.5684679125,-0.7000536607<br/> P,-0.0839089824,3.1891865784,-0.9956444948<br/> C,0.9665534224,0.6452149501,-0.3722887365<br/> C,3.068997168,0.4821262223,1.2836759218<br/> C,-1.0247444276,4.9096996519,1.0597735155<br/> H,-0.0915578298,5.4571564424,0.9615203081<br/> C,-1.2633654478,3.7720824869,0.29089419</p> |

|                                                                                     |                                                                                                                                                                                                                                                                                                                                                                                                                                                                                                                                                                                                                                                                                                                                                                                                                                                                                                                                                                                                                                                                                                                                                                                                                                                                                                                                                                                                                                                                                                                                                                                                                                                   |
|-------------------------------------------------------------------------------------|---------------------------------------------------------------------------------------------------------------------------------------------------------------------------------------------------------------------------------------------------------------------------------------------------------------------------------------------------------------------------------------------------------------------------------------------------------------------------------------------------------------------------------------------------------------------------------------------------------------------------------------------------------------------------------------------------------------------------------------------------------------------------------------------------------------------------------------------------------------------------------------------------------------------------------------------------------------------------------------------------------------------------------------------------------------------------------------------------------------------------------------------------------------------------------------------------------------------------------------------------------------------------------------------------------------------------------------------------------------------------------------------------------------------------------------------------------------------------------------------------------------------------------------------------------------------------------------------------------------------------------------------------|
|                                                                                     | <p>C,-0.1730191072,1.4180335419,-0.607215543<br/> C,3.627139571,1.1279002006,2.3926075215<br/> H,3.6178997304,2.2135606688,2.4370420174<br/> C,-2.4785460755,3.0500259526,0.4113810086<br/> C,3.0812612316,-0.9301348634,1.3213591524<br/> C,3.6332886895,-1.6715690081,2.3616475275<br/> H,3.6157494229,-2.7586542744,2.3440422454<br/> C,4.1784025338,0.4059116008,3.4550107618<br/> B,2.3405131554,1.2669608674,0.0911102589<br/> C,-1.9659944729,5.3288139424,2.0005216452<br/> H,-1.7613851711,6.2031240145,2.6117618572<br/> C,-3.1486001646,4.614982333,2.1711979469<br/> C,-3.3947085467,3.4940376073,1.3822097013<br/> H,-4.3102251193,2.9315010071,1.542983747<br/> C,4.1900159622,-0.9868529807,3.4419446074<br/> H,4.6175996307,-1.540156361,4.2719934033<br/> C,-1.9877407378,-4.3905577254,1.453299937<br/> H,-1.0725694803,-4.9119292635,1.7220956148<br/> H,-5.2523436572,-2.4867915852,0.6351248326<br/> H,-5.2654581558,-4.284441089,2.3147254465<br/> O,3.5052762671,0.2585881468,-1.4776984733<br/> C,3.387818082,-0.9994052735,-1.5197466419<br/> O,3.8938414039,-1.7683260505,-2.3447424022<br/> H,1.4106027164,-7.1865799886,-0.6435269195<br/> H,-3.1710167334,-5.5061906122,2.8643337698<br/> H,-7.3687307586,2.3341598215,-1.0589437421<br/> H,-3.8738460435,4.9264324169,2.9165944722<br/> H,5.2558758557,4.9834656636,-0.0691676893<br/> H,4.5986800164,0.9384014983,4.303005066<br/> Na,4.6745865282,0.1016031356,-3.3978850445</p>                                                                                                                                                                                  |
| 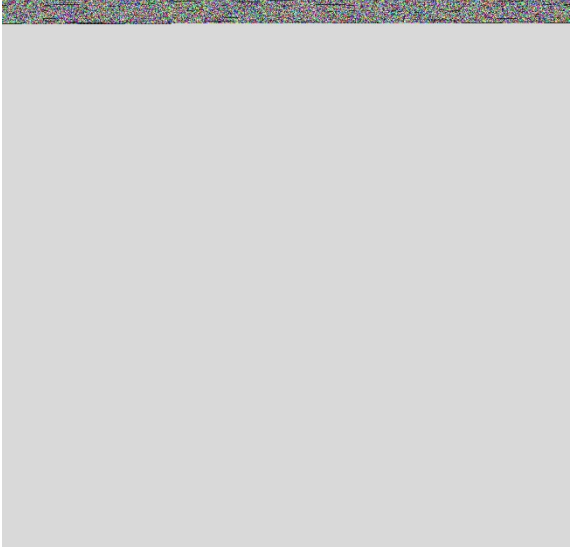 | <p><b>Al<sub>3</sub>P<sub>3</sub>-NG-Na/CO<sub>2</sub></b><br/> <b>E=-3716.14879332H; FreqIm=1</b><br/> C,-3.2042770925,-4.8964911625,2.5282827845<br/> C,-2.9541468765,-2.9776173201,0.4929961994<br/> C,-1.8605571193,-3.8325038885,0.7896518516<br/> C,-4.142443894,-3.0902428623,1.2171744408<br/> C,-4.2628408184,-4.0458947693,2.2296481383<br/> P,2.662979142,-1.415754053,-0.3716710245<br/> P,-2.8158170073,-1.855187855,-0.9920760035<br/> C,-0.1583013068,-1.432504051,-0.393533213<br/> C,1.633479628,-4.0816676036,-0.0929890406<br/> C,0.9941050351,-0.6645916576,-0.2267950991<br/> C,-5.4743369808,-1.7412029772,-1.4765271151<br/> H,-5.2795747266,-2.7621885052,-1.8009147982<br/> C,-4.4199253102,-0.9439736215,-1.0026735915<br/> C,-1.4004348084,-0.7342572144,-0.5311995914<br/> C,1.8719853109,-5.4658642212,-0.1050741822<br/> H,1.0539981386,-6.1526387766,0.1043125727<br/> C,-4.6701374568,0.3946550779,-0.6182754252<br/> C,2.7321990465,-3.2358509593,-0.3770551681<br/> C,3.9937896807,-3.7612885372,-0.6939579655<br/> H,4.8183181769,-3.0995919479,-0.9467254423<br/> C,3.1287606359,-5.9955213716,-0.3934644667<br/> Al,-0.1505807235,-3.3368627482,0.0417908762<br/> C,-6.7755309997,-1.2499432239,-1.5254047886<br/> H,-7.578625752,-1.8876576769,-1.8826593161<br/> C,-7.0410862162,0.0600445118,-1.1287526772<br/> C,-5.9936951882,0.8675907772,-0.6956934853<br/> H,-6.2127909883,1.896667222,-0.4154922381<br/> C,4.185545993,-5.1412525215,-0.6985868339<br/> H,5.1628650759,-5.5437202951,-0.946163524<br/> Al,-3.1754421887,1.539739492,-0.2099537137<br/> C,-1.4574249775,0.66506204,-0.5310253629</p> |



|  |                                                                                                                                                                                                                                                                                                                                                                                                                                                                                                                                                                                                                                                                                                                                                                                                                                                                                                                                                                                                                                                                                                                                                                                                                                                                                                                                                                                                                                                                                                                                                                                                                                                                                                                                                                                                                                                                                                                                                                                                                                                                                                                                                                                                 |
|--|-------------------------------------------------------------------------------------------------------------------------------------------------------------------------------------------------------------------------------------------------------------------------------------------------------------------------------------------------------------------------------------------------------------------------------------------------------------------------------------------------------------------------------------------------------------------------------------------------------------------------------------------------------------------------------------------------------------------------------------------------------------------------------------------------------------------------------------------------------------------------------------------------------------------------------------------------------------------------------------------------------------------------------------------------------------------------------------------------------------------------------------------------------------------------------------------------------------------------------------------------------------------------------------------------------------------------------------------------------------------------------------------------------------------------------------------------------------------------------------------------------------------------------------------------------------------------------------------------------------------------------------------------------------------------------------------------------------------------------------------------------------------------------------------------------------------------------------------------------------------------------------------------------------------------------------------------------------------------------------------------------------------------------------------------------------------------------------------------------------------------------------------------------------------------------------------------|
|  | <p> C,3.2700043938,5.9526286007,-0.2942108313<br/> C,1.1000110418,4.1724989118,-0.4661345035<br/> C,2.3722131385,3.6851971142,-0.0843492443<br/> C,3.4390898138,4.601604517,-0.0122829615<br/> H,4.4315515112,4.2494978601,0.2636881717<br/> C,0.9460769048,5.5316096612,-0.7883155814<br/> H,-0.0222450559,5.9059012732,-1.1169361236<br/> C,2.0144099726,6.4162822136,-0.6868620859<br/> H,1.8689113639,7.4650644503,-0.9279773344<br/> P,-0.4604165598,3.221061217,-0.7173745093<br/> C,0.9972390783,0.7629167913,-0.207479578<br/> C,3.9391165981,0.6480570662,1.0055372021<br/> C,-1.2170423402,4.8032894855,1.5359662951<br/> H,-0.2226982911,5.2377644736,1.5003698239<br/> C,-1.5813817842,3.7762041864,0.6634925552<br/> C,-0.2394295661,1.4026609668,-0.3691370928<br/> C,4.8823948393,1.1277045092,1.9245353303<br/> H,5.0276837869,2.200012324,2.0396227998<br/> C,-2.8784751998,3.2067236813,0.7325765879<br/> C,3.7867305012,-0.757427657,0.9103715795<br/> C,4.5345797962,-1.6277968628,1.704089799<br/> H,4.4032763599,-2.7029996642,1.6325328657<br/> C,5.6484108395,0.264131639,2.7106251509<br/> Al,2.6020893947,1.7954933818,0.177334071<br/> C,-2.131774031,5.2825659222,2.4772955323<br/> H,-1.8333660422,6.0795649807,3.152199665<br/> C,-3.4110828341,4.7437663083,2.5555066807<br/> C,-3.7683427938,3.7040118014,1.6959669033<br/> H,-4.7658549714,3.2762087264,1.7824904364<br/> C,5.4651253037,-1.1100203104,2.606938546<br/> H,6.0447986183,-1.7881084019,3.2256124183<br/> C,-2.0094139925,-4.7743886988,1.8181310267<br/> H,-1.1808019345,-5.4325315567,2.0745394506<br/> H,-4.9844457666,-2.4376849078,1.006886088<br/> H,-5.1931206802,-4.1180592692,2.7856728591<br/> O,4.4739151124,-1.1712715579,-2.3454754113<br/> C,3.3618170344,-0.7566488835,-2.1215444917<br/> O,2.5498143388,-0.0055123348,-2.6978062716<br/> H,3.2795499985,-7.0708474064,-0.3943810725<br/> H,-3.3039998445,-5.6437282707,3.3095524075<br/> H,-8.0532355673,0.4507006456,-1.1720593188<br/> H,-4.1226055869,5.123105976,3.2826040445<br/> H,4.1099515667,6.637064611,-0.2255525026<br/> H,6.3795113283,0.6655157092,3.4058350744<br/> Na,0.4323847749,0.403634477,-2.8076432473 </p> |
|--|-------------------------------------------------------------------------------------------------------------------------------------------------------------------------------------------------------------------------------------------------------------------------------------------------------------------------------------------------------------------------------------------------------------------------------------------------------------------------------------------------------------------------------------------------------------------------------------------------------------------------------------------------------------------------------------------------------------------------------------------------------------------------------------------------------------------------------------------------------------------------------------------------------------------------------------------------------------------------------------------------------------------------------------------------------------------------------------------------------------------------------------------------------------------------------------------------------------------------------------------------------------------------------------------------------------------------------------------------------------------------------------------------------------------------------------------------------------------------------------------------------------------------------------------------------------------------------------------------------------------------------------------------------------------------------------------------------------------------------------------------------------------------------------------------------------------------------------------------------------------------------------------------------------------------------------------------------------------------------------------------------------------------------------------------------------------------------------------------------------------------------------------------------------------------------------------------|

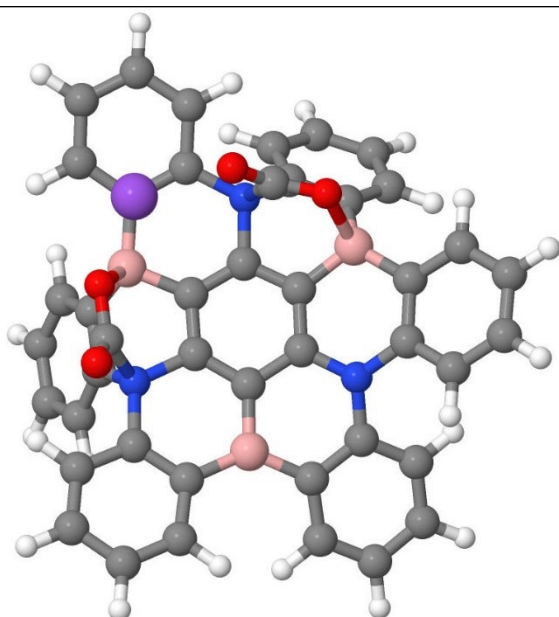

**1CO<sub>2</sub>-B<sub>3</sub>N<sub>3</sub>-NG-Na/CO<sub>2</sub>**

**E=-2392.31943728H; FreqIm=1**

C,-5.8704149905,1.9939013919,1.4688931298  
 C,-3.2450545272,2.2261210206,0.4680791039  
 C,-3.9139036792,0.96802439,0.4069630535  
 C,-3.8889257295,3.3259938285,1.0651657373  
 C,-5.1797872656,3.2100343797,1.5483004106  
 N,-1.1169917108,-2.5178545801,-0.2010238153  
 N,-1.908265487,2.3771302431,0.0192462862  
 C,-1.6169186815,-0.0361997347,-0.0034879084  
 C,-3.5313200056,-1.7394888476,-0.3586174511  
 C,-0.7092441875,-1.082403756,0.0041797168  
 C,-2.2872864776,4.5411025137,-1.0536915816  
 H,-3.330376261,4.2725695834,-1.1775216119  
 C,-1.3936541485,3.6415499976,-0.4551822609  
 C,-1.0717966179,1.2721449789,0.0368682814  
 C,-4.8519267908,-2.1048251662,-0.6834002565  
 H,-5.6157042021,-1.3343711929,-0.6921277273  
 C,-0.0134191506,3.9570332911,-0.4100067602  
 C,-2.5708017178,-2.7631573897,-0.4375506355  
 C,-2.9024580771,-4.0713704871,-0.781423938  
 H,-2.1352030147,-4.8381828814,-0.8351551674  
 C,-5.2021454715,-3.402708494,-1.0297394191  
 C,-1.8463180858,5.7749012772,-1.5146999839  
 H,-2.5598261379,6.4517999892,-1.974961396  
 C,-0.5030277771,6.1351121336,-1.4065716081  
 C,0.3925772059,5.2161948075,-0.8773868882  
 H,1.453791419,5.4555484026,-0.8477855128  
 C,-4.2222125286,-4.394347641,-1.0668783488  
 H,-4.477438029,-5.4138661564,-1.3371157676  
 C,0.3139908995,1.460098845,0.0510354197  
 C,5.3498358931,-2.5619162419,-0.6317049982  
 C,3.4791795731,-0.5388085889,-0.1766229326  
 C,3.0429325948,-1.8778808798,-0.1455205562  
 C,4.0181052766,-2.8696166804,-0.3752231396  
 H,3.7029220901,-3.9113933205,-0.349497752  
 C,4.8112918041,-0.217829052,-0.4621212947  
 H,5.1155806588,0.8236299566,-0.524356838  
 C,5.7437840688,-1.2222382913,-0.6807543118  
 H,6.7737838739,-0.9583260166,-0.8983010797  
 N,2.5731505393,0.6276745076,-0.0475052742  
 C,0.6577561529,-0.9465868407,0.0963482306  
 C,0.8688578519,-3.2783755062,1.049610184  
 C,3.9903465929,1.4118174205,1.8984216221  
 H,4.5160222618,0.4652588006,1.9409570238  
 C,2.9890170124,1.6599328006,0.9675038149  
 C,1.124147731,0.3448883475,0.0951048801  
 C,1.4615426448,-3.9881403237,2.0913435726  
 H,2.5406930349,-3.9463724126,2.2185667772  
 C,2.2520585184,2.8529789699,0.9502130766  
 C,-0.5239524683,-3.3500125584,0.9337572111  
 C,-1.3295728272,-4.050896075,1.8179795741  
 H,-2.4096194139,-4.0586326982,1.7330160445  
 C,0.6841695648,-4.7292249492,2.9838573249  
 C,4.3018895155,2.4161823513,2.8170020401  
 H,5.078506656,2.2349661537,3.5531424866  
 C,3.6198747139,3.6296371182,2.7996637883  
 C,2.5939623813,3.8370717398,1.8777512643  
 H,2.0314575098,4.7673329631,1.8875456746  
 C,-0.7011461461,-4.749838119,2.8521602896  
 H,-1.3096423667,-5.3051128709,3.558479188  
 C,-5.2296542204,0.8999867475,0.9217761051  
 H,-5.7357348753,-0.0602407891,0.9298691059

|                                                                                    |                                                                                                                                                                                                                                                                                                                                                                                                                                                                                                                                                                                                                                                                                                                                                                                                                                                                                                                                                                                                                                                                                                                                                                                                                                                                                                                                                                                                                                                                                                                                                                                                                                                                                                                                                                                                                                                                                                                                                                                                                                                                                                                                                                                                                                                            |
|------------------------------------------------------------------------------------|------------------------------------------------------------------------------------------------------------------------------------------------------------------------------------------------------------------------------------------------------------------------------------------------------------------------------------------------------------------------------------------------------------------------------------------------------------------------------------------------------------------------------------------------------------------------------------------------------------------------------------------------------------------------------------------------------------------------------------------------------------------------------------------------------------------------------------------------------------------------------------------------------------------------------------------------------------------------------------------------------------------------------------------------------------------------------------------------------------------------------------------------------------------------------------------------------------------------------------------------------------------------------------------------------------------------------------------------------------------------------------------------------------------------------------------------------------------------------------------------------------------------------------------------------------------------------------------------------------------------------------------------------------------------------------------------------------------------------------------------------------------------------------------------------------------------------------------------------------------------------------------------------------------------------------------------------------------------------------------------------------------------------------------------------------------------------------------------------------------------------------------------------------------------------------------------------------------------------------------------------------|
|                                                                                    | <p>H,-3.3588270989,4.2640149054,1.1813420225<br/> H,-5.6451115128,4.070091369,2.0207302682<br/> O,-0.9468552726,-3.1037058475,-2.5453850356<br/> C,-0.3126477989,-2.8816999342,-1.5673938958<br/> O,0.9690452334,-2.8297850534,-1.4098945558<br/> O,2.0144637876,2.4947418429,-1.5572629846<br/> C,2.467574771,1.3626482208,-1.6371185317<br/> O,2.7823548788,0.5759059246,-2.4981417574<br/> H,6.0748963623,-3.352541199,-0.7988249381<br/> H,1.1580775956,-5.2771942899,3.7923286795<br/> H,-6.2310246559,-3.6422920596,-1.2787937252<br/> H,-6.8770094298,1.9060879956,1.8642114753<br/> H,-0.1609720566,7.1017520393,-1.7621230777<br/> H,3.8731039907,4.4036490576,3.5174588808<br/> B,-3.1156819161,-0.2713464245,-0.0161910567<br/> B,1.5020391006,-2.257094881,0.0027285255<br/> B,1.0208611723,2.8459291773,-0.0429053734<br/> Na,2.5077498806,-1.6443902523,-2.7581081225</p>                                                                                                                                                                                                                                                                                                                                                                                                                                                                                                                                                                                                                                                                                                                                                                                                                                                                                                                                                                                                                                                                                                                                                                                                                                                                                                                                                                    |
| 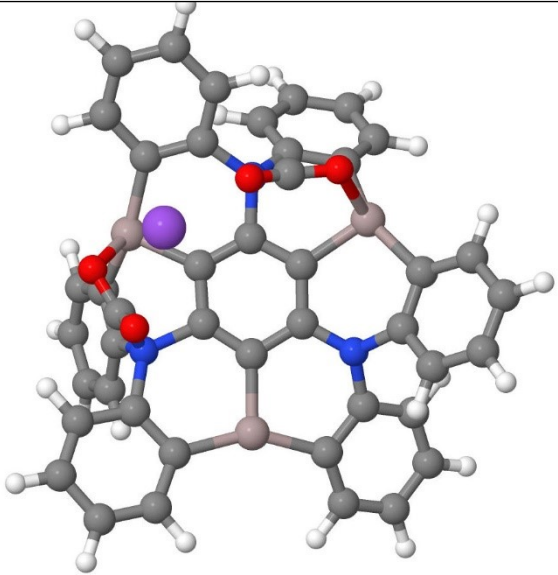 | <p><b>1CO<sub>2</sub>-Al<sub>3</sub>N<sub>3</sub>-NG-Na/CO<sub>2</sub></b><br/> <b>E=-3044.92493709H; FreqIm=1</b><br/> C,-4.7979663613,4.0930034008,1.8323645926<br/> C,-2.414190532,3.1243576755,0.6702011683<br/> C,-3.6225495619,2.3945902701,0.5151033196<br/> C,-2.4227486204,4.302261246,1.4382083738<br/> C,-3.5934580814,4.7791592186,2.0071617526<br/> N,-1.7295379615,-2.2076971946,-0.2341348427<br/> N,-1.1490695836,2.7856440875,0.0636021808<br/> C,-1.5047619752,0.3554690568,-0.0203059364<br/> C,-4.0702438154,-1.1279705391,-0.6065372175<br/> C,-0.9099741733,-0.883800163,-0.037260098<br/> C,-1.2958377681,4.7629788694,-1.3083159579<br/> H,-2.3504087967,4.5256621908,-1.4126952752<br/> C,-0.4669424013,3.9078645706,-0.5617168242<br/> C,-0.6226744496,1.4721144711,0.0523249548<br/> C,-5.4000958074,-1.3838424947,-0.9998276181<br/> H,-6.1247901621,-0.5739527915,-0.9589513594<br/> C,0.9172639882,4.1976861139,-0.4556204663<br/> C,-3.1825124059,-2.2088626385,-0.6825283087<br/> C,-3.5923061496,-3.4702961653,-1.1180772332<br/> H,-2.8903760489,-4.3024133724,-1.1356321738<br/> C,-5.8249702971,-2.6305764248,-1.4401499919<br/> Al,-3.3725059308,0.6081399723,-0.1099041525<br/> C,-0.795478082,5.9140353132,-1.9003585972<br/> H,-1.4635591558,6.5540371601,-2.4690976243<br/> C,0.554473601,6.2390288274,-1.7716954442<br/> C,1.3860631677,5.3730180972,-1.0731685738<br/> H,2.4447693508,5.6156812992,-1.005430891<br/> C,-4.9089712303,-3.6804852654,-1.5020509318<br/> H,-5.2172104605,-4.6641098091,-1.8414543485<br/> Al,2.0364195787,2.7325785098,0.1216098663<br/> C,0.7658286444,1.285486808,0.0567682333<br/> C,5.0366653152,-3.5625961532,-1.1559022857<br/> C,3.4033955408,-1.4086431009,-0.3813096419<br/> C,2.8982024142,-2.7258327422,-0.2635067978<br/> C,3.7535233698,-3.7752863087,-0.6721617927<br/> H,3.3951776105,-4.8001641474,-0.5978062977<br/> C,4.702515643,-1.1966399928,-0.8736685361<br/> H,5.0881352011,-0.1801127194,-0.9323681629<br/> C,5.5126396068,-2.2534426562,-1.2549583287<br/> H,6.5125221463,-2.0557890892,-1.6287666724<br/> N,2.7365533443,-0.1457265681,-0.0067033787<br/> C,0.4545453363,-1.1469946849,0.0278439048<br/> C,-0.3731496111,-3.5818655003,1.4597276364</p> |

|                                                                                     |                                                                                                                                                                                                                                                                                                                                                                                                                                                                                                                                                                                                                                                                                                                                                                                                                                                                                                                                                                                                                                                                                                                                                                                                                                                                                                                                                                                                                                                                                                                                                                                                                                                                                                                                                           |
|-------------------------------------------------------------------------------------|-----------------------------------------------------------------------------------------------------------------------------------------------------------------------------------------------------------------------------------------------------------------------------------------------------------------------------------------------------------------------------------------------------------------------------------------------------------------------------------------------------------------------------------------------------------------------------------------------------------------------------------------------------------------------------------------------------------------------------------------------------------------------------------------------------------------------------------------------------------------------------------------------------------------------------------------------------------------------------------------------------------------------------------------------------------------------------------------------------------------------------------------------------------------------------------------------------------------------------------------------------------------------------------------------------------------------------------------------------------------------------------------------------------------------------------------------------------------------------------------------------------------------------------------------------------------------------------------------------------------------------------------------------------------------------------------------------------------------------------------------------------|
|                                                                                     | <p>C,4.1962841622,-0.2567795455,1.9976325949<br/> H,4.2352020544,-1.3348768836,1.8833373401<br/> C,3.4577656779,0.5348177539,1.1127303938<br/> C,1.2599073114,-0.020363539,0.0596374069<br/> C,-0.351922584,-4.2946078602,2.6634244527<br/> H,0.5840367577,-4.7305143743,3.0030135669<br/> C,3.3831377129,1.934078645,1.2766858977<br/> C,-1.6124416565,-3.0466620285,1.06242005<br/> C,-2.7587620302,-3.1701099318,1.8457605862<br/> H,-3.7072195652,-2.7389163878,1.5505800094<br/> C,-1.4896145674,-4.4521422695,3.4527178328<br/> Al,1.0292414526,-2.981304345,0.2461427884<br/> C,4.8968604635,0.3391456177,3.0429886819<br/> H,5.4634526097,-0.2858904702,3.726392299<br/> C,4.8682287043,1.7204143997,3.2094226763<br/> C,4.1086561001,2.4953407732,2.3365080088<br/> H,4.0735365229,3.5712160373,2.4907355485<br/> C,-2.6870583937,-3.8759011553,3.0461694292<br/> H,-3.5803837576,-3.9710726057,3.6550688697<br/> C,-4.7928446319,2.9104511482,1.1087134961<br/> H,-5.7264107645,2.3622934412,0.999414294<br/> H,-1.4953253537,4.850036102,1.5753291535<br/> H,-3.5641867375,5.6898347467,2.5980465879<br/> O,-1.2553299476,-2.2237382573,-2.5508882219<br/> C,-0.9442449277,-2.7400282922,-1.5049512212<br/> O,0.0254037442,-3.5346652424,-1.2852648037<br/> O,3.04983915,2.0253282657,-1.5657125125<br/> C,2.8059103444,0.8864000677,-1.8437069916<br/> O,2.5450522607,0.0466994897,-2.6317061219<br/> H,5.661055402,-4.4001492555,-1.451089878<br/> H,-1.4379848537,-5.0090498201,4.3831949175<br/> H,-6.858376044,-2.7866667252,-1.7329470603<br/> H,-5.7165976983,4.4693193767,2.2709813418<br/> H,0.9517706478,7.1418214403,-2.2250136269<br/> H,5.4207503379,2.187079127,4.019144186<br/> Na,1.1665136613,-1.8045140796,-2.7460041942</p> |
| 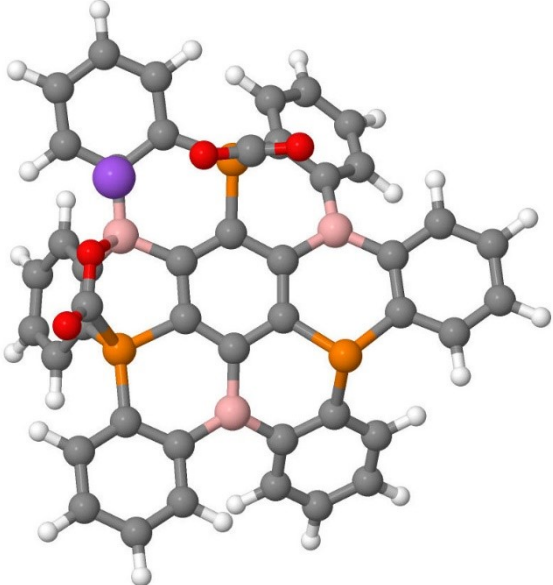 | <p><b>1CO<sub>2</sub>-B<sub>3</sub>P<sub>3</sub>-NG-Na/CO<sub>2</sub></b><br/> <b>E=-3252.07368137H; FreqIm=1</b><br/> C,-0.3093011898,-5.3306293446,2.6736375575<br/> C,-1.3063493099,-3.5132192242,0.8208596579<br/> C,0.096835249,-3.718509853,0.8729772555<br/> C,-2.1838811714,-4.224955236,1.6379572162<br/> C,-1.6829394392,-5.1372001008,2.5652325829<br/> P,3.3756369951,-0.7275701931,-0.9578849129<br/> P,-1.8888819197,-2.2807317813,-0.3784462735<br/> C,0.7050908912,-1.3857945715,-0.2941248473<br/> C,2.5645033055,-3.3648496096,-0.2822900936<br/> C,1.6789403475,-0.3834586467,-0.4486857048<br/> C,-4.6195203559,-2.4364522805,-0.0817322157<br/> H,-4.4608598053,-3.5046536248,-0.2141969832<br/> C,-3.5210542907,-1.5617406563,-0.0183600422<br/> C,-0.6539408307,-0.9824119928,-0.1912668882<br/> C,2.8369184923,-4.7491834411,-0.3180539792<br/> H,2.0221033821,-5.4488880249,-0.1559214781<br/> C,-3.7173981522,-0.1642663675,0.0641962326<br/> C,3.637927583,-2.4876530633,-0.5918071513<br/> C,4.9098809634,-3.0001940037,-0.8841530991<br/> H,5.7125987039,-2.3279150544,-1.1798065811<br/> C,4.1035097995,-5.2507302654,-0.5871049862<br/> B,1.1260681316,-2.8604001861,0.0349813849<br/> C,-5.9207930032,-1.9506980624,-0.0191793898<br/> H,-6.758878759,-2.6396802743,-0.0579056205<br/> C,-6.1391681661,-0.5749459441,0.0658829386</p>                                                                                                                                                                                                                                                                                                                                                                                     |

|  |                                                                                                                                                                                                                                                                                                                                                                                                                                                                                                                                                                                                                                                                                                                                                                                                                                                                                                                                                                                                                                                                                                                                                                                                                                                                                                                                                                                                                                                                                                                                                                                                                                                                                                                                                                                                                                                                                                                                                                                                                                                                                                                                                                                                                                                                                                                                                                                                                                                                                                                                                                                                                                             |
|--|---------------------------------------------------------------------------------------------------------------------------------------------------------------------------------------------------------------------------------------------------------------------------------------------------------------------------------------------------------------------------------------------------------------------------------------------------------------------------------------------------------------------------------------------------------------------------------------------------------------------------------------------------------------------------------------------------------------------------------------------------------------------------------------------------------------------------------------------------------------------------------------------------------------------------------------------------------------------------------------------------------------------------------------------------------------------------------------------------------------------------------------------------------------------------------------------------------------------------------------------------------------------------------------------------------------------------------------------------------------------------------------------------------------------------------------------------------------------------------------------------------------------------------------------------------------------------------------------------------------------------------------------------------------------------------------------------------------------------------------------------------------------------------------------------------------------------------------------------------------------------------------------------------------------------------------------------------------------------------------------------------------------------------------------------------------------------------------------------------------------------------------------------------------------------------------------------------------------------------------------------------------------------------------------------------------------------------------------------------------------------------------------------------------------------------------------------------------------------------------------------------------------------------------------------------------------------------------------------------------------------------------------|
|  | <p> C,-5.0497119475,0.2932073908,0.0978767636<br/> H,-5.2274199977,1.3660477488,0.1654317844<br/> C,5.1519465873,-4.3687345281,-0.8490510918<br/> H,6.1464265079,-4.7474166789,-1.0655852826<br/> B,-2.5383217599,0.9275986209,0.082319311<br/> C,-1.046276518,0.3476092454,-0.1312605031<br/> C,2.7035633853,5.886277115,-1.1171404438<br/> C,0.6858668481,4.1184875481,-0.4617198108<br/> C,2.0192961675,3.6294485432,-0.4598134523<br/> C,3.0104365064,4.560884563,-0.8055602929<br/> H,4.0452380614,4.2338487551,-0.8535033711<br/> C,0.3644683217,5.4440450803,-0.7604387273<br/> H,-0.6711037519,5.7755629268,-0.763337302<br/> C,1.3855413994,6.3345717153,-1.0849993601<br/> H,1.1484000255,7.3654819958,-1.3269304052<br/> P,-0.6262382522,2.9589857136,-0.1433166333<br/> C,1.3438269625,0.9942674077,-0.3662746925<br/> C,3.7901637943,1.6836795029,0.3900942357<br/> C,-1.5267677106,3.9821460257,2.3468744816<br/> H,-0.8062291703,4.7935556958,2.2798062791<br/> C,-1.6372746898,3.0318417398,1.3353640262<br/> C,-0.0057423292,1.2846106975,-0.2085468943<br/> C,4.5246229812,2.5465304432,1.2260306199<br/> H,4.163129317,3.5579305159,1.3942185148<br/> C,-2.5459933314,1.952702862,1.3540955763<br/> C,4.2638040792,0.3503782022,0.238872586<br/> C,5.4355696206,-0.058462126,0.8733279107<br/> H,5.7943879417,-1.0776196769,0.7636315921<br/> C,5.6814306534,2.1297266547,1.8767233917<br/> B,2.4138381134,2.1212486402,-0.188470876<br/> C,-2.3602676815,3.8540657685,3.4566434513<br/> H,-2.3005865361,4.5746321087,4.2659145843<br/> C,-3.2615796643,2.792101748,3.5246541155<br/> C,-3.3525012202,1.855789433,2.4904307037<br/> H,-4.0630202484,1.0370582085,2.5754008774<br/> C,6.1349652846,0.8251610219,1.6960166274<br/> H,7.0307781997,0.4843464321,2.2070137171<br/> C,0.5588321262,-4.6301021044,1.8389269582<br/> H,1.6281199927,-4.7741853862,1.9606406504<br/> H,-3.2539965579,-4.0482389559,1.5923664174<br/> H,-2.3667140798,-5.6754620344,3.2145416395<br/> O,-2.7821549907,1.8542709355,-1.2145612108<br/> C,-1.9616670122,2.8492303428,-1.4794005318<br/> O,-2.009785231,3.5857853678,-2.4264059772<br/> O,-1.0325193068,-3.3202084528,-2.9793525107<br/> C,-1.7914595083,-2.4626127625,-2.7029109481<br/> O,-2.5300570458,-1.5635740846,-3.030384433<br/> H,3.5002854149,6.5714689753,-1.390312217<br/> H,6.2216946878,2.8131160884,2.5241200548<br/> H,4.2718337515,-6.3229116225,-0.6104877121<br/> H,0.0880015143,-6.0210447609,3.4111943064<br/> H,-7.1515162074,-0.1834350985,0.1032786107<br/> H,-3.9025381934,2.6909969083,4.3956045996<br/> Na,-3.6817357542,0.2757853863,-2.5962532864 </p> |
|--|---------------------------------------------------------------------------------------------------------------------------------------------------------------------------------------------------------------------------------------------------------------------------------------------------------------------------------------------------------------------------------------------------------------------------------------------------------------------------------------------------------------------------------------------------------------------------------------------------------------------------------------------------------------------------------------------------------------------------------------------------------------------------------------------------------------------------------------------------------------------------------------------------------------------------------------------------------------------------------------------------------------------------------------------------------------------------------------------------------------------------------------------------------------------------------------------------------------------------------------------------------------------------------------------------------------------------------------------------------------------------------------------------------------------------------------------------------------------------------------------------------------------------------------------------------------------------------------------------------------------------------------------------------------------------------------------------------------------------------------------------------------------------------------------------------------------------------------------------------------------------------------------------------------------------------------------------------------------------------------------------------------------------------------------------------------------------------------------------------------------------------------------------------------------------------------------------------------------------------------------------------------------------------------------------------------------------------------------------------------------------------------------------------------------------------------------------------------------------------------------------------------------------------------------------------------------------------------------------------------------------------------------|

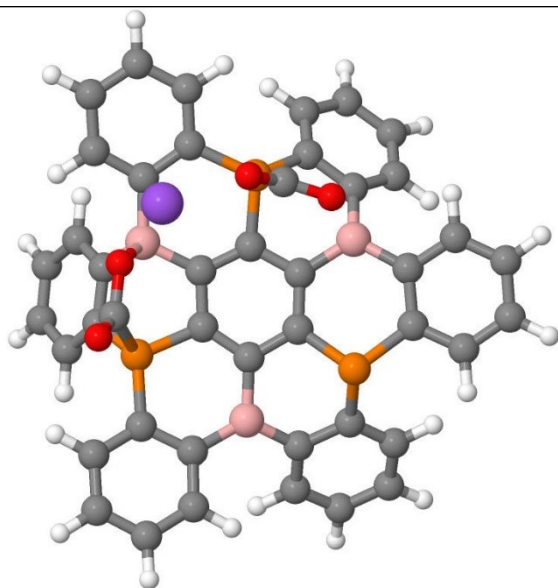

**1CO<sub>2</sub>-B<sub>3</sub>P<sub>3</sub>-NG-Na/CO<sub>2</sub> (2)**

**E=-3252.07177265H; FreqIm=1**

C,1.2701498147,-5.3346095969,2.6029127545  
 C,-0.3222182111,-3.7636484167,1.0037588255  
 C,1.0797580626,-3.6306371977,0.8631805983  
 C,-0.9265684814,-4.6539327816,1.8892387432  
 C,-0.1153406381,-5.4513328694,2.6929628684  
 P,3.3524071937,0.2054615696,-0.9135038478  
 P,-1.203741573,-2.6272658326,-0.0548252173  
 C,1.0051712672,-1.1113397152,-0.0633530982  
 C,3.2261970104,-2.6081724191,-0.5307064405  
 C,1.6783532329,0.1003427179,-0.2400279332  
 C,-3.7672947978,-3.5951130952,-0.0783286224  
 H,-3.2947311689,-4.5747527956,-0.105082435  
 C,-2.9870753699,-2.4336794159,0.03154398  
 C,-0.3900604267,-1.0506428258,0.1449949965  
 C,3.8207270728,-3.8680978719,-0.7296103581  
 H,3.1962665506,-4.7553767866,-0.6560097539  
 C,-3.5611487429,-1.139387299,0.0201579071  
 C,4.0500247955,-1.4660736469,-0.7032016735  
 C,5.4048881246,-1.6189222007,-1.0353657695  
 H,6.0195954941,-0.7433815384,-1.2334397865  
 C,5.1675915705,-4.0154421694,-1.0372426722  
 B,1.7180029537,-2.5296351588,-0.1111069959  
 C,-5.1495420789,-3.4956407349,-0.1834232856  
 H,-5.7545880235,-4.3933437172,-0.2605052995  
 C,-5.7456984237,-2.2342656694,-0.2115582774  
 C,-4.9599186003,-1.0867950946,-0.1183316193  
 H,-5.4418532578,-0.1109421481,-0.1434530441  
 C,5.9693588751,-2.8820001996,-1.1696440311  
 H,7.022645859,-2.979867349,-1.4151392606  
 B,-2.7439025495,0.2519080347,0.1129444936  
 C,-1.1360064483,0.1128925586,0.1706428548  
 C,1.0845143526,6.4088886766,-0.9666225421  
 C,-0.424471112,4.1763664481,-0.3523767401  
 C,0.9923395751,4.0530603311,-0.2988509417  
 C,1.7147049177,5.2100223401,-0.6283639057  
 H,2.7996646767,5.1634241888,-0.6445598658  
 C,-1.0673210993,5.3699854502,-0.6849801743  
 H,-2.1529582083,5.4199107958,-0.7298592693  
 C,-0.3044584278,6.4965574726,-0.9861325418  
 H,-0.7945706981,7.4277761913,-1.2509696786  
 P,-1.4159578137,2.7219726037,-0.0741095709  
 C,1.0017839346,1.3396349307,-0.1023628577  
 C,3.2358575754,2.6107957233,0.4971004153  
 C,-2.9504151432,3.615213633,2.1377646754  
 H,-2.4589662462,4.5837670571,2.0887811754  
 C,-2.6432393011,2.6061087384,1.2286699334  
 C,-0.3752532873,1.2861808857,0.0821905446  
 C,3.7743582812,3.6129299547,1.3261624955  
 H,3.1831568997,4.4999591737,1.540914614  
 C,-3.2378471452,1.3238687399,1.2374237743  
 C,4.0170715414,1.4362664723,0.2855106988  
 C,5.2810689767,1.3201721802,0.859643565  
 H,5.8739465382,0.4233220661,0.7057128205  
 C,5.027500806,3.482415768,1.9172120428  
 B,1.7644681855,2.7024873186,-0.0046127887  
 C,-3.895527946,3.3436465678,3.1254352373  
 H,-4.1560567314,4.1070845274,3.8513105775  
 C,-4.4932687706,2.0854214064,3.1813043037  
 C,-4.1674522226,1.0915473233,2.2538846103  
 H,-4.6462095646,0.1183114351,2.3305839681  
 C,5.778750004,2.3340739713,1.6799098578

|                                                                                    |                                                                                                                                                                                                                                                                                                                                                                                                                                                                                                                                                                                                                                                                                                                                                                                                                                                                                                                                                                                                                                                                                                                                                                                                                                                                                                                                                                                                                                                                                                                                                                                                                                                                                                                                                                                                                                                                                                                                                                                                                                                                                                                                                                                                                                                 |
|------------------------------------------------------------------------------------|-------------------------------------------------------------------------------------------------------------------------------------------------------------------------------------------------------------------------------------------------------------------------------------------------------------------------------------------------------------------------------------------------------------------------------------------------------------------------------------------------------------------------------------------------------------------------------------------------------------------------------------------------------------------------------------------------------------------------------------------------------------------------------------------------------------------------------------------------------------------------------------------------------------------------------------------------------------------------------------------------------------------------------------------------------------------------------------------------------------------------------------------------------------------------------------------------------------------------------------------------------------------------------------------------------------------------------------------------------------------------------------------------------------------------------------------------------------------------------------------------------------------------------------------------------------------------------------------------------------------------------------------------------------------------------------------------------------------------------------------------------------------------------------------------------------------------------------------------------------------------------------------------------------------------------------------------------------------------------------------------------------------------------------------------------------------------------------------------------------------------------------------------------------------------------------------------------------------------------------------------|
|                                                                                    | <p>H,6.7534540589,2.2157291862,2.1443924109<br/> C,1.8542719806,-4.4383096503,1.7065937588<br/> H,2.9365956809,-4.3543093528,1.6753388783<br/> H,-2.0083970439,-4.711771294,1.9746973692<br/> H,-0.5640287089,-6.1466261586,3.3952522258<br/> O,-2.9774470456,0.9602293534,-1.3139246105<br/> C,-2.4285388552,2.1333469328,-1.5667550583<br/> O,-2.4995037339,2.7439554235,-2.5977327648<br/> O,0.625525957,-3.13598611,-1.8829736159<br/> C,-0.5745741781,-2.8497591882,-1.8665658422<br/> O,-1.4009394894,-2.5336765527,-2.7345894015<br/> H,1.6844351421,7.276782623,-1.2228498713<br/> H,5.4124052278,4.2658443867,2.5622928791<br/> H,5.5889629917,-5.0046094713,-1.1880082545<br/> H,1.9037341864,-5.9430898742,3.2412386017<br/> H,-6.8238050946,-2.1462632281,-0.3090890745<br/> H,-5.2218998413,1.8739125094,3.9583653761<br/> Na,-2.8587328675,-0.8681072412,-2.77156904</p>                                                                                                                                                                                                                                                                                                                                                                                                                                                                                                                                                                                                                                                                                                                                                                                                                                                                                                                                                                                                                                                                                                                                                                                                                                                                                                                                                          |
| 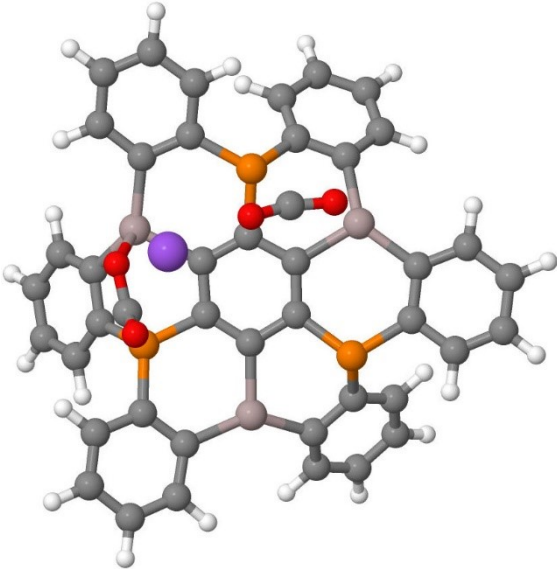 | <p><b>1CO<sub>2</sub>-Al<sub>3</sub>P<sub>3</sub>-NG-Na/CO<sub>2</sub></b><br/> <b>E=-3904.71481587H; FreqIm=1</b><br/> C,-5.4289238203,-0.6927181269,3.2566210714<br/> C,-3.9188134034,0.3728650998,1.2088971034<br/> C,-3.8122082548,-1.017776887,1.4509577817<br/> C,-4.7413441204,1.2196499675,1.9599130738<br/> C,-5.5016359985,0.6733767311,2.9909276836<br/> P,0.8256168615,-2.9564724387,-0.2800244924<br/> P,-2.8901902807,1.0519691584,-0.1180483434<br/> C,-0.9272973391,-0.7739730924,0.2030417341<br/> C,-1.9333059495,-3.8159017367,0.1537922054<br/> C,0.3967777483,-1.1942950632,0.0846946263<br/> C,-4.6162009493,2.9785634498,-0.9288030178<br/> H,-5.3051302362,2.1433125514,-1.040661493<br/> C,-3.2952684484,2.7664717685,-0.5130512763<br/> C,-1.1256441765,0.6225054254,0.0949292664<br/> C,-2.8493030124,-4.8850971191,0.1879815808<br/> H,-3.9049464669,-4.6754478229,0.3563921851<br/> C,-2.3761107932,3.8332335029,-0.3617195479<br/> C,-0.5703540681,-4.1356955278,-0.0632271492<br/> C,-0.1873455322,-5.4714968621,-0.2868995064<br/> H,0.8525384904,-5.7127740222,-0.500719472<br/> C,-2.4612045706,-6.2097548447,0.0124235411<br/> Al,-2.5045197124,-1.960197177,0.2975925394<br/> C,-5.0554338281,4.271297419,-1.1983819076<br/> H,-6.0764602618,4.4368981058,-1.5270839912<br/> C,-4.1805014299,5.3443928157,-1.0422044013<br/> C,-2.8659497156,5.1211750829,-0.6330191939<br/> H,-2.2022948742,5.977745806,-0.5334692871<br/> C,-1.1198464813,-6.5008482623,-0.2341434914<br/> H,-0.799817701,-7.526241497,-0.3937973259<br/> Al,-0.4830763344,3.4785678733,-0.0023040732<br/> C,-0.127417607,1.5716018084,-0.0970711476<br/> C,6.8964463808,1.2060010118,-0.8862794242<br/> C,4.1519069708,1.7854112298,-0.6769525959<br/> C,4.5996727211,0.457745358,-0.4743365164<br/> C,5.9801768534,0.2038020196,-0.5865474833<br/> H,6.35037668,-0.8100617949,-0.4417450319<br/> C,5.0788447641,2.7852686955,-1.0201575528<br/> H,4.7352022272,3.7988543561,-1.2209508871<br/> C,6.4376048044,2.5044484341,-1.1073144683<br/> H,7.1356421571,3.296944153,-1.3607695414<br/> P,2.4079202593,2.3866323057,-0.7305169971<br/> C,1.483466136,-0.2873082179,-0.0928109928<br/> C,3.3839103302,-2.6726141375,0.7865673464</p> |

|                                                                                     |                                                                                                                                                                                                                                                                                                                                                                                                                                                                                                                                                                                                                                                                                                                                                                                                                                                                                                                                                                                                                                                                                                                                                                                                                                                                                                                                                                                                                                                                                                                                                                                                                                                                                                                                                            |
|-------------------------------------------------------------------------------------|------------------------------------------------------------------------------------------------------------------------------------------------------------------------------------------------------------------------------------------------------------------------------------------------------------------------------------------------------------------------------------------------------------------------------------------------------------------------------------------------------------------------------------------------------------------------------------------------------------------------------------------------------------------------------------------------------------------------------------------------------------------------------------------------------------------------------------------------------------------------------------------------------------------------------------------------------------------------------------------------------------------------------------------------------------------------------------------------------------------------------------------------------------------------------------------------------------------------------------------------------------------------------------------------------------------------------------------------------------------------------------------------------------------------------------------------------------------------------------------------------------------------------------------------------------------------------------------------------------------------------------------------------------------------------------------------------------------------------------------------------------|
|                                                                                     | <p>C,3.3753662329,4.0437246135,1.4046905571<br/> H,4.3132958064,3.5005038924,1.3373367737<br/> C,2.2839757528,3.6737374227,0.6176163482<br/> C,1.207355077,1.0819847925,-0.1647073986<br/> C,4.4557044917,-3.0673407282,1.6008594537<br/> H,5.3936752524,-2.5159873441,1.5622950636<br/> C,1.0569817611,4.3828460835,0.7367526852<br/> C,2.1753137283,-3.4090731939,0.8910336332<br/> C,2.0643505862,-4.4799655916,1.780931677<br/> H,1.1308741345,-5.0262628962,1.8789376994<br/> C,4.3569448814,-4.1524036817,2.4728015739<br/> Al,3.3206520138,-0.9428531993,-0.1093702646<br/> C,3.2747581358,5.1161164921,2.2953094721<br/> H,4.134415179,5.388320804,2.901007185<br/> C,2.0867378458,5.8291285628,2.4115034695<br/> C,0.9836037704,5.4467087795,1.6467577886<br/> H,0.0513142886,5.9967187728,1.7651138489<br/> C,3.1558532943,-4.8479856684,2.568919731<br/> H,3.059020186,-5.6777608492,3.2629864357<br/> C,-4.5943220831,-1.517640487,2.4994682629<br/> H,-4.5535172267,-2.5778654147,2.739648546<br/> H,-4.7906054935,2.2858139388,1.7543817701<br/> H,-6.1450721035,1.3148242507,3.5847639562<br/> O,0.4749232091,-2.0038893993,-3.2042215732<br/> C,1.5365695522,-2.0189440381,-2.688078695<br/> O,2.6791521986,-1.8534214344,-2.4833151433<br/> O,-3.1622370252,-1.3241521953,-1.3969524379<br/> C,-3.1398067369,-0.0502300909,-1.6408729733<br/> O,-3.0604819625,0.4298507068,-2.7601784964<br/> H,7.9553294919,0.9780234143,-0.9627057009<br/> H,5.2076675688,-4.4436969196,3.0815980363<br/> H,-3.1965018221,-7.0079167802,0.0530912251<br/> H,-6.023057683,-1.1167512074,4.0610046475<br/> H,-4.5208102728,6.3551078336,-1.2467048072<br/> H,2.0146733273,6.6684718939,3.0964699044<br/> Na,-1.8048803752,-1.5552666335,-3.2908903843</p> |
| 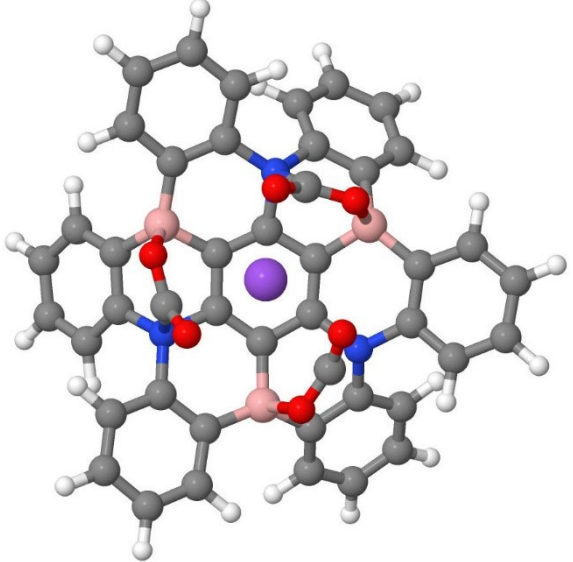 | <p><b>2CO<sub>2</sub>-B<sub>3</sub>N<sub>3</sub>-NG-Na/CO<sub>2</sub></b><br/> <b>E=-2580.79374829H; FreqIm=1</b><br/> C,-5.4421888587,1.0842272066,2.5271915517<br/> C,-3.2635888368,1.6328963873,0.8943043787<br/> C,-3.7408360421,0.3094069026,0.9759834148<br/> C,-3.8335897959,2.6613810499,1.6370141416<br/> C,-4.929902739,2.3762623037,2.4516067557<br/> N,-0.5553355647,-2.7055883201,-0.0432217991<br/> N,-2.0715199819,1.8598241452,0.0350227187<br/> C,-1.3565506518,-0.3885515914,0.4377889505<br/> C,-3.066539438,-2.2643923446,-0.1164925683<br/> C,-0.3307214337,-1.2923653584,0.4192895851<br/> C,-2.7930108704,4.0196248365,-0.7976267873<br/> H,-3.7824004319,3.5798794187,-0.8949705878<br/> C,-1.7340994251,3.2567467457,-0.2950241722<br/> C,-0.9866023301,0.9664137343,0.4305311217<br/> C,-4.3340394461,-2.7947867572,-0.4091811552<br/> H,-5.1993768777,-2.1441423598,-0.3092234901<br/> C,-0.4286011813,3.7759525975,-0.2303642055<br/> C,-1.9727095448,-3.127287195,-0.281273975<br/> C,-2.118396804,-4.423776968,-0.7709866398<br/> H,-1.2469294066,-5.0547930734,-0.9261969637<br/> C,-4.5053701257,-4.0978306946,-0.8584212598<br/> C,-2.5865930391,5.3417774284,-1.1653908614<br/> H,-3.4170529831,5.9273097183,-1.5470016269<br/> C,-1.3146590406,5.9054339022,-1.0513744961<br/> C,-0.2604317146,5.1189393492,-0.6060917986</p>                                                                                                                                                                                                                                                                                                                                                                                           |



|  |                                                                                                                                                                                                                                                                                                                                                                                                                                                                                                                                                                                                                                                                                                                                                                                                                                                                                                                                                                                                                                                                                                                                                                                                                                                                                                                                                                                                                                                                                                                                                                                                                                                                                                                                                                                                                                                                                                                                                                                                                                                                                                                                                                                                                                                                                                                                                                                                                                                                                                                                                                                                                                                                                                                                                                                    |
|--|------------------------------------------------------------------------------------------------------------------------------------------------------------------------------------------------------------------------------------------------------------------------------------------------------------------------------------------------------------------------------------------------------------------------------------------------------------------------------------------------------------------------------------------------------------------------------------------------------------------------------------------------------------------------------------------------------------------------------------------------------------------------------------------------------------------------------------------------------------------------------------------------------------------------------------------------------------------------------------------------------------------------------------------------------------------------------------------------------------------------------------------------------------------------------------------------------------------------------------------------------------------------------------------------------------------------------------------------------------------------------------------------------------------------------------------------------------------------------------------------------------------------------------------------------------------------------------------------------------------------------------------------------------------------------------------------------------------------------------------------------------------------------------------------------------------------------------------------------------------------------------------------------------------------------------------------------------------------------------------------------------------------------------------------------------------------------------------------------------------------------------------------------------------------------------------------------------------------------------------------------------------------------------------------------------------------------------------------------------------------------------------------------------------------------------------------------------------------------------------------------------------------------------------------------------------------------------------------------------------------------------------------------------------------------------------------------------------------------------------------------------------------------------|
|  | <p> H,0.7423091001,5.5397701671,-0.571323268<br/> C,-3.3881436168,-4.911299669,-1.0522848989<br/> H,-3.5014359364,-5.9228625433,-1.4286277179<br/> C,0.3181568182,1.3832182471,0.4151344643<br/> C,5.8128896605,-1.8155160664,-0.8883654517<br/> C,3.7045505083,-0.1228253403,-0.2734245058<br/> C,3.4783629643,-1.5058543732,-0.2178756201<br/> C,4.5749674955,-2.3289787163,-0.522399153<br/> H,4.4307607216,-3.4068072223,-0.4953777456<br/> C,4.9242284614,0.4136829936,-0.6861969225<br/> H,5.0512985287,1.4897287939,-0.771131257<br/> C,5.9822549461,-0.4339684429,-0.9851921044<br/> H,6.9325343848,-0.0143256686,-1.2991254839<br/> N,2.6302866242,0.8956757051,-0.0254886672<br/> C,1.0242623927,-0.9581223037,0.4128130781<br/> C,1.6225130214,-3.368954262,0.9101420839<br/> C,4.114248606,1.9364089187,1.7501517833<br/> H,4.7738245065,1.0771764264,1.7384978873<br/> C,3.0087925415,2.030257035,0.9164462048<br/> C,1.2889477588,0.3805225921,0.4099046381<br/> C,2.3888820283,-4.1450201713,1.7778591978<br/> H,3.458293679,-3.9631474275,1.8489038096<br/> C,2.0981997468,3.09514649,0.9638389183<br/> C,0.2461762759,-3.627882174,0.8642354167<br/> C,-0.379873463,-4.5697612652,1.6682992524<br/> H,-1.4529268691,-4.7179499075,1.6551058694<br/> C,1.7970403689,-5.1280337532,2.5724708687<br/> C,4.3548977677,2.9904150591,2.6339644586<br/> H,5.2155308714,2.9397164513,3.2930207803<br/> C,3.4985766641,4.0870706879,2.6795875309<br/> C,2.3712577781,4.1290706549,1.8577590581<br/> H,1.6806345446,4.9658895032,1.9261762888<br/> C,0.420400617,-5.3289390855,2.5246557201<br/> H,-0.046867981,-6.073248128,3.1611931526<br/> C,-4.8398055438,0.0593538836,1.7993314201<br/> H,-5.2134602904,-0.9574539821,1.8909925965<br/> H,-3.4327261879,3.6676289092,1.6059816987<br/> H,-5.3732010718,3.1749691794,3.0378167443<br/> O,-0.5828649471,-2.222343599,-2.3966376803<br/> C,0.151837709,-2.5104052097,-1.4827355142<br/> O,1.4120962994,-2.5315374418,-1.4259144712<br/> O,1.5316788224,2.5433242854,-1.3937532015<br/> C,2.1422708499,1.4485859191,-1.4663559313<br/> O,2.2984556018,0.687472255,-2.3931463<br/> O,-3.0670899614,0.0640975608,-1.4860804206<br/> C,-2.2653704245,0.9604768296,-1.6500575482<br/> O,-1.4635704643,1.4093045674,-2.4099533128<br/> H,6.6363799988,-2.483618761,-1.1205053238<br/> H,2.4070779079,-5.7241260188,3.2440540053<br/> H,-5.498821602,-4.4746327821,-1.0801033351<br/> H,-6.2940549079,0.8728955826,3.1658010872<br/> H,-1.1475079643,6.9397642998,-1.3352643502<br/> H,3.6976284319,4.8996750724,3.3714226881<br/> B,-2.8617411308,-0.7405663275,0.2040988625<br/> B,2.0328221466,-2.1123786108,0.019705758<br/> B,0.8180398289,2.8398173587,0.0475652128<br/> Na,0.2766039471,-0.1128052387,-3.2240005819 </p> |
|--|------------------------------------------------------------------------------------------------------------------------------------------------------------------------------------------------------------------------------------------------------------------------------------------------------------------------------------------------------------------------------------------------------------------------------------------------------------------------------------------------------------------------------------------------------------------------------------------------------------------------------------------------------------------------------------------------------------------------------------------------------------------------------------------------------------------------------------------------------------------------------------------------------------------------------------------------------------------------------------------------------------------------------------------------------------------------------------------------------------------------------------------------------------------------------------------------------------------------------------------------------------------------------------------------------------------------------------------------------------------------------------------------------------------------------------------------------------------------------------------------------------------------------------------------------------------------------------------------------------------------------------------------------------------------------------------------------------------------------------------------------------------------------------------------------------------------------------------------------------------------------------------------------------------------------------------------------------------------------------------------------------------------------------------------------------------------------------------------------------------------------------------------------------------------------------------------------------------------------------------------------------------------------------------------------------------------------------------------------------------------------------------------------------------------------------------------------------------------------------------------------------------------------------------------------------------------------------------------------------------------------------------------------------------------------------------------------------------------------------------------------------------------------------|

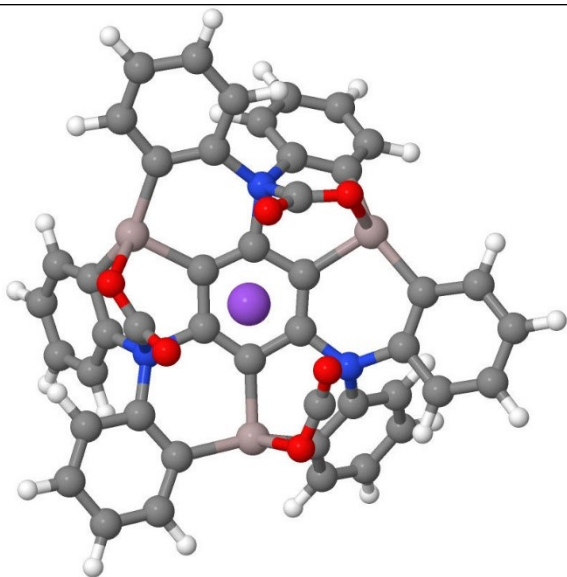

**2CO<sub>2</sub>-Al<sub>3</sub>N<sub>3</sub>-NG-Na/CO<sub>2</sub>**

**E=-3233.45380624H; FreqIm=1**

C,-1.0000293014,5.0600498774,3.1569543259  
 C,-0.0430815308,3.6069196904,0.9978361909  
 C,-1.4333221178,3.6442864562,1.2105870825  
 C,0.8593811656,4.2328928659,1.8563936552  
 C,0.3698165684,4.9608492155,2.9392294175  
 N,-2.7015550899,-0.935701282,-0.1312639025  
 N,0.552497755,2.7700118138,-0.1521930546  
 C,-1.0430909023,0.9564112094,0.1500628565  
 C,-3.9305244451,1.3685911817,-0.4046080857  
 C,-1.2960300921,-0.3879467696,0.1477669556  
 C,1.8174185689,4.6225636908,-1.0208277989  
 H,0.8409012748,5.0929884772,-1.1232105201  
 C,1.922349871,3.3245147659,-0.5137193666  
 C,0.3225255245,1.2816957016,0.1584929185  
 C,-5.1639850951,1.954898373,-0.7612809591  
 H,-5.2646616235,3.0364291145,-0.7026272922  
 C,3.1639300731,2.692226049,-0.3444804444  
 C,-3.870672575,-0.0312744195,-0.4996021498  
 C,-4.958478361,-0.7874885266,-0.9462382838  
 H,-4.8854100711,-1.8724902796,-0.9970024446  
 C,-6.2586061202,1.2184583876,-1.194545307  
 Al,-2.3281961444,2.4092021936,-0.0090976335  
 C,2.9570082928,5.3345493094,-1.3641862045  
 H,2.8621202941,6.3417565945,-1.7569412244  
 C,4.211998476,4.7517262616,-1.1920381731  
 C,4.2963154345,3.4571612878,-0.6962117191  
 H,5.2830911868,3.014110464,-0.5812056642  
 C,-6.1482255418,-0.1676772376,-1.2967680317  
 H,-6.9842358386,-0.767526494,-1.6417907553  
 Al,3.2400043065,0.801355377,0.1184909912  
 C,1.3547014353,0.3844509677,0.1842883345  
 C,2.0407432117,-5.939386548,-1.4073022605  
 C,1.9280671389,-3.2978290445,-0.4713595216  
 C,0.7578564839,-4.0864176228,-0.4156036751  
 C,0.8642166314,-5.4092068004,-0.8967176396  
 H,-0.0169773232,-6.0469803595,-0.872674834  
 C,3.1148864912,-3.8262971821,-1.0032434032  
 H,4.0116737909,-3.2089606382,-1.0246779338  
 C,3.1763597597,-5.1308670705,-1.4664670019  
 H,4.1081386968,-5.5139578041,-1.8709799039  
 N,2.107292309,-1.9064189161,-0.0028385347  
 C,-0.328470122,-1.4018742437,0.176580981  
 C,-2.4493542562,-3.0617450998,1.2774979974  
 C,3.3179322521,-2.9099981503,1.9118996972  
 H,2.7137274693,-3.8025759265,1.7870846365  
 C,3.1434519383,-1.8100724982,1.0681690708  
 C,0.9825394216,-0.9799355407,0.196426279  
 C,-2.8660519456,-3.796380024,2.3941891307  
 H,-2.3889737115,-4.7497858727,2.606532494  
 C,3.9091219633,-0.6352744529,1.236635109  
 C,-3.1101389744,-1.8407595442,1.0485258325  
 C,-4.083572328,-1.3444433745,1.9141598985  
 H,-4.5611217874,-0.386174407,1.7475266199  
 C,-3.8617141829,-3.3397820259,3.2555769681  
 Al,-0.9389066433,-3.247164484,0.0462534199  
 C,4.2778950954,-2.866299398,2.9190856664  
 H,4.4030949759,-3.7253918133,3.5709431684  
 C,5.0674072705,-1.7323928624,3.0887566492  
 C,4.8687522445,-0.6326817498,2.258004252  
 H,5.4764818918,0.2553666589,2.414591068  
 C,-4.4556700455,-2.1043221937,3.0213343804

|                                                                                    |                                                                                                                                                                                                                                                                                                                                                                                                                                                                                                                                                                                                                                                                                                                                                                                                                                                                                                                                                                                                                                                                                                                                                                                                                                                                                                                                                                                                                                                                                                                                                                                                                                                                                                                                                                                                                                                                                                                                                                                                                                                                                    |
|------------------------------------------------------------------------------------|------------------------------------------------------------------------------------------------------------------------------------------------------------------------------------------------------------------------------------------------------------------------------------------------------------------------------------------------------------------------------------------------------------------------------------------------------------------------------------------------------------------------------------------------------------------------------------------------------------------------------------------------------------------------------------------------------------------------------------------------------------------------------------------------------------------------------------------------------------------------------------------------------------------------------------------------------------------------------------------------------------------------------------------------------------------------------------------------------------------------------------------------------------------------------------------------------------------------------------------------------------------------------------------------------------------------------------------------------------------------------------------------------------------------------------------------------------------------------------------------------------------------------------------------------------------------------------------------------------------------------------------------------------------------------------------------------------------------------------------------------------------------------------------------------------------------------------------------------------------------------------------------------------------------------------------------------------------------------------------------------------------------------------------------------------------------------------|
|                                                                                    | <p>H,-5.2152361554,-1.7202407707,3.6947511184<br/> C,-1.8794341115,4.3978337756,2.3027392669<br/> H,-2.9464444407,4.4602928024,2.5008190359<br/> H,1.9303108962,4.1719837525,1.7038167407<br/> H,1.0716582022,5.4498873484,3.6072025329<br/> O,-2.2647410345,-0.8985699305,-2.4665187098<br/> C,-2.3375311968,-1.674406904,-1.5402135891<br/> O,-2.0794928192,-2.8942466235,-1.4522278639<br/> O,3.5553350345,-0.2571244439,-1.5873515161<br/> C,2.6099982288,-0.9569489837,-1.8490554913<br/> O,1.7713141401,-1.3306987133,-2.5809483315<br/> O,-1.4353497149,3.1755167944,-1.5137365721<br/> C,-0.2479462263,2.7771651881,-1.5694228256<br/> O,0.387684616,2.2787740538,-2.4706855735<br/> H,2.0746639442,-6.964275806,-1.7633718872<br/> H,-4.1598093165,-3.9359916775,4.1126162295<br/> H,-7.1863715245,1.7167881584,-1.4576544209<br/> H,-1.3801768304,5.6360147536,3.9951121567<br/> H,5.1123786689,5.3009991739,-1.4486665934<br/> H,5.8217350548,-1.7010929148,3.8688860243<br/> Na,-0.2679605081,0.0969646387,-2.9012820548</p>                                                                                                                                                                                                                                                                                                                                                                                                                                                                                                                                                                                                                                                                                                                                                                                                                                                                                                                                                                                                                                           |
| 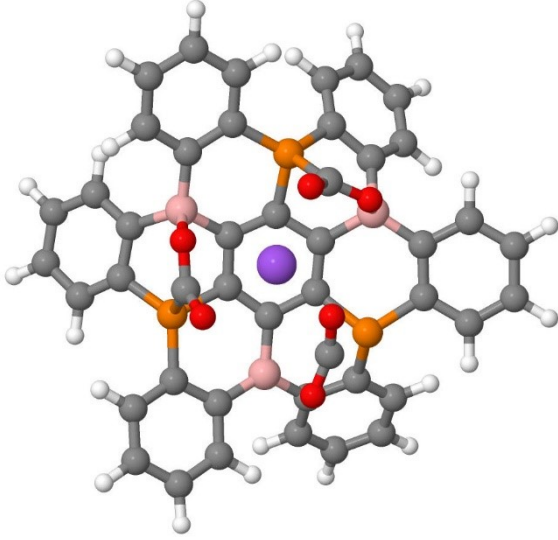 | <p><b>2CO<sub>2</sub>-B<sub>3</sub>P<sub>3</sub>-NG-Na/CO<sub>2</sub></b><br/> <b>E=-3440.59556338H; FreqIm=1</b><br/> C,-4.0332496564,4.3967457623,-2.3577013411<br/> C,-3.4585849124,2.1830218335,-0.7584169764<br/> C,-2.4323462758,3.1338978938,-1.0116044014<br/> C,-4.7418474031,2.3581312325,-1.2718781183<br/> C,-5.0257055749,3.4629844255,-2.0756037388<br/> P,2.1057493151,2.2020532721,-0.0804550509<br/> P,-2.9816703435,0.787287525,0.3094890515<br/> C,-0.4877640885,1.3787885787,-0.5558752857<br/> C,0.0366598738,4.0299762109,-0.1148658501<br/> C,0.8600538271,1.028779035,-0.5957656925<br/> C,-5.4159293068,-0.4478101892,0.6516340085<br/> H,-5.8008811213,0.5597686435,0.7898161031<br/> C,-4.0682427172,-0.6557769837,0.3183708243<br/> C,-1.4120071572,0.3110963448,-0.4345197433<br/> C,-0.4543540539,5.309189197,0.1869479898<br/> H,-1.5217653734,5.4921414469,0.1123999622<br/> C,-3.5199788722,-1.9555011515,0.2322188075<br/> C,1.429250354,3.8408240517,0.0864261487<br/> C,2.2749829963,4.8632367851,0.5221544057<br/> H,3.3346704935,4.6763013787,0.6823233988<br/> C,0.3791147857,6.3410387164,0.6184287476<br/> B,-0.9632338367,2.8819928774,-0.5325326594<br/> C,-6.2641553896,-1.5300153543,0.8485045643<br/> H,-7.3087577613,-1.3639111725,1.0927298512<br/> C,-5.7516231536,-2.8237603555,0.7657360874<br/> C,-4.4041567774,-3.0186955237,0.4777040582<br/> H,-4.0147036405,-4.0341910055,0.4607779158<br/> C,1.7460086478,6.1267096472,0.7745407065<br/> H,2.3947251232,6.9282962391,1.1127046218<br/> B,-1.9649485265,-2.2863145518,0.0000119981<br/> C,-1.0168119033,-1.0215312618,-0.4194800356<br/> C,5.2134795614,-3.5564195021,0.7253762739<br/> C,2.5402767232,-3.159649125,0.1641214578<br/> C,3.3861578238,-2.0272088053,0.1488137452<br/> C,4.7326445245,-2.2773073576,0.4550610499<br/> H,5.4232200148,-1.438221843,0.4950537175<br/> C,3.0044821421,-4.453295961,0.4445826039<br/> H,2.3150676413,-5.2945153058,0.4714056557<br/> C,4.3521224195,-4.6537101815,0.7114324506<br/> H,4.7232545343,-5.6508540611,0.924705882</p> |

|                                                                                     |                                                                                                                                                                                                                                                                                                                                                                                                                                                                                                                                                                                                                                                                                                                                                                                                                                                                                                                                                                                                                                                                                                                                                                                                                                                                                                                                                                                                                                                                                                                                                                                                                                                                                                                                                                                                                                                                                                                                                                                                                                                                       |
|-------------------------------------------------------------------------------------|-----------------------------------------------------------------------------------------------------------------------------------------------------------------------------------------------------------------------------------------------------------------------------------------------------------------------------------------------------------------------------------------------------------------------------------------------------------------------------------------------------------------------------------------------------------------------------------------------------------------------------------------------------------------------------------------------------------------------------------------------------------------------------------------------------------------------------------------------------------------------------------------------------------------------------------------------------------------------------------------------------------------------------------------------------------------------------------------------------------------------------------------------------------------------------------------------------------------------------------------------------------------------------------------------------------------------------------------------------------------------------------------------------------------------------------------------------------------------------------------------------------------------------------------------------------------------------------------------------------------------------------------------------------------------------------------------------------------------------------------------------------------------------------------------------------------------------------------------------------------------------------------------------------------------------------------------------------------------------------------------------------------------------------------------------------------------|
|                                                                                     | <p>P,0.7828228402,-2.9313925237,-0.009525532<br/> C,1.3530666449,-0.2873229692,-0.5358790561<br/> C,3.8712154446,0.4588324537,-0.9866304023<br/> C,0.1989818494,-5.0550967966,-1.7856538432<br/> H,1.2465704731,-5.3446192137,-1.7907091232<br/> C,-0.2565189681,-4.0038192039,-0.9901425826<br/> C,0.3703178535,-1.262025268,-0.5161127387<br/> C,4.9332372709,0.0464478867,-1.7975275181<br/> H,5.184793655,-1.0092231775,-1.8542859409<br/> C,-1.5970285948,-3.5569540906,-0.9572773503<br/> C,3.5879210959,1.8439214593,-1.0108533293<br/> C,4.3095900862,2.7779186252,-1.7531792482<br/> H,4.038714103,3.8307132783,-1.7482226453<br/> C,5.6755119194,0.9610347158,-2.5482017512<br/> B,2.9083490965,-0.5034904124,-0.0902322539<br/> C,-0.7211731249,-5.7114387401,-2.5979322384<br/> H,-0.3995959216,-6.5353619858,-3.2267813565<br/> C,-2.0503056942,-5.2881944485,-2.6138463253<br/> C,-2.4777173804,-4.227383253,-1.8129447447<br/> H,-3.5162151456,-3.9117300252,-1.8633493296<br/> C,5.3767986123,2.3230551076,-2.522889396<br/> H,5.9599257437,3.0241307541,-3.1111058141<br/> C,-2.7556540419,4.2305975431,-1.826360422<br/> H,-1.984492898,4.9551101479,-2.0768245086<br/> H,-5.5168657915,1.6208752095,-1.0884573783<br/> H,-6.0213595554,3.5808992415,-2.4923573654<br/> O,1.8864497046,1.7108062916,2.6130142557<br/> C,2.3491155495,1.2960326442,1.5672239211<br/> O,2.8708233762,0.126345432,1.3858875419<br/> O,-1.3963879789,-2.6447781025,1.4632660252<br/> C,-0.1308534421,-2.7079641077,1.6367847618<br/> O,0.4982161181,-2.4852912305,2.6610176555<br/> O,-1.778973621,2.698807229,2.0965117991<br/> C,-1.7645571888,1.5141380959,2.1808176448<br/> O,-1.3238739366,0.5127102702,2.6792722641<br/> H,6.2649589667,-3.69888715,0.9570184575<br/> H,6.4958111166,0.6052158301,-3.1646654036<br/> H,-0.0445443274,7.3144870606,0.8455331354<br/> H,-4.2504929316,5.2489992539,-2.9939408691<br/> H,-6.3973868796,-3.6776977192,0.9478052282<br/> H,-2.762592332,-5.7881462686,-3.263766295<br/> Na,0.7285652785,-0.3068622482,3.3261538776</p> |
| 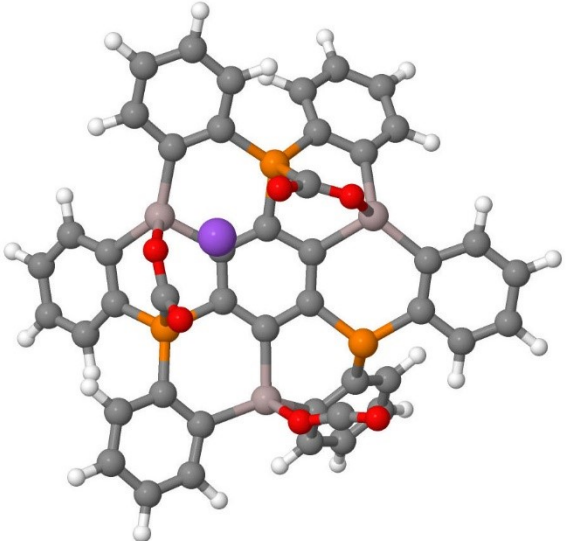 | <p><b>2CO<sub>2</sub>-Al<sub>3</sub>P<sub>3</sub>-NG-Na/CO<sub>2</sub></b><br/> <b>E=-4093.29732378H; FreqIm=1</b><br/> C,5.92616,0.049413,2.916704<br/> C,4.028706,-0.815465,1.100246<br/> C,4.18917,0.580944,1.280635<br/> C,4.77594,-1.759687,1.813046<br/> C,5.730966,-1.31636,2.724927<br/> P,-0.229545,3.112768,-0.034737<br/> P,2.749382,-1.377722,-0.06183<br/> C,1.158685,0.734798,0.467767<br/> C,2.584582,3.585734,0.004324<br/> C,-0.0896,1.343187,0.402064<br/> C,4.118413,-3.568072,-0.855465<br/> H,4.931348,-2.856007,-0.986586<br/> C,2.852917,-3.141896,-0.420947<br/> C,1.118204,-0.675329,0.351343<br/> C,3.641009,4.499821,-0.150879<br/> H,4.666193,4.155486,-0.025919<br/> C,1.768386,-4.03537,-0.25782<br/> C,1.279671,4.105071,-0.16561<br/> C,1.056192,5.447532,-0.511774</p>                                                                                                                                                                                                                                                                                                                                                                                                                                                                                                                                                                                                                                                                                                                                                                                                                                                                                                                                                                                                                                                                                                                                                                                                                                                               |

|  |                                 |
|--|---------------------------------|
|  | H,0.04585,5.821982,-0.662807    |
|  | C,3.430125,5.84024,-0.469738    |
|  | Al,2.899671,1.663428,0.252803   |
|  | C,4.340268,-4.914594,-1.116133  |
|  | H,5.316055,-5.246886,-1.455711  |
|  | C,3.302619,-5.828234,-0.935611  |
|  | C,2.046823,-5.387392,-0.521984  |
|  | H,1.253278,-6.124809,-0.414792  |
|  | C,2.133513,6.313464,-0.662764   |
|  | H,1.958623,7.351185,-0.928624   |
|  | Al,-0.081119,-3.406242,0.024539 |
|  | C,-0.03771,-1.437862,0.20336    |
|  | C,-6.848474,0.108216,-0.809288  |
|  | C,-4.29509,-0.923091,-0.328439  |
|  | C,-4.441181,0.477326,-0.492294  |
|  | C,-5.74378,0.952814,-0.726546   |
|  | H,-5.904944,2.02239,-0.854977   |
|  | C,-5.401488,-1.780838,-0.44375  |
|  | H,-5.271619,-2.858538,-0.362879 |
|  | C,-6.673747,-1.266888,-0.67026  |
|  | H,-7.521474,-1.94076,-0.748579  |
|  | P,-2.698783,-1.796035,-0.191865 |
|  | C,-1.327863,0.672042,0.259221   |
|  | C,-2.842037,3.369673,0.781642   |
|  | C,-3.761055,-3.185371,2.057271  |
|  | H,-4.60485,-2.500891,2.027606   |
|  | C,-2.70512,-3.053152,1.154224   |
|  | C,-1.263187,-0.720148,0.210837  |
|  | C,-3.848272,3.985147,1.537936   |
|  | H,-4.862674,3.594198,1.496105   |
|  | C,-1.582427,-3.923671,1.189496  |
|  | C,-1.548488,3.930535,0.898504   |
|  | C,-1.261072,5.017965,1.732271   |
|  | H,-0.250967,5.407482,1.825168   |
|  | C,-3.588559,5.084689,2.357262   |
|  | Al,-2.935204,1.710145,-0.299716 |
|  | C,-3.726388,-4.199451,3.015552  |
|  | H,-4.546734,-4.301588,3.719832  |
|  | C,-2.642108,-5.070057,3.071274  |
|  | C,-1.581407,-4.918915,2.175249  |
|  | H,-0.736585,-5.601374,2.251506  |
|  | C,-2.295897,5.596432,2.461522   |
|  | H,-2.090262,6.440378,3.1125     |
|  | C,5.160091,0.977048,2.208042    |
|  | H,5.325512,2.036399,2.392017    |
|  | H,4.617903,-2.825223,1.671477   |
|  | H,6.316438,-2.038832,3.284741   |
|  | O,0.007058,2.659235,-2.675606   |
|  | C,-0.85002,2.706192,-1.796      |
|  | O,-2.071176,2.361762,-1.874468  |
|  | O,-0.807471,-3.656877,-1.776519 |
|  | C,-1.854523,-3.260569,-2.252908 |
|  | O,-2.648916,-3.184755,-3.095165 |
|  | O,3.178966,0.912124,-1.467505   |
|  | C,2.941785,-0.354774,-1.654906  |
|  | O,2.652967,-0.834851,-2.73555   |
|  | H,-7.837501,0.517542,-0.99279   |
|  | H,-4.394737,5.538935,2.926201   |
|  | H,4.275435,6.513471,-0.578208   |
|  | H,6.67289,0.393122,3.626623     |
|  | H,3.470522,-6.883437,-1.130336  |
|  | H,-2.618162,-5.861456,3.814734  |
|  | Na,1.750121,1.407916,-3.289099  |



**Table S8:** Geometries, energies (in Hartree) and Cartesian coordinates (in Å) of the adducts with a Na<sup>+</sup> cation in vacuum. Level of theory: M06-2X/6-311++G\*//M06-2X/6-31+G\*

|                                                                                   |                                                                                                                                                                                                                                                                                                                                                                                                                                                                                                                                                                                                                                                                                                                                                                                                                                                                                                                                                                                                                                                                                                                                                                                                                                                                                                                                                                                                                                                                                                                                                                                                                                                                                                                                                                                                                                                                                                                                                                                                                                                                                                                                                                                                                                                                                                                                                                                                                                                                                                                                                                                                                                                                                                                                                                                                                                                                                                                                                                                                                                                                                                                                                                                                                                                                                                                                                                                                                                                                 |
|-----------------------------------------------------------------------------------|-----------------------------------------------------------------------------------------------------------------------------------------------------------------------------------------------------------------------------------------------------------------------------------------------------------------------------------------------------------------------------------------------------------------------------------------------------------------------------------------------------------------------------------------------------------------------------------------------------------------------------------------------------------------------------------------------------------------------------------------------------------------------------------------------------------------------------------------------------------------------------------------------------------------------------------------------------------------------------------------------------------------------------------------------------------------------------------------------------------------------------------------------------------------------------------------------------------------------------------------------------------------------------------------------------------------------------------------------------------------------------------------------------------------------------------------------------------------------------------------------------------------------------------------------------------------------------------------------------------------------------------------------------------------------------------------------------------------------------------------------------------------------------------------------------------------------------------------------------------------------------------------------------------------------------------------------------------------------------------------------------------------------------------------------------------------------------------------------------------------------------------------------------------------------------------------------------------------------------------------------------------------------------------------------------------------------------------------------------------------------------------------------------------------------------------------------------------------------------------------------------------------------------------------------------------------------------------------------------------------------------------------------------------------------------------------------------------------------------------------------------------------------------------------------------------------------------------------------------------------------------------------------------------------------------------------------------------------------------------------------------------------------------------------------------------------------------------------------------------------------------------------------------------------------------------------------------------------------------------------------------------------------------------------------------------------------------------------------------------------------------------------------------------------------------------------------------------------|
| 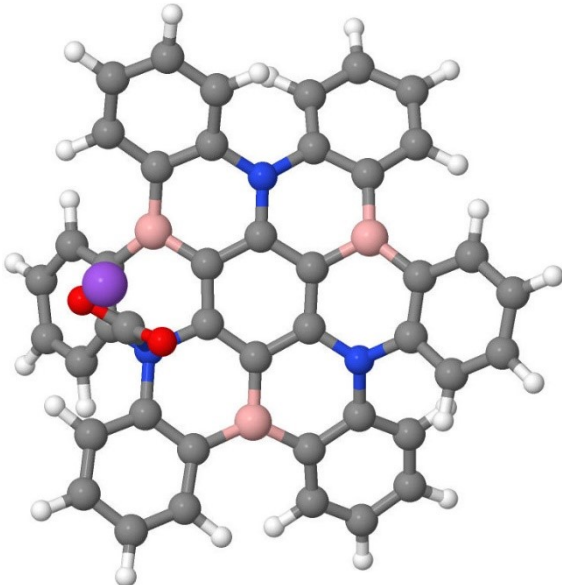 | <p><b>B<sub>3</sub>N<sub>3</sub>-NG-Na inter</b><br/> <b>E=-2203.83090491H; FreqIm=0</b></p> <p>C,0.7028823498,5.8978358965,1.7828489158<br/>           C,1.5199225153,3.5013169006,0.563000796<br/>           C,0.1415707564,3.8233145721,0.6143654557<br/>           C,2.462439076,4.358358288,1.1534556552<br/>           C,2.0553698035,5.5429029833,1.7463923915<br/>           N,-2.5244309278,0.2981153087,-0.0216252499<br/>           N,1.9716542202,2.2709895552,-0.0027010268<br/>           C,-0.2596295714,1.3548453113,0.0988092536<br/>           C,-2.388295545,2.8283780005,-0.100224179<br/>           C,-1.0335427655,0.2146698363,0.1086743725<br/>           C,3.820897694,3.3061060793,-1.211692475<br/>           H,3.259214912,4.232558428,-1.2572262508<br/>           C,3.2739999671,2.1761238226,-0.5811852278<br/>           C,1.1514258814,1.1563974451,0.036648435<br/>           C,-3.0613003116,4.028136693,-0.4000123399<br/>           H,-2.5031905632,4.9587200602,-0.3752648443<br/>           C,3.969175417,0.9460652424,-0.5993172758<br/>           C,-3.1326981231,1.6499061171,-0.2124908757<br/>           C,-4.4733268232,1.648127703,-0.5984151544<br/>           H,-5.0209491922,0.7124067312,-0.679373199<br/>           C,-4.3987944779,4.0523261441,-0.7710879393<br/>           B,-0.8616923461,2.7435952828,0.18718383<br/>           C,5.0688167955,3.2333364804,-1.8091994234<br/>           H,5.4709849306,4.1132437708,-2.3023791211<br/>           C,5.7932036221,2.0361617341,-1.8076919583<br/>           C,5.2336258353,0.9137307562,-1.2220798075<br/>           H,5.7618954874,-0.0341098373,-1.2765689885<br/>           C,-5.1083914546,2.854522258,-0.8661977414<br/>           H,-6.1533711286,2.855391998,-1.1599391948<br/>           B,3.2193161908,-0.3109217072,-0.1223355669<br/>           C,1.7185177969,-0.1311727257,-0.0151146244<br/>           C,-1.0378571999,-5.9068987821,-0.7217105697<br/>           C,0.5595188003,-3.6532473751,-0.1821891146<br/>           C,-0.8258985475,-3.6217504096,0.1101759705<br/>           C,-1.595489746,-4.772457291,-0.1560170116<br/>           H,-2.6609724644,-4.7422738347,0.0613810341<br/>           C,1.11163451,-4.7859297014,-0.8022284665<br/>           H,2.1576058035,-4.7931681965,-1.0888584716<br/>           C,0.3203239368,-5.8948581474,-1.0625973054<br/>           H,0.7665250783,-6.7584173536,-1.5470430324<br/>           N,1.3952083155,-2.5317209515,0.0981641377<br/>           C,-0.541452661,-1.0895337817,0.1401220425<br/>           C,-2.7577904344,-1.8557489726,1.1880844915<br/>           C,3.1305725259,-3.9289038908,1.1084596905<br/>           H,2.3868618815,-4.6853783627,1.3303398267<br/>           C,2.7636422879,-2.732914064,0.4705929211<br/>           C,0.861518509,-1.2525162576,0.0675340539<br/>           C,-3.3868711293,-2.6438581515,2.1536437215<br/>           H,-3.057416316,-3.6709203623,2.2894065721<br/>           C,3.7202068539,-1.7090342671,0.2850804738<br/>           C,-3.1862272051,-0.5222015279,1.0568698421<br/>           C,-4.1568625668,0.0231913882,1.8808284161<br/>           H,-4.4513572418,1.0625184912,1.8095347103<br/>           C,-4.3917420675,-2.1262317024,2.9733321034<br/>           B,-1.439923,-2.2663629013,0.4687954052<br/>           C,4.4450326365,-4.1381874351,1.496924093<br/>           H,4.7052895954,-5.0652372829,1.9989563219</p> |
|-----------------------------------------------------------------------------------|-----------------------------------------------------------------------------------------------------------------------------------------------------------------------------------------------------------------------------------------------------------------------------------------------------------------------------------------------------------------------------------------------------------------------------------------------------------------------------------------------------------------------------------------------------------------------------------------------------------------------------------------------------------------------------------------------------------------------------------------------------------------------------------------------------------------------------------------------------------------------------------------------------------------------------------------------------------------------------------------------------------------------------------------------------------------------------------------------------------------------------------------------------------------------------------------------------------------------------------------------------------------------------------------------------------------------------------------------------------------------------------------------------------------------------------------------------------------------------------------------------------------------------------------------------------------------------------------------------------------------------------------------------------------------------------------------------------------------------------------------------------------------------------------------------------------------------------------------------------------------------------------------------------------------------------------------------------------------------------------------------------------------------------------------------------------------------------------------------------------------------------------------------------------------------------------------------------------------------------------------------------------------------------------------------------------------------------------------------------------------------------------------------------------------------------------------------------------------------------------------------------------------------------------------------------------------------------------------------------------------------------------------------------------------------------------------------------------------------------------------------------------------------------------------------------------------------------------------------------------------------------------------------------------------------------------------------------------------------------------------------------------------------------------------------------------------------------------------------------------------------------------------------------------------------------------------------------------------------------------------------------------------------------------------------------------------------------------------------------------------------------------------------------------------------------------------------------------|

|                                                                                    |                                                                                                                                                                                                                                                                                                                                                                                                                                                                                                                                                                                                                                                                                                                                                                                                                                                                                                                                                                                                                                                                                                                                                                                                                                                                                                                                                                                                                                                                                                                                                                                                                                                                                                                                                                                                                                                                                                                                                                                                                                                                                                                                                                          |
|------------------------------------------------------------------------------------|--------------------------------------------------------------------------------------------------------------------------------------------------------------------------------------------------------------------------------------------------------------------------------------------------------------------------------------------------------------------------------------------------------------------------------------------------------------------------------------------------------------------------------------------------------------------------------------------------------------------------------------------------------------------------------------------------------------------------------------------------------------------------------------------------------------------------------------------------------------------------------------------------------------------------------------------------------------------------------------------------------------------------------------------------------------------------------------------------------------------------------------------------------------------------------------------------------------------------------------------------------------------------------------------------------------------------------------------------------------------------------------------------------------------------------------------------------------------------------------------------------------------------------------------------------------------------------------------------------------------------------------------------------------------------------------------------------------------------------------------------------------------------------------------------------------------------------------------------------------------------------------------------------------------------------------------------------------------------------------------------------------------------------------------------------------------------------------------------------------------------------------------------------------------------|
|                                                                                    | <p>C,5.4191665606,-3.1595360824,1.2796718089<br/> C,5.0435045567,-1.9595741879,0.6997569791<br/> H,5.7775532511,-1.1651375133,0.5993179969<br/> C,-4.756978893,-0.7929857412,2.8468956938<br/> H,-5.5091446265,-0.3652267719,3.5020277334<br/> C,-0.2296189815,5.0347198619,1.2354587753<br/> H,-1.2850300489,5.2730054302,1.3277581588<br/> H,3.5107071563,4.0830834012,1.1746764912<br/> H,2.7993582324,6.1835019618,2.2103589699<br/> O,-2.1252192441,0.1861648384,-2.3857746416<br/> C,-2.7613536968,-0.3856107271,-1.5087588268<br/> O,-3.5199909473,-1.3479491695,-1.5205933555<br/> H,-4.8858661797,4.9949583721,-0.9996060984<br/> H,0.3893657101,6.8187130809,2.2636053699<br/> H,6.765569177,1.9833981028,-2.2867409185<br/> H,6.4439350409,-3.3245654734,1.596297004<br/> H,-1.6453927524,-6.7838990395,-0.9213178676<br/> H,-4.8651931937,-2.7539152992,3.7216319678<br/> Na,-2.8538812971,-1.5079510492,-3.7142357382</p>                                                                                                                                                                                                                                                                                                                                                                                                                                                                                                                                                                                                                                                                                                                                                                                                                                                                                                                                                                                                                                                                                                                                                                                                                                   |
| 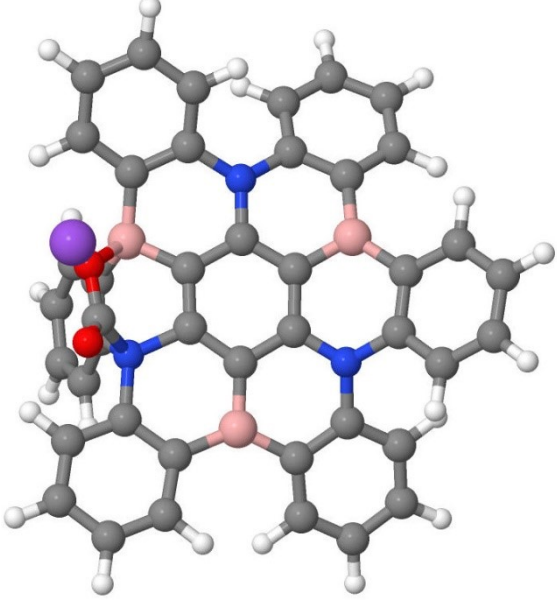 | <p><b>1CO<sub>2</sub>-B<sub>3</sub>N<sub>3</sub>-NG-Na</b><br/> <b>E=-2203.82816876H; FreqIm=0</b><br/> C,5.0742803591,3.1563148365,1.5049550061<br/> C,3.5392922472,1.091457106,0.369906266<br/> C,3.0406740731,2.4186896046,0.3612556717<br/> C,4.7712008909,0.8104918737,0.9868946124<br/> C,5.5266893339,1.8324432894,1.5376787137<br/> C,0.7532211937,1.3960647067,-0.1809928406<br/> C,0.804984625,3.9418669744,-0.4336566293<br/> C,-0.6618180279,1.4504857765,-0.178269753<br/> C,4.6616344326,-1.0808181439,-1.243775763<br/> H,5.1312791836,-0.1088627847,-1.3499558975<br/> C,3.3967193647,-1.1834205171,-0.6451460627<br/> C,1.3875616381,0.139909973,-0.2338400885<br/> C,1.4216083521,5.1226212975,-0.892878376<br/> H,2.5062438585,5.1834727199,-0.8726304658<br/> C,2.7471364677,-2.43886091,-0.5988927644<br/> C,-0.6046337814,3.8611078883,-0.511461991<br/> C,-1.3402447159,4.9094384979,-1.0857122152<br/> H,-2.413629895,4.8181258964,-1.211047014<br/> C,0.6930953934,6.1789183297,-1.4147616153<br/> B,1.5837862599,2.6589397611,-0.0754853553<br/> C,5.3214196654,-2.2113962024,-1.7098740619<br/> H,6.303372991,-2.103615143,-2.1606976954<br/> C,4.7277670367,-3.4698753681,-1.6045129128<br/> C,3.4463974988,-3.5606300852,-1.0709468136<br/> H,2.9577245769,-4.532888261,-1.0105054023<br/> C,-0.6955895278,6.0567522176,-1.522372663<br/> H,-1.2803836793,6.8534580061,-1.9723668967<br/> B,1.2051750457,-2.4934398791,-0.2692205321<br/> C,0.625979056,-1.035338354,-0.3315651831<br/> C,-5.6545110857,-2.3963307447,-0.9618051808<br/> C,-2.9260854827,-2.2397225809,-0.5500988517<br/> C,-3.6671860546,-1.0547040539,-0.4515404311<br/> C,-5.0497584229,-1.1761294914,-0.6909402888<br/> H,-5.6576738618,-0.2775191539,-0.6873701818<br/> C,-3.5109872932,-3.4776854341,-0.803530397<br/> H,-2.9030644653,-4.3774700973,-0.8469891967<br/> C,-4.8826668935,-3.557952318,-1.0003799513<br/> H,-5.3418372969,-4.5210514531,-1.1982026234<br/> C,-1.4551730666,0.2796305542,-0.248718607<br/> C,-3.5079692023,1.6473464762,0.3625480351<br/> C,-1.8559873416,-3.4967553451,1.7931446025<br/> H,-2.9218392756,-3.3167234486,1.7193245801</p> |



|                                                                                     |                                                                                                                                                                                                                                                                                                                                                                                                                                                                                                                                                                                                                                                                                                                                                                                                                                                                                                                                                                                                                                                                                                                                                                                                                                                                                                                                                                                                                                                                                                                                                                                                                                                                 |
|-------------------------------------------------------------------------------------|-----------------------------------------------------------------------------------------------------------------------------------------------------------------------------------------------------------------------------------------------------------------------------------------------------------------------------------------------------------------------------------------------------------------------------------------------------------------------------------------------------------------------------------------------------------------------------------------------------------------------------------------------------------------------------------------------------------------------------------------------------------------------------------------------------------------------------------------------------------------------------------------------------------------------------------------------------------------------------------------------------------------------------------------------------------------------------------------------------------------------------------------------------------------------------------------------------------------------------------------------------------------------------------------------------------------------------------------------------------------------------------------------------------------------------------------------------------------------------------------------------------------------------------------------------------------------------------------------------------------------------------------------------------------|
|                                                                                     | <p>C,-0.9596008546,-3.0634527938,0.8301672788<br/> C,-0.7311021529,-0.9030020562,-0.343171654<br/> C,-4.7849020672,1.7968800806,0.9503047672<br/> H,-5.4574425756,0.9451282785,0.9603241586<br/> C,0.425536147,-3.2342351134,0.9157093394<br/> C,-2.6208515927,2.7560396412,0.4233109687<br/> C,-3.0176656691,3.930714885,1.0893542528<br/> H,-2.3193309846,4.7511597719,1.2052630744<br/> C,-5.1857083563,2.9667845181,1.5656917531<br/> B,-2.9570829634,0.3084234343,-0.1446360588<br/> C,-1.3307118458,-4.1738758484,2.8982475283<br/> H,-2.0065302799,-4.5211330437,3.6728940081<br/> C,0.0389719076,-4.3925326307,3.0107379503<br/> C,0.9108533066,-3.9194464077,2.0265421668<br/> H,1.9827182032,-4.0686588593,2.1290158798<br/> C,-4.2817699829,4.0334340913,1.6417677853<br/> H,-4.5560633724,4.9440888273,2.1658652809<br/> C,3.8417028211,3.4266357384,0.937713887<br/> H,3.4520170868,4.4403414238,0.9710382011<br/> H,5.123979987,-0.2116620427,1.063789602<br/> H,6.4684179231,1.5904485636,2.0214163638<br/> H,-6.7235367355,-2.446174898,-1.1430839095<br/> H,0.4312058829,-4.9201605043,3.8747167641<br/> H,-6.16967555,3.0466491366,2.0161204719<br/> H,5.6665332819,3.950239559,1.9482354184<br/> H,1.1937908346,7.0753127735,-1.7663987023<br/> H,5.2525564235,-4.3575632879,-1.9445582683<br/> O,-1.452121811,-2.9587713918,-2.6892975356<br/> C,-0.8085981205,-2.867897675,-1.666959168<br/> O,0.4309203343,-3.175018024,-1.5522863415<br/> N,-1.2976140046,2.6802233613,-0.0918736999<br/> N,2.7677509359,0.0223390572,-0.1655416786<br/> N,-1.436043482,-2.2610958585,-0.3955579574<br/> Na,0.6357759518,-3.3155452722,-3.7890248026</p> |
| 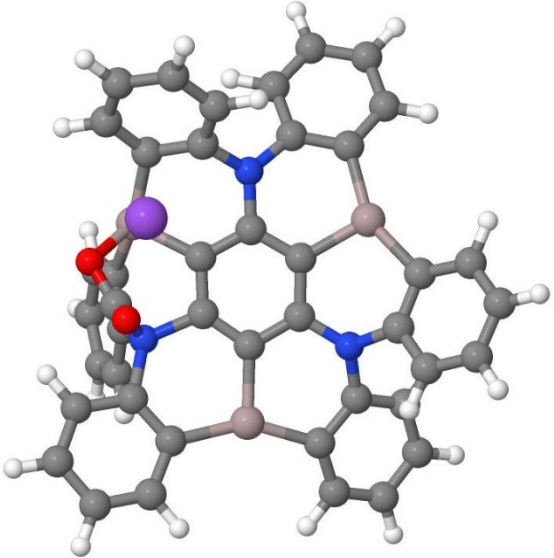 | <p><b>1CO<sub>2</sub>-Al<sub>3</sub>N<sub>3</sub>-NG-Na</b><br/> <b>E=-2856.40356763H; FreqIm=0</b><br/> C,5.2265060666,3.6631103861,1.6070807892<br/> C,3.5607275232,1.6455716888,0.5487860451<br/> C,3.1072007734,2.989778674,0.5690460573<br/> C,4.8229744358,1.3380436151,1.0915769127<br/> C,5.6429124787,2.3306744441,1.6064180962<br/> C,0.5545714254,1.4962133604,0.0101318639<br/> C,-0.1992331937,4.3569670389,-0.4494978017<br/> C,-0.8382620122,1.2750568408,-0.0179256964<br/> C,4.5006138901,0.0931226312,-1.6975616381<br/> H,4.5022075615,1.1663014677,-1.8695520009<br/> C,3.6545479492,-0.4340862227,-0.7048262035<br/> C,1.4205352704,0.3870133158,-0.0374990879<br/> C,-0.096536183,5.6381897436,-1.0265424053<br/> H,0.8400732908,6.1840514546,-0.9332312835<br/> C,3.6358879278,-1.8352926911,-0.4598625641<br/> C,-1.4276995592,3.6639197949,-0.5839664881<br/> C,-2.4735096208,4.2532150365,-1.3166661577<br/> H,-3.4076098333,3.7136232465,-1.4413076715<br/> C,-1.1460157655,6.2315622386,-1.7136461802<br/> C,5.3408239856,-0.7312336851,-2.4403861639<br/> H,5.9840173473,-0.2970230347,-3.2000838029<br/> C,5.3541326531,-2.1073264792,-2.2039517767<br/> C,4.5028043008,-2.6353076174,-1.2332313626<br/> H,4.5062147053,-3.7122082623,-1.0747959654<br/> C,-2.335635494,5.5175506914,-1.8700897404<br/> H,-3.160781362,5.9445281199,-2.4324513901<br/> C,0.9240531968,-0.9245788636,-0.1159236801</p>                                                                                                                                                                                                                             |

|  |                                                                                                                                                                                                                                                                                                                                                                                                                                                                                                                                                                                                                                                                                                                                                                                                                                                                                                                                                                                                                                                                                                                                                                                                                                                                                                                                                                                                                                                                                                                                                                                                                                                                                                                                                                                                                                                                                                                                                                                                                                                                                                                                                                                                                                                                                                                                                                                                                               |
|--|-------------------------------------------------------------------------------------------------------------------------------------------------------------------------------------------------------------------------------------------------------------------------------------------------------------------------------------------------------------------------------------------------------------------------------------------------------------------------------------------------------------------------------------------------------------------------------------------------------------------------------------------------------------------------------------------------------------------------------------------------------------------------------------------------------------------------------------------------------------------------------------------------------------------------------------------------------------------------------------------------------------------------------------------------------------------------------------------------------------------------------------------------------------------------------------------------------------------------------------------------------------------------------------------------------------------------------------------------------------------------------------------------------------------------------------------------------------------------------------------------------------------------------------------------------------------------------------------------------------------------------------------------------------------------------------------------------------------------------------------------------------------------------------------------------------------------------------------------------------------------------------------------------------------------------------------------------------------------------------------------------------------------------------------------------------------------------------------------------------------------------------------------------------------------------------------------------------------------------------------------------------------------------------------------------------------------------------------------------------------------------------------------------------------------------|
|  | <p> C,-4.6639738587,-4.1701247429,-1.4485514094<br/> C,-2.2563783294,-2.9984529847,-0.6967775726<br/> C,-3.4097099176,-2.2033957352,-0.6813141449<br/> C,-4.6083007535,-2.8341933611,-1.0718672735<br/> H,-5.528995192,-2.2552904822,-1.0778460606<br/> C,-2.2952193948,-4.3460557146,-1.058742901<br/> H,-1.3928343984,-4.9540278644,-1.0217102831<br/> C,-3.4948555421,-4.9301483469,-1.4406430683<br/> H,-3.5140904241,-5.9775425796,-1.7241141938<br/> C,-1.3782185662,-0.0372331285,-0.1046431437<br/> C,-3.9960652544,1.2925149102,0.4403972202<br/> C,-1.6687137616,-3.6083106411,1.9094620795<br/> H,-2.6877074477,-3.5159530828,1.5552218866<br/> C,-0.577275315,-3.2149280774,1.1378365814<br/> C,-0.4503852772,-1.0531928814,-0.1498346142<br/> C,-5.2620090921,1.4432784376,1.0406696916<br/> H,-6.005893269,0.6603717576,0.9083931125<br/> C,0.7463645688,-3.3187394759,1.6091690535<br/> C,-3.0395628297,2.3239493301,0.6264225095<br/> C,-3.3719619704,3.4270056015,1.4317991486<br/> H,-2.6335949009,4.2069016469,1.5923547609<br/> C,-5.5946164959,2.5548723603,1.8009470989<br/> C,-1.4466079647,-4.1444497755,3.1780408012<br/> H,-2.2987866628,-4.4487313625,3.7772488318<br/> C,-0.1533342472,-4.2897321393,3.6634616452<br/> C,0.9224958876,-3.8752141582,2.8794898155<br/> H,1.928959638,-3.9804244165,3.2759305746<br/> C,-4.6282937818,3.5416887054,2.0078834019<br/> H,-4.8519806123,4.4046876835,2.6279582604<br/> C,3.9686874329,3.9666862584,1.1070539142<br/> H,3.6359628403,5.0023976356,1.1327128294<br/> H,5.1609905326,0.3064382719,1.114715251<br/> H,6.6088473496,2.058344178,2.0215393436<br/> H,-5.6076860001,-4.6190356823,-1.741770571<br/> H,0.0179823661,-4.7139033428,4.6479939304<br/> H,-6.5811586648,2.6468765766,2.2439985136<br/> H,5.8672375518,4.4424651761,2.0069417047<br/> H,-1.0384438101,7.224911669,-2.1377754052<br/> H,6.0144389321,-2.757858287,-2.7695487688<br/> O,-0.3000012877,-2.6619237671,-2.5323797067<br/> C,0.0721986921,-2.9928353892,-1.4328906733<br/> O,1.1878280965,-3.5156677318,-1.1112395834<br/> N,-1.730666908,2.3781045761,0.0103511441<br/> N,2.8364797937,0.5330750402,-0.007233908<br/> N,-0.8735680196,-2.5668195176,-0.2378917564<br/> Al,-3.2319638469,-0.3348104325,-0.2038002243<br/> Al,1.9667498582,-2.5052255997,0.3245250266<br/> Al,1.2603088017,3.2478751113,0.1118813453<br/> Na,2.0456465167,-1.8265310775,-2.7068602579 </p> |
|--|-------------------------------------------------------------------------------------------------------------------------------------------------------------------------------------------------------------------------------------------------------------------------------------------------------------------------------------------------------------------------------------------------------------------------------------------------------------------------------------------------------------------------------------------------------------------------------------------------------------------------------------------------------------------------------------------------------------------------------------------------------------------------------------------------------------------------------------------------------------------------------------------------------------------------------------------------------------------------------------------------------------------------------------------------------------------------------------------------------------------------------------------------------------------------------------------------------------------------------------------------------------------------------------------------------------------------------------------------------------------------------------------------------------------------------------------------------------------------------------------------------------------------------------------------------------------------------------------------------------------------------------------------------------------------------------------------------------------------------------------------------------------------------------------------------------------------------------------------------------------------------------------------------------------------------------------------------------------------------------------------------------------------------------------------------------------------------------------------------------------------------------------------------------------------------------------------------------------------------------------------------------------------------------------------------------------------------------------------------------------------------------------------------------------------------|

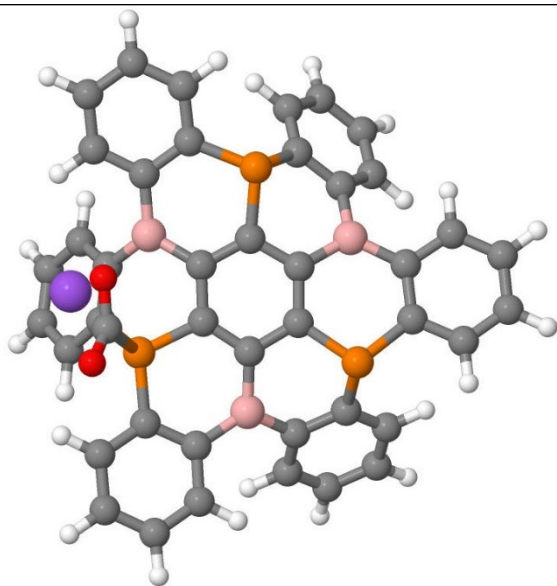

**B<sub>3</sub>P<sub>3</sub>-NG-Na inter**

**E=-3063.54080658H; FreqIm=0**

C,-2.2553856997,-5.011392532,2.3591760817  
 C,-2.6624043724,-3.0367315673,0.4161895587  
 C,-1.355119091,-3.5553851018,0.6113035957  
 C,-3.7377330877,-3.5271678536,1.1548489131  
 C,-3.5324205112,-4.5059762331,2.1276222989  
 P,2.5640158654,-1.330362323,-0.4330163639  
 P,-2.8830074321,-1.819551218,-0.943640132  
 C,-0.2089488429,-1.4265254299,-0.5054824206  
 C,1.2257065592,-3.7399633079,-0.2971302036  
 C,0.9207196803,-0.6156368892,-0.4392268504  
 C,-5.5932145763,-1.4070460765,-0.8360162739  
 H,-5.6442786036,-2.4637228599,-1.0914411137  
 C,-4.3500829523,-0.7988693961,-0.6133833166  
 C,-1.4631543414,-0.7522849137,-0.5899057133  
 C,1.2128902211,-5.1386188254,-0.423530489  
 H,0.2624398444,-5.662479922,-0.3777642182  
 C,-4.2673110988,0.5913951804,-0.351122894  
 C,2.4883522568,-3.1134951762,-0.4155362495  
 C,3.667273615,-3.8341416239,-0.6227682103  
 H,4.6175881757,-3.3189350197,-0.7389815737  
 C,2.3818466249,-5.8697143436,-0.6299538764  
 B,-0.1214101322,-2.9418800112,-0.1169405494  
 C,-6.7682279154,-0.6656644088,-0.7721889378  
 H,-7.7248409676,-1.1533464347,-0.9348435849  
 C,-6.7080141725,0.70885644,-0.5430668388  
 C,-5.4754991225,1.3187944077,-0.3443104596  
 H,-5.4392900039,2.3951288232,-0.2011123228  
 C,3.6125101026,-5.222261363,-0.7156896965  
 H,4.5229831282,-5.790807451,-0.876160217  
 B,-2.9097788212,1.3259843073,-0.1415030783  
 C,-1.5544374971,0.6448410333,-0.5493087421  
 C,3.5623930853,5.2050470387,-0.3895300986  
 C,1.0731137939,3.9195213984,-0.5317945861  
 C,2.2289278083,3.157193988,-0.2346546729  
 C,3.4642581932,3.8340800438,-0.187866896  
 H,4.3699422594,3.2605991017,-0.0049205066  
 C,1.1803099951,5.301068205,-0.7496869877  
 H,0.2979840619,5.8768424474,-1.0224553885  
 C,2.4089623315,5.9452150845,-0.6537188205  
 H,2.4706744102,7.0178904071,-0.811941608  
 P,-0.5503080566,3.1743708194,-0.8984725338  
 C,0.9081165592,0.7979662126,-0.4352233014  
 C,3.1977491035,0.8909551212,0.969241406  
 C,-1.5840355545,4.7157604404,1.2501839485  
 H,-0.7479032573,5.3935177638,1.102809933  
 C,-1.7091213734,3.5645772156,0.4746936698  
 C,-0.3482204957,1.4043521437,-0.5582004886  
 C,3.8184298783,1.5654384331,2.0297887875  
 H,3.6396247337,2.6287825423,2.1606055993  
 C,-2.7963756562,2.6737252996,0.657369008  
 C,3.4316357693,-0.5019239529,0.9027581373  
 C,4.2556389511,-1.1827718103,1.7945088642  
 H,4.4018568684,-2.2566607964,1.7092460722  
 C,4.6396552575,0.8997513902,2.9429855312  
 B,2.1652600703,1.623108399,0.0045870625  
 C,-2.511220572,4.9829623142,2.2578642715  
 H,-2.3940973559,5.8703473888,2.8732348971  
 C,-3.5655089454,4.1038273135,2.4887563975  
 C,-3.7007581163,2.9684864507,1.6937142139  
 H,-4.5140227238,2.2780048167,1.8996131147  
 C,4.8675254629,-0.4682391847,2.8247198578

|                                                                                    |                                                                                                                                                                                                                                                                                                                                                                                                                                                                                                                                                                                                                                                                                                                                                                                                                                                                                                                                                                                                                                                                                                                                                                                                                                                                                                                                                                                                                                                                                                                                                                                                                                                                                                                                                                                                                                                                                                                                                                                                                                                                                                                                                                                                                                                                                                                                                                                         |
|------------------------------------------------------------------------------------|-----------------------------------------------------------------------------------------------------------------------------------------------------------------------------------------------------------------------------------------------------------------------------------------------------------------------------------------------------------------------------------------------------------------------------------------------------------------------------------------------------------------------------------------------------------------------------------------------------------------------------------------------------------------------------------------------------------------------------------------------------------------------------------------------------------------------------------------------------------------------------------------------------------------------------------------------------------------------------------------------------------------------------------------------------------------------------------------------------------------------------------------------------------------------------------------------------------------------------------------------------------------------------------------------------------------------------------------------------------------------------------------------------------------------------------------------------------------------------------------------------------------------------------------------------------------------------------------------------------------------------------------------------------------------------------------------------------------------------------------------------------------------------------------------------------------------------------------------------------------------------------------------------------------------------------------------------------------------------------------------------------------------------------------------------------------------------------------------------------------------------------------------------------------------------------------------------------------------------------------------------------------------------------------------------------------------------------------------------------------------------------------|
|                                                                                    | <p>H,5.5024494712,-0.9837133944,3.5383253353<br/> C,-1.1861882447,-4.5395187093,1.604049373<br/> H,-0.1898845922,-4.9219606666,1.8103237827<br/> H,-4.7361667538,-3.1262410143,1.006606038<br/> H,-4.373912264,-4.8605336468,2.7158353483<br/> O,3.4420673745,0.5535976388,-2.090785975<br/> C,3.4068635638,-0.6936432102,-2.0147788411<br/> O,3.8411198436,-1.5298150483,-2.8233631441<br/> H,2.3308195123,-6.9497754178,-0.7291709643<br/> H,-2.0939353283,-5.7627817825,3.125710135<br/> H,-7.6174297336,1.301832854,-0.5345615729<br/> H,-4.276777575,4.2989834442,3.2853385719<br/> H,4.5296700808,5.6967523023,-0.3481786706<br/> H,5.098146433,1.4547910271,3.7558681441<br/> Na,4.3418850772,0.2400966783,-4.1429045656</p>                                                                                                                                                                                                                                                                                                                                                                                                                                                                                                                                                                                                                                                                                                                                                                                                                                                                                                                                                                                                                                                                                                                                                                                                                                                                                                                                                                                                                                                                                                                                                                                                                                                     |
| 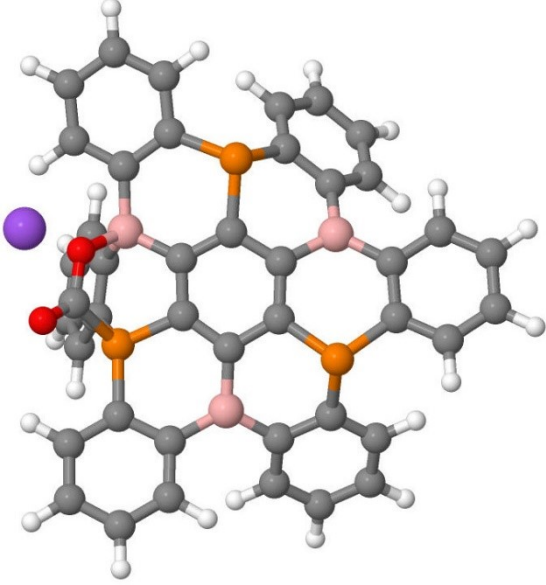 | <p><b>1CO<sub>2</sub>-B<sub>3</sub>P<sub>3</sub>-NG-Na</b><br/> <b>E=-3063.54635060H; FreqIm=0</b><br/> C,-0.6387737358,-5.2986718647,2.1370873103<br/> C,-1.4567236118,-3.5313505089,0.1317746467<br/> C,-0.0674980187,-3.7368741768,0.3390921582<br/> C,-2.402633104,-4.2290343159,0.8815129415<br/> C,-1.9941863111,-5.1088269831,1.8839965323<br/> P,3.3379341888,-0.7216625463,-1.1255631133<br/> P,-1.9310159254,-2.3918862326,-1.2345900302<br/> C,0.6199510988,-1.4292543199,-0.7967352893<br/> C,2.4978962571,-3.3837542185,-0.5856713988<br/> C,1.5909989025,-0.4118226615,-0.7812618892<br/> C,-4.6703680367,-2.5551213221,-1.0803133304<br/> H,-4.4844234556,-3.5930442681,-1.3510587015<br/> C,-3.5867665706,-1.6839852174,-0.8729081106<br/> C,-0.7544292876,-1.0654274445,-0.8343327852<br/> C,2.7854428857,-4.7642666862,-0.5958424233<br/> H,1.9673863189,-5.4705864424,-0.4854133465<br/> C,-3.824613188,-0.318735035,-0.6051018251<br/> C,3.5820779179,-2.4956642357,-0.8056999181<br/> C,4.8765290177,-2.9934548803,-1.009370699<br/> H,5.6921210885,-2.3112028984,-1.2403578044<br/> C,4.0744985278,-5.2526430575,-0.7712228975<br/> B,1.0270534044,-2.8945445118,-0.4118276199<br/> C,-5.9836234782,-2.1109793609,-0.9743475051<br/> H,-6.805000213,-2.8055404065,-1.1230768354<br/> C,-6.2353695157,-0.7673906022,-0.6959248827<br/> C,-5.1637845497,0.1039902827,-0.5233900484<br/> H,-5.3664149477,1.1498992878,-0.2881119175<br/> C,5.1290480426,-4.3604370319,-0.9621976798<br/> H,6.1399941545,-4.728882099,-1.1093201752<br/> B,-2.6710675098,0.756284809,-0.3934080282<br/> C,-1.1635684132,0.2580215575,-0.6708334258<br/> C,2.5293590647,5.9166394052,-0.7123747614<br/> C,0.5155010666,4.0620388589,-0.3751739118<br/> C,1.8532738655,3.5896847905,-0.3666351184<br/> C,2.8437089847,4.5669498683,-0.5505845307<br/> H,3.8849987388,4.2592135297,-0.5844975172<br/> C,0.1846090333,5.4119500145,-0.5173027491<br/> H,-0.855054761,5.7302897667,-0.5188656625<br/> C,1.2039995268,6.3457771528,-0.6820241055<br/> H,0.9629340318,7.397216532,-0.7999958114<br/> P,-0.773866639,2.8427151512,-0.2619296909<br/> C,1.2326580426,0.9536958798,-0.6339504745<br/> C,3.5834665459,1.5943238885,0.4264586378<br/> C,-1.7557404765,3.4748440348,2.3208905532<br/> H,-1.0510077259,4.2999990411,2.3900277491<br/> C,-1.8313048194,2.6839558058,1.1767161685</p> |

|                                                                                     |                                                                                                                                                                                                                                                                                                                                                                                                                                                                                                                                                                                                                                                                                                                                                                                                                                                                                                                                                                                                                                                                                                                                                                                                                                                                                                                                                                                                                                                                                                                                                                                                                                                             |
|-------------------------------------------------------------------------------------|-------------------------------------------------------------------------------------------------------------------------------------------------------------------------------------------------------------------------------------------------------------------------------------------------------------------------------------------------------------------------------------------------------------------------------------------------------------------------------------------------------------------------------------------------------------------------------------------------------------------------------------------------------------------------------------------------------------------------------------------------------------------------------------------------------------------------------------------------------------------------------------------------------------------------------------------------------------------------------------------------------------------------------------------------------------------------------------------------------------------------------------------------------------------------------------------------------------------------------------------------------------------------------------------------------------------------------------------------------------------------------------------------------------------------------------------------------------------------------------------------------------------------------------------------------------------------------------------------------------------------------------------------------------|
|                                                                                     | <p>C,-0.1372630254,1.2047585489,-0.5704651152<br/> C,4.2268481929,2.3992646494,1.3872669172<br/> H,3.8334100302,3.3899628986,1.6004135044<br/> C,-2.7120829751,1.5937786651,1.0152537132<br/> C,4.0924282616,0.2821359926,0.2178824457<br/> C,5.2129529073,-0.1582130744,0.922061503<br/> H,5.5983549837,-1.1619408154,0.7695940207<br/> C,5.3300703868,1.949261839,2.1041796666<br/> B,2.2554872986,2.0596791688,-0.2357882927<br/> C,-2.602257841,3.1633528026,3.38320763<br/> H,-2.5700838713,3.7532941353,4.2935124097<br/> C,-3.4784957454,2.0833399002,3.2738899558<br/> C,-3.533014153,1.3108475926,2.1098078955<br/> H,-4.2226202171,0.4721526209,2.0550817677<br/> C,5.8218990013,0.6675621513,1.8665662696<br/> H,6.6755894248,0.2988624337,2.4279629587<br/> C,0.304271954,-4.620067694,1.3694510556<br/> H,1.3583560848,-4.7573585494,1.594313975<br/> H,-3.464312045,-4.0666846223,0.7192290203<br/> H,-2.7400001921,-5.629468093,2.4778923742<br/> H,3.3265532081,6.6386419839,-0.861598419<br/> H,-4.1281663934,1.8376335539,4.1089567926<br/> H,5.7983350964,2.5876083791,2.8467355769<br/> H,-0.3173043351,-5.9674599585,2.9295378191<br/> H,4.2560890379,-6.323030476,-0.7760019325<br/> H,-7.2569342641,-0.4071729245,-0.612681319<br/> O,-2.1961429612,3.8134868101,-2.4425580362<br/> C,-2.090549252,2.9373510624,-1.5958564126<br/> O,-2.9103428001,1.931012082,-1.5161271712<br/> Na,-3.9890436102,2.6029883686,-3.3626965266</p>                                                                                                                                                                                                    |
| 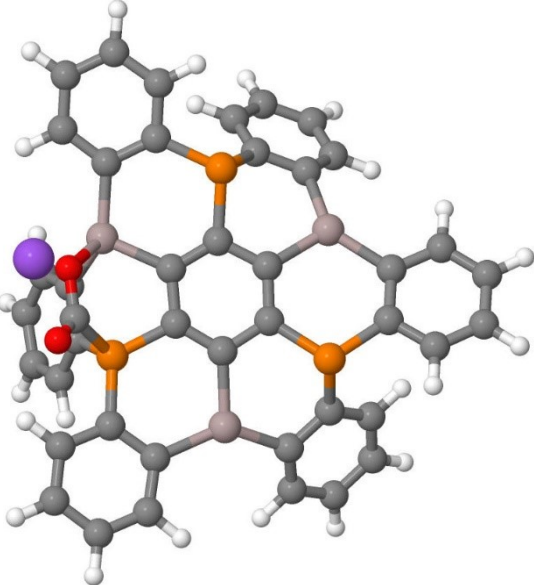 | <p><b>1CO<sub>2</sub>-Al<sub>3</sub>P<sub>3</sub>-NG-Na</b><br/> <b>E=-3716.18482695H; FreqIm=0</b><br/> C,-0.187457654,-5.6923425958,2.460452723<br/> C,-1.0122301222,-3.8811898535,0.4785916567<br/> C,0.3672288093,-4.1920292398,0.6116354469<br/> C,-1.9454151199,-4.4672422648,1.336301498<br/> C,-1.5322506757,-5.3683189049,2.3209703957<br/> P,3.4047368308,-0.1399322431,-1.1415926253<br/> P,-1.5212543546,-2.8198302503,-0.9693458774<br/> C,0.8097140295,-1.3484657746,-0.7278686912<br/> C,3.5542386248,-3.0280511119,-0.5891476557<br/> C,1.5897019099,-0.1834576676,-0.7302405077<br/> C,-4.0376269124,-3.7981682672,-1.0718846774<br/> H,-3.4734799948,-4.6837465827,-1.3611584142<br/> C,-3.3544228907,-2.6066198845,-0.7660403034<br/> C,-0.6069528136,-1.2356979557,-0.6432979145<br/> C,4.3477980258,-4.1903999233,-0.5596787497<br/> H,3.8990159354,-5.1368874475,-0.2622165141<br/> C,-4.0970117156,-1.4443018932,-0.4396218094<br/> C,4.1663700926,-1.8172180743,-0.9935538839<br/> C,5.515035116,-1.8191450376,-1.3871930857<br/> H,5.9789409241,-0.8971547314,-1.7342983625<br/> C,5.6946103488,-4.1759666909,-0.9089059826<br/> Al,1.6429299014,-3.0537673529,-0.3116216729<br/> C,-5.4244360563,-3.8763980513,-1.0040911855<br/> H,-5.9233950952,-4.8145895495,-1.22885396<br/> C,-6.1662419278,-2.7478428884,-0.6575690559<br/> C,-5.5002880421,-1.5546685041,-0.3931986013<br/> H,-6.0954820393,-0.6794542137,-0.1314196619<br/> C,6.2772036987,-2.9815802528,-1.3308728736<br/> H,7.3216221632,-2.9557629671,-1.6277090916<br/> Al,-3.1586594837,0.2298144341,-0.1565737833<br/> C,-1.24078116,0.0001824768,-0.4948619557</p> |

|  |                                                                                                                                                                                                                                                                                                                                                                                                                                                                                                                                                                                                                                                                                                                                                                                                                                                                                                                                                                                                                                                                                                                                                                                                                                                                                                                                                                                                                                                                                                                                                                                                                                                                                                                                                                                                                                                                                                                                                                                                                                                                                                    |
|--|----------------------------------------------------------------------------------------------------------------------------------------------------------------------------------------------------------------------------------------------------------------------------------------------------------------------------------------------------------------------------------------------------------------------------------------------------------------------------------------------------------------------------------------------------------------------------------------------------------------------------------------------------------------------------------------------------------------------------------------------------------------------------------------------------------------------------------------------------------------------------------------------------------------------------------------------------------------------------------------------------------------------------------------------------------------------------------------------------------------------------------------------------------------------------------------------------------------------------------------------------------------------------------------------------------------------------------------------------------------------------------------------------------------------------------------------------------------------------------------------------------------------------------------------------------------------------------------------------------------------------------------------------------------------------------------------------------------------------------------------------------------------------------------------------------------------------------------------------------------------------------------------------------------------------------------------------------------------------------------------------------------------------------------------------------------------------------------------------|
|  | C,0.7881632728,6.7354627945,-0.6054471729<br>C,-0.4166214523,4.2370874877,-0.488896078<br>C,0.9942512961,4.3041802187,-0.3871537351<br>C,1.5632061683,5.5868049021,-0.4481171176<br>H,2.6434334269,5.6968573543,-0.3765510991<br>C,-1.2058799422,5.3845772943,-0.6426057866<br>H,-2.288363307,5.3093109928,-0.7128963072<br>C,-0.5980886072,6.6346884346,-0.7055549921<br>H,-1.2063462062,7.5249311549,-0.8304026041<br>P,-1.3201740656,2.6850919302,-0.3087411504<br>C,0.994379343,1.1052595463,-0.6371789238<br>C,3.7788296347,2.1700521691,0.4638495075<br>C,-2.1984971592,3.6528973131,2.1591777758<br>H,-1.4920482503,4.468721037,2.0276905207<br>C,-2.3416297822,2.6532516924,1.1918746633<br>C,-0.3921374182,1.1261617233,-0.4913364033<br>C,4.4507809492,2.9335744732,1.4297950138<br>H,4.1687973524,3.9730672636,1.5912703918<br>C,-3.2391916383,1.5677322447,1.3192369805<br>C,4.1534607033,0.80971361,0.2865802213<br>C,5.1722843663,0.2710099482,1.0759945088<br>H,5.4631411855,-0.7692920246,0.9672764492<br>C,5.4835759854,2.3949065947,2.1971955518<br>Al,2.0779916574,2.6711084553,-0.2922661347<br>C,-2.9798123332,3.5830810254,3.3106668052<br>H,-2.8827387325,4.3467822251,4.0758725895<br>C,-3.8783760575,2.5305004661,3.4747976617<br>C,-3.9991674503,1.5414368614,2.4952488055<br>H,-4.7025361841,0.7277558896,2.6593502834<br>C,5.8305535239,1.0596537838,2.0230221391<br>H,6.6175721206,0.6184545334,2.6280635835<br>C,0.7489529661,-5.0921595102,1.6173391843<br>H,1.8016568344,-5.3368638426,1.751735084<br>H,-3.0011133612,-4.22595292,1.254600926<br>H,-2.2716045322,-5.8121597885,2.9818089676<br>H,1.2652634789,7.7099172696,-0.6512695745<br>H,-4.4858595765,2.4778391307,4.3738302033<br>H,6.0035844578,3.00793792,2.9270399901<br>H,0.1316813751,-6.3984464686,3.2212069795<br>H,6.2816008614,-5.0887645937,-0.8705651445<br>H,-7.2498398801,-2.7988981949,-0.6012613533<br>O,-2.6601475712,3.3393545123,-2.6118869873<br>C,-2.6142996362,2.5422534675,-1.6810618219<br>O,-3.4229550742,1.5330538533,-1.5769048595<br>Na,-4.2377829141,2.0450958232,-3.6362707456 |
|--|----------------------------------------------------------------------------------------------------------------------------------------------------------------------------------------------------------------------------------------------------------------------------------------------------------------------------------------------------------------------------------------------------------------------------------------------------------------------------------------------------------------------------------------------------------------------------------------------------------------------------------------------------------------------------------------------------------------------------------------------------------------------------------------------------------------------------------------------------------------------------------------------------------------------------------------------------------------------------------------------------------------------------------------------------------------------------------------------------------------------------------------------------------------------------------------------------------------------------------------------------------------------------------------------------------------------------------------------------------------------------------------------------------------------------------------------------------------------------------------------------------------------------------------------------------------------------------------------------------------------------------------------------------------------------------------------------------------------------------------------------------------------------------------------------------------------------------------------------------------------------------------------------------------------------------------------------------------------------------------------------------------------------------------------------------------------------------------------------|

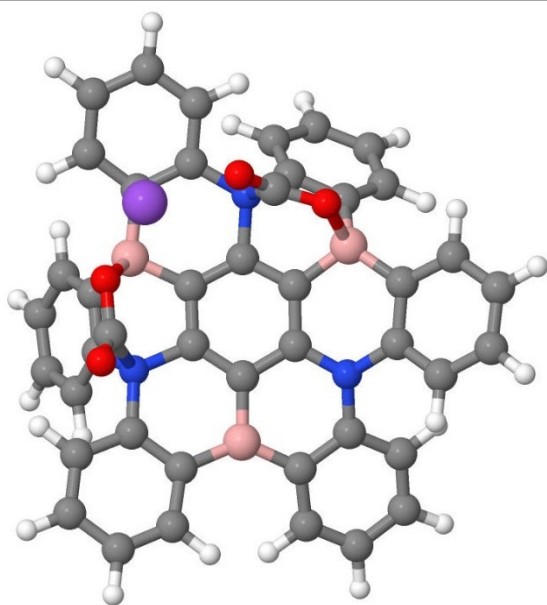

**2CO<sub>2</sub>-B<sub>3</sub>N<sub>3</sub>-NG-Na**

**E=-2392.31984191H; FreqIm=0**

C,-0.4439607036,5.7531659903,2.2802989151  
 C,0.7910649354,3.5499889641,1.0260758126  
 C,-0.6269627779,3.6965435751,0.9589638245  
 C,1.5510823743,4.485231176,1.7539262541  
 C,0.9425335144,5.5681002397,2.3617428442  
 N,-2.7701242528,-0.1165346283,-0.1563311624  
 N,1.4478074185,2.434895979,0.4498023221  
 C,-0.6733997,1.2578743001,0.2560863969  
 C,-2.9711860972,2.4140542892,-0.009264512  
 C,-1.2950097933,0.0276093953,0.1089111176  
 C,3.3157119681,3.7314401512,-0.4486109996  
 H,2.6714684219,4.6032420332,-0.4627130588  
 C,2.8202308178,2.4948048754,-0.0119740455  
 C,0.743205254,1.2504082404,0.3143776662  
 C,-3.8072559778,3.5275614897,-0.2184912991  
 H,-3.3882043914,4.5206492109,-0.0949632645  
 C,3.6334678016,1.3398730096,-0.1205736995  
 C,-3.5475489866,1.1551471877,-0.2564813668  
 C,-4.8742370515,1.0079368428,-0.6535523842  
 H,-5.287193916,0.0208016449,-0.8395759653  
 C,-5.1320109108,3.4013893185,-0.61394525  
 C,4.6275377996,3.8546384605,-0.8890655987  
 H,4.9846487252,4.8253618222,-1.2194973673  
 C,5.4692557924,2.7440636057,-0.9240913564  
 C,4.9537924034,1.5060179673,-0.562801275  
 H,5.5792006684,0.6194961094,-0.650148534  
 C,-5.6713829371,2.1322349188,-0.821490189  
 H,-6.7041454248,2.0146346925,-1.1331259625  
 C,1.4454120818,0.0495134879,0.1862543606  
 C,-0.308122455,-6.0338970314,-1.1910427875  
 C,0.8260672774,-3.5939247373,-0.4635141653  
 C,-0.5779885296,-3.6986608965,-0.4831301807  
 C,-1.1112434762,-4.9497560366,-0.8536544386  
 H,-2.1943389516,-5.0577152639,-0.8718666293  
 C,1.6445823389,-4.6691092503,-0.823215909  
 H,2.7246034624,-4.5491141166,-0.8353997735  
 C,1.0809980199,-5.8868178704,-1.1785724681  
 H,1.7258272248,-6.7153383228,-1.4533282314  
 N,1.5565711658,-2.3239288218,-0.1862892391  
 C,-0.648439476,-1.1865476498,0.0695375731  
 C,-2.7443342306,-2.3841453927,0.8157666734  
 C,2.7272468533,-3.5206213247,1.7257825583  
 H,2.0535395494,-4.3664371734,1.6560311333  
 C,2.6318822166,-2.4221428035,0.8823018642  
 C,0.7211661556,-1.1143185661,0.0907843146  
 C,-3.2011211863,-3.327476693,1.7332620724  
 H,-2.7518339764,-4.3176378093,1.7485770246  
 C,3.4446505472,-1.2887431065,1.0013727589  
 C,-3.3419054037,-1.1186269063,0.8436046625  
 C,-4.32221544,-0.7565545463,1.7545542221  
 H,-4.740974436,0.2421620033,1.7850900057  
 C,-4.2085711187,-3.0074614485,2.645817225  
 C,3.7225711131,-3.5041585437,2.7055822263  
 H,3.8151710063,-4.3512776955,3.3775430944  
 C,4.5785524569,-2.4128354721,2.8282809304  
 C,4.4299597295,-1.3091874912,1.9871033324  
 H,5.0729903056,-0.4407341877,2.1060082074  
 C,-4.7552697925,-1.7277859758,2.6612727056  
 H,-5.5207454364,-1.4685351148,3.3853601873  
 C,-1.200717888,4.8181252455,1.6030744662  
 H,-2.2814621772,4.9197424298,1.6050299508

|                                                                                    |                                                                                                                                                                                                                                                                                                                                                                                                                                                                                                                                                                                                                                                                                                                                                                                                                                                                                                                                                                                                                                                                                                                                                                                                                                                                                                                                                                                                                                                                                                                                                                                                                                                                                                                                                                                                                                                                                                                                                                                                                                                                                                                                                                                                                               |
|------------------------------------------------------------------------------------|-------------------------------------------------------------------------------------------------------------------------------------------------------------------------------------------------------------------------------------------------------------------------------------------------------------------------------------------------------------------------------------------------------------------------------------------------------------------------------------------------------------------------------------------------------------------------------------------------------------------------------------------------------------------------------------------------------------------------------------------------------------------------------------------------------------------------------------------------------------------------------------------------------------------------------------------------------------------------------------------------------------------------------------------------------------------------------------------------------------------------------------------------------------------------------------------------------------------------------------------------------------------------------------------------------------------------------------------------------------------------------------------------------------------------------------------------------------------------------------------------------------------------------------------------------------------------------------------------------------------------------------------------------------------------------------------------------------------------------------------------------------------------------------------------------------------------------------------------------------------------------------------------------------------------------------------------------------------------------------------------------------------------------------------------------------------------------------------------------------------------------------------------------------------------------------------------------------------------------|
|                                                                                    | <p>H,2.6183899348,4.3380458667,1.8706516298<br/> H,1.5512946106,6.2628312636,2.9328428009<br/> O,-3.1856110434,-0.2050610185,-2.5416355045<br/> C,-2.7581540315,-0.8218648814,-1.6228034314<br/> O,-2.2144189508,-1.9952947761,-1.5997161345<br/> O,3.0670788498,-0.9141931116,-1.4425118617<br/> C,2.2153007841,-1.7991617289,-1.6156111185<br/> O,1.7008925465,-2.2911682856,-2.5959024151<br/> H,-0.7551987248,-6.9841297802,-1.4665424727<br/> H,-4.5551434394,-3.7516602226,3.3561158184<br/> H,-5.7414863259,4.2858403401,-0.7697977452<br/> H,-0.9160228492,6.5968667431,2.772816545<br/> H,6.4963136918,2.8400912274,-1.2615727874<br/> H,5.3489689257,-2.4143819531,3.593171041<br/> B,-1.4621557474,2.5474128656,0.3816042548<br/> B,-1.5276347593,-2.4454759724,-0.2119616388<br/> B,3.0030242681,-0.0917150459,0.0463954824<br/> Na,-0.4670692441,-2.7782483092,-3.009313052</p>                                                                                                                                                                                                                                                                                                                                                                                                                                                                                                                                                                                                                                                                                                                                                                                                                                                                                                                                                                                                                                                                                                                                                                                                                                                                                                                                  |
| 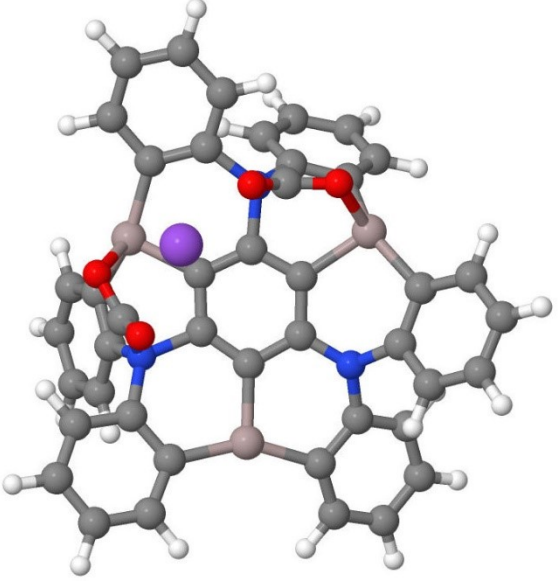 | <p><b>2CO<sub>2</sub>-Al<sub>3</sub>N<sub>3</sub>-NG-Na</b><br/> <b>E=-3044.93106964H; FreqIm=0</b><br/> C,4.0860353448,-4.1346257481,2.7534132393<br/> C,1.9203867827,-3.0990645779,1.2682193983<br/> C,3.1934330251,-2.4740415518,1.1893717513<br/> C,1.7548212979,-4.206007106,2.1194516514<br/> C,2.8184116918,-4.7157042693,2.8473515874<br/> N,1.7737304221,2.1666011366,-0.1697734941<br/> N,0.7563259027,-2.7201369867,0.5065656222<br/> C,1.319447864,-0.3365605144,0.2684939372<br/> C,4.0391887734,0.880385563,-0.2032424001<br/> C,0.8369278369,0.942533788,0.101553289<br/> C,0.8910050069,-4.8074297425,-0.6908719635<br/> H,1.9675308744,-4.6671651243,-0.6677049853<br/> C,0.0540263436,-3.8310409995,-0.1237376294<br/> C,0.3508981344,-1.3773436257,0.3424153675<br/> C,5.4139516955,0.9915150144,-0.497635753<br/> H,6.0636656478,0.1422302916,-0.2992348007<br/> C,-1.3537972608,-3.9932864965,-0.1924155426<br/> C,3.2530672254,2.0062176925,-0.4819387171<br/> C,3.7999219568,3.1727626378,-1.0192834477<br/> H,3.1725596542,4.044897412,-1.1961083233<br/> C,5.9752877727,2.1426490625,-1.0347031084<br/> Al,3.1612937168,-0.7401550462,0.3906775718<br/> C,0.3699235962,-5.9572613644,-1.2677297315<br/> H,1.0459916143,-6.6925307345,-1.6940258342<br/> C,-1.0087029382,-6.1577776355,-1.3058487943<br/> C,-1.8405133255,-5.1717934137,-0.7897404337<br/> H,-2.9165933618,-5.3196377676,-0.8567009338<br/> C,5.1568121671,3.2400676273,-1.3012621497<br/> H,5.5719235266,4.1507342625,-1.7208918038<br/> Al,-2.4346424346,-2.4158159413,0.1261616141<br/> C,-1.0112476709,-1.0898530791,0.1878089846<br/> C,-4.9026359759,4.0444990085,-1.4130146318<br/> C,-3.4378682532,1.7977544842,-0.6472024691<br/> C,-2.8213649241,3.0568381976,-0.5409261377<br/> C,-3.6035177163,4.1642065739,-0.9391140274<br/> H,-3.1706008791,5.1600345864,-0.8722829909<br/> C,-4.7447850713,1.6622148444,-1.1285910846<br/> H,-5.2059470703,0.6777145184,-1.1818693273<br/> C,-5.4746653699,2.7758809877,-1.5128258106<br/> H,-6.4874503927,2.6515217137,-1.8824515363<br/> N,-2.8696790045,0.4490729637,-0.2335633437<br/> C,-0.5027236045,1.3118465836,0.018046404<br/> C,0.4060900744,3.8396631111,1.2124852877</p> |



|                                                                                     |                                                                                                                                                                                                                                                                                                                                                                                                                                                                                                                                                                                                                                                                                                                                                                                                                                                                                                                                                                                                                                                                                                                                                                                                                                                                                                                                                                                                                                                                                                                                                                                                                                                                                                                                                          |
|-------------------------------------------------------------------------------------|----------------------------------------------------------------------------------------------------------------------------------------------------------------------------------------------------------------------------------------------------------------------------------------------------------------------------------------------------------------------------------------------------------------------------------------------------------------------------------------------------------------------------------------------------------------------------------------------------------------------------------------------------------------------------------------------------------------------------------------------------------------------------------------------------------------------------------------------------------------------------------------------------------------------------------------------------------------------------------------------------------------------------------------------------------------------------------------------------------------------------------------------------------------------------------------------------------------------------------------------------------------------------------------------------------------------------------------------------------------------------------------------------------------------------------------------------------------------------------------------------------------------------------------------------------------------------------------------------------------------------------------------------------------------------------------------------------------------------------------------------------|
|                                                                                     | <p>C,-4.3120187322,0.8683236664,1.7760864164<br/> H,-4.2622017664,1.9296415376,1.5648210608<br/> C,-3.684503594,-0.0788262885,0.9666184964<br/> C,-1.366613247,0.2406206954,0.0456465599<br/> C,0.3456483972,4.7000405146,2.3144193284<br/> H,-0.5748392483,5.243836111,2.5105544494<br/> C,-3.7068060996,-1.4522027694,1.2604411953<br/> C,1.623598897,3.1685253118,1.0003437534<br/> C,2.707613641,3.3041571639,1.8662168885<br/> H,3.6364359455,2.7682372707,1.7152477955<br/> C,1.4233221422,4.8725826214,3.1808736539<br/> Al,-0.9403982775,3.1948328199,-0.0402117164<br/> C,-5.0295799309,0.4370573993,2.890189965<br/> H,-5.5193957717,1.1730711189,3.5198255465<br/> C,-5.1180469808,-0.9188250873,3.1863421027<br/> C,-4.4524899368,-1.8401250679,2.3804350991<br/> H,-4.5023184781,-2.8944727492,2.6404873352<br/> C,2.5968639516,4.1611961869,2.9603208725<br/> H,3.4411698511,4.2668581909,3.6339981722<br/> C,4.2513939102,-3.0208484531,1.9449999376<br/> H,5.232742862,-2.5534288014,1.8960089788<br/> H,0.7767018034,-4.6715416822,2.1940700049<br/> H,2.6557709033,-5.5689533083,3.4991548969<br/> O,1.5001732484,1.924968022,-2.5078412146<br/> C,1.1345035533,2.588526395,-1.5656462242<br/> O,0.216797391,3.464339028,-1.5319536355<br/> O,-3.2195816074,-1.6330196797,-1.4548967712<br/> C,-2.9247109825,-0.4338120322,-1.6072774026<br/> O,-2.5839583338,0.2031131563,-2.581823556<br/> H,-5.4656490836,4.9260226557,-1.7034458957<br/> H,1.34286313,5.5466813148,4.0280385498<br/> H,7.0389455083,2.1878587188,-1.2458763276<br/> H,4.9210850834,-4.5376216392,3.3174682764<br/> H,-1.4255800422,-7.0570090876,-1.7485955646<br/> H,-5.6865998569,-1.2543176143,4.048386373<br/> Na,-0.7734419442,1.4181420249,-3.0591579004</p> |
| 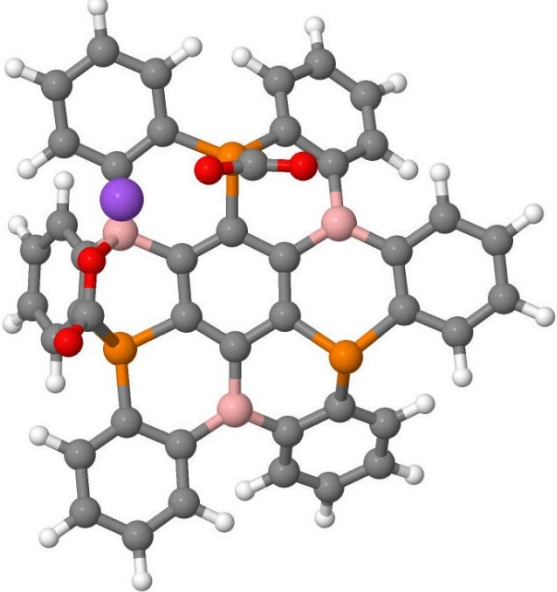 | <p><b>1CO<sub>2</sub>-B<sub>3</sub>P<sub>3</sub>-NG-Na inter</b><br/> <b>E=-3252.07621555H; FreqIm=0</b><br/> C,-0.3300641811,-5.4667296579,2.5689159151<br/> C,-1.3407242431,-3.5343210979,0.862060988<br/> C,0.0576380859,-3.769676696,0.8458550794<br/> C,-2.2107709879,-4.2562297318,1.6772767173<br/> C,-1.7008167177,-5.2323546419,2.5314956001<br/> P,3.3395436059,-0.7447777713,-0.9475683575<br/> P,-1.9072668186,-2.2122024916,-0.2179026549<br/> C,0.687285233,-1.3755662699,-0.1968965088<br/> C,2.4917739475,-3.3936410504,-0.3751704742<br/> C,1.6689098625,-0.3868258865,-0.3694746225<br/> C,-4.639625886,-2.3822445519,-0.0113163028<br/> H,-4.4816835579,-3.4540914737,-0.1071204178<br/> C,-3.5453714668,-1.5057194671,0.0609606169<br/> C,-0.6547249918,-0.9430534853,-0.0436006819<br/> C,2.7332346575,-4.7784929229,-0.4963065388<br/> H,1.9032447392,-5.4678575915,-0.3704901622<br/> C,-3.7256034626,-0.1045316143,0.0973831188<br/> C,3.5794048704,-2.5205309099,-0.6475269057<br/> C,4.8382111774,-3.0419291737,-0.9789036542<br/> H,5.6525073437,-2.3713677665,-1.2452112797<br/> C,3.9861445615,-5.2892816099,-0.807314815<br/> B,1.074759299,-2.883835617,0.0127311082<br/> C,-5.9378186373,-1.8852721534,-0.0065553195<br/> H,-6.7799724801,-2.5683960405,-0.0539229063<br/> C,-6.1456902018,-0.5061077273,0.0313445364</p>                                                                                                                                                                                                                                                                                                                                                                                                |

|  |                                                                                                                                                                                                                                                                                                                                                                                                                                                                                                                                                                                                                                                                                                                                                                                                                                                                                                                                                                                                                                                                                                                                                                                                                                                                                                                                                                                                                                                                                                                                                                                                                                                                                                                                                                                                                                                                                                                                                                                                                                                                                                                                                                                                                                                                                                                                                                                                                                                                                                                                                                                                                                       |
|--|---------------------------------------------------------------------------------------------------------------------------------------------------------------------------------------------------------------------------------------------------------------------------------------------------------------------------------------------------------------------------------------------------------------------------------------------------------------------------------------------------------------------------------------------------------------------------------------------------------------------------------------------------------------------------------------------------------------------------------------------------------------------------------------------------------------------------------------------------------------------------------------------------------------------------------------------------------------------------------------------------------------------------------------------------------------------------------------------------------------------------------------------------------------------------------------------------------------------------------------------------------------------------------------------------------------------------------------------------------------------------------------------------------------------------------------------------------------------------------------------------------------------------------------------------------------------------------------------------------------------------------------------------------------------------------------------------------------------------------------------------------------------------------------------------------------------------------------------------------------------------------------------------------------------------------------------------------------------------------------------------------------------------------------------------------------------------------------------------------------------------------------------------------------------------------------------------------------------------------------------------------------------------------------------------------------------------------------------------------------------------------------------------------------------------------------------------------------------------------------------------------------------------------------------------------------------------------------------------------------------------------------|
|  | <p> C,-5.0540851286,0.3588903105,0.0732080405<br/> H,-5.2288342517,1.4335243456,0.0974645631<br/> C,5.0513141343,-4.4149035285,-1.0243269073<br/> H,6.0360215601,-4.80057859,-1.2710067226<br/> B,-2.5379578254,0.981602807,0.1262144226<br/> C,-1.0401768979,0.3857469025,0.0038240812<br/> C,2.7867667589,5.8591958802,-1.0771862163<br/> C,0.7421914593,4.1226079024,-0.4173360905<br/> C,2.0701555137,3.6161553,-0.4044057801<br/> C,3.0743225172,4.532164835,-0.7536141862<br/> H,4.1046602744,4.1909596212,-0.7962198915<br/> C,0.4405956213,5.4493664308,-0.7301966702<br/> H,-0.5904997041,5.7947735743,-0.7420144654<br/> C,1.4747222536,6.3244533429,-1.0562198091<br/> H,1.2518513717,7.3560888535,-1.308380031<br/> P,-0.5929628715,2.9881717654,-0.1006978799<br/> C,1.3528163318,0.9939136238,-0.2644095141<br/> C,3.8281360568,1.639755905,0.4195297239<br/> C,-1.5894711741,4.1186600419,2.3038111299<br/> H,-0.8550376649,4.9175194935,2.2371548566<br/> C,-1.6673434555,3.1290905489,1.3274060674<br/> C,0.0121251917,1.3088850211,-0.086841857<br/> C,4.5965307131,2.480972439,1.2466874115<br/> H,4.2559990333,3.4962096847,1.434899119<br/> C,-2.5911999053,2.0618401411,1.3493955362<br/> C,4.2760440074,0.2997482896,0.2425300015<br/> C,5.4554087917,-0.1352588318,0.8437906355<br/> H,5.7944777903,-1.1588509674,0.7137081562<br/> C,5.761326098,2.0374196785,1.8651004162<br/> B,2.446599649,2.1056461748,-0.1235959496<br/> C,-2.4732233576,4.0468705273,3.3791615758<br/> H,-2.4396455108,4.7996595277,4.160067451<br/> C,-3.3910720771,2.9994850654,3.4498540519<br/> C,-3.4479985733,2.0220424814,2.452078999<br/> H,-4.1724178865,1.2159395938,2.5395767989<br/> C,6.1886384474,0.7277958877,1.6593568834<br/> H,7.0906592819,0.3668103769,2.1449399401<br/> C,0.5284330604,-4.7443345257,1.7408283209<br/> H,1.5964952947,-4.9250309282,1.8128320788<br/> H,-3.2753794686,-4.0438564372,1.6837264647<br/> H,-2.372356094,-5.7883495826,3.1781687614<br/> O,-2.7049280447,1.8377824599,-1.2243472521<br/> C,-1.8690106779,2.8201589979,-1.4916083357<br/> O,-1.8646807302,3.5094043108,-2.4743314798<br/> O,-0.8274010658,-3.3715188872,-2.3958518779<br/> C,-1.6812112069,-2.5482400295,-2.1683359499<br/> O,-2.3975941591,-1.7595318025,-2.8061925319<br/> H,3.5938473325,6.5314137748,-1.352043557<br/> H,6.3282653704,2.7043886616,2.5067488365<br/> H,4.1312281352,-6.3612102647,-0.8982151619<br/> H,0.0758269288,-6.2084582535,3.2499366021<br/> H,-7.1559290741,-0.1075379789,0.0215209898<br/> H,-4.0719515515,2.942352353,4.2940659374<br/> Na,-3.3740533724,0.1722080765,-2.6962288142 </p> |
|--|---------------------------------------------------------------------------------------------------------------------------------------------------------------------------------------------------------------------------------------------------------------------------------------------------------------------------------------------------------------------------------------------------------------------------------------------------------------------------------------------------------------------------------------------------------------------------------------------------------------------------------------------------------------------------------------------------------------------------------------------------------------------------------------------------------------------------------------------------------------------------------------------------------------------------------------------------------------------------------------------------------------------------------------------------------------------------------------------------------------------------------------------------------------------------------------------------------------------------------------------------------------------------------------------------------------------------------------------------------------------------------------------------------------------------------------------------------------------------------------------------------------------------------------------------------------------------------------------------------------------------------------------------------------------------------------------------------------------------------------------------------------------------------------------------------------------------------------------------------------------------------------------------------------------------------------------------------------------------------------------------------------------------------------------------------------------------------------------------------------------------------------------------------------------------------------------------------------------------------------------------------------------------------------------------------------------------------------------------------------------------------------------------------------------------------------------------------------------------------------------------------------------------------------------------------------------------------------------------------------------------------------|

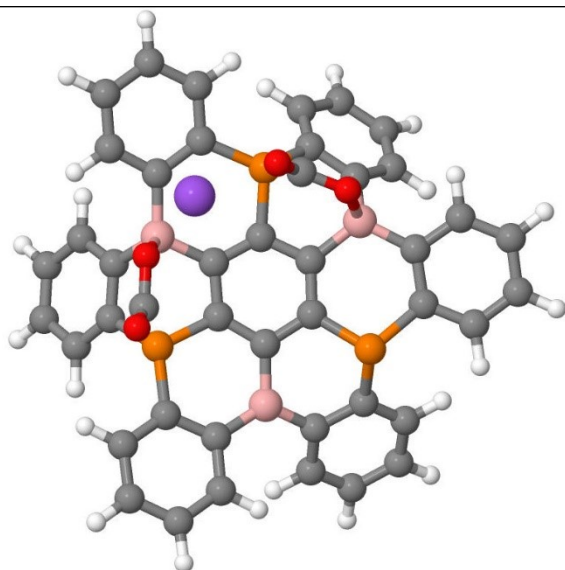

**2CO<sub>2</sub>-B<sub>3</sub>P<sub>3</sub>-NG-Na**

**E=-3252.07799989H; FreqIm=0**

C,-2.5107317557,-4.8073058025,2.6877806288  
 C,-2.8057899705,-2.7080982761,0.9642724951  
 C,-1.5978692979,-3.4372995614,0.8868019563  
 C,-3.8501416658,-2.9938509987,1.8434439357  
 C,-3.696426608,-4.0712859071,2.7100155107  
 P,2.6604622623,-1.8026966059,-0.484561396  
 P,-2.7154796314,-1.3120358796,-0.1355075521  
 C,-0.0742127254,-1.4072912405,0.0625921228  
 C,0.8107181313,-3.9528397997,-0.3256969657  
 C,1.2048290108,-0.8509647443,0.0204609231  
 C,-5.3188662281,-0.5977612229,-0.5983886828  
 H,-5.5204887052,-1.6662790455,-0.5581240445  
 C,-4.024813308,-0.1107121403,-0.3576115006  
 C,-1.1525149436,-0.5093451433,0.1669674139  
 C,0.5607486522,-5.3239397644,-0.5070795184  
 H,-0.4729160166,-5.6574955278,-0.5822685686  
 C,-3.7080885117,1.2696505536,-0.4204303894  
 C,2.1676471357,-3.5509486515,-0.2745256697  
 C,3.1941857858,-4.5011772047,-0.4016021567  
 H,4.2327329111,-4.1796878918,-0.4430807241  
 C,1.577137309,-6.2687082396,-0.5995070552  
 B,-0.442377027,-2.9708242273,-0.1806432202  
 C,-6.3426597993,0.2885569004,-0.9102444455  
 H,-7.34652483,-0.0817733432,-1.091427974  
 C,-6.0616180961,1.652379348,-1.0048273685  
 C,-4.7704009996,2.1227188685,-0.7690955191  
 H,-4.5733248109,3.1903756519,-0.8464080848  
 C,2.9062064469,-5.8544183845,-0.5310831962  
 H,3.7140111387,-6.575282818,-0.6145073888  
 B,-2.2441406707,1.920201559,-0.1738083031  
 C,-1.0610071436,0.8702269421,0.147755592  
 C,4.6077675371,4.4943531492,-0.6208784992  
 C,2.0023334665,3.6475943948,-0.2536985179  
 C,3.0440138963,2.7052830612,-0.020133736  
 C,4.3477005733,3.1795190537,-0.230208595  
 H,5.1800865704,2.4926178228,-0.1085464685  
 C,2.2486982377,4.965306639,-0.6430460056  
 H,1.4246639715,5.6509258197,-0.827861324  
 C,3.5633381648,5.3927030802,-0.8187632161  
 H,3.7647397568,6.4139820012,-1.1252968842  
 P,0.3116076818,3.0945864495,-0.1379590592  
 C,1.3952810281,0.5478363189,0.1427340915  
 C,3.8695433382,0.239215597,0.9874731244  
 C,-0.6656823983,4.9368136663,1.7846043095  
 H,0.3098223535,5.4154036108,1.821065168  
 C,-0.9055691464,3.8578121444,0.9377714158  
 C,0.2539113989,1.3462913105,0.1755702225  
 C,4.812302183,0.7482189807,1.9009207586  
 H,4.8597622714,1.8208137322,2.0741894709  
 C,-2.1465082643,3.185204593,0.8466522233  
 C,3.7963839649,-1.1777188928,0.8270198181  
 C,4.6597382657,-2.0067676933,1.540684242  
 H,4.5996124585,-3.0853025122,1.4314286945  
 C,5.6567563547,-0.0863582575,2.6264068542  
 B,2.812511821,1.1795090485,0.3391930596  
 C,-1.7062851597,5.3775500449,2.6005220436  
 H,-1.5504370134,6.214386011,3.2735552871  
 C,-2.9400601194,4.7306015974,2.5550685911  
 C,-3.1546801009,3.6504606871,1.6940906479  
 H,-4.126225398,3.1621130614,1.691093218  
 C,5.5764616047,-1.4646209307,2.4428342287

|                                                                                    |                                                                                                                                                                                                                                                                                                                                                                                                                                                                                                                                                                                                                                                                                                                                                                                                                                                                                                                                                                                                                                                                                                                                                                                                                                                                                                                                                                                                                                                                                                                                                                                                                                                                                                                                                                                                                                                                                                                                                                                                                                                                                                                                                                                                             |
|------------------------------------------------------------------------------------|-------------------------------------------------------------------------------------------------------------------------------------------------------------------------------------------------------------------------------------------------------------------------------------------------------------------------------------------------------------------------------------------------------------------------------------------------------------------------------------------------------------------------------------------------------------------------------------------------------------------------------------------------------------------------------------------------------------------------------------------------------------------------------------------------------------------------------------------------------------------------------------------------------------------------------------------------------------------------------------------------------------------------------------------------------------------------------------------------------------------------------------------------------------------------------------------------------------------------------------------------------------------------------------------------------------------------------------------------------------------------------------------------------------------------------------------------------------------------------------------------------------------------------------------------------------------------------------------------------------------------------------------------------------------------------------------------------------------------------------------------------------------------------------------------------------------------------------------------------------------------------------------------------------------------------------------------------------------------------------------------------------------------------------------------------------------------------------------------------------------------------------------------------------------------------------------------------------|
|                                                                                    | <p>H,6.2207421493,-2.1277644919,3.0129644658<br/> C,-1.4815993322,-4.4937486082,1.7982207107<br/> H,-0.5672125641,-5.0797349045,1.8174471281<br/> H,-4.7506760291,-2.3853752149,1.8672483546<br/> H,-4.487948225,-4.3252384964,3.4076860528<br/> O,-1.8113529294,2.4728388524,-1.6230803704<br/> C,-0.6408991749,3.0672212033,-1.7793004144<br/> O,-0.1951695349,3.4865267474,-2.8119264852<br/> O,-1.2162784623,-2.8882069538,-1.6353484159<br/> C,-2.1148197165,-2.0020715135,-1.7909203278<br/> O,-2.499942002,-1.459935865,-2.8249526731<br/> H,5.6331765913,4.8144441162,-0.7786167222<br/> H,6.3652557094,0.3326762431,3.3338754319<br/> H,1.3368201878,-7.3184272853,-0.73992265<br/> H,-2.3848605792,-5.6366133007,3.3777864829<br/> H,-6.8524590218,2.350746887,-1.2627520358<br/> H,-3.7457176959,5.0694022596,3.1997276584<br/> Na,-2.5930267076,0.7930503399,-3.0576212086</p>                                                                                                                                                                                                                                                                                                                                                                                                                                                                                                                                                                                                                                                                                                                                                                                                                                                                                                                                                                                                                                                                                                                                                                                                                                                                                                                  |
| 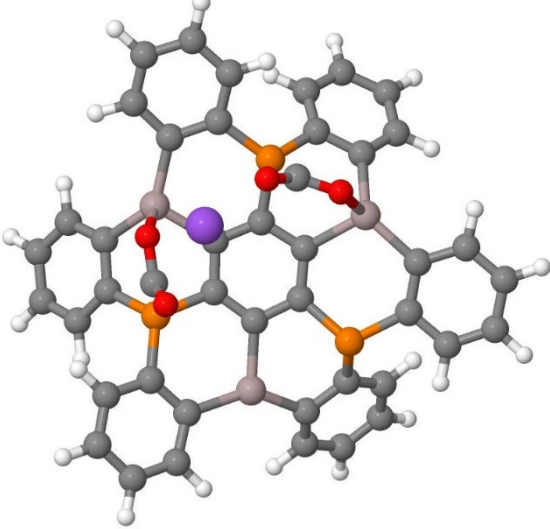 | <p><b>2CO<sub>2</sub>-Al<sub>3</sub>P<sub>3</sub>-NG-Na</b><br/> <b>E=-3904.75700286H; FreqIm=0</b><br/> C,-5.707177001,2.1914200874,-2.639043338<br/> C,-4.1560134837,0.6536209219,-0.9478759431<br/> C,-3.8110709909,2.0194606381,-1.104284781<br/> C,-5.2309411182,0.0601299707,-1.6182721571<br/> C,-6.0096269074,0.8423964388,-2.4677854112<br/> P,1.2647048815,2.799755694,0.0906418901<br/> P,-3.0986978098,-0.3506128431,0.131518495<br/> C,-0.8838558668,1.0833069683,-0.4185635843<br/> C,-1.2039915186,4.2386232551,0.1273987921<br/> C,0.4998877396,1.1971557843,-0.3541918607<br/> C,-5.075210398,-1.9656251803,1.0312843033<br/> H,-5.579034066,-1.0227401819,1.2362919093<br/> C,-3.7838537315,-1.9843182408,0.4872541206<br/> C,-1.3441245012,-0.2525602475,-0.3486305344<br/> C,-1.8644770797,5.4649222979,0.3149376031<br/> H,-2.9485002228,5.5059447979,0.2230770548<br/> C,-3.1009641506,-3.1975022384,0.2212774395<br/> C,0.2050097734,4.2606136099,0.25535012<br/> C,0.8977749837,5.4345069639,0.5922130518<br/> H,1.9791633257,5.4266867162,0.711736243<br/> C,-1.1843338239,6.6412766704,0.6254185917<br/> Al,-2.1783109722,2.5547827058,-0.1254666299<br/> C,-5.7254347332,-3.1638407288,1.310956766<br/> H,-6.723234472,-3.1494490191,1.7377203133<br/> C,-5.0898814689,-4.3733460788,1.0396593703<br/> C,-3.8004641547,-4.381054969,0.5078788647<br/> H,-3.3229397531,-5.3411312663,0.3228911731<br/> C,0.2009311439,6.6238285348,0.7758321898<br/> H,0.7393054819,7.5300552562,1.0347550577<br/> Al,-1.2122272787,-3.197548149,-0.3060485417<br/> C,-0.5252508022,-1.373792985,-0.2425589415<br/> C,6.3964193321,-2.3507086707,0.7625045298<br/> C,3.615083317,-2.4127004142,0.3754894633<br/> C,4.267318899,-1.1589730923,0.4813959131<br/> C,5.6624935129,-1.1720601111,0.6691363689<br/> H,6.1971227688,-0.2263675951,0.7528515158<br/> C,4.3532000085,-3.6014709415,0.5133319639<br/> H,3.8463272924,-4.5646748989,0.4897811114<br/> C,5.7320446485,-3.5735348033,0.6888613089<br/> H,6.2825060851,-4.5052776873,0.780500289<br/> P,1.7927350859,-2.6899431493,0.3411431744<br/> C,1.4191141585,0.1266899954,-0.219780483<br/> C,3.7768406553,2.1173176577,-0.774519336</p> |

|                                                                                     |                                                                                                                                                                                                                                                                                                                                                                                                                                                                                                                                                                                                                                                                                                                                                                                                                                                                                                                                                                                                                                                                                                                                                                                                                                                                                                                                                                                                                                                                                                                                                                                                                                                                                                                                                                |
|-------------------------------------------------------------------------------------|----------------------------------------------------------------------------------------------------------------------------------------------------------------------------------------------------------------------------------------------------------------------------------------------------------------------------------------------------------------------------------------------------------------------------------------------------------------------------------------------------------------------------------------------------------------------------------------------------------------------------------------------------------------------------------------------------------------------------------------------------------------------------------------------------------------------------------------------------------------------------------------------------------------------------------------------------------------------------------------------------------------------------------------------------------------------------------------------------------------------------------------------------------------------------------------------------------------------------------------------------------------------------------------------------------------------------------------------------------------------------------------------------------------------------------------------------------------------------------------------------------------------------------------------------------------------------------------------------------------------------------------------------------------------------------------------------------------------------------------------------------------|
|                                                                                     | <p>C,2.4143445762,-4.3375729652,-1.9387749919<br/> H,3.4334548466,-3.9663833357,-1.8785136137<br/> C,1.4340483506,-3.8514090347,-1.074381127<br/> C,0.8781094877,-1.1607859968,-0.1960739832<br/> C,4.9224928525,2.3362574218,-1.5515268955<br/> H,5.7300660774,1.6076455057,-1.5286095102<br/> C,0.0969039254,-4.3237227378,-1.1829115167<br/> C,2.7687969779,3.104948894,-0.86844773<br/> C,2.8729521481,4.227833346,-1.6983824388<br/> H,2.0672251355,4.9531520711,-1.772436121<br/> C,5.0581234472,3.4600185458,-2.3675875464<br/> Al,3.2987971636,0.5217491414,0.30809385<br/> C,2.0943087028,-5.3051882554,-2.8955662547<br/> H,2.8694696201,-5.6751507946,-3.5605885763<br/> C,0.7955403027,-5.7906872685,-3.0018061353<br/> C,-0.1969433954,-5.2834930248,-2.1607514123<br/> H,-1.2149738868,-5.6529106252,-2.2729351332<br/> C,4.0325335908,4.401420756,-2.4481927399<br/> H,4.1307337249,5.2663303707,-3.0967352815<br/> C,-4.6224200359,2.7624327234,-1.9701958222<br/> H,-4.4062892587,3.8156274124,-2.1358707507<br/> H,-5.4610972142,-0.9942779195,-1.4907137986<br/> H,-6.846716978,0.3959359863,-2.9950489962<br/> O,0.925381192,2.4446953346,2.7339056062<br/> C,1.732176279,2.1899883719,1.8412548847<br/> O,2.7560828723,1.4431116952,1.9000735961<br/> O,-2.6504981346,1.8945439797,1.5958575716<br/> C,-2.8718304473,0.6226452378,1.7521816779<br/> O,-2.7568704165,0.036870073,2.8125002382<br/> H,7.4722681615,-2.3184217657,0.9071294205<br/> H,5.9627200641,3.598722813,-2.9528537816<br/> H,-1.7336151394,7.5684207854,0.7605260581<br/> H,-6.3159877877,2.8003628434,-3.3010221675<br/> H,-5.595043748,-5.3108707968,1.2517604661<br/> H,0.55291058,-6.5505628039,-3.7384937028<br/> Na,-1.0970724252,1.8003375432,3.3898172122</p> |
| 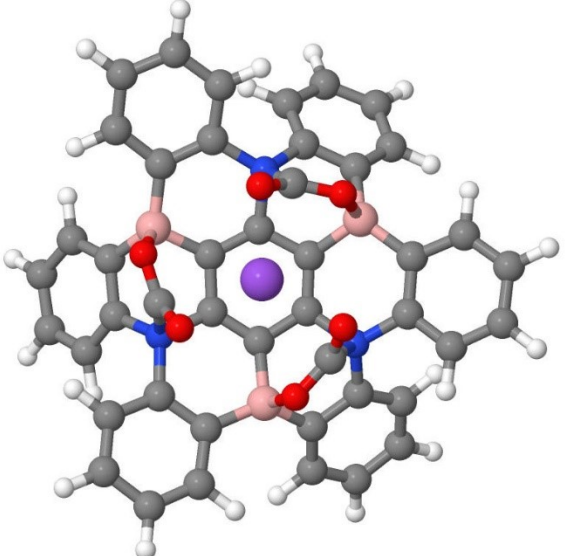 | <p><b>3CO<sub>2</sub>-B<sub>3</sub>N<sub>3</sub>-NG-Na</b><br/> <b>E=-2580.79878993H ; FreqIm=0</b><br/> C,5.3012333064,-1.1568154938,2.6134374701<br/> C,3.2276020004,-1.6907363982,0.8818658673<br/> C,3.7278729007,-0.382354863,0.9365375102<br/> C,3.6916378414,-2.7163114235,1.693558923<br/> C,4.7491840729,-2.4336216428,2.5605733485<br/> N,0.6208042842,2.7001659771,-0.0342366076<br/> N,2.0281802545,-1.8874937323,-0.0331648898<br/> C,1.3627571011,0.3695369537,0.4424598741<br/> C,3.1132564556,2.1744950533,-0.2052213885<br/> C,0.3639083626,1.2992037693,0.4444377654<br/> C,2.6927689508,-4.1213742553,-0.7405690957<br/> H,3.694639408,-3.7136828953,-0.8474767724<br/> C,1.6458970667,-3.3159692838,-0.2920628038<br/> C,0.9428077381,-0.9645942725,0.4446562798<br/> C,4.3877192572,2.6780443246,-0.5130839701<br/> H,5.2343968154,1.9970544271,-0.463025814<br/> C,0.3268272239,-3.7830649087,-0.2068957428<br/> C,2.0491610517,3.0829894164,-0.2926798639<br/> C,2.2234477365,4.3917222368,-0.7428305348<br/> H,1.3694302652,5.0552337775,-0.8514492283<br/> C,4.592176547,3.9924310411,-0.9138711046<br/> C,2.4515243168,-5.4544196482,-1.0442233437<br/> H,3.2679269391,-6.0822342451,-1.3862257988<br/> C,1.1625309046,-5.9727563586,-0.9147403875<br/> C,0.1259500579,-5.1383993067,-0.5154945305</p>                                                                                                                                                                                                                                                                                                                                                                                                                               |

|  |                                                                                                                                                                                                                                                                                                                                                                                                                                                                                                                                                                                                                                                                                                                                                                                                                                                                                                                                                                                                                                                                                                                                                                                                                                                                                                                                                                                                                                                                                                                                                                                                                                                                                                                                                                                                                                                                                                                                                                                                                                                                                                                                                                                                                                                                                                                                                                                                                                                                                                                                                                                                                                                                                                                                                                                                                 |
|--|-----------------------------------------------------------------------------------------------------------------------------------------------------------------------------------------------------------------------------------------------------------------------------------------------------------------------------------------------------------------------------------------------------------------------------------------------------------------------------------------------------------------------------------------------------------------------------------------------------------------------------------------------------------------------------------------------------------------------------------------------------------------------------------------------------------------------------------------------------------------------------------------------------------------------------------------------------------------------------------------------------------------------------------------------------------------------------------------------------------------------------------------------------------------------------------------------------------------------------------------------------------------------------------------------------------------------------------------------------------------------------------------------------------------------------------------------------------------------------------------------------------------------------------------------------------------------------------------------------------------------------------------------------------------------------------------------------------------------------------------------------------------------------------------------------------------------------------------------------------------------------------------------------------------------------------------------------------------------------------------------------------------------------------------------------------------------------------------------------------------------------------------------------------------------------------------------------------------------------------------------------------------------------------------------------------------------------------------------------------------------------------------------------------------------------------------------------------------------------------------------------------------------------------------------------------------------------------------------------------------------------------------------------------------------------------------------------------------------------------------------------------------------------------------------------------------|
|  | <p> H,-0.8872880026,-5.5309987176,-0.4672095129<br/> C,3.4987520343,4.8491524235,-1.0457347536<br/> H,3.6344323237,5.8696645359,-1.3889363046<br/> C,-0.3616954946,-1.3648765832,0.4413933627<br/> C,-5.7533000645,1.9805532405,-0.91698472<br/> C,-3.6943823268,0.233174741,-0.2946191335<br/> C,-3.4395930352,1.608986042,-0.2077650743<br/> C,-4.5128260929,2.4608241098,-0.5162101877<br/> H,-4.3463799433,3.5345708277,-0.4664879647<br/> C,-4.9148793466,-0.270438344,-0.7446714848<br/> H,-5.0624641582,-1.3418554979,-0.8527702639<br/> C,-5.9485816348,0.6051878735,-1.0482140308<br/> H,-6.9001629589,0.212313179,-1.3913980747<br/> N,-2.6487294869,-0.8123429391,-0.0356262838<br/> C,-1.0014590369,0.9957070976,0.4409858149<br/> C,-1.5330170361,3.4201528969,0.9340779522<br/> C,-4.1998961776,-1.8403792895,1.6885543233<br/> H,-4.8386789487,-0.9656572869,1.672364468<br/> C,-3.0788034427,-1.9502490015,0.8780028714<br/> C,-1.3071627374,-0.334137618,0.4435441804<br/> C,-2.2728356028,4.210860536,1.8115509847<br/> H,-3.3464301727,4.0577783373,1.8878281144<br/> C,-2.1957561824,-3.0376723339,0.9323819131<br/> C,-0.1497695072,3.6411897001,0.8796261095<br/> C,0.506036977,4.5566544963,1.6906483498<br/> H,1.5829191271,4.6725763984,1.6746813612<br/> C,-1.6495325891,5.1711444848,2.6097502779<br/> C,-4.4844942938,-2.8985264868,2.5542583606<br/> H,-5.3583913863,-2.8352268158,3.1944788597<br/> C,-3.6545632772,-4.0148750296,2.606908612<br/> C,-2.5109262048,-4.0741546463,1.80919276<br/> H,-1.8415938371,-4.9274033549,1.8853367042<br/> C,-0.2678071605,5.3317276907,2.5569498267<br/> H,0.2241493147,6.0564157706,3.1975650412<br/> C,4.7819810081,-0.1369480035,1.8146767048<br/> H,5.1862678449,0.8693118871,1.8910578853<br/> H,3.253284938,-3.7067776878,1.6772579488<br/> H,5.1301860255,-3.2219000695,3.2017004194<br/> O,0.6163999139,2.1930127669,-2.3839712296<br/> C,-0.1038820152,2.5131946847,-1.4704894566<br/> O,-1.360791071,2.5803974439,-1.4007611849<br/> O,-1.5524702422,-2.4678939415,-1.4017020813<br/> C,-2.1237419834,-1.3462476397,-1.471452972<br/> O,-2.2066827674,-0.5624872743,-2.3850720121<br/> O,2.9155279252,-0.1109939677,-1.3986601363<br/> C,2.2298419701,-1.1664994821,-1.4689702187<br/> O,1.5939847835,-1.6307414133,-2.3833435751<br/> H,-6.5580740962,2.6702586965,-1.1515913781<br/> H,-2.2389408577,5.7794465131,3.2887994839<br/> H,5.5919430118,4.3445425534,-1.1481154351<br/> H,6.1223845124,-0.9506320007,3.2929512588<br/> H,0.967752722,-7.0145342959,-1.1495817791<br/> H,-3.8870508044,-4.8297574367,3.2854870708<br/> B,2.8765441336,0.6255131474,0.0420233104<br/> B,-1.9798655622,2.1786111791,0.0398300321<br/> B,-0.8964807904,-2.8035213255,0.0392925825<br/> Na,0.0016789039,-0.0019988498,-3.2015431879 </p> |
|--|-----------------------------------------------------------------------------------------------------------------------------------------------------------------------------------------------------------------------------------------------------------------------------------------------------------------------------------------------------------------------------------------------------------------------------------------------------------------------------------------------------------------------------------------------------------------------------------------------------------------------------------------------------------------------------------------------------------------------------------------------------------------------------------------------------------------------------------------------------------------------------------------------------------------------------------------------------------------------------------------------------------------------------------------------------------------------------------------------------------------------------------------------------------------------------------------------------------------------------------------------------------------------------------------------------------------------------------------------------------------------------------------------------------------------------------------------------------------------------------------------------------------------------------------------------------------------------------------------------------------------------------------------------------------------------------------------------------------------------------------------------------------------------------------------------------------------------------------------------------------------------------------------------------------------------------------------------------------------------------------------------------------------------------------------------------------------------------------------------------------------------------------------------------------------------------------------------------------------------------------------------------------------------------------------------------------------------------------------------------------------------------------------------------------------------------------------------------------------------------------------------------------------------------------------------------------------------------------------------------------------------------------------------------------------------------------------------------------------------------------------------------------------------------------------------------------|

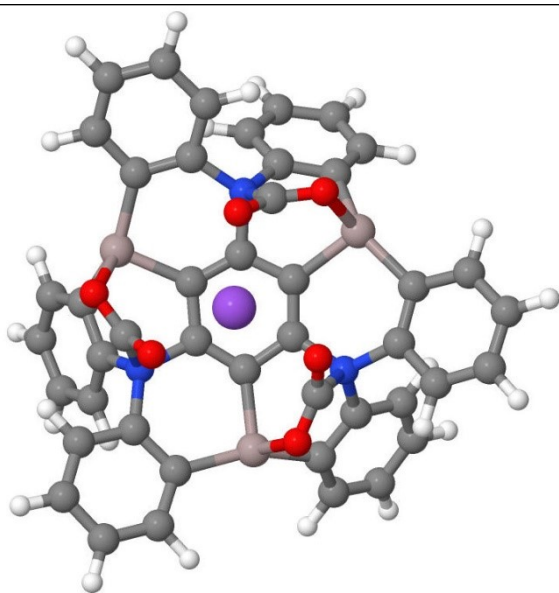

**3CO<sub>2</sub>-Al<sub>3</sub>N<sub>3</sub>-NG-Na**

**E=-3233.46013109H; FreqIm=0**

C,-2.201582537,-4.7532834448,3.1588562184  
 C,-2.1007527224,-2.9750554267,1.0341864954  
 C,-1.0054051317,-3.8345768301,1.2338976197  
 C,-3.1989440814,-2.9549107161,1.892839343  
 C,-3.2419427061,-3.8521089506,2.9578150699  
 N,2.7092620402,-0.8404923239,-0.092659703  
 N,-2.0817859241,-1.9259119932,-0.0927209336  
 C,0.2665259247,-1.397894127,0.2626445062  
 C,2.3580240557,-3.4263192868,-0.3647397009  
 C,1.2649382721,-0.4631791917,0.2569693504  
 C,-4.1826488282,-2.7031946155,-0.9655654179  
 H,-3.6668261929,-3.6594338347,-1.0322384819  
 C,-3.514394495,-1.5771246618,-0.4750807916  
 C,-1.0330304704,-0.8637457815,0.2571927214  
 C,3.0068339935,-4.6207294006,-0.74464722  
 H,2.4586440887,-5.5577510258,-0.6761230625  
 C,-4.1458476322,-0.3291650543,-0.3645704137  
 C,3.1235602523,-2.2557468686,-0.4743110632  
 C,4.4333297544,-2.2718364917,-0.9638788265  
 H,5.0039889629,-1.3472305034,-1.0299959923  
 C,4.3124320559,-4.6590492859,-1.2160610108  
 Al,0.4535176406,-3.3277894495,0.0396784174  
 C,-5.5153128345,-2.6194809874,-1.3392458092  
 H,-6.0224779268,-3.5010498086,-1.7179303034  
 C,-6.1901513133,-1.4054689769,-1.216669243  
 C,-5.5046864304,-0.2940393345,-0.7443643444  
 H,-6.0424251907,0.648943976,-0.6749198931  
 C,5.0270052485,-3.4679278575,-1.3375726352  
 H,6.0442990012,-3.4666746024,-1.7156398175  
 Al,-3.1083763639,1.2709488208,0.0400812129  
 C,-1.3434397038,0.4681648397,0.2621564646  
 C,1.8778896326,6.0641828233,-1.2159155325  
 C,0.3915089784,3.832695762,-0.4739217565  
 C,1.7880524194,3.7549715401,-0.3652641927  
 C,2.4978575902,4.9141856351,-0.7453216714  
 H,3.5834716325,4.9079601934,-0.6774628424  
 C,-0.2498102287,4.9750845999,-0.962824623  
 H,-1.3359140822,5.0067787356,-1.0282621338  
 C,0.4890328455,6.0874145115,-1.3365980083  
 H,-0.0209454566,6.9679694266,-1.7139273487  
 N,-0.6266421372,2.7660854423,-0.0918272456  
 C,1.0776001488,0.9293385292,0.2618446438  
 C,3.8238321071,1.0466077667,1.2327788109  
 C,-0.9602611625,4.2477786529,1.8943493482  
 H,0.0496863095,4.6142461223,1.7523321454  
 C,-1.5257895822,3.306411171,1.035480926  
 C,-0.2310600217,1.3265803945,0.2571914216  
 C,4.642986068,1.4135781696,2.307393585  
 H,4.8289972298,2.4682137089,2.4940022707  
 C,-2.8176721638,2.786972347,1.234864529  
 C,3.6270129589,-0.3318685304,1.0341468588  
 C,4.1584510741,-1.2923384042,1.8937532835  
 H,3.9699456159,-2.3501039045,1.7520528372  
 C,5.216750726,0.4717233948,3.1587235751  
 Al,2.6553968172,2.0563003309,0.0385166974  
 C,-1.7164594187,4.7329203249,2.9592573486  
 H,-1.2782753957,5.4679207812,3.6268506277  
 C,-3.0167738162,4.281542287,3.1600627541  
 C,-3.5450247848,3.3127554008,2.3095564951  
 H,-4.5509626663,2.9457030193,2.4967354064  
 C,4.9564969663,-0.8800132167,2.9587409688

|                                                                                    |                                                                                                                                                                                                                                                                                                                                                                                                                                                                                                                                                                                                                                                                                                                                                                                                                                                                                                                                                                                                                                                                                                                                                                                                                                                                                                                                                                                                                                                                                                                                                                                                                                                                                                                                                                                                                                                                                                                                                                                                                                                                       |
|------------------------------------------------------------------------------------|-----------------------------------------------------------------------------------------------------------------------------------------------------------------------------------------------------------------------------------------------------------------------------------------------------------------------------------------------------------------------------------------------------------------------------------------------------------------------------------------------------------------------------------------------------------------------------------------------------------------------------------------------------------------------------------------------------------------------------------------------------------------------------------------------------------------------------------------------------------------------------------------------------------------------------------------------------------------------------------------------------------------------------------------------------------------------------------------------------------------------------------------------------------------------------------------------------------------------------------------------------------------------------------------------------------------------------------------------------------------------------------------------------------------------------------------------------------------------------------------------------------------------------------------------------------------------------------------------------------------------------------------------------------------------------------------------------------------------------------------------------------------------------------------------------------------------------------------------------------------------------------------------------------------------------------------------------------------------------------------------------------------------------------------------------------------------|
|                                                                                    | <p>H,5.3730063818,-1.626861943,3.6271055668<br/> C,-1.0981430173,-4.7273034181,2.3086296214<br/> H,-0.2778436117,-5.415490904,2.496260716<br/> H,-4.0204694546,-2.2626254602,1.7506078889<br/> H,-4.0976201199,-3.8392939988,3.6253611908<br/> O,2.1744446607,-0.6372815624,-2.405579021<br/> C,2.7530651889,-0.0458759016,-1.5262104506<br/> O,3.2724621053,1.0937414253,-1.4828134186<br/> O,-2.5839885892,2.2877078,-1.480988978<br/> C,-1.3373333415,2.4069984179,-1.5248432583<br/> O,-0.536178683,2.2011653702,-2.4044549556<br/> O,-0.6883674395,-3.3814731137,-1.4816759781<br/> C,-1.4152549838,-2.3616910292,-1.5257303671<br/> O,-1.6373274082,-1.5651280221,-2.4055553107<br/> H,2.4683556012,6.9307162039,-1.4965378793<br/> H,5.8479978444,0.7908345846,3.9824135276<br/> H,4.7673794306,-5.603851515,-1.4965214545<br/> H,-2.2416370407,-5.4593750889,3.9826290124<br/> H,-7.2359098545,-1.3273909385,-1.4969858583<br/> H,-3.6087148897,4.6688085469,3.9837214682<br/> Na,-0.0007559586,0.0009017267,-2.9761969845</p>                                                                                                                                                                                                                                                                                                                                                                                                                                                                                                                                                                                                                                                                                                                                                                                                                                                                                                                                                                                                                                |
| 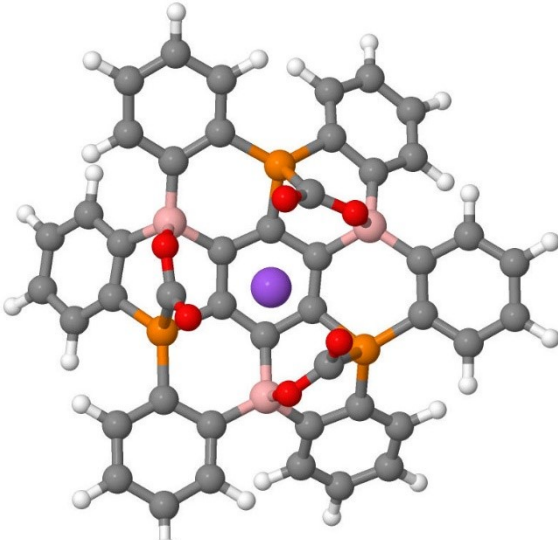 | <p><b>3CO<sub>2</sub>-B<sub>3</sub>P<sub>3</sub>-NG-Na</b><br/> <b>E=-3440.61979326H; FreqIm=0</b><br/> C,2.7173680371,5.1620800934,2.4930411632<br/> C,2.8618986765,2.9067693505,0.9354772597<br/> C,1.6295351226,3.5988016331,0.9710394601<br/> C,3.9973355409,3.3092081648,1.6387278501<br/> C,3.9206887644,4.4619644245,2.4156491136<br/> P,-2.5389975863,1.6645146582,0.0353717692<br/> P,2.7117061118,1.3671031972,0.035081327<br/> C,0.1283874481,1.4268890675,0.6470846977<br/> C,-0.9223073061,3.8863915016,-0.0975434262<br/> C,-1.1062424269,0.7998439372,0.6805202484<br/> C,5.326785531,0.7827742781,-0.5023356006<br/> H,5.4662239702,1.8590659802,-0.5753575063<br/> C,4.0748355598,0.2445741469,-0.1683700178<br/> C,1.2465250683,0.5584877537,0.6794685689<br/> C,-0.7596891028,5.2475234117,-0.3964769639<br/> H,0.2437904473,5.6653204886,-0.4018209985<br/> C,3.8266753189,-1.1443699166,-0.0995765915<br/> C,-2.2490295981,3.4065435226,-0.167730328<br/> C,-3.3411872566,4.2214452765,-0.5017682644<br/> H,-4.3427776725,3.8037358272,-0.5760057671<br/> C,-1.833249107,6.0766547595,-0.7129786211<br/> B,0.3864657437,2.9670399536,0.1346862898<br/> C,6.3884893318,-0.0723300404,-0.7629884189<br/> H,7.3631712632,0.3304399867,-1.0183352209<br/> C,6.1786077931,-1.4508697751,-0.7162878549<br/> C,4.9237992529,-1.9658515936,-0.3996121754<br/> H,4.7833931177,-3.043752125,-0.4057907644<br/> C,-3.1318120761,5.5687400339,-0.7610262332<br/> H,-3.968051165,6.2114107795,-1.0162109934<br/> B,2.376367026,-1.818282326,0.1330144276<br/> C,1.1719241341,-0.8242964689,0.6456290636<br/> C,-4.3459613872,-4.6263231166,-0.71230623<br/> C,-1.82556018,-3.6515303299,-0.1669586006<br/> C,-2.9043174723,-2.7421853918,-0.0977272996<br/> C,-4.1644150052,-3.2818821093,-0.3966694573<br/> H,-5.027844219,-2.6215671821,-0.4027236385<br/> C,-1.985531623,-5.0050558586,-0.4998936124<br/> H,-1.123159049,-5.6639587938,-0.5729490479<br/> C,-3.2570587805,-5.4973071047,-0.7592005663<br/> H,-3.3957433705,-6.5430385665,-1.0134955971</p> |



|                                                                                     |                                                                                                                                                                                                                                                                                                                                                                                                                                                                                                                                                                                                                                                                                                                                                                                                                                                                                                                                                                                                                                                                                                                                                                                                                                                                                                                                                                                                                                                                                                                                                                                                                                                                                                                                                                                                                                                                                                                                                                                                                                                                   |
|-------------------------------------------------------------------------------------|-------------------------------------------------------------------------------------------------------------------------------------------------------------------------------------------------------------------------------------------------------------------------------------------------------------------------------------------------------------------------------------------------------------------------------------------------------------------------------------------------------------------------------------------------------------------------------------------------------------------------------------------------------------------------------------------------------------------------------------------------------------------------------------------------------------------------------------------------------------------------------------------------------------------------------------------------------------------------------------------------------------------------------------------------------------------------------------------------------------------------------------------------------------------------------------------------------------------------------------------------------------------------------------------------------------------------------------------------------------------------------------------------------------------------------------------------------------------------------------------------------------------------------------------------------------------------------------------------------------------------------------------------------------------------------------------------------------------------------------------------------------------------------------------------------------------------------------------------------------------------------------------------------------------------------------------------------------------------------------------------------------------------------------------------------------------|
|                                                                                     | <p>P,-0.1718460899,-3.0318770874,0.0354071904<br/> C,-1.2995333411,-0.6026397757,0.6474697528<br/> C,-3.9318938655,-0.3883800809,0.9693799671<br/> C,0.868082502,-5.1155040482,1.6396731742<br/> H,-0.0934842533,-5.6204547561,1.6064361465<br/> C,1.0868681688,-3.9313185316,0.9357153159<br/> C,-0.1391462021,-1.3582954871,0.6792949408<br/> C,-4.8963846012,-0.9885953663,1.7848862355<br/> H,-4.9147769707,-2.0705350727,1.8857011467<br/> C,2.3024605336,-3.2102647842,0.9699328262<br/> C,-3.9482972696,1.0248886951,0.9340974088<br/> C,-4.8653770052,1.8073187321,1.635952466<br/> H,-4.8213119691,2.8924855164,1.602112642<br/> C,-5.8319589832,-0.2273389968,2.4884335603<br/> B,-2.762423062,-1.1490728624,0.1342609294<br/> C,1.9053265344,-5.6252062955,2.4160316291<br/> H,1.7639516011,-6.5460306145,2.9725979125<br/> C,3.1135428248,-4.9334015168,2.4918394179<br/> C,3.3047916956,-3.7438283401,1.7859925801<br/> H,4.2510176298,-3.2184807248,1.8852058132<br/> C,-5.8268382025,1.1648309611,2.4112034986<br/> H,-6.5544652199,1.7482412982,2.9660407653<br/> C,1.5909923539,4.733096403,1.7879963897<br/> H,0.6629707997,5.2896520022,1.8887064314<br/> H,4.9153868482,2.7289520581,1.6047276391<br/> H,4.7892769216,4.7998091497,2.9715892511<br/> O,-1.9567220545,1.0982434194,-2.5815616731<br/> C,-2.456778725,0.6499589519,-1.5640556496<br/> O,-2.7891585263,-0.5758806403,-1.3515308451<br/> O,1.8936976492,-2.1308705223,-1.3522552942<br/> C,0.6656808947,-2.4554370772,-1.5643789565<br/> O,0.0272423438,-2.2468882031,-2.5819003239<br/> O,0.8972823415,2.7054773002,-1.3509946177<br/> C,1.7928726213,1.8051443684,-1.5642468387<br/> O,1.931936493,1.1493794616,-2.5825853536<br/> H,-5.3419602599,-4.9963472405,-0.937353001<br/> H,-6.5691496162,-0.7263075522,3.1106358449<br/> H,-1.6558947183,7.1242944994,-0.9378942638<br/> H,2.6531010988,6.0491139229,3.1164558144<br/> H,6.9968610201,-2.1283371054,-0.9422926715<br/> H,3.9143732486,-5.3210835998,3.1147081016<br/> Na,0.0027651062,-0.0007658154,-3.3229732451</p> |
| 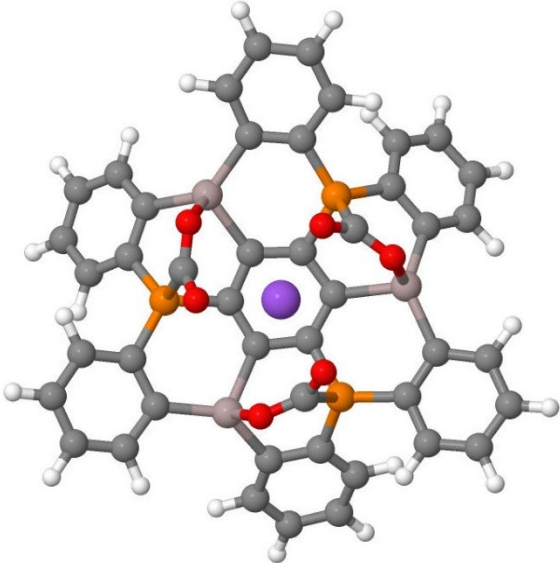 | <p><b>3CO<sub>2</sub>-Al<sub>3</sub>P<sub>3</sub>-NG-Na</b><br/> <b>E=-4093.32801436H; FreqIm=0</b><br/> C,3.4970464943,5.1207409609,2.6348152874<br/> C,3.0834740184,2.8869056098,1.0562107115<br/> C,2.0592624485,3.8642178217,1.1080683925<br/> C,4.2709737085,2.9996131927,1.7891603421<br/> C,4.4733615408,4.1281491331,2.5791736547<br/> P,-2.5929214389,1.6992633889,0.0669198997<br/> P,2.7682072452,1.3960511439,0.0676232503<br/> C,0.1388561048,1.4352816658,0.6431207481<br/> C,-1.301117063,4.2191388219,-0.1788634511<br/> C,-1.1028826306,0.8080847231,0.6581732854<br/> C,5.3671520118,1.1890230391,-0.6582653003<br/> H,5.3007711999,2.271923769,-0.7396138163<br/> C,4.25829264,0.4272046626,-0.2551620292<br/> C,1.2512692392,0.5511125415,0.6583335666<br/> C,-1.403989876,5.5872166497,-0.4810164236<br/> H,-0.5133620933,6.2113082901,-0.4367275254<br/> C,4.304641711,-0.9824000142,-0.1781167245<br/> C,-2.4987210042,3.4741768136,-0.2559719589<br/> C,-3.712880605,4.0536028952,-0.659150443</p>                                                                                                                                                                                                                                                                                                                                                                                                                                                                                                                                                                                                                                                                                                                                                                                                                                                                                                                                                                                                                                        |

|  |                                                                                                                                                                                                                                                                                                                                                                                                                                                                                                                                                                                                                                                                                                                                                                                                                                                                                                                                                                                                                                                                                                                                                                                                                                                                                                                                                                                                                                                                                                                                                                                                                                                                                                                                                                                                                                                                                                                                                                                                                                                                                                                                                                                                                                                                                                                                                                                                                                                                                                                                                                                                                                                                                                                                                                                                                                                                                                                                                                                                                                                                                                               |
|--|---------------------------------------------------------------------------------------------------------------------------------------------------------------------------------------------------------------------------------------------------------------------------------------------------------------------------------------------------------------------------------------------------------------------------------------------------------------------------------------------------------------------------------------------------------------------------------------------------------------------------------------------------------------------------------------------------------------------------------------------------------------------------------------------------------------------------------------------------------------------------------------------------------------------------------------------------------------------------------------------------------------------------------------------------------------------------------------------------------------------------------------------------------------------------------------------------------------------------------------------------------------------------------------------------------------------------------------------------------------------------------------------------------------------------------------------------------------------------------------------------------------------------------------------------------------------------------------------------------------------------------------------------------------------------------------------------------------------------------------------------------------------------------------------------------------------------------------------------------------------------------------------------------------------------------------------------------------------------------------------------------------------------------------------------------------------------------------------------------------------------------------------------------------------------------------------------------------------------------------------------------------------------------------------------------------------------------------------------------------------------------------------------------------------------------------------------------------------------------------------------------------------------------------------------------------------------------------------------------------------------------------------------------------------------------------------------------------------------------------------------------------------------------------------------------------------------------------------------------------------------------------------------------------------------------------------------------------------------------------------------------------------------------------------------------------------------------------------------------------|
|  | <p> H,-4.6175494728,3.4547581848,-0.740363807<br/> C,-2.6074502893,6.181545189,-0.8558010011<br/> Al,0.434103398,3.3525664168,0.1121963978<br/> C,6.5671616691,0.5548422285,-0.9575133325<br/> H,7.4247531449,1.1421517401,-1.2699507957<br/> C,6.6574002903,-0.8323136336,-0.8546321523<br/> C,5.5409786186,-1.577354778,-0.4798926452<br/> H,5.6361318213,-2.6607237954,-0.4356027541<br/> C,-3.7636798264,5.4099416191,-0.9583955383<br/> H,-4.7011143952,5.8590971076,-1.2706526044<br/> Al,2.6865161715,-2.0519554259,0.1121954482<br/> C,1.1736315503,-0.8378542457,0.6431812336<br/> C,-4.0501161471,-5.3492251488,-0.8537655544<br/> C,-1.7593337344,-3.9013714611,-0.255053764<br/> C,-3.0032233558,-3.2365295762,-0.1780848951<br/> C,-4.1367904159,-4.0096452827,-0.4796223799<br/> H,-5.1225413415,-3.5502896571,-0.4350172664<br/> C,-1.6544424573,-5.2428029422,-0.6577160983<br/> H,-0.6835670137,-5.7270354889,-0.7389584978<br/> C,-2.8038422624,-5.9649321866,-0.9564677454<br/> H,-2.7243139326,-7.0014869098,-1.2683215849<br/> P,-0.1748781126,-3.095520765,0.0674872362<br/> C,-1.3123379381,-0.5973907747,0.6430505662<br/> C,-4.3761310704,-0.1485427309,1.1073163235<br/> C,0.4625663407,-5.1983836123,1.7892432404<br/> H,-0.5902031842,-5.4645757118,1.7588592009<br/> C,0.9586675548,-4.1137364594,1.0561351675<br/> C,-0.1482499437,-1.3592360045,0.6581354878<br/> C,-5.4676094103,-0.4901886309,1.9153380708<br/> H,-5.7687845362,-1.5324439999,1.9959831169<br/> C,2.3171380824,-3.7153303023,1.1078400768<br/> C,-4.0418230104,1.2270875709,1.0554062537<br/> C,-4.7332728438,2.1992584774,1.7880013205<br/> H,-4.4374808435,3.2441026122,1.7567684011<br/> C,-6.1833419953,0.4687191632,2.6339070481<br/> Al,-3.1203708465,-1.3003503776,0.1119899981<br/> C,1.3387983763,-5.9382354591,2.5787378393<br/> H,0.9659571315,-6.7819677252,3.150878712<br/> C,2.6865835251,-5.5891328244,2.6342359572<br/> C,3.1588668609,-4.4896418158,1.9158567575<br/> H,4.2121916989,-4.2296345288,1.9960316265<br/> C,-5.8118864503,1.810516613,2.5779125255<br/> H,-6.3560577303,2.5553634224,3.1500257163<br/> C,2.3090578025,4.9803501404,1.91593968<br/> H,1.5571790177,5.7625002651,1.996063108<br/> H,5.0282353316,2.221278761,1.7579498679<br/> H,5.3903154709,4.22697433,3.1515926496<br/> O,-1.8793874614,1.1933294742,-2.4815259786<br/> C,-2.5727712311,0.7330878246,-1.5873000626<br/> O,-3.1283960166,-0.4175941304,-1.5453260776<br/> O,1.9257801632,-2.5002356501,-1.5450276156<br/> C,0.6513884965,-2.5949824356,-1.5867041298<br/> O,-0.09428455,-2.2251367348,-2.4808533499<br/> O,1.2027490294,2.9180592495,-1.5449724562<br/> C,1.9216107611,1.8616165598,-1.5868494104<br/> O,1.9737416619,1.0310551845,-2.4811471385<br/> H,-4.9521681654,-5.910018162,-1.0802767863<br/> H,-7.0271998348,0.1678622178,3.2481101308<br/> H,-2.6421692449,7.2429868561,-1.0829613671<br/> H,3.6582816097,6.0020706149,3.2489195868<br/> H,7.5940072998,-1.3329700574,-1.0817251366<br/> H,3.3692949358,-6.1696938574,3.247974513<br/> Na,0.0003667688,-0.000807479,-3.1903792981 </p> |
|--|---------------------------------------------------------------------------------------------------------------------------------------------------------------------------------------------------------------------------------------------------------------------------------------------------------------------------------------------------------------------------------------------------------------------------------------------------------------------------------------------------------------------------------------------------------------------------------------------------------------------------------------------------------------------------------------------------------------------------------------------------------------------------------------------------------------------------------------------------------------------------------------------------------------------------------------------------------------------------------------------------------------------------------------------------------------------------------------------------------------------------------------------------------------------------------------------------------------------------------------------------------------------------------------------------------------------------------------------------------------------------------------------------------------------------------------------------------------------------------------------------------------------------------------------------------------------------------------------------------------------------------------------------------------------------------------------------------------------------------------------------------------------------------------------------------------------------------------------------------------------------------------------------------------------------------------------------------------------------------------------------------------------------------------------------------------------------------------------------------------------------------------------------------------------------------------------------------------------------------------------------------------------------------------------------------------------------------------------------------------------------------------------------------------------------------------------------------------------------------------------------------------------------------------------------------------------------------------------------------------------------------------------------------------------------------------------------------------------------------------------------------------------------------------------------------------------------------------------------------------------------------------------------------------------------------------------------------------------------------------------------------------------------------------------------------------------------------------------------------------|

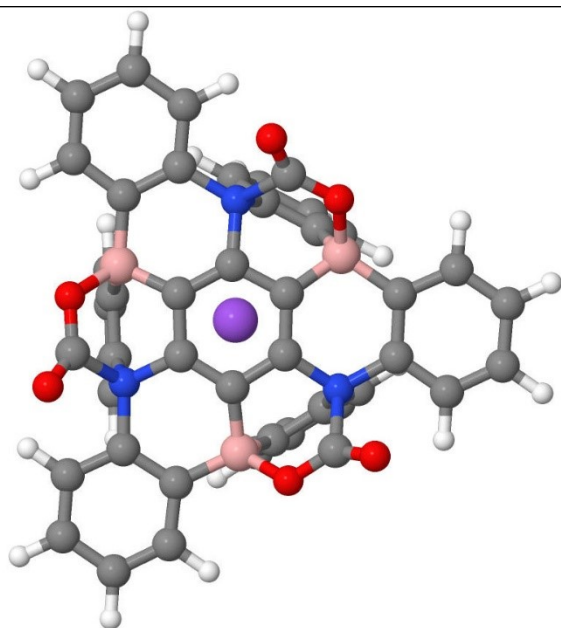

**3CO<sub>2</sub>-B<sub>3</sub>N<sub>3</sub>-NG-Na down**

**E=-2580.79302242H ; FreqIm=0**

C,-2.6837920059,1.279819393,3.2833642166  
 C,-1.9100091609,2.1088572148,0.7654242534  
 C,-2.687226703,0.9441655965,0.8730900892  
 C,-1.5299051025,2.8738681419,1.8614617063  
 C,-1.9212110573,2.4371719001,3.1341499984  
 N,-1.3804060112,-2.4260226349,-0.6240959226  
 N,-1.410312027,2.4086620747,-0.6282391608  
 C,-1.4027008375,0.0299873289,-1.0212835519  
 C,-3.6156012565,-1.2096099661,-0.6393734204  
 C,-0.7145370335,-1.1498798601,-1.0277139704  
 C,-1.4183124275,4.8591258615,-0.6697814365  
 H,-2.5012079135,4.8075761489,-0.6684216571  
 C,-0.6471933345,3.6973774203,-0.6934891584  
 C,-0.6379627068,1.1934333187,-1.0298008037  
 C,-5.0128189484,-1.3327922998,-0.6252636943  
 H,-5.6088843054,-0.4233501618,-0.6069641732  
 C,0.7606576774,3.7360440415,-0.642824448  
 C,-2.878108507,-2.4095250251,-0.6882847067  
 C,-3.4985008836,-3.6582551697,-0.6618912968  
 H,-2.9122136166,-4.5701821923,-0.6595575577  
 C,-5.6489611096,-2.5693493418,-0.6362341032  
 C,-0.7917397021,6.0996619618,-0.6513732624  
 H,-1.3949890606,7.0015734626,-0.6475097449  
 C,0.6001234913,6.1768010596,-0.6442911299  
 C,1.352797042,5.0075560266,-0.6303171183  
 H,2.4384251654,5.068899007,-0.6110926073  
 C,-4.8861095536,-3.7360530605,-0.6419622164  
 H,-5.3654556321,-4.7094800702,-0.635873073  
 C,0.7278725002,1.1994095157,-1.0222339314  
 C,5.0499416001,-3.6080028232,-0.6433603683  
 C,3.5259828064,-1.2882195783,-0.6909671642  
 C,2.8557390365,-2.5268989778,-0.6402050664  
 C,3.6610026633,-3.6753346408,-0.6284591831  
 H,3.1714499572,-4.6462500509,-0.6093351654  
 C,4.9177014721,-1.2012179511,-0.6677494186  
 H,5.4144229201,-0.237598041,-0.6665420584  
 C,5.6789091996,-2.3639930677,-0.6501973717  
 H,6.7616049862,-2.2923868384,-0.647058136  
 N,2.7914612541,0.0170810363,-0.6265634314  
 C,0.6753368327,-1.2304557006,-1.0202915765  
 C,0.5276820437,-2.7981010279,0.8759624799  
 C,3.2541448433,-0.1097057042,1.8629063971  
 H,3.7450615393,-1.0699732093,1.7500239362  
 C,2.7807537576,0.6007068506,0.7664851326  
 C,1.3530933855,-0.044604687,-1.0289334391  
 C,1.0654331235,-2.9301086479,2.1568380741  
 H,2.1437201766,-3.0183237713,2.2703097098  
 C,2.1601957907,1.8560354056,0.8729758399  
 C,-0.8696339812,-2.7070778674,0.7693350706  
 C,-1.7215506582,-2.7586440114,1.8659846315  
 H,-2.7985454442,-2.7023205811,1.7533034204  
 C,0.2367391878,-2.9598945175,3.2866833625  
 C,3.0714299974,0.4484188762,3.1351636475  
 H,3.4326736738,-0.0901222193,4.0058802446  
 C,2.4493434018,1.6870853822,3.2833906289  
 C,2.0066485523,2.3884704636,2.1536748637  
 H,1.5428772943,3.3659403925,2.2670785284  
 C,-1.1469674705,-2.8776827378,3.1384095694  
 H,-1.7939302032,-2.9185988051,4.0092843494  
 C,-3.0710985584,0.5457136944,2.154153272  
 H,-3.6859808684,-0.3443964082,2.2681824936

|                                                                                    |                                                                                                                                                                                                                                                                                                                                                                                                                                                                                                                                                                                                                                                                                                                                                                                                                                                                                                                                                                                                                                                                                                                                                                                                                                                                                                                                                                                                                                                                                                                                                                                                                                                                                                                                                                                                                                                                                                                                                                                                                                                                                                                |
|------------------------------------------------------------------------------------|----------------------------------------------------------------------------------------------------------------------------------------------------------------------------------------------------------------------------------------------------------------------------------------------------------------------------------------------------------------------------------------------------------------------------------------------------------------------------------------------------------------------------------------------------------------------------------------------------------------------------------------------------------------------------------------------------------------------------------------------------------------------------------------------------------------------------------------------------------------------------------------------------------------------------------------------------------------------------------------------------------------------------------------------------------------------------------------------------------------------------------------------------------------------------------------------------------------------------------------------------------------------------------------------------------------------------------------------------------------------------------------------------------------------------------------------------------------------------------------------------------------------------------------------------------------------------------------------------------------------------------------------------------------------------------------------------------------------------------------------------------------------------------------------------------------------------------------------------------------------------------------------------------------------------------------------------------------------------------------------------------------------------------------------------------------------------------------------------------------|
|                                                                                    | <p>H,-0.9425234868,3.778303893,1.7481496382<br/> H,-1.6339456754,3.019072354,4.0045172658<br/> O,-1.4148925767,-4.0427630906,-2.4634044358<br/> C,-0.6826216444,-3.5499833942,-1.6805076417<br/> O,0.5677279107,-3.6519239373,-1.4565716611<br/> O,2.8780482907,2.3170830927,-1.4602215275<br/> C,3.4149418095,1.1833086081,-1.6842821834<br/> O,4.2071527187,0.7953535691,-2.4677406312<br/> O,-3.4457685404,1.3331284755,-1.4602523219<br/> C,-2.7323243008,2.3647888506,-1.6852240723<br/> O,-2.7924133682,3.2441550976,-2.469473023<br/> H,5.6410969324,-4.5184946241,-0.6408088437<br/> H,0.6693989553,-3.0668173269,4.2772201735<br/> H,-6.7330455388,-2.6260481906,-0.6314516866<br/> H,-2.9932354123,0.9596708818,4.2740883327<br/> H,1.0931332405,7.1439582504,-0.6408089483<br/> H,2.3266829489,2.1158922869,4.2737810446<br/> Na,-0.0013543733,0.0018273673,1.9227232784<br/> B,-2.893124762,0.2044143716,-0.5555029165<br/> B,1.2698883324,-2.6081729567,-0.5537959071<br/> B,1.6235932485,2.403338494,-0.556596325</p>                                                                                                                                                                                                                                                                                                                                                                                                                                                                                                                                                                                                                                                                                                                                                                                                                                                                                                                                                                                                                                                                            |
| 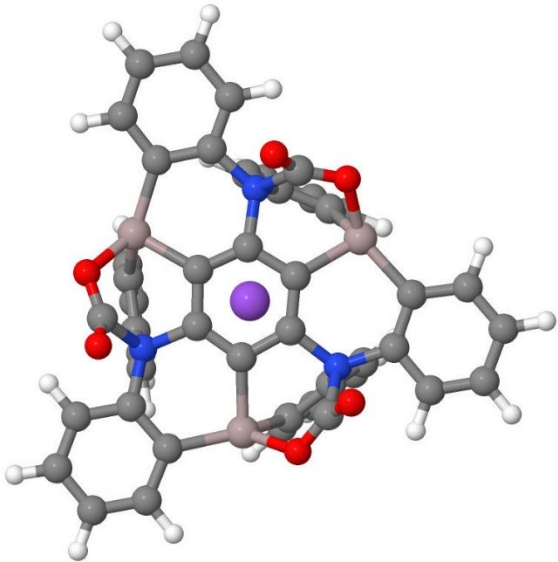 | <p><b>3CO<sub>2</sub>-Al<sub>3</sub>N<sub>3</sub>-NG-Na down</b><br/> <b>E=-3233.43392377H ; FreqIm=0</b></p> <p>C,-1.2097156016,-2.8737468902,3.5260664595<br/> C,-1.8223448721,-2.3638229575,0.8536455366<br/> C,-0.6447372787,-3.0818248005,1.1485199411<br/> C,-2.6816110839,-1.9133428973,1.8612651705<br/> C,-2.3628363438,-2.1664607696,3.1982807618<br/> N,2.7165512566,-0.8606736246,-0.5822140408<br/> N,-2.102089048,-1.9223078353,-0.5821904675<br/> C,0.2665415213,-1.3940375449,-0.9032277654<br/> C,2.407657486,-3.4483121669,-0.6877936641<br/> C,1.2751954073,-0.46382039,-0.8899802806<br/> C,-4.3414324743,-2.7979542414,-0.7613802427<br/> H,-3.8566270947,-3.7714893815,-0.7447859234<br/> C,-3.5777186899,-1.6281025052,-0.7236559587<br/> C,-1.0382948052,-0.8718779382,-0.8885232754<br/> C,3.0963701683,-4.6763091746,-0.7537663988<br/> H,2.5232119765,-5.6005104298,-0.7403434215<br/> C,-4.1884068823,-0.3605113118,-0.6808329884<br/> C,3.2000752254,-2.2853539369,-0.7264223597<br/> C,4.5949899784,-2.3615585596,-0.7627851824<br/> H,5.1957270384,-1.455009052,-0.7432993232<br/> C,4.4807768865,-4.7624728388,-0.8278360856<br/> Al,0.4836073561,-3.2691970367,-0.4603306264<br/> C,-5.7261667276,-2.7376881545,-0.8143838614<br/> H,-6.3010781417,-3.6571985671,-0.8552983252<br/> C,-6.3635080434,-1.4983553581,-0.8192155256<br/> C,-5.5964351126,-0.3427630616,-0.7441388619<br/> H,-6.1102180603,0.6156598885,-0.7275662868<br/> C,5.2352784762,-3.5907562376,-0.8188608268<br/> H,6.3190819505,-3.6286852848,-0.8591146115<br/> Al,-3.0709660235,1.216091356,-0.4532905361<br/> C,-1.3393695637,0.4668750165,-0.8998160865<br/> C,1.8868562364,6.2601069992,-0.8257516609<br/> C,0.3804052671,3.9131391818,-0.7255230233<br/> C,1.7835990589,3.8079868098,-0.6818499519<br/> C,2.5036156908,5.0179618554,-0.7472634827<br/> H,3.5905046383,4.9831994297,-0.7299164049<br/> C,-0.2502471804,5.1595144069,-0.7669995311<br/> H,-1.3357032086,5.2272404577,-0.7515127181<br/> C,0.494903373,6.3281892876,-0.8223628606<br/> H,-0.0136868261,7.2858232048,-0.8665843576</p> |

|                                                                                     |                                                                                                                                                                                                                                                                                                                                                                                                                                                                                                                                                                                                                                                                                                                                                                                                                                                                                                                                                                                                                                                                                                                                                                                                                                                                                                                                                                                                                                                                                                                                                                                                                                                                                                                                                                                                                                                                                                                                                                                                                                                               |
|-------------------------------------------------------------------------------------|---------------------------------------------------------------------------------------------------------------------------------------------------------------------------------------------------------------------------------------------------------------------------------------------------------------------------------------------------------------------------------------------------------------------------------------------------------------------------------------------------------------------------------------------------------------------------------------------------------------------------------------------------------------------------------------------------------------------------------------------------------------------------------------------------------------------------------------------------------------------------------------------------------------------------------------------------------------------------------------------------------------------------------------------------------------------------------------------------------------------------------------------------------------------------------------------------------------------------------------------------------------------------------------------------------------------------------------------------------------------------------------------------------------------------------------------------------------------------------------------------------------------------------------------------------------------------------------------------------------------------------------------------------------------------------------------------------------------------------------------------------------------------------------------------------------------------------------------------------------------------------------------------------------------------------------------------------------------------------------------------------------------------------------------------------------|
|                                                                                     | <p>N,-0.6121971794,2.7827879381,-0.5809979577<br/> C,1.075047921,0.9273398067,-0.9019710823<br/> C,2.9870558116,0.976678463,1.1538667569<br/> C,-0.313690384,3.2874697253,1.8608686986<br/> H,0.6071623646,3.8103489186,1.6308153996<br/> C,-1.132887966,2.7636505361,0.8553462322<br/> C,-0.2349189881,1.3361076546,-0.8873279681<br/> C,3.0581059464,1.3298304951,2.5089418442<br/> H,3.0891837189,2.3840989118,2.776958817<br/> C,-2.3426974899,2.1025368311,1.1529265976<br/> C,2.9551606255,-0.4014517783,0.855389678<br/> C,2.9914008757,-1.3735589422,1.8605018626<br/> H,2.9840805468,-2.4323162199,1.6296211553<br/> C,3.0802954076,0.3770196521,3.5302528799<br/> Al,2.5892801342,2.0518851696,-0.4535330649<br/> C,-0.6919009826,3.1427424753,3.1984045317<br/> H,-0.0521496897,3.5521717878,3.974405697<br/> C,-1.8800824385,2.4975372418,3.5288559877<br/> C,-2.6892972984,1.9948636006,2.5072605953<br/> H,-3.6186654218,1.4956703505,2.7744052587<br/> C,3.0460574474,-0.9744505654,3.1988369335<br/> H,3.0743207633,-1.7336138361,3.9746932318<br/> C,-0.3738903234,-3.3262226939,2.5023829724<br/> H,0.5237002372,-3.8815414837,2.7674654705<br/> H,-3.5946073195,-1.3760628636,1.6332111278<br/> H,-3.0342057046,-1.8148564373,3.9759300025<br/> O,3.6614174031,-0.6565795549,-2.8309774862<br/> C,3.5483804945,0.0117673722,-1.8690728882<br/> O,3.8239546791,1.1932600495,-1.530826187<br/> O,-2.9432506252,2.7120065721,-1.5349271541<br/> C,-1.7822949836,3.0649644542,-1.8715737962<br/> O,-1.2577658436,3.4960165933,-2.8326316351<br/> O,-0.8776829433,-3.904787822,-1.5398116826<br/> C,-1.7642843676,-3.0749180897,-1.8736219148<br/> O,-2.4013888647,-2.8357141896,-2.8336091487<br/> H,2.4816223537,7.1666568957,-0.8774586746<br/> H,3.1325171799,0.6854570689,4.5702872612<br/> H,4.9691014354,-5.7304700565,-0.8805268402<br/> H,-0.9684579618,-3.0780032283,4.5651080669<br/> H,-7.4460831721,-1.4368948272,-0.8692870237<br/> H,-2.1774633492,2.3945854156,4.5683170707<br/> Na,0.0088679113,-0.0081538382,1.7083842027</p> |
| 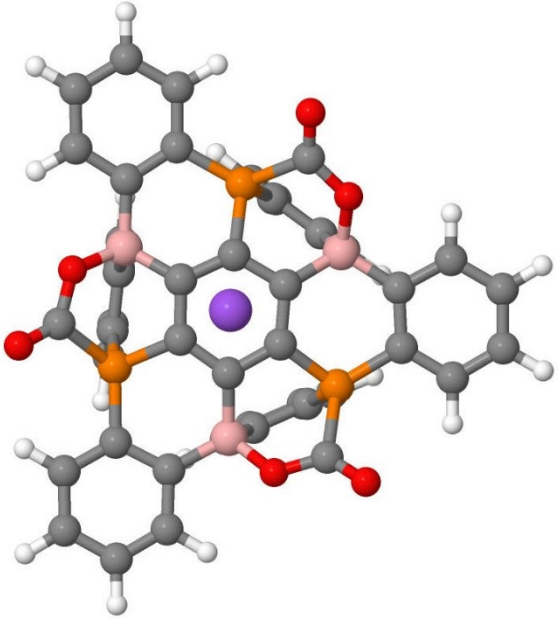 | <p><b>3CO<sub>2</sub>-B<sub>3</sub>P<sub>3</sub>-NG-Na down</b><br/> <b>E=-3440.60555839H; FreqIm=0</b><br/> C,0.0077805538,-2.8996861569,3.2988819738<br/> C,-1.4303381466,-2.4985715693,0.9809249316<br/> C,-0.063860986,-2.8431566433,0.860320368<br/> C,-2.0860280505,-2.3857603746,2.2048782287<br/> C,-1.3470648456,-2.5725137343,3.3786008378<br/> P,2.9421968663,-0.8064723871,-0.6413045462<br/> P,-2.1699028225,-2.1442023629,-0.6435411954<br/> C,0.3164652796,-1.3914455165,-1.1971477373<br/> C,2.0838508775,-3.4177964754,-0.7458492619<br/> C,1.3001164115,-0.4141597257,-1.2240516961<br/> C,-4.9015406051,-2.4075611982,-0.7346837207<br/> H,-4.7189391264,-3.4794393154,-0.7332172611<br/> C,-3.8304604163,-1.5023027479,-0.6972993902<br/> C,-1.0089938005,-0.9178613343,-1.2256264542<br/> C,2.3604788922,-4.7885886216,-0.8278925474<br/> H,1.5269574918,-5.4839004176,-0.8851359058<br/> C,-4.0021221455,-0.0954690964,-0.7465952281<br/> C,3.2162800565,-2.5657714438,-0.6951465732<br/> C,4.5358266692,-3.0407578931,-0.7334760773</p>                                                                                                                                                                                                                                                                                                                                                                                                                                                                                                                                                                                                                                                                                                                                                                                                                                                                                                                                                                                                |

|  |                                                                                                                                                                                                                                                                                                                                                                                                                                                                                                                                                                                                                                                                                                                                                                                                                                                                                                                                                                                                                                                                                                                                                                                                                                                                                                                                                                                                                                                                                                                                                                                                                                                                                                                                                                                                                                                                                                                                                                                                                                                                                                                                                                                                                                                                                                                                                                                                                                                                                                                                                                                                                                                                                                                                                                                                                                                                                                                                                                                                                                                                                                 |
|--|-------------------------------------------------------------------------------------------------------------------------------------------------------------------------------------------------------------------------------------------------------------------------------------------------------------------------------------------------------------------------------------------------------------------------------------------------------------------------------------------------------------------------------------------------------------------------------------------------------------------------------------------------------------------------------------------------------------------------------------------------------------------------------------------------------------------------------------------------------------------------------------------------------------------------------------------------------------------------------------------------------------------------------------------------------------------------------------------------------------------------------------------------------------------------------------------------------------------------------------------------------------------------------------------------------------------------------------------------------------------------------------------------------------------------------------------------------------------------------------------------------------------------------------------------------------------------------------------------------------------------------------------------------------------------------------------------------------------------------------------------------------------------------------------------------------------------------------------------------------------------------------------------------------------------------------------------------------------------------------------------------------------------------------------------------------------------------------------------------------------------------------------------------------------------------------------------------------------------------------------------------------------------------------------------------------------------------------------------------------------------------------------------------------------------------------------------------------------------------------------------------------------------------------------------------------------------------------------------------------------------------------------------------------------------------------------------------------------------------------------------------------------------------------------------------------------------------------------------------------------------------------------------------------------------------------------------------------------------------------------------------------------------------------------------------------------------------------------------|
|  | <p> H,5.3728566558,-2.3466997765,-0.7316497592<br/> C,3.6657181189,-5.2788800297,-0.8591064791<br/> B,0.5538801659,-2.9125300104,-0.6739691673<br/> C,-6.1980698689,-1.9142632166,-0.8106562312<br/> H,-7.0382169544,-2.5998036065,-0.8486701084<br/> C,-6.4049055114,-0.5348758865,-0.8571946432<br/> C,-5.3277172835,0.3503522892,-0.8266678524<br/> H,-5.5133581312,1.4198767745,-0.8830192997<br/> C,4.7568938861,-4.4101314209,-0.8112385374<br/> H,5.7706707237,-4.7948974001,-0.8497258489<br/> B,-2.799660208,0.9770489646,-0.6749055271<br/> C,-1.3635721028,0.4227828766,-1.1982552455<br/> C,2.739229788,5.8146162278,-0.8618277393<br/> C,0.6141658254,4.0692269006,-0.6973337293<br/> C,1.9184123658,3.5143858188,-0.7452073791<br/> C,2.9672550095,4.4392369955,-0.8271174625<br/> H,3.9862951228,4.0650268425,-0.8817407814<br/> C,0.3656993096,5.4492923038,-0.7393651166<br/> H,-0.6539282575,5.8270701052,-0.7396993061<br/> C,1.4411501931,6.3252797422,-0.8176892556<br/> H,1.2674773733,7.395470804,-0.8597373605<br/> P,-0.7723183755,2.9521770477,-0.6433381669<br/> C,1.0475450509,0.9705377805,-1.1964295451<br/> C,2.4933539905,1.367580975,0.8616282371<br/> C,-1.0223350214,2.9958562594,2.205507369<br/> H,-0.2894061254,3.7979676862,2.2492905535<br/> C,-1.4488627757,2.48721423,0.9808330038<br/> C,-0.2906669539,1.333876051,-1.2255208763<br/> C,2.3225612314,2.0768101524,2.0543400924<br/> H,2.0609676048,3.1320299398,2.0111882198<br/> C,-2.4307537535,1.4762411629,0.8592106804<br/> C,2.8786020848,0.0119505636,0.9828550749<br/> C,3.1090060231,-0.6111739312,2.2072397182<br/> H,3.4377038854,-1.6468450088,2.2504865573<br/> C,2.5074647848,1.4596911211,3.3001407362<br/> B,2.2459070706,1.9368350379,-0.672291609<br/> C,-1.5536504683,2.4478215281,3.3786699954<br/> H,-1.2333154101,2.8226214288,4.3460957818<br/> C,-2.5153665845,1.4390256589,3.2976710706<br/> C,-2.9587698986,0.9720976328,2.0515403771<br/> H,-3.7412813112,0.2173752466,2.0078142066<br/> C,2.9018176559,0.1229521413,3.3806769164<br/> H,3.0693738605,-0.3410833615,4.3479221773<br/> C,0.6354998621,-3.0488824253,2.0533901961<br/> H,1.6805206697,-3.348863844,2.0109367226<br/> H,-3.1473083492,-2.1521255579,2.2478001971<br/> H,-1.8331538208,-2.4844699219,4.3455218284<br/> O,5.0387393712,0.100351295,-2.1380211707<br/> C,4.0376297465,0.4368814487,-1.5738055879<br/> O,3.5230951455,1.6304984848,-1.4638269504<br/> O,-3.1730483883,2.2362669425,-1.4662887208<br/> C,-2.3963962933,3.2785257672,-1.5765019808<br/> O,-2.6054218245,4.3135339932,-2.1411894346<br/> O,-0.3496207693,-3.8649953122,-1.4663610442<br/> C,-1.6406440336,-3.7141964313,-1.5758397983<br/> O,-2.4323773917,-4.4120782971,-2.1414486034<br/> H,3.834119671,-6.3493680862,-0.9319933322<br/> H,3.58220195,6.495558676,-0.9346306913<br/> H,-2.941860126,1.0299456212,4.2096419182<br/> H,-7.4162722014,-0.1454092712,-0.9279060451<br/> H,0.5742255644,-3.0651241179,4.2113984541<br/> H,2.3684562862,2.0338478408,4.2122657974<br/> Na,-0.0039420067,-0.0019894304,1.8985417604 </p> |
|--|-------------------------------------------------------------------------------------------------------------------------------------------------------------------------------------------------------------------------------------------------------------------------------------------------------------------------------------------------------------------------------------------------------------------------------------------------------------------------------------------------------------------------------------------------------------------------------------------------------------------------------------------------------------------------------------------------------------------------------------------------------------------------------------------------------------------------------------------------------------------------------------------------------------------------------------------------------------------------------------------------------------------------------------------------------------------------------------------------------------------------------------------------------------------------------------------------------------------------------------------------------------------------------------------------------------------------------------------------------------------------------------------------------------------------------------------------------------------------------------------------------------------------------------------------------------------------------------------------------------------------------------------------------------------------------------------------------------------------------------------------------------------------------------------------------------------------------------------------------------------------------------------------------------------------------------------------------------------------------------------------------------------------------------------------------------------------------------------------------------------------------------------------------------------------------------------------------------------------------------------------------------------------------------------------------------------------------------------------------------------------------------------------------------------------------------------------------------------------------------------------------------------------------------------------------------------------------------------------------------------------------------------------------------------------------------------------------------------------------------------------------------------------------------------------------------------------------------------------------------------------------------------------------------------------------------------------------------------------------------------------------------------------------------------------------------------------------------------------|

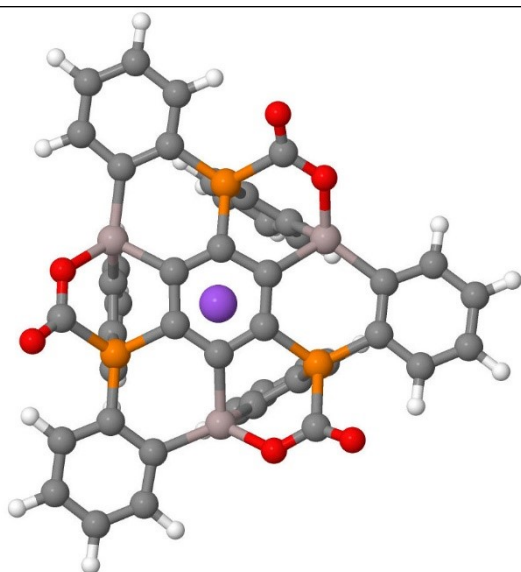

**3CO<sub>2</sub>-Al<sub>3</sub>P<sub>3</sub>-NG-Na down**

**E=-4093.30831740H; FreqIm=0**

C,-0.9979300584,-2.5530476376,3.6154398449  
 C,-1.9019238935,-2.3196471334,1.010267471  
 C,-0.6033854941,-2.854998638,1.2117769226  
 C,-2.7420732124,-1.9419265685,2.060758051  
 C,-2.2762891182,-2.0533121684,3.3742786136  
 P,2.9414354041,-1.0738281139,-0.7254035726  
 P,-2.4021002103,-2.0096506796,-0.7288222517  
 C,0.2136989115,-1.4216086605,-1.2271731445  
 C,2.2617670907,-3.8084325015,-0.6166802287  
 C,1.2705788962,-0.5105746442,-1.2424271008  
 C,-5.0934858354,-2.4102329027,-0.9555914841  
 H,-4.823611592,-3.4486834504,-1.116287627  
 C,-4.1086123398,-1.4226304785,-0.809321592  
 C,-1.0782224519,-0.8441944179,-1.2437004778  
 C,2.6706347765,-5.150076587,-0.5963334558  
 H,1.92645391,-5.934081286,-0.4726339477  
 C,-4.4304745824,-0.054074553,-0.6184971267  
 C,3.2864807461,-2.8453269006,-0.8044267824  
 C,4.6345550891,-3.2042843453,-0.947095294  
 H,5.39930684,-2.4511612511,-1.1052200247  
 C,4.0077862977,-5.522867113,-0.742844756  
 Al,0.3794181619,-3.2702371367,-0.5027533318  
 C,-6.4367778517,-2.043581782,-0.9250347293  
 H,-7.2019481028,-2.8031895206,-1.0490182954  
 C,-6.7881226694,-0.7085893333,-0.7479947064  
 C,-5.7967957034,0.2625917809,-0.5981172868  
 H,-6.1037537285,1.298720366,-0.4718440598  
 C,4.9887289583,-4.550901347,-0.9162678716  
 H,6.0295221097,-4.8335915836,-1.0374959619  
 Al,-3.0227173428,1.3063617985,-0.5035680492  
 C,-1.3389495339,0.5266754733,-1.2286839697  
 C,2.7793590363,6.2338879986,-0.7479385237  
 C,0.820906992,4.2707386077,-0.8080114869  
 C,2.1670208797,3.865011564,-0.6181207666  
 C,3.1246407206,4.8897283031,-0.5983177677  
 H,4.1754637455,4.6372905657,-0.4727222726  
 C,0.4580683447,5.6175505504,-0.953794141  
 H,-0.576161368,5.9034070517,-1.1139250064  
 C,1.4474439792,6.59732653,-0.9238718462  
 H,1.1722237943,7.6398316018,-1.0475485489  
 P,-0.5407289554,3.0861093494,-0.7285965626  
 C,1.124650081,0.897111207,-1.2271051628  
 C,2.7708359152,0.9079151293,1.2144455517  
 C,-0.307957074,3.3389157086,2.0609100724  
 H,0.5233285776,4.0130271252,1.8640852113  
 C,-1.0583266445,2.8048459075,1.0103769729  
 C,-0.1928519282,1.3569056713,-1.2443544933  
 C,2.6520751022,1.321895157,2.5494973042  
 H,2.5217171249,2.3795990968,2.7710324722  
 C,-2.1714062873,1.9480591161,1.2115264578  
 C,2.9580844644,-0.4843196946,1.0133744332  
 C,3.0535731451,-1.400204598,2.0641787826  
 H,3.2239090332,-2.4568593037,1.867398683  
 C,2.7089901882,0.4157192979,3.618334291  
 Al,2.6413892194,1.9656640429,-0.5012019557

|  |                                                                                                                                                                                                                                                                                                                                                                                                                                                                                                                                                                                                                                                                                                                                                                                                                                                                                                                                                                                                                                                                                                                                                                                                                                                                   |
|--|-------------------------------------------------------------------------------------------------------------------------------------------------------------------------------------------------------------------------------------------------------------------------------------------------------------------------------------------------------------------------------------------------------------------------------------------------------------------------------------------------------------------------------------------------------------------------------------------------------------------------------------------------------------------------------------------------------------------------------------------------------------------------------------------------------------------------------------------------------------------------------------------------------------------------------------------------------------------------------------------------------------------------------------------------------------------------------------------------------------------------------------------------------------------------------------------------------------------------------------------------------------------|
|  | C,-0.634009414,2.9866338801,3.3739823603<br>H,-0.0567251048,3.389016275,4.2012772368<br>C,-1.7063020845,2.1297124372,3.6147689407<br>C,-2.4672646839,1.6335303339,2.5462288346<br>H,-3.318740028,0.9926939064,2.7677896082<br>C,2.9175035405,-0.9409687147,3.3775847704<br>H,2.9838168862,-1.6412180226,4.2051400523<br>C,-0.1854139304,-2.9588657678,2.5468046983<br>H,0.7950961735,-3.3762369058,2.7684396694<br>H,-3.7415247439,-1.5590868631,1.8637547969<br>H,-2.9151951698,-1.7584721323,4.2016079084<br>O,5.0616976928,-0.5127419887,-2.3296903547<br>C,4.233973514,0.0232235849,-1.6494330101<br>O,4.0570097741,1.282855239,-1.4163462939<br>O,-3.1387533152,2.87227562,-1.4209881683<br>C,-2.1377402104,3.6576240252,-1.651262819<br>O,-2.0888503428,4.644700965,-2.3283483371<br>O,-0.9183750627,-4.1536354439,-1.4211043308<br>C,-2.0972505088,-3.6762550863,-1.6548499855<br>O,-2.9748057644,-4.1240650314,-2.3364391296<br>H,3.5525809422,6.9963279159,-0.7314381439<br>H,2.6121169745,0.7749525612,4.6393829947<br>H,4.2817593212,-6.5736332169,-0.7256760486<br>H,-0.6384362158,-2.6483552632,4.6365550451<br>H,-7.8351036491,-0.4204898911,-0.7308730403<br>H,-1.9662984743,1.862861927,4.6356201023<br>Na,-0.0033830031,0.008366597,1.6961037311 |
|--|-------------------------------------------------------------------------------------------------------------------------------------------------------------------------------------------------------------------------------------------------------------------------------------------------------------------------------------------------------------------------------------------------------------------------------------------------------------------------------------------------------------------------------------------------------------------------------------------------------------------------------------------------------------------------------------------------------------------------------------------------------------------------------------------------------------------------------------------------------------------------------------------------------------------------------------------------------------------------------------------------------------------------------------------------------------------------------------------------------------------------------------------------------------------------------------------------------------------------------------------------------------------|



**Table S9.** Energy partition terms (kJ mol<sup>-1</sup>)

| NG                             | Adduct               | $\Sigma E_{\text{def}}(i)$ | $\Sigma \Sigma \Delta^2 E(ij)$ | C     |
|--------------------------------|----------------------|----------------------------|--------------------------------|-------|
| Al <sub>3</sub> N <sub>3</sub> | 1CO <sub>2</sub> -NG | +335.8                     | -331.8                         | -     |
|                                | 2CO <sub>2</sub> -NG | +523.6                     | -512.0                         | -5.8  |
|                                | 3CO <sub>2</sub> -NG | +809.7                     | -792.2                         | -21.6 |
| B <sub>3</sub> P <sub>3</sub>  | 1CO <sub>2</sub> -NG | +408.0                     | -415.3                         | -     |
|                                | 2CO <sub>2</sub> -NG | +841.3                     | -850.9                         | -24.1 |
|                                | 3CO <sub>2</sub> -NG | +1293.4                    | -1293.3                        | -80.4 |
| Al <sub>3</sub> P <sub>3</sub> | 1CO <sub>2</sub> -NG | +250.4                     | -349.5                         | -     |
|                                | 2CO <sub>2</sub> -NG | +655.4                     | -870.4                         | -8.1  |
|                                | 3CO <sub>2</sub> -NG | +1009.8                    | -1343.4                        | -26.9 |

**Figure S1.** Overlap of the optimized geometry of B3N3-NG (blue) and CSD refcode FEWKIE (green).

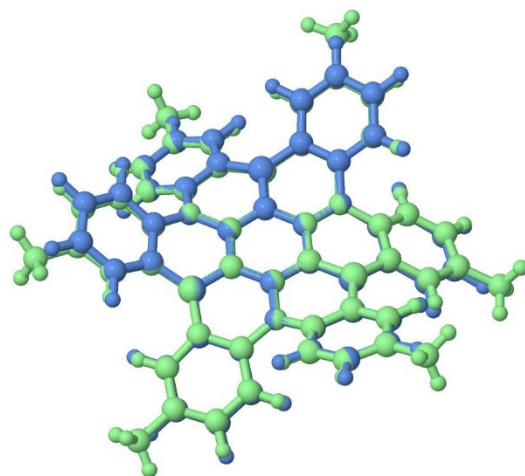

Jmol

**Figure S2.** Free energy profiles of the capture of one CO<sub>2</sub> molecule by the B<sub>3</sub>N<sub>3</sub>-NG, B<sub>3</sub>P<sub>3</sub>-NG, Al<sub>3</sub>N<sub>3</sub>-NG and Al<sub>3</sub>P<sub>3</sub>-NG systems at M06-2X/6-311++G(3df,3dp)//M06-2X/6-31+G\* level of theory.

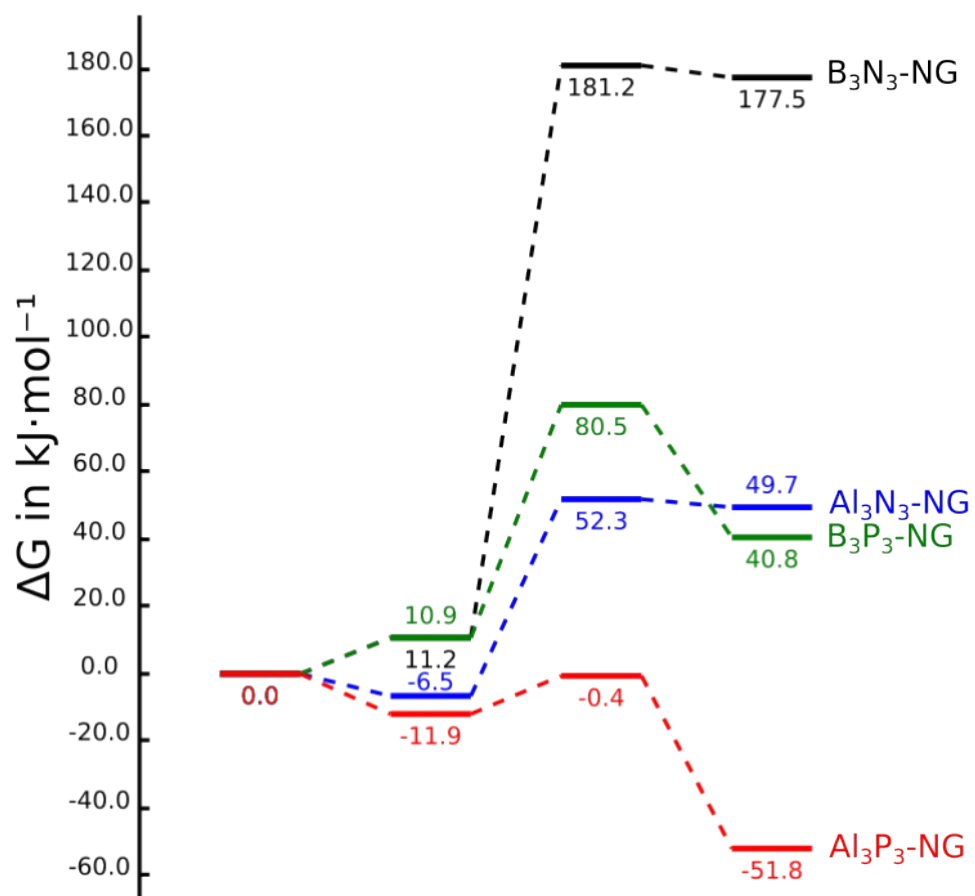

**Figure S3:** Exponential correlation of the six BCP's obtained for the Al-O and C-P contacts vs. the interatomic distances.

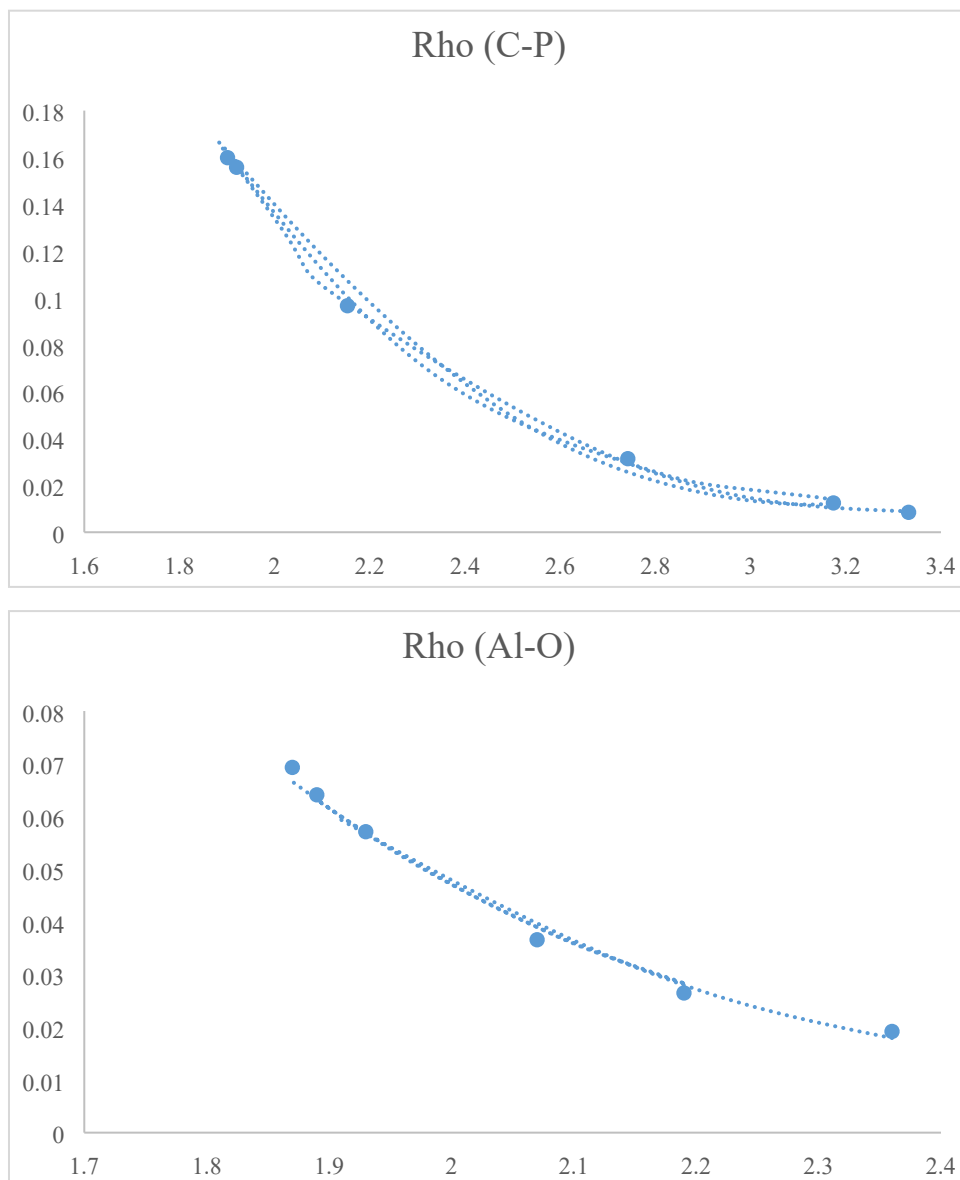

**Figure S4:** Superposition of the NG-Na-up (blue), NG-Na-low (green) and NG (yellow) geometry, along with the decomposition of the binding energy ( $E_b = E_{def} + E_{interaction}$ ) in kJ/mol.

|                   |                                                                                    |                                                                                     |
|-------------------|------------------------------------------------------------------------------------|-------------------------------------------------------------------------------------|
|                   | <i>B<sub>3</sub>N<sub>3</sub>-NG</i>                                               | <i>Al<sub>3</sub>N<sub>3</sub>-NG</i>                                               |
|                   | 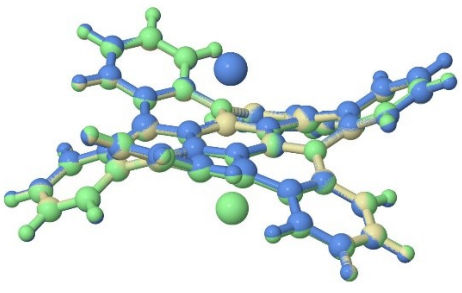  |   |
| $E_b$ (NG-Na-up)  | -166.8                                                                             | -200.3                                                                              |
| EDA               | =3.5+(-170.3)                                                                      | =7.9+(-208.2)                                                                       |
| $E_b$ (NG-Na-low) | -166.8                                                                             | -200.2                                                                              |
| EDA               | =3.5+(-170.3)                                                                      | =7.8+(-208.2)                                                                       |
|                   | <i>B<sub>3</sub>P<sub>3</sub>-NG</i>                                               | <i>Al<sub>3</sub>P<sub>3</sub>-NG</i>                                               |
|                   |  |  |
| $E_b$ (NG-Na-up)  | -175.3                                                                             | -193.8                                                                              |
| EDA               | =3.5+(-178.9)                                                                      | = 5.8+(-199.5)                                                                      |
| $E_b$ (NG-Na-low) | -182.6                                                                             | -185.4                                                                              |
| EDA               | =5.0+(-187.9)                                                                      | =15.0+(-200.4)                                                                      |

**Figure S5:** Comparative energy profiles of the reaction of B<sub>3</sub>N<sub>3</sub>-NG and B<sub>3</sub>P<sub>3</sub>-NG in the absence/presence of Na<sup>+</sup> with three molecules of CO<sub>2</sub>.

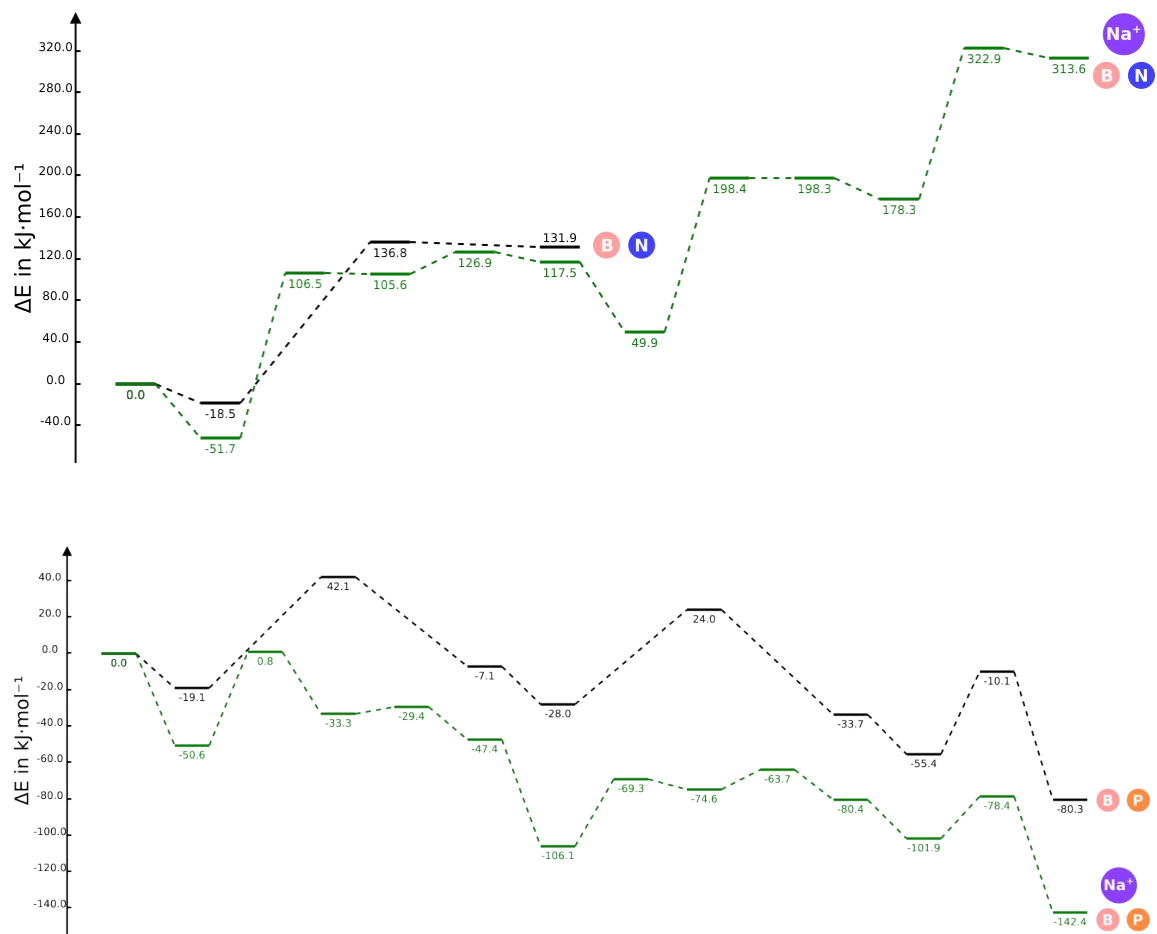

Supplement: d4cp00496e1.pdf [file d4cp00496e1.pdf]
